# Supplementary material for: PRDM15 regulates differentiation and proliferation of hematopoietic stem cells
Source: Research Square preprint supplement (doi:10.21203/rs.3.rs-7956606/v1), 2025-11-03
Supplement: Supplementary file 1 [file 7c29b964e482446c3c855f71.xlsx]

## Sheet: Legend
Supplementary Table Information
Table S1	Significant gene expression cKit+
Table S2	Significant gene expression cKit-
Table S3	GSEA for cKit+
Table S4	GSEA for cKit-
Table S5	PRDM15 Annotated Peaks cKit+
Table S6	PRDM15 Annotated Peaks cKit-
Table S7	PRDM15 bound and regulated in cKit+ and cKit-
Table S8	Genotyping and qPCR primers

## Sheet: Table S1
Table S1: Gene Expression cKit+
gene_id	baseMean	log2FoldChange	lfcSE	pvalue	padj	status	gene_name
ENSMUSG00000042066	91.6699	0.837008	0.257223	1.82887e-05	0.00219653	up_regulated	Tmcc2
ENSMUSG00000026576	217.321	0.865957	0.183258	2.04459e-07	4.30135e-05	up_regulated	Atp1b1
ENSMUSG00000038179	110.287	1.02263	0.212548	6.85857e-08	1.69262e-05	up_regulated	Slamf7
ENSMUSG00000104413	47.0261	1.05701	0.311683	5.68633e-06	0.000868723	up_regulated	Gm37065
ENSMUSG00000015314	80.1263	1.08225	0.232352	9.74064e-08	2.31484e-05	up_regulated	Slamf6
ENSMUSG00000039997	57.2648	0.703396	0.30436	0.000117325	0.0099711	up_regulated	Ifi203
ENSMUSG00000078202	27.115	0.575356	0.488211	0.000581043	0.03436	up_regulated	Nrarp
ENSMUSG00000026921	349.062	0.556394	0.141931	8.11949e-06	0.00110848	up_regulated	Egfl7
ENSMUSG00000034059	38.9662	1.00113	0.477548	4.38038e-05	0.0045148	up_regulated	Ypel4
ENSMUSG00000068735	370.76	1.01235	0.137335	1.12804e-14	1.20635e-11	up_regulated	Trp53i11
ENSMUSG00000032864	30.2857	0.855116	0.51461	0.00011827	0.00998527	up_regulated	Rag2
ENSMUSG00000061311	135.353	0.853922	0.227181	5.96741e-06	0.000890463	up_regulated	Rag1
ENSMUSG00000040093	62.6878	1.28343	0.269145	1.34033e-08	4.00012e-06	up_regulated	Bmf
ENSMUSG00000027330	304.445	0.525057	0.144717	1.77231e-05	0.00218693	up_regulated	Cdc25b
ENSMUSG00000007659	203.561	0.536846	0.137327	8.66927e-06	0.00117108	up_regulated	Bcl2l1
ENSMUSG00000037754	73.9933	0.821187	0.250079	1.8248e-05	0.00219653	up_regulated	Ppp1r16b
ENSMUSG00000016933	107.94	0.694954	0.205027	2.11698e-05	0.00242564	up_regulated	Plcg1
ENSMUSG00000027506	183.604	0.613433	0.2169	6.81644e-05	0.00643201	up_regulated	Tpd52
ENSMUSG00000044167	289.741	0.836964	0.136279	1.0332e-10	4.73536e-08	up_regulated	Foxo1
ENSMUSG00000015745	223.893	0.871807	0.1389	3.94294e-11	2.02399e-08	up_regulated	Plekho1
ENSMUSG00000044468	93.322	0.832157	0.247649	1.52411e-05	0.00193652	up_regulated	Tent5c
ENSMUSG00000046688	257.442	0.71928	0.147712	1.61339e-07	3.50925e-05	up_regulated	Tifa
ENSMUSG00000041220	136.133	0.570946	0.268995	0.000215287	0.0156089	up_regulated	Elovl6
ENSMUSG00000027985	144.537	0.997476	0.203969	5.39643e-08	1.38505e-05	up_regulated	Lef1
ENSMUSG00000040253	206.144	0.571923	0.206302	8.06963e-05	0.00745018	up_regulated	Gbp7
ENSMUSG00000040270	116.216	1.17922	0.223504	2.54737e-09	9.08067e-07	up_regulated	Bach2
ENSMUSG00000028459	138.273	0.636337	0.224338	6.41241e-05	0.00614108	up_regulated	Cd72
ENSMUSG00000014030	278.596	0.955167	0.174291	3.17137e-09	1.09995e-06	up_regulated	Pax5
ENSMUSG00000028328	61.3559	0.961998	0.28478	9.02438e-06	0.00120635	up_regulated	Tmod1
ENSMUSG00000028434	62.2485	0.845765	0.338625	5.6295e-05	0.00551476	up_regulated	Epb41l4b
ENSMUSG00000045672	52.2931	1.95781	0.370028	8.62211e-12	4.81076e-09	up_regulated	Col27a1
ENSMUSG00000028766	68.3455	0.538183	0.422428	0.000689658	0.0383133	up_regulated	Alpl
ENSMUSG00000045349	201.868	0.542105	0.199351	9.24319e-05	0.00833832	up_regulated	Sh2d5
ENSMUSG00000096351	26.8501	0.596652	0.518762	0.000504258	0.0317213	up_regulated	Samd11
ENSMUSG00000012428	18.3491	0.532005	0.555022	0.000641555	0.0364295	up_regulated	Steap4
ENSMUSG00000029082	87.7259	0.777327	0.281862	4.98874e-05	0.00496283	up_regulated	Bst1
ENSMUSG00000029438	319.726	0.85591	0.130887	7.58108e-12	4.42218e-09	up_regulated	Bcl7a
ENSMUSG00000025608	21.5372	1.01654	0.748001	6.51309e-05	0.00619129	up_regulated	Podxl
ENSMUSG00000038871	200.128	0.771228	0.170184	6.34096e-07	0.000111471	up_regulated	Bpgm
ENSMUSG00000054435	33.1639	1.82107	0.537704	1.5411e-07	3.40981e-05	up_regulated	Gimap4
ENSMUSG00000047867	166.865	0.868529	0.178344	1.04149e-07	2.43007e-05	up_regulated	Gimap6
ENSMUSG00000090019	203.647	0.815637	0.180958	6.13908e-07	0.000109421	up_regulated	Gimap1
ENSMUSG00000025889	96.0956	0.685555	0.328317	0.000165856	0.0129782	up_regulated	Snca
ENSMUSG00000034245	59.6044	0.549526	0.362326	0.000519503	0.0322067	up_regulated	Hdac11
ENSMUSG00000015766	19.548	0.625105	0.578706	0.000395366	0.0258864	up_regulated	Eps8
ENSMUSG00000002083	58.0731	0.512447	0.375011	0.000703826	0.0389319	up_regulated	Bbc3
ENSMUSG00000003379	870.602	0.919111	0.137185	2.05064e-12	1.31579e-09	up_regulated	Cd79a
ENSMUSG00000005447	441.471	0.701332	0.146224	2.36682e-07	4.89894e-05	up_regulated	Pafah1b3
ENSMUSG00000073940	9065.32	0.993892	0.138155	4.561e-14	4.18081e-11	up_regulated	Hbb-bt
ENSMUSG00000052305	20041.8	0.779999	0.141112	4.55136e-09	1.53704e-06	up_regulated	Hbb-b1
ENSMUSG00000052305	20041.8	0.779999	0.141112	4.55136e-09	1.53704e-06	up_regulated	Hbb-bs
ENSMUSG00000108722	14.2221	0.535734	0.637276	0.000493193	0.0314883	up_regulated	Gm34225
ENSMUSG00000042978	138.207	0.790325	0.1627	1.42489e-07	3.2653e-05	up_regulated	Sbk1
ENSMUSG00000030724	391.571	0.96158	0.156768	6.71234e-11	3.31306e-08	up_regulated	Cd19
ENSMUSG00000055675	34.1785	0.747214	0.436285	0.000194318	0.0145829	up_regulated	Kbtbd11
ENSMUSG00000031766	45.9834	1.00478	0.293629	6.85814e-06	0.000969972	up_regulated	Slc12a3
ENSMUSG00000004637	73.3246	1.27122	0.226071	1.85509e-10	8.20907e-08	up_regulated	Wwox
ENSMUSG00000032187	1913.29	0.548616	0.115142	3.68593e-07	6.9561e-05	up_regulated	Smarca4
ENSMUSG00000046480	72.0476	1.25056	0.30618	2.84282e-07	5.79077e-05	up_regulated	Scn4b
ENSMUSG00000032089	44.7746	0.715023	0.360488	0.000170261	0.0132422	up_regulated	Il10ra
ENSMUSG00000066705	51.2835	0.962346	0.324552	1.83144e-05	0.00219653	up_regulated	Fxyd6
ENSMUSG00000032053	179.184	0.90504	0.174506	1.88881e-08	5.26936e-06	up_regulated	Pou2af1
ENSMUSG00000034485	42.9638	0.771148	0.368636	0.000122011	0.0102222	up_regulated	Uaca
ENSMUSG00000032411	156.882	0.692394	0.178372	6.87816e-06	0.000969972	up_regulated	Tfdp2
ENSMUSG00000053716	151.464	0.530388	0.18616	7.64362e-05	0.00710802	up_regulated	Dusp7
ENSMUSG00000038587	104.371	1.14556	0.237655	3.10259e-08	8.47139e-06	up_regulated	Akap12
ENSMUSG00000015501	44.316	0.684873	0.427266	0.000280126	0.0191216	up_regulated	Hivep2
ENSMUSG00000019849	394.506	0.505374	0.147598	2.82724e-05	0.00312775	up_regulated	Prep
ENSMUSG00000057337	73.5511	0.68408	0.323821	0.000161525	0.012785	up_regulated	Chst3
ENSMUSG00000050157	48.6618	0.944485	0.411484	4.6963e-05	0.00470841	up_regulated	Gm867
ENSMUSG00000000903	1436	0.93503	0.13144	1.06571e-13	8.54763e-11	up_regulated	Vpreb3
ENSMUSG00000034881	116.736	0.623192	0.188601	2.91605e-05	0.00319843	up_regulated	Tbxa2r
ENSMUSG00000020027	101.135	1.09912	0.261037	5.13001e-07	9.27232e-05	up_regulated	Socs2
ENSMUSG00000020183	18.2479	0.778707	0.656154	0.000176748	0.0136639	up_regulated	Cpm
ENSMUSG00000034614	179.854	0.522431	0.165915	4.63828e-05	0.00469264	up_regulated	Pik3ip1
ENSMUSG00000069919	10520	0.880921	0.12864	8.60574e-13	5.81249e-10	up_regulated	Hba-a1
ENSMUSG00000069917	5683.94	1.21457	0.134769	4.2361e-21	1.08724e-17	up_regulated	Hba-a2
ENSMUSG00000057098	333.295	0.968544	0.140914	5.0322e-13	3.79872e-10	up_regulated	Ebf1
ENSMUSG00000072893	86.7864	0.810588	0.250655	2.06772e-05	0.00239054	up_regulated	4933439C10Rik
ENSMUSG00000045667	47.6581	0.849687	0.348024	5.95176e-05	0.00578628	up_regulated	Smtnl2
ENSMUSG00000046442	23.9047	0.718517	0.518635	0.000259413	0.0179949	up_regulated	Ppm1e
ENSMUSG00000038352	315.135	1.08262	0.171817	1.25037e-11	6.68581e-09	up_regulated	Arl5c
ENSMUSG00000014195	790.561	0.530547	0.10204	4.38046e-08	1.17113e-05	up_regulated	Dnajc7
ENSMUSG00000006574	575.807	0.930686	0.164538	1.31662e-09	4.96948e-07	up_regulated	Slc4a1
ENSMUSG00000020937	12.5864	1.28986	1.19971	4.29627e-05	0.00448244	up_regulated	Plcd3
ENSMUSG00000040592	1363.51	0.914029	0.122247	7.98079e-15	9.31068e-12	up_regulated	Cd79b
ENSMUSG00000020802	197.758	0.532875	0.16649	4.15345e-05	0.00436895	up_regulated	Ube2o
ENSMUSG00000025175	47.4744	0.772657	0.371582	0.000123001	0.0102222	up_regulated	Fn3k
ENSMUSG00000020641	72.4792	0.51187	0.33297	0.000568304	0.0337641	up_regulated	Rsad2
ENSMUSG00000021127	149.832	0.52063	0.235742	0.00020951	0.0153636	up_regulated	Zfp36l1
ENSMUSG00000066363	38.4548	1.93383	0.486746	1.08765e-08	3.40435e-06	up_regulated	Serpina3f
ENSMUSG00000041481	204.147	0.504641	0.178666	8.27594e-05	0.00758609	up_regulated	Serpina3g
ENSMUSG00000021262	122.376	0.600994	0.238719	0.00011317	0.00974707	up_regulated	Evl
ENSMUSG00000091402	17.0607	0.576685	0.626416	0.00043506	0.0280559	up_regulated	Rd3l
ENSMUSG00000103168	30.0241	1.07811	0.443829	2.19361e-05	0.0024912	up_regulated	Gm30948
ENSMUSG00000095105	46.4304	1.28495	0.402698	2.49478e-06	0.000395254	up_regulated	Edaradd
ENSMUSG00000076431	496.114	0.553707	0.119616	6.70736e-07	0.000114767	up_regulated	Sox4
ENSMUSG00000021356	100.378	1.0313	0.203184	1.82674e-08	5.20946e-06	up_regulated	Irf4
ENSMUSG00000025867	512.771	0.63325	0.14265	1.25957e-06	0.000207329	up_regulated	Cplx2
ENSMUSG00000021680	35.7665	3.41389	0.499046	6.28592e-13	4.48151e-10	up_regulated	Crhbp
ENSMUSG00000021792	115.245	0.562677	0.282897	0.000265509	0.0183187	up_regulated	Prxl2a
ENSMUSG00000037580	76.0434	0.611441	0.29323	0.000206061	0.0151976	up_regulated	Gch1
ENSMUSG00000034248	239.404	0.717968	0.154916	4.70887e-07	8.69882e-05	up_regulated	Slc25a37
ENSMUSG00000003882	43.9716	0.853143	0.455929	0.00010527	0.00925298	up_regulated	Il7r
ENSMUSG00000059895	1244.6	0.533803	0.0965549	7.13136e-09	2.34658e-06	up_regulated	Ptp4a3
ENSMUSG00000068600	18.21	0.826839	0.750379	0.000137601	0.0111762	up_regulated	Gml2
ENSMUSG00000091694	39.9727	1.5109	0.428641	2.9709e-07	5.86546e-05	up_regulated	Apol11b
ENSMUSG00000056656	54.714	0.575875	0.415704	0.00053657	0.0329394	up_regulated	Apol8
ENSMUSG00000022471	376.884	0.534884	0.144678	1.48676e-05	0.00190796	up_regulated	Xrcc6
ENSMUSG00000037972	147.142	0.790453	0.169961	3.63501e-07	6.9561e-05	up_regulated	Snn
ENSMUSG00000075370	2590.04	0.61556	0.120666	6.23385e-08	1.56861e-05	up_regulated	Igll1
ENSMUSG00000059305	2158.03	0.68552	0.126915	1.12015e-08	3.4226e-06	up_regulated	Vpreb1a
ENSMUSG00000059280	424.835	1.17952	0.148558	5.18318e-17	8.31447e-14	up_regulated	Vpreb1b
ENSMUSG00000022885	55.6837	0.75521	0.323123	9.6025e-05	0.00855757	up_regulated	St6gal1
ENSMUSG00000046546	87.2961	0.809366	0.214625	6.69511e-06	0.000965374	up_regulated	Fam43a
ENSMUSG00000024334	75.986	0.577032	0.275298	0.000220591	0.0158148	up_regulated	H2-Oa
ENSMUSG00000041538	72.8565	0.611655	0.311559	0.000243075	0.0171395	up_regulated	H2-Ob
ENSMUSG00000073400	122.695	0.806969	0.307258	5.463e-05	0.00539283	up_regulated	Trim10
ENSMUSG00000053477	286.171	0.571914	0.143591	6.61806e-06	0.000965109	up_regulated	Tcf4
ENSMUSG00000083282	38.416	0.794546	0.442217	0.000146574	0.0117561	up_regulated	Ctsf
ENSMUSG00000024776	68.1851	0.642233	0.301842	0.000179118	0.0136823	up_regulated	Stambpl1
ENSMUSG00000061132	328.28	0.902692	0.153435	3.94005e-10	1.68542e-07	up_regulated	Blnk
ENSMUSG00000025014	862.062	0.538066	0.157658	2.74229e-05	0.00306016	up_regulated	Dntt
ENSMUSG00000024978	115.38	0.721313	0.213917	2.05562e-05	0.00239054	up_regulated	Gpam
ENSMUSG00000025085	149.502	1.08348	0.180651	8.16022e-11	3.87852e-08	up_regulated	Ablim1
ENSMUSG00000025089	61.6346	0.63616	0.310272	0.000202092	0.014991	up_regulated	Gfra1
ENSMUSG00000025270	470.224	1.19246	0.161762	3.80475e-15	4.88264e-12	up_regulated	Alas2
ENSMUSG00000055013	241.611	-0.715954	0.121334	6.0336e-10	2.41966e-07	down_regulated	Agap1
ENSMUSG00000092572	18.0336	-0.876166	0.555509	0.000109928	0.00959667	down_regulated	Serpinb10
ENSMUSG00000064246	1152.22	-0.543903	0.137693	7.64772e-06	0.0010553	down_regulated	Chi3l1
ENSMUSG00000026822	26912.9	-0.550394	0.150187	1.56084e-05	0.00196375	down_regulated	Lcn2
ENSMUSG00000033213	232.102	-0.637613	0.198563	3.3728e-05	0.00360693	down_regulated	AA467197
ENSMUSG00000017737	1261.02	-0.628406	0.141486	1.26016e-06	0.000207329	down_regulated	Mmp9
ENSMUSG00000040209	111.604	-1.84433	0.178505	9.27662e-30	5.95234e-26	down_regulated	Zfp704
ENSMUSG00000056054	31380	-0.544818	0.152579	1.9472e-05	0.00229251	down_regulated	S100a8
ENSMUSG00000040809	7587.41	-0.523558	0.103276	8.762e-08	2.12156e-05	down_regulated	Chil3
ENSMUSG00000028184	16.6556	-1.39609	0.53938	4.60265e-06	0.000711636	down_regulated	Adgrl2
ENSMUSG00000028528	9.48407	-2.90796	0.906879	4.74493e-07	8.69882e-05	down_regulated	Dnajc6
ENSMUSG00000028552	116.815	-0.598513	0.177023	2.63161e-05	0.00296241	down_regulated	Eps15
ENSMUSG00000028795	179.299	-0.621251	0.145003	2.29685e-06	0.000368443	down_regulated	Ccdc28b
ENSMUSG00000028860	45.3779	-3.29489	0.304968	5.79681e-28	2.47968e-24	down_regulated	Sytl1
ENSMUSG00000037379	36.1018	-0.698347	0.506353	0.000290097	0.0196974	down_regulated	Spon2
ENSMUSG00000029705	492.72	-0.864776	0.0936774	3.5752e-21	1.08724e-17	down_regulated	Cux1
ENSMUSG00000056493	78.9358	-0.541526	0.285152	0.000316821	0.0212868	down_regulated	Foxk1
ENSMUSG00000056643	98.0736	-0.5837	0.240529	0.000134327	0.0109856	down_regulated	Chst13
ENSMUSG00000030214	915.503	-0.503524	0.101639	1.64601e-07	3.52055e-05	down_regulated	Plbd1
ENSMUSG00000025584	17.2123	-4.30606	0.605012	7.4383e-14	6.36371e-11	down_regulated	Pde8a
ENSMUSG00000031497	78.9426	-0.551585	0.284894	0.000293672	0.0198352	down_regulated	Tnfsf13b
ENSMUSG00000031864	55.9981	-0.569237	0.332337	0.000381666	0.0251175	down_regulated	Ints10
ENSMUSG00000013033	52.6781	-2.77562	0.346304	2.38037e-17	4.3639e-14	down_regulated	Adgrl1
ENSMUSG00000041949	104.948	-0.664662	0.18764	1.65241e-05	0.00205877	down_regulated	Tango6
ENSMUSG00000005800	460.184	-0.591039	0.394813	0.000456195	0.0292718	down_regulated	Mmp8
ENSMUSG00000039542	151.642	-4.73006	0.262152	4.7999e-74	6.15972e-70	down_regulated	Ncam1
ENSMUSG00000037493	115.214	-0.571769	0.241094	0.000149344	0.011904	down_regulated	Cib2
ENSMUSG00000032484	32825.4	-0.65435	0.147059	1.15962e-06	0.000195807	down_regulated	Ngp
ENSMUSG00000032496	16565.2	-0.61629	0.119698	4.87276e-08	1.27617e-05	down_regulated	Ltf
ENSMUSG00000039910	684.017	-0.753889	0.129829	9.76122e-10	3.79593e-07	down_regulated	Cited2
ENSMUSG00000034917	22.5257	-2.60252	0.436748	4.61441e-12	2.81985e-09	down_regulated	Tjp3
ENSMUSG00000069516	16294.6	-0.563845	0.117354	2.96672e-07	5.86546e-05	down_regulated	Lyz2
ENSMUSG00000025574	933.299	-0.96469	0.111828	5.57717e-19	1.19286e-15	down_regulated	Tk1
ENSMUSG00000041324	474.565	-0.595854	0.162284	1.41601e-05	0.00183552	down_regulated	Inhba
ENSMUSG00000063458	31.8093	-3.44948	0.440405	5.75416e-16	8.20479e-13	down_regulated	Lrmda
ENSMUSG00000034522	57.725	-0.51419	0.3478	0.000610398	0.0354445	down_regulated	Zfp395
ENSMUSG00000022186	245.636	-0.941208	0.129412	3.26068e-14	3.2188e-11	down_regulated	Oxct1
ENSMUSG00000022582	708.563	-0.513799	0.196625	0.000114316	0.00978013	down_regulated	Ly6g
ENSMUSG00000056399	147.252	-1.22196	0.22033	4.28976e-10	1.77582e-07	down_regulated	Prss34
ENSMUSG00000031391	15.915	-0.551431	0.530069	0.000623919	0.0359047	down_regulated	L1cam
ENSMUSG00000032750	35.4137	-1.8736	0.555948	1.51724e-07	3.40981e-05	down_regulated	Gab3
ENSMUSG00000032750	35.4137	-1.8736	0.555948	1.51724e-07	3.40981e-05	down_regulated	Gm38425
ENSMUSG00000031310	78.8412	-1.08591	0.200681	2.31828e-09	8.50015e-07	down_regulated	Zmym3
ENSMUSG00000096768	1151.71	-0.534167	0.0992597	1.62228e-08	4.73154e-06	down_regulated	Erdr1x

## Sheet: Table S2
Table S2: Gene Expression cKit-
gene_id	baseMean	log2FoldChange	lfcSE	pvalue	padj	status	gene_name
ENSMUSG00000026155	830.387	0.55787	0.0993134	4.26479e-09	8.9362e-07	up_regulated	Smap1
ENSMUSG00000026028	736.858	0.523616	0.107224	1.47285e-07	1.81666e-05	up_regulated	Trak2
ENSMUSG00000026203	388.871	0.844545	0.127737	1.17799e-12	1.0308e-09	up_regulated	Dnajb2
ENSMUSG00000073643	109.629	1.07334	0.167287	1.44518e-13	1.95147e-10	up_regulated	Wdfy1
ENSMUSG00000026348	33.1826	0.619817	0.326915	0.000220074	0.00825483	up_regulated	Acmsd
ENSMUSG00000016526	137.24	0.714448	0.205835	9.38795e-06	0.000597339	up_regulated	Dyrk3
ENSMUSG00000023150	147.196	0.571339	0.151296	7.05429e-06	0.000478877	up_regulated	Ivns1abp
ENSMUSG00000026473	282.721	0.678534	0.139452	1.11808e-07	1.44553e-05	up_regulated	Glul
ENSMUSG00000044708	16.4778	0.534399	0.487253	0.000534639	0.0172805	up_regulated	Kcnj10
ENSMUSG00000026938	276.665	0.95029	0.169435	1.32059e-10	4.33759e-08	up_regulated	Fcna
ENSMUSG00000036352	1346.92	0.51044	0.122542	2.06512e-06	0.000174287	up_regulated	Ubac1
ENSMUSG00000034059	353.97	0.785573	0.14127	1.40988e-09	3.56964e-07	up_regulated	Ypel4
ENSMUSG00000027078	1035.86	0.834299	0.278322	1.1184e-05	0.000689944	up_regulated	Ube2l6
ENSMUSG00000027187	594.04	0.810564	0.138828	2.21798e-10	6.54628e-08	up_regulated	Cat
ENSMUSG00000023572	347.966	0.729669	0.141778	2.08366e-08	3.37636e-06	up_regulated	Ccndbp1
ENSMUSG00000023216	154.828	0.6448	0.186631	1.35336e-05	0.000814228	up_regulated	Epb42
ENSMUSG00000027330	827.049	0.588962	0.113703	3.7622e-08	5.57585e-06	up_regulated	Cdc25b
ENSMUSG00000027333	707.903	0.884959	0.142136	8.43825e-12	4.66136e-09	up_regulated	Smox
ENSMUSG00000032869	543.828	0.545769	0.135769	3.48377e-06	0.000271399	up_regulated	Psmf1
ENSMUSG00000007659	799.437	0.573978	0.148623	5.54881e-06	0.0004038	up_regulated	Bcl2l1
ENSMUSG00000027487	41.5888	0.657771	0.265679	8.26038e-05	0.00362413	up_regulated	Cdk5rap1
ENSMUSG00000001403	2234.03	0.53517	0.10358	4.21203e-08	6.09391e-06	up_regulated	Ube2c
ENSMUSG00000027495	604.341	0.627863	0.144586	1.11746e-06	0.000104466	up_regulated	Fam210b
ENSMUSG00000062515	76.4132	0.753188	0.183237	1.25798e-06	0.00011495	up_regulated	Fabp4
ENSMUSG00000027562	3682.23	0.545579	0.228209	0.00015559	0.00630295	up_regulated	Car2
ENSMUSG00000041842	312.145	0.827763	0.146801	5.74365e-10	1.58642e-07	up_regulated	Fhdc1
ENSMUSG00000015854	69.1987	0.986016	0.208129	7.56413e-09	1.4227e-06	up_regulated	Cd5l
ENSMUSG00000044468	996.207	0.78308	0.459207	9.36837e-05	0.00408078	up_regulated	Tent5c
ENSMUSG00000027860	108.954	0.765018	0.21765	6.13171e-06	0.000433801	up_regulated	Vangl1
ENSMUSG00000027962	106.917	0.724199	0.177761	1.72849e-06	0.000147932	up_regulated	Vcam1
ENSMUSG00000028124	585.001	0.622427	0.132605	2.99644e-07	3.2807e-05	up_regulated	Gclm
ENSMUSG00000028436	625.989	0.782952	0.13156	1.52876e-10	4.88921e-08	up_regulated	Dcaf12
ENSMUSG00000036002	500.102	0.740777	0.120852	7.71465e-11	2.84109e-08	up_regulated	Atosb
ENSMUSG00000045973	875.299	0.532868	0.120657	9.27208e-07	8.87273e-05	up_regulated	Slc25a51
ENSMUSG00000028328	491.243	0.65652	0.250444	6.60895e-05	0.0030656	up_regulated	Tmod1
ENSMUSG00000028331	43.6406	0.512006	0.277486	0.000437059	0.0145523	up_regulated	Trmo
ENSMUSG00000028332	884.692	0.69206	0.139804	7.01617e-08	9.37006e-06	up_regulated	Hemgn
ENSMUSG00000028496	149.767	0.544021	0.160862	1.95512e-05	0.00111024	up_regulated	Mllt3
ENSMUSG00000028684	1974.56	0.681051	0.127918	1.20422e-08	2.0907e-06	up_regulated	Urod
ENSMUSG00000028542	493.92	0.861213	0.232602	1.72253e-06	0.000147932	up_regulated	Slc6a9
ENSMUSG00000028539	10.9713	0.898756	0.681168	8.2226e-05	0.00362063	up_regulated	Artn
ENSMUSG00000040859	370.692	0.619053	0.154408	3.3731e-06	0.000264473	up_regulated	Bsdc1
ENSMUSG00000028776	358.579	0.501704	0.0976533	4.51906e-08	6.31266e-06	up_regulated	Tinagl1
ENSMUSG00000025743	276.497	0.540673	0.142153	6.5226e-06	0.00045557	up_regulated	Sdc3
ENSMUSG00000028906	1627.26	0.628564	0.344887	0.000223072	0.00829049	up_regulated	Epb41
ENSMUSG00000028825	1886.01	0.632641	0.123282	4.09542e-08	5.99659e-06	up_regulated	Rhd
ENSMUSG00000036905	363.97	0.93774	0.152821	6.96295e-12	4.02956e-09	up_regulated	C1qb
ENSMUSG00000036896	475.3	0.915452	0.144516	2.77179e-12	1.9815e-09	up_regulated	C1qc
ENSMUSG00000036887	487.876	0.831514	0.149181	7.89846e-10	2.13311e-07	up_regulated	C1qa
ENSMUSG00000058183	12.6803	1.40297	0.68175	7.91863e-06	0.000525875	up_regulated	Mmel1
ENSMUSG00000096351	189.918	0.535958	0.222703	0.000155411	0.00630295	up_regulated	Samd11
ENSMUSG00000002944	45.2649	0.501858	0.29775	0.000571816	0.0181508	up_regulated	Cd36
ENSMUSG00000014956	606.077	0.632782	0.117298	1.09225e-08	1.95208e-06	up_regulated	Ppp1cb
ENSMUSG00000043510	155.715	0.58793	0.167835	1.40383e-05	0.00084043	up_regulated	Hscb
ENSMUSG00000041740	1198.66	0.522233	0.112081	3.66066e-07	3.90246e-05	up_regulated	Rnf10
ENSMUSG00000042744	298.525	0.517456	0.137412	7.02224e-06	0.000478877	up_regulated	Hectd4
ENSMUSG00000008843	1178.93	0.587363	0.119807	1.35245e-07	1.71212e-05	up_regulated	Cldn13
ENSMUSG00000040557	187.091	1.21489	0.167189	5.4791e-17	9.5125e-14	up_regulated	Mettl27
ENSMUSG00000118332	55.0947	1.3523	0.350932	2.77442e-08	4.26805e-06	up_regulated	Fam220a
ENSMUSG00000118332	55.0947	1.3523	0.350932	2.77442e-08	4.26805e-06	up_regulated	Sagsin1
ENSMUSG00000075569	9.25447	1.76819	0.916185	7.09471e-06	0.000478877	up_regulated	Pms2
ENSMUSG00000001763	1311.05	0.679837	0.124333	5.68827e-09	1.13327e-06	up_regulated	Tspan33
ENSMUSG00000038871	1827.56	0.918965	0.517091	4.51071e-05	0.00224667	up_regulated	Bpgm
ENSMUSG00000073155	1198.38	0.518043	0.114926	6.45105e-07	6.4262e-05	up_regulated	Stmp1
ENSMUSG00000029922	2797.24	0.71368	0.305381	7.18628e-05	0.00327097	up_regulated	Mkrn1
ENSMUSG00000029866	475.225	0.642408	0.140807	4.72108e-07	4.90387e-05	up_regulated	Kel
ENSMUSG00000029780	400.935	0.676497	0.133528	4.47488e-08	6.31266e-06	up_regulated	Nt5c3
ENSMUSG00000037788	174.598	0.505708	0.14763	1.70242e-05	0.000985214	up_regulated	Vopp1
ENSMUSG00000029802	135.109	0.589797	0.14768	3.72944e-06	0.000288687	up_regulated	Abcg2
ENSMUSG00000025889	904.767	1.30388	0.35305	6.32204e-08	8.53686e-06	up_regulated	Snca
ENSMUSG00000030000	591.384	0.500724	0.175348	6.52703e-05	0.00304644	up_regulated	Add2
ENSMUSG00000029994	53.8372	0.523137	0.260678	0.00032472	0.0114719	up_regulated	Anxa4
ENSMUSG00000030084	52.6734	0.601527	0.241221	0.000105939	0.00453335	up_regulated	Plxna1
ENSMUSG00000034245	68.8099	0.522126	0.219448	0.000169443	0.0067516	up_regulated	Hdac11
ENSMUSG00000025702	318.518	0.682147	0.13214	2.71037e-08	4.22296e-06	up_regulated	Marchf8
ENSMUSG00000030217	70.5601	0.553127	0.283688	0.000306799	0.0108703	up_regulated	Art4
ENSMUSG00000030282	566.327	0.742219	0.139945	8.44708e-09	1.55542e-06	up_regulated	Cmas
ENSMUSG00000002985	1372.92	0.694589	0.100267	5.8036e-13	6.41192e-10	up_regulated	Apoe
ENSMUSG00000002602	146.954	0.810529	0.147383	1.51349e-09	3.75377e-07	up_regulated	Axl
ENSMUSG00000003363	466.969	0.558765	0.1041	1.57217e-08	2.61734e-06	up_regulated	Pld3
ENSMUSG00000040435	890.86	0.669323	0.270103	7.71537e-05	0.00347116	up_regulated	Ppp1r15a
ENSMUSG00000039236	2369.55	0.558257	0.269266	0.000250575	0.00914487	up_regulated	Isg20
ENSMUSG00000073940	40757.3	0.592113	0.0878803	3.95229e-12	2.40161e-09	up_regulated	Hbb-bt
ENSMUSG00000052305	69672.4	0.519706	0.0834419	1.30331e-10	4.33759e-08	up_regulated	Hbb-b1
ENSMUSG00000052305	69672.4	0.519706	0.0834419	1.30331e-10	4.33759e-08	up_regulated	Hbb-bs
ENSMUSG00000034825	11.8875	1.18992	0.709015	2.32026e-05	0.00127019	up_regulated	Nrip3
ENSMUSG00000030878	395.605	0.613186	0.3183	0.000222303	0.00828726	up_regulated	Cdr2
ENSMUSG00000025495	671.979	0.526457	0.129561	2.96877e-06	0.00024053	up_regulated	Ptdss2
ENSMUSG00000037887	100.294	1.10049	0.187672	3.31722e-12	2.1218e-09	up_regulated	Dusp8
ENSMUSG00000031543	715.611	0.585965	0.142836	2.68829e-06	0.000220749	up_regulated	Ank1
ENSMUSG00000031613	17.697	0.849411	0.512421	7.04272e-05	0.00321768	up_regulated	Hpgd
ENSMUSG00000005413	660.259	0.685253	0.123879	3.88564e-09	8.3233e-07	up_regulated	Hmox1
ENSMUSG00000051839	485.812	0.705552	0.266137	4.78124e-05	0.00235274	up_regulated	Gypa
ENSMUSG00000003813	2022.87	0.703953	0.129368	5.54438e-09	1.12301e-06	up_regulated	Rad23a
ENSMUSG00000054191	1741.6	0.569416	0.127756	8.20113e-07	8.03777e-05	up_regulated	Klf1
ENSMUSG00000005161	7301.62	0.573647	0.103554	6.27259e-09	1.22953e-06	up_regulated	Prdx2
ENSMUSG00000037415	926.486	0.755704	0.121626	4.00849e-11	1.61831e-08	up_regulated	Ranbp10
ENSMUSG00000078143	11.7328	0.695521	0.60125	0.000206841	0.00785544	up_regulated	Gm17344
ENSMUSG00000031950	197.931	0.755683	0.148213	2.1164e-08	3.3843e-06	up_regulated	Gabarapl2
ENSMUSG00000004637	40.8111	1.45825	0.323518	1.11256e-09	2.93932e-07	up_regulated	Wwox
ENSMUSG00000001014	552.207	0.62386	0.142412	9.87775e-07	9.30576e-05	up_regulated	Icam4
ENSMUSG00000006235	408.199	0.542118	0.156581	1.60575e-05	0.000938205	up_regulated	Epor
ENSMUSG00000059495	129.198	0.664595	0.191358	1.19963e-05	0.000732617	up_regulated	Arhgef12
ENSMUSG00000032126	2740.97	0.632175	0.121962	3.19107e-08	4.84764e-06	up_regulated	Hmbs
ENSMUSG00000032028	196.502	0.627106	0.168113	7.24026e-06	0.000483466	up_regulated	Nxpe2
ENSMUSG00000074269	32.4708	0.67805	0.376129	0.000163137	0.00658672	up_regulated	Rec114
ENSMUSG00000039452	172.443	0.737519	0.163248	3.26269e-07	3.50898e-05	up_regulated	Snx22
ENSMUSG00000032411	469.729	0.888561	0.148418	3.4938e-11	1.46414e-08	up_regulated	Tfdp2
ENSMUSG00000041528	643.792	0.613403	0.137603	7.68106e-07	7.58926e-05	up_regulated	Rnf123
ENSMUSG00000043953	48.4778	0.583039	0.273037	0.000202536	0.00775108	up_regulated	Ccrl2
ENSMUSG00000059554	69.0015	0.574223	0.198488	5.54508e-05	0.00266054	up_regulated	Ccdc28a
ENSMUSG00000047139	5753.36	0.511595	0.0874516	1.20308e-09	3.11085e-07	up_regulated	Cd24a
ENSMUSG00000001663	80.2257	0.972998	0.240629	1.76593e-07	2.12034e-05	up_regulated	Gstt1
ENSMUSG00000009092	41.9461	0.870416	0.281428	7.07125e-06	0.000478877	up_regulated	Derl3
ENSMUSG00000050157	280.51	0.89394	0.138071	1.5239e-12	1.20005e-09	up_regulated	Gm867
ENSMUSG00000035504	84.7726	0.669262	0.187815	9.48258e-06	0.000600218	up_regulated	Reep6
ENSMUSG00000020235	1097.86	0.634637	0.0982381	2.02144e-11	9.09872e-09	up_regulated	Fzr1
ENSMUSG00000020053	59.1046	0.646338	0.233622	5.43288e-05	0.00263051	up_regulated	Igf1
ENSMUSG00000020027	58.4617	0.640223	0.218444	4.13705e-05	0.0020949	up_regulated	Socs2
ENSMUSG00000034127	63.8394	0.840014	0.203627	5.57693e-07	5.69549e-05	up_regulated	Tspan8
ENSMUSG00000025400	111.829	0.559686	0.199445	6.81587e-05	0.00314955	up_regulated	Tac2
ENSMUSG00000041073	30.3824	0.938314	0.35109	1.01283e-05	0.000631229	up_regulated	Nacad
ENSMUSG00000069919	43102.2	0.600378	0.0874454	1.57992e-12	1.20005e-09	up_regulated	Hba-a1
ENSMUSG00000073063	185.897	1.08666	0.177819	8.58942e-13	8.69893e-10	up_regulated	Hbq1b
ENSMUSG00000069917	31655.8	0.776304	0.122593	1.55035e-11	7.8506e-09	up_regulated	Hba-a2
ENSMUSG00000020390	723.859	0.5312	0.128437	2.38263e-06	0.000197104	up_regulated	Ube2b
ENSMUSG00000044352	132.709	0.716192	0.188927	4.16522e-06	0.000316375	up_regulated	Sowaha
ENSMUSG00000020490	294.272	0.709336	0.135926	1.69952e-08	2.79112e-06	up_regulated	Btnl10
ENSMUSG00000056895	89.3216	1.21772	0.226634	1.80913e-11	8.79456e-09	up_regulated	H2bc27
ENSMUSG00000042331	361.404	0.781689	0.161698	5.80739e-08	7.93002e-06	up_regulated	Specc1
ENSMUSG00000018566	112.207	0.709443	0.181952	3.20125e-06	0.000252705	up_regulated	Slc2a4
ENSMUSG00000069814	85.6976	1.04741	0.235227	1.33253e-08	2.28087e-06	up_regulated	Ccdc92b
ENSMUSG00000034449	392.406	0.755817	0.145755	1.37128e-08	2.31461e-06	up_regulated	Dhrs11
ENSMUSG00000020525	142.339	0.594557	0.15268	4.95516e-06	0.000367196	up_regulated	Ppm1d
ENSMUSG00000018659	477.366	1.00403	0.160483	1.18746e-12	1.0308e-09	up_regulated	Pnpo
ENSMUSG00000078652	885.881	0.595443	0.119048	8.53789e-08	1.12784e-05	up_regulated	Psme3
ENSMUSG00000017314	93.3999	1.19461	0.218685	1.29336e-11	6.83399e-09	up_regulated	Mpp2
ENSMUSG00000006574	4717.28	0.703787	0.12418	1.60225e-09	3.81336e-07	up_regulated	Slc4a1
ENSMUSG00000018677	1628.96	0.994597	0.214827	1.12477e-08	1.98106e-06	up_regulated	Slc25a39
ENSMUSG00000020937	31.5701	1.6137	0.379572	5.15244e-09	1.06132e-06	up_regulated	Plcd3
ENSMUSG00000025175	317.462	0.547509	0.192941	6.54258e-05	0.00304644	up_regulated	Fn3k
ENSMUSG00000021061	1537.86	0.639707	0.125289	4.49317e-08	6.31266e-06	up_regulated	Sptb
ENSMUSG00000021118	51.5449	1.42548	0.281156	5.36587e-11	2.03786e-08	up_regulated	Plek2
ENSMUSG00000021190	116.039	0.584263	0.158247	8.73887e-06	0.000564912	up_regulated	Lgmn
ENSMUSG00000018102	490.704	0.599117	0.105438	2.66962e-09	6.00813e-07	up_regulated	H2bc4
ENSMUSG00000044792	166.009	0.813795	0.181605	1.91798e-07	2.24127e-05	up_regulated	Isca1
ENSMUSG00000041028	485.678	0.583857	0.12396	3.06261e-07	3.3232e-05	up_regulated	Ghitm
ENSMUSG00000021792	557.85	0.948751	0.42166	1.99001e-05	0.00111024	up_regulated	Prxl2a
ENSMUSG00000072589	43.4455	1.61597	0.303018	2.19038e-11	9.50702e-09	up_regulated	Gm10371
ENSMUSG00000037580	405.561	1.02014	0.168006	2.94926e-12	1.99124e-09	up_regulated	Gch1
ENSMUSG00000068417	144.726	0.574007	0.181422	3.14184e-05	0.00165293	up_regulated	Pnp2
ENSMUSG00000022051	406.174	0.688123	0.147162	2.39504e-07	2.69508e-05	up_regulated	Bnip3l
ENSMUSG00000034248	1289.47	0.8831	0.230939	9.74911e-07	9.25632e-05	up_regulated	Slc25a37
ENSMUSG00000022265	122.782	0.641457	0.175057	8.21773e-06	0.000542772	up_regulated	Ank
ENSMUSG00000075602	276.575	0.545434	0.139039	4.65063e-06	0.000351051	up_regulated	Ly6a
ENSMUSG00000091650	27.0461	0.705718	0.389386	0.000135155	0.00564445	up_regulated	Apol11a
ENSMUSG00000091694	494.509	1.25267	0.441086	1.5532e-06	0.000134829	up_regulated	Apol11b
ENSMUSG00000056656	241.585	0.847737	0.167023	8.97335e-09	1.62766e-06	up_regulated	Apol8
ENSMUSG00000096210	296.192	0.5746	0.120143	2.29781e-07	2.63446e-05	up_regulated	H1f0
ENSMUSG00000042351	105.264	0.50995	0.180669	7.00965e-05	0.00321465	up_regulated	Grap2
ENSMUSG00000081534	1046.54	0.510334	0.104675	1.47489e-07	1.81666e-05	up_regulated	Slc48a1
ENSMUSG00000023055	140.999	0.605991	0.145996	2.23937e-06	0.00018769	up_regulated	Calcoco1
ENSMUSG00000075704	481.743	0.641836	0.124855	3.7622e-08	5.57585e-06	up_regulated	Txnrd2
ENSMUSG00000022849	97.7135	0.588128	0.169824	1.54569e-05	0.000916331	up_regulated	Hspbap1
ENSMUSG00000071562	21.7114	1.08988	0.415001	4.94015e-06	0.000367196	up_regulated	Stfa1
ENSMUSG00000084866	39.2543	0.621124	0.280184	0.000147439	0.0060331	up_regulated	A930006K02Rik
ENSMUSG00000022957	220.049	0.639863	0.142305	6.13533e-07	6.21355e-05	up_regulated	Itsn1
ENSMUSG00000024158	1418.26	0.861664	0.124242	1.04232e-13	1.58341e-10	up_regulated	Hagh
ENSMUSG00000063952	420.232	0.533774	0.168748	3.27308e-05	0.0016999	up_regulated	Brpf3
ENSMUSG00000117534	62.9131	0.729618	0.219567	1.19414e-05	0.000732617	up_regulated	Gm20161
ENSMUSG00000079557	1292.69	0.581306	0.232927	0.000114461	0.00485178	up_regulated	Marchf2
ENSMUSG00000073400	844.707	0.767203	0.309107	4.16614e-05	0.00210087	up_regulated	Trim10
ENSMUSG00000035186	18.8806	1.54759	0.506223	5.3208e-07	5.47997e-05	up_regulated	Ubd
ENSMUSG00000023995	953.758	0.782816	0.130339	1.10237e-10	3.82774e-08	up_regulated	Tspo2
ENSMUSG00000024206	155.789	0.540999	0.165279	2.53305e-05	0.00136382	up_regulated	Rfx2
ENSMUSG00000039770	323.223	0.69988	0.111398	4.128e-11	1.61831e-08	up_regulated	Ypel5
ENSMUSG00000024072	169.916	0.695237	0.146802	1.7827e-07	2.12034e-05	up_regulated	Yipf4
ENSMUSG00000051439	42.2455	0.980719	0.246281	2.04531e-07	2.3673e-05	up_regulated	Cd14
ENSMUSG00000024588	1589.68	0.905185	0.211239	1.51642e-07	1.84291e-05	up_regulated	Fech
ENSMUSG00000024533	173.478	0.640647	0.188647	1.57347e-05	0.000928271	up_regulated	Spire1
ENSMUSG00000024892	108.907	0.948877	0.184102	1.58405e-09	3.81336e-07	up_regulated	Pcx
ENSMUSG00000083282	165.104	1.82664	0.18805	7.77014e-25	3.14769e-21	up_regulated	Ctsf
ENSMUSG00000024787	245.173	0.735596	0.133467	2.95491e-09	6.52928e-07	up_regulated	Snx15
ENSMUSG00000060675	1236.31	0.568721	0.246432	0.000165345	0.00665376	up_regulated	Plaat3
ENSMUSG00000024663	416.774	0.609895	0.150619	3.05074e-06	0.000243919	up_regulated	Rab3il1
ENSMUSG00000024672	31.1057	0.747231	0.355631	7.74899e-05	0.00347116	up_regulated	Ms4a7
ENSMUSG00000023307	482.343	0.536348	0.116387	4.58046e-07	4.84055e-05	up_regulated	Marchf5
ENSMUSG00000025270	4988.26	0.873991	0.26085	3.86272e-06	0.000297111	up_regulated	Alas2
ENSMUSG00000026090	7.56683	-1.12755	1.01365	5.54e-05	0.00266054	down_regulated	Cracdl
ENSMUSG00000027297	14.4064	-0.590132	0.494007	0.000374627	0.0128249	down_regulated	Ltk
ENSMUSG00000027398	183.586	-0.522856	0.189542	7.96144e-05	0.00354415	down_regulated	Il1b
ENSMUSG00000040209	42.8512	-2.27714	0.28231	1.89254e-17	3.83334e-14	down_regulated	Zfp704
ENSMUSG00000061143	28.0949	-1.64909	0.364806	1.63165e-09	3.81336e-07	down_regulated	Maml3
ENSMUSG00000028552	120.255	-0.652098	0.137949	2.3315e-07	2.6481e-05	down_regulated	Eps15
ENSMUSG00000028860	29.9723	-2.923	0.34889	3.62425e-18	8.8091e-15	down_regulated	Sytl1
ENSMUSG00000029705	478.792	-0.931327	0.0917046	3.54343e-26	2.15316e-22	down_regulated	Cux1
ENSMUSG00000056493	80.3753	-0.722314	0.186538	3.20221e-06	0.000252705	down_regulated	Foxk1
ENSMUSG00000029993	302.464	-0.524645	0.110654	2.65833e-07	2.93698e-05	down_regulated	Nfu1
ENSMUSG00000015053	73.4801	-0.637909	0.216996	4.10753e-05	0.00208865	down_regulated	Gata2
ENSMUSG00000025584	11.9295	-3.0376	0.609587	6.85695e-09	1.32274e-06	down_regulated	Pde8a
ENSMUSG00000025133	84.3895	-0.671481	0.16526	2.38412e-06	0.000197104	down_regulated	Ints4
ENSMUSG00000052749	104.663	-0.632891	0.155916	2.79079e-06	0.000227627	down_regulated	Trim30b
ENSMUSG00000052749	104.663	-0.632891	0.155916	2.79079e-06	0.000227627	down_regulated	Gm38525
ENSMUSG00000031864	31.3943	-1.27408	0.32237	2.24394e-08	3.54163e-06	down_regulated	Ints10
ENSMUSG00000013033	43.2456	-1.05637	0.273361	1.47987e-07	1.81666e-05	down_regulated	Adgrl1
ENSMUSG00000014846	90.8386	-0.512575	0.220168	0.000190922	0.00743676	down_regulated	Tppp3
ENSMUSG00000039542	74.2404	-3.11816	0.24343	1.17644e-38	1.42972e-34	down_regulated	Ncam1
ENSMUSG00000042757	40.1529	-0.821924	0.246215	6.04172e-06	0.000433801	down_regulated	Tmem108
ENSMUSG00000039910	331.955	-0.683347	0.113374	2.26235e-10	6.54628e-08	down_regulated	Cited2
ENSMUSG00000034917	21.0438	-2.96848	0.43768	5.6968e-13	6.41192e-10	down_regulated	Tjp3
ENSMUSG00000019312	13.6722	-0.903655	0.564499	5.95707e-05	0.00282798	down_regulated	Grb7
ENSMUSG00000020681	121.865	-0.79918	0.153169	7.60925e-09	1.4227e-06	down_regulated	Ace
ENSMUSG00000023132	64.9236	-0.544072	0.220579	0.000136046	0.00566222	down_regulated	Gzma
ENSMUSG00000063458	15.0187	-3.62705	0.618079	8.08171e-11	2.88874e-08	down_regulated	Lrmda
ENSMUSG00000007817	252.798	-0.617157	0.110203	3.9038e-09	8.3233e-07	down_regulated	Zmiz1
ENSMUSG00000022157	674.966	-1.24808	0.253602	1.91505e-10	5.9676e-08	down_regulated	Mcpt8
ENSMUSG00000034522	40.0968	-1.54569	0.291771	1.96849e-11	9.09872e-09	down_regulated	Zfp395
ENSMUSG00000093954	14.0986	-2.11484	0.551629	9.46113e-08	1.23636e-05	down_regulated	Gm16867
ENSMUSG00000022186	143.822	-0.599123	0.138092	1.21177e-06	0.000112417	down_regulated	Oxct1
ENSMUSG00000059305	719.979	-0.617165	0.280026	0.000153425	0.00625695	down_regulated	Vpreb1a
ENSMUSG00000056399	1862.88	-0.799499	0.195232	9.06135e-07	8.73989e-05	down_regulated	Prss34
ENSMUSG00000023991	256.367	-0.533414	0.108398	1.27414e-07	1.62996e-05	down_regulated	Foxp4
ENSMUSG00000031391	61.8984	-0.763531	0.187351	1.30287e-06	0.000118163	down_regulated	L1cam
ENSMUSG00000032750	58.9111	-2.14783	0.253414	4.1047e-19	1.24711e-15	down_regulated	Gab3
ENSMUSG00000032750	58.9111	-2.14783	0.253414	4.1047e-19	1.24711e-15	down_regulated	Gm38425
ENSMUSG00000031310	53.2388	-0.904119	0.212999	1.79705e-07	2.12034e-05	down_regulated	Zmym3

## Sheet: Table S3
Table S3: GSEA for ckit-
pathway	pval	padj	log2err	ES	NES	size	genes
B CELL RECEPTOR SIGNALING PATHWAY (GO: BP)	3.54588e-08	1.36077e-05	0.719513	0.673757	2.35944	54	Cd79b,Cd79a,Cd19,Blnk,Foxp1,Ighm,Cd22,Klhl6,Abl1,Cd38,Mef2c,Prkch,Blk,Prkcb,Rftn1,Syk,Nfkb1,Lyn,Sh2b2,Vav3
V D J RECOMBINATION (GO: BP)	2.11898e-06	0.00030436	0.627257	0.807595	2.27331	20	Lef1,Rag1,Xrcc6,Rag2,Foxp1,Ezh2,Tcf3,Hmgb1,Dclre1c,Nhej1,Prkdc,Atm,Tcf7,Dcaf1
B CELL ACTIVATION (GO: BP)	2.14837e-13	1.65532e-09	0.943632	0.504234	2.21344	268	Vpreb1b,Cd79b,Cd79a,Cd19,Blnk,Vpreb1a,Pou2af1,Lef1,Gimap1,Hdac7,Rag1,Pik3cd,Bst1,Tpd52,Il7r,Rag2,Zfp36l1,Hdac5,Tbc1d10c,Cxcr5,Foxp1,Siglecg,Spib,Syvn1,Ezh2,Dpp4,Ighm,Lax1,Cd22,Inpp5d,Abl1,Cd38,Mef2c,Tcf3,Gpr183,Shld2,Ighd,Prkcb,Kmt5b,Lfng,Traf3ip2,H2-Ab1,Mfng,Themis2,Nsd2,Irs2,Kmt5c,Card11,Syk,Tnfaip3,Paxip1,Lyn,Vav3,Pnp,Top2b,Msh2,Mzb1,Fzd9,Shb,Bak1,Dclre1c,Fcrl1,Pou2f2,Atad5,Nfatc1,Casp3,Pik3r1…
REGULATION OF TRANSLATIONAL INITIATION IN RESPONSE TO STRESS (GO: BP)	1.4374e-05	0.00141989	0.593325	0.817577	2.20081	17	Hbb-bs,Fech,Ppp1r15a,Eif2ak1,Stk35,Eif2ak3
B CELL DIFFERENTIATION (GO: BP)	2.07519e-08	8.88295e-06	0.733762	0.523671	2.15022	146	Cd79b,Cd79a,Cd19,Pou2af1,Gimap1,Hdac7,Rag1,Tpd52,Rag2,Zfp36l1,Hdac5,Foxp1,Spib,Syvn1,Ezh2,Dpp4,Ighm,Inpp5d,Abl1,Tcf3,Gpr183,Lfng,Traf3ip2,H2-Ab1,Mfng,Card11,Syk,Tnfaip3,Pnp,Top2b,Msh2,Fzd9,Bak1,Dclre1c,Pou2f2,Nfatc1,Pik3r1,Nhej1,Prkdc,Pcid2,Dock11,Irf8,Myb,Gm13283,Cd24a,Atm,Zbtb1,Itfg2,Hhex,Il7,Bcl11a,Dcaf1,Dock10,Clcf1,Hdac9,Stat5b,Btk
REGULATION OF TRANSLATIONAL INITIATION BY EIF2 ALPHA PHOSPHORYLATION (GO: BP)	1.30773e-05	0.00132579	0.593325	0.851381	2.14903	14	Hbb-bs,Fech,Ppp1r15a,Eif2ak1,Stk35,Eif2ak3
HETEROCHROMATIN FORMATION (GO: BP)	1.2295e-07	3.26667e-05	0.690132	0.514169	2.07364	133	Smarca4,Ezh2,H2az2,Baz2a,Kmt2a,Macroh2a2,H1f0,Resf1,H2ac8,Phf2,H3f3a,Dnmt3a,Cbx3,H2ac11,Ctcf,Dyrk1a,Nrde2,Smchd1,Hmgb1,Sirt1,H2ac20,Xist,Jpx,Ezh1,Cdyl,Brca1,H2al1m,Smarca5,Mphosph8,Uhrf1,Hells,Kmt2d,Ehmt2,Samd1,Ehmt1,H2ac4,Rbm15,Lmnb1,Rbm15b,Fkbp6,Rlim,H2ac25,Cdk2,Phf8,Ddx4,Cbx5,Hnrnpu,Suz12,Ppm1d,Kdm1a,Dnmt3b,L3mbtl3,Ythdc1,Wdhd1,Bmi1
B CELL PROLIFERATION (GO: BP)	3.10987e-06	0.00041313	0.627257	0.53828	2.06691	93	Vpreb1b,Cd79a,Cd19,Vpreb1a,Lef1,Bst1,Il7r,Rag2,Siglecg,Ighm,Cd22,Inpp5d,Abl1,Cd38,Mef2c,Tcf3,Gpr183,Ighd,Irs2,Card11,Lyn,Vav3,Mzb1,Shb,Atad5,Casp3,Prlr,Nfatc2,Rc3h1,Gm13283,Cd24a,Atm
GAS TRANSPORT (GO: BP)	0.000212026	0.0105398	0.518848	0.790106	2.04794	15	Hba-a1,Hbb-bs,Bpgm,Rhag
REGULATION OF TRANSLATION IN RESPONSE TO STRESS (GO: BP)	0.000265486	0.012104	0.498493	0.693723	2.03613	24	Hbb-bs,Fech,Ppp1r15a,Eif2ak1,Prkch,Stk35,Eif2ak3
SEX CHROMOSOME DOSAGE COMPENSATION (GO: BP)	0.000784005	0.0278376	0.477271	0.699844	1.99859	21	Macroh2a2,Ctcf,Smchd1,Xist,Jpx,Cdyl,Brca1,Rbm15,Rbm15b,Rlim,Hnrnpu,Suz12,Ythdc1
FACULTATIVE HETEROCHROMATIN FORMATION (GO: BP)	0.000125597	0.00735942	0.518848	0.597517	1.99685	45	Smarca4,Ezh2,Baz2a,Kmt2a,Resf1,Phf2,Dnmt3a,Ctcf,Dyrk1a,Sirt1,Ezh1,Smarca5,Mphosph8,Hells,Ehmt2,Samd1,Ehmt1,Phf8,Suz12,Ppm1d,Kdm1a,Dnmt3b,L3mbtl3,Bmi1
HYDROGEN PEROXIDE CATABOLIC PROCESS (GO: BP)	0.000611088	0.0225284	0.477271	0.670649	1.97694	25	Hbb-bt,Hba-a1,Hbb-bs,Cat,Snca,Hbq1b,Mt3
ERYTHROCYTE DEVELOPMENT (GO: BP)	0.000199337	0.00997331	0.518848	0.567527	1.95397	51	Hba-a2,Alas2,Hba-a1,Slc4a1,Hbb-bs,Bpgm,Dmtn,Rhag,Sox6,Epb42,Ptbp3,Bap1,Srf,Slc11a2,Brd1,Fam210b,Rps6,Slc25a40,Heatr3,Rhd
MATURE B CELL DIFFERENTIATION (GO: BP)	0.000215252	0.0106315	0.518848	0.590165	1.9519	43	Cd19,Pou2af1,Rag2,Dpp4,Gpr183,Lfng,Mfng,Tnfaip3,Pou2f2,Nfatc1,Dock11,Irf8
REGULATION OF HEMOGLOBIN BIOSYNTHETIC PROCESS (GO: BP)	6.04953e-05	0.00456976	0.557332	0.930451	1.95	7	Slc25a37,Slc6a9,Fech,Eif2ak1,Abcb10
PROTEIN LOCALIZATION TO CHROMATIN (GO: BP)	0.000284891	0.0126853	0.498493	0.583339	1.93265	44	Lef1,Ezh2,Parp1,H1f5,Macroh2a2,Nipbl,Esr1,Zmynd8,Brd2,Msh2,H2ac4,Mcm8,Rad21,Daxx,Esco2,Carm1,Vcpip1,Cdk9,Brd3,Pias4
HEMOGLOBIN METABOLIC PROCESS (GO: BP)	0.00168684	0.0472784	0.45506	0.685032	1.9283	20	Alas2,Slc25a37,Cat,Slc6a9,Fech,Eif2ak1,Epb42,Lyn
DNA RECOMBINATION (GO: BP)	1.09619e-08	6.10282e-06	0.74774	0.428092	1.90812	310	Lef1,Rag1,Xrcc6,Rag2,Msh5,Foxp1,Ezh2,Parp1,Abl1,Tcf3,H1f5,Shld2,Ube2b,Kmt5b,Spo11,Nabp1,H1f0,Fan1,Nsd2,Ap5s1,Nipbl,Kmt5c,Rnf169,Paxip1,Ppp4r2,Rpa1,Sfpq,Xrcc1,Kin,Zmynd8,Tep1,Xrn2,Ino80b,Smchd1,Mei4,Top2b,Pot1b,Trrap,Hmgb1,Cntd1,Brd8,Msh2,Rnf212,Recql,Sfr1,H1f1,Ep400,Dclre1c,Atad5,Ing3,Helb,Brca1,Mus81,Lig1,Nucks1,Nhej1,Prkdc,Ints3,Tgfb1,Apex2,Nsmce1,Eme2,Ube2n,Mcm4,Chek1,Cenps,Apex1,Epc1,Pif1,Mnd…
SOMATIC DIVERSIFICATION OF IMMUNE RECEPTORS (GO: BP)	0.000102199	0.00674795	0.538434	0.511295	1.89779	78	Lef1,Rag1,Xrcc6,Rag2,Foxp1,Ezh2,Tcf3,Shld2,Ighd,Kmt5b,Nsd2,Kmt5c,Paxip1,Hmgb1,Msh2,Dclre1c,Atad5,Nhej1,Prkdc,Tgfb1,Msh3,Atm,Tcf7,Adar,Exosc3,Sanbr,Il4,Swap70,Dcaf1,Clcf1,Mad2l2
NUCLEOSOME ORGANIZATION (GO: BP)	5.74969e-05	0.00438627	0.557332	0.505109	1.89376	83	Smarca4,H3c3,H1f5,Macroh2a2,H1f0,Smarcc2,Smarcd1,Brd2,Atad2,H1f1,Sart3,Smarcc1,Smarca5,Smarce1,Dnajc9,Shprh,Smarcb1,H2ac25,Kat6a,Chrac1,Chd1,Daxx,Ttc39aos1,Ubn1,Ssrp1,Smarca2,H3c6,Chaf1b,Chaf1a,H3c4,Sox9,Tspyl4,Nasp,Rsf1,Anp32b,H1f3,Supt16,Tspyl2,Asf1a,Mcm3ap,Tspyl1,Cebpg,Setd2,H3c15
CARBON DIOXIDE TRANSPORT (GO: BP)	0.00109661	0.0349922	0.45506	0.808714	1.88995	11	Hba-a1,Hbb-bs,Rhag,Hbb-y
NEGATIVE REGULATION OF GENE EXPRESSION EPIGENETIC (GO: BP)	4.83627e-06	0.000582446	0.610527	0.454633	1.87963	162	Smarca4,Ezh2,H2az2,Baz2a,Kmt2a,Phf19,Macroh2a2,H1f0,Resf1,H2ac8,Phf2,H3f3a,Dnmt3a,Cbx3,H2ac11,Uhrf2,Ctcf,Dyrk1a,Nrde2,Smchd1,Hmgb1,Sirt1,H2ac20,Xist,Lhx2,Jpx,Ezh1,Cdyl,Brca1,H2al1m,Smarca5,Mphosph8,Mta1,Chek1,Epc1,Uhrf1,Hells,Kmt2d,Ehmt2,Samd1,Ehmt1,H2ac4,Rbm15,Lmnb1,Rbm15b,Fkbp6,Rlim,H2ac25,Cdk2,Phf8,Ddx4,Usp7,Hdac9,Cbx5,Hnrnpu,Suz12,Ppm1d,Kdm1a,Dnmt3b,L3mbtl3,Ythdc1,Wdhd1,Bmi1
NUCLEOSOME ASSEMBLY (GO: BP)	0.000341335	0.0144912	0.498493	0.517369	1.87329	65	Smarca4,H3c3,H1f5,Macroh2a2,H1f0,Brd2,Atad2,H1f1,Sart3,Smarca5,Dnajc9,Shprh,Kat6a,Chrac1,Daxx,Ubn1,Ssrp1,Smarca2,H3c6,Chaf1b,Chaf1a,H3c4,Sox9,Tspyl4,Nasp,Rsf1,Anp32b,H1f3,Supt16,Tspyl2,Asf1a
ANTIGEN RECEPTOR MEDIATED SIGNALING PATHWAY (GO: BP)	3.02987e-06	0.000409564	0.627257	0.451174	1.87027	164	Cd79b,Cd79a,Cd19,Blnk,Plcg1,Pde4b,Foxp1,Ighm,Lax1,Cd22,Klhl6,Abl1,Cd38,Mef2c,Prkd2,Prkch,Blk,Prkcb,Themis2,Rftn1,Dusp22,Carmil2,Elf1,Card11,Syk,Nfkb1,Lyn,Cd2ap,Fyn,Tespa1,Sh2b2,Vav3,Eif2b2,Sla2,Khdrbs1,Shb,Cblb,Fcho1,Rc3h2,Eif2b5,Ube2n,Stap1,Lpxn,Clec2i,Nfatc2
ALDITOL PHOSPHATE METABOLIC PROCESS (GO: BP)	0.00174864	0.0481188	0.45506	0.796618	1.86168	11	Gpam,Gpat3,Gpd1l,Slc37a2,Gpd1,Gpat2,Abhd6
LYMPHOCYTE HOMEOSTASIS (GO: BP)	0.000118094	0.00733034	0.538434	0.482444	1.85513	94	Vpreb1b,Vpreb1a,Rag1,Gpam,Pik3cd,Il7r,Chst3,Abl1,Mef2c,Aim2,Traf3ip2,Spta1,Tnfaip3,Lyn,Sh2b2,Ccnb2,Gimap5,Il2ra,Bak1,Casp3,Sit1,Tgfb1,Tsc22d3,Rc3h2,Gimap3,Dock11,Rc3h1,Gpr15lg,Rps6,Cd24a,Skil,Zc3h8,Tnfrsf13c,Dock10,P2rx7,Stat5b
POSITIVE REGULATION OF LYMPHOCYTE DIFFERENTIATION (GO: BP)	2.01226e-05	0.00184577	0.57561	0.459539	1.85331	133	Lef1,Smarca4,Sox4,Rag1,Xrcc6,Il7r,Inpp5d,Rhoh,Carmil2,Smarcc2,Smarcd1,Il1rl2,Syk,Prkcz,H2-Aa,Socs5,Wnt10b,Klhl25,Tespa1,Gas6,Irf1,Cd1d1,Itpkb,Pnp,Gimap5,Il12a,Brd2,Il2ra,Shb,Smarcc1,Prkdc,Ccr2,Tgfb1,Pcid2,Socs1,Gimap3,Tgfbr2,Smarce1,Ambra1,Smarcb1,Pbrm1,Brd4,Zbtb1,Sart1,Ccr7,Actl6a,Il7,Il4
ERYTHROCYTE HOMEOSTASIS (GO: BP)	4.91356e-06	0.000582446	0.610527	0.445548	1.8531	165	Hba-a2,Alas2,Hba-a1,Slc4a1,Hbb-bs,Smarca4,Bpgm,Slc1a5,Ypel4,Trim10,Zfp36l1,Fech,Dmtn,Isg15,Rhag,Inpp5d,Sox6,Tcf3,Epb42,Ptbp3,Lyn,Tgfbr3,Kmt2e,Ncapg2,Acvr1b,Bap1,Ufl1,Casp3,Srf,Slc11a2,Prkdc,Brd1,Myb,Smad5,Fam210b,Lmo2,Rps6,Slc25a40,Cd24a,Heatr3,Rhd,Ncor1,Adar,Tcea1,Pknox1,Acvr2a,Hscb,Slc25a38,Axin1,Stat5b,Klf1,Tal1,Kdm1a,Slc25a5,L3mbtl3,Sp1,Dyrk3,Senp1,Arid4a,Abcb10,Tspo2,Ankle1,Epas1
POTASSIUM ION HOMEOSTASIS (GO: BP)	0.00170236	0.0473526	0.45506	0.604931	1.8361	28	Atp1b1,Slc12a3,Atp1b3,Camk2d,Slc12a6,Slc12a7,Kcna5
IMMUNOGLOBULIN V D J RECOMBINATION (GO: BP)	0.00140039	0.0411833	0.45506	0.798845	1.82444	10	Foxp1,Ezh2,Tcf3,Nhej1,Prkdc
LYMPHOCYTE ACTIVATION (GO: BP)	9.49153e-13	3.65661e-09	0.91012	0.37428	1.80784	776	Vpreb1b,Cd79b,Cd79a,Cd19,Blnk,Slc4a1,Vpreb1a,Irf4,Pou2af1,Lef1,Slamf7,Slamf6,Smarca4,Gimap1,Wdfy4,Sox4,Hdac7,Rag1,Xrcc6,Gpam,Pik3cd,Bst1,Tpd52,Il7r,Rag2,Cd37,Zfp36l1,Hdac5,H2-Oa,H2-Ob,Tbc1d10c,Rsad2,Nrarp,Cxcr5,Foxp1,Siglecg,Spib,Syvn1,Ezh2,Dpp4,Ighm,H2-Eb1,Lax1,Gpr18,Cd22,Hes1,Inpp5d,Abl1,Cd38,Mef2c,Tcf3,Prex1,Gpr183,Shld2,Kmt2a,Sdc4,Ighd,Prkcb,Kmt5b,Lfng,Traf3ip2,H2-Ab1,Mfng,Cd48,Themis2,Ifnar1…
CD4 POSITIVE ALPHA BETA T CELL DIFFERENTIATION (GO: BP)	0.000550841	0.0209075	0.477271	0.459248	1.78198	98	Irf4,Lef1,Slamf6,Gimap1,Rsad2,Foxp1,Gpr183,Kmt2a,Otud5,Prkcz,Socs5,Klhl25,Irf1,Gimap5,Brd2,Men1,Hmgb1,Mtor,Shb,Ccr2,Tgfb1,Rc3h2,Socs1,Gimap3,Armc5,Myb,Rc3h1,Brd4,Ncor1,Ccr7,Il4,Relb
NUCLEAR TRANSCRIBED MRNA CATABOLIC PROCESS (GO: BP)	9.32646e-05	0.00635932	0.538434	0.443765	1.76194	118	Zfp36l1,Pnrc1,Btg2,Apobec1,Cnot6l,Xrn2,Cpeb3,Exosc5,Tent4b,Xrn1,Pnrc2,Dhx36,Ago2,Gtpbp2,Rc3h2,Thrap3,Edc3,Eif3e,Patl1,Rc3h1,Smg1,Tnrc6b,Nanos3,Tnrc6a,Atm,Caprin1,Parn,Cnot1,Dcp2,Patl2,Smg6,Cnot6,Pan2,Exosc3,Pym1,Rnps1,Exosc8,Exosc9,Gspt1,Magoh,Hnrnpu,Dhx9,Secisbp2,Magohb,Nanos1,Upf1,Pan3,Pelo,Dhx34,Gspt2,Smg8
POSITIVE REGULATION OF MRNA CATABOLIC PROCESS (GO: BP)	0.000522484	0.0202299	0.477271	0.45769	1.75995	94	Zfp36l1,Btg2,Cnot6l,Tut4,Mettl14,Pum1,Cpeb3,Zc3h12d,Tent4b,Dhx36,Ago2,Alkbh5,Rc3h2,Mettl16,Hnrnpr,Patl1,Rc3h1,Tnrc6b,Tut7,Nanos3,Gigyf2,Tnrc6a,Caprin1,Parn,Cnot1,Dcp2,Patl2,Cnot6,Pan2,Exosc3,Ythdf3,Exosc8,Exosc9,Zc3hav1,Plekhn1,Hnrnpu,Dhx9,Tardbp,Nanos1,Upf1,Pan3
POSITIVE REGULATION OF LYMPHOCYTE ACTIVATION (GO: BP)	2.01014e-06	0.00030436	0.627257	0.393061	1.75198	310	Slc4a1,Lef1,Smarca4,Sox4,Rag1,Xrcc6,Gpam,Bst1,Il7r,H2-Oa,H2-Ob,Dpp4,Ighm,H2-Eb1,Hes1,Inpp5d,Abl1,Cd38,Mef2c,Tcf3,Gpr183,Shld2,Ighd,Kmt5b,H2-Ab1,Rhoh,Carmil2,Nsd2,Spta1,Irs2,Kmt5c,Smarcc2,Card11,Smarcd1,Il1rl2,Syk,Paxip1,Prkcz,H2-Aa,Socs5,Wnt10b,Cd5,Klhl25,Tespa1,Gas6,Cd274,Ccl5,Irf1,Cd1d1,Itpkb,Vav3,Pnp,Gimap5,Il12a,Efnb3,Brd2,Hmgb1,Msh2,Il2ra,Shb,Fcho1,Atad5,Tnfsf14,Smarcc1,Il12rb1,Prkdc,Ccr2,Tg…
PROTEIN LOCALIZATION TO CHROMOSOME (GO: BP)	0.000256383	0.0117585	0.498493	0.440954	1.75083	117	Lef1,Ezh2,Parp1,H1f5,Macroh2a2,Spo11,Mtbp,Stag3,Nipbl,Esr1,Pot1a,Rpa1,Ctcf,Bub1b,Zmynd8,Rcc2,Tinf2,Pot1b,Brd2,Msh2,Spdl1,Mdc1,Trappc12,Haspin,Aurkb,H2ac4,Tnks2,Zwilch,Mcm8,Rad21,Daxx,Rad17,Smc5,Esco2,Carm1,Vcpip1,Cenpq,Cdk9,Brd3,Slf2,Pias4
T CELL DIFFERENTIATION (GO: BP)	1.19634e-06	0.000196123	0.643552	0.391675	1.74971	321	Irf4,Lef1,Slamf6,Smarca4,Gimap1,Sox4,Rag1,Il7r,Rag2,Zfp36l1,H2-Oa,Rsad2,Nrarp,Foxp1,Gpr18,Abl1,Tcf3,Prex1,Gpr183,Kmt2a,Lfng,Traf3ip2,Rhoh,Carmil2,Smarcc2,Card11,Smarcd1,Il1rl2,Syk,Otud5,Prkcz,H2-Aa,Socs5,Wnt10b,Klhl25,Tespa1,Irf1,Cd1d1,Itpkb,Pnp,Gimap5,Il12a,Brd2,Men1,Hmgb1,Mtor,Il2ra,Shb,Runx2,Lmbr1l,Apc,Srf,Smarcc1,Dock2,Nhej1,Prkdc,Ccr2,Tgfb1,Rc3h2,Socs1,Tnfrsf9,Patz1,Gimap3,Tsc1,Armc5,Tgfbr2,…
MONONUCLEAR CELL DIFFERENTIATION (GO: BP)	1.90998e-08	8.65669e-06	0.733762	0.373995	1.74639	509	Cd79b,Cd79a,Cd19,Irf4,Pou2af1,Lef1,Slamf6,Smarca4,Gimap1,Sox4,Hdac7,Rag1,Xrcc6,Tpd52,Il7r,Rag2,Zfp36l1,Hdac5,H2-Oa,Rsad2,Nrarp,Eif2ak1,Foxp1,Spib,Syvn1,Ezh2,Dpp4,Ighm,Gpr18,Inpp5d,Abl1,Mef2c,Tcf3,Prex1,Gpr183,Kmt2a,Lfng,Traf3ip2,H2-Ab1,Mfng,Rhoh,Carmil2,Smarcc2,Card11,Smarcd1,Il1rl2,Syk,Otud5,Tnfaip3,Adipoq,Prkcz,Lyn,H2-Aa,Socs5,Wnt10b,Klhl25,Tespa1,Gas6,Irf1,Cd1d1,Itpkb,Hectd1,Pnp,Top2b,Gimap5,I…
ALPHA BETA T CELL DIFFERENTIATION (GO: BP)	0.000219442	0.0107043	0.518848	0.429022	1.73643	134	Irf4,Lef1,Slamf6,Gimap1,Rsad2,Foxp1,Gpr18,Abl1,Gpr183,Kmt2a,Syk,Otud5,Prkcz,Socs5,Klhl25,Irf1,Cd1d1,Itpkb,Pnp,Gimap5,Brd2,Men1,Hmgb1,Mtor,Shb,Ccr2,Tgfb1,Rc3h2,Socs1,Gimap3,Armc5,Tgfbr2,Myb,Rc3h1,Brd4,Tcf7,Ncor1,Ccr7,Tnfsf8,Il4,Abl2,Relb
POSITIVE REGULATION OF B CELL ACTIVATION (GO: BP)	0.00102169	0.0332157	0.45506	0.461676	1.7351	84	Bst1,Ighm,Inpp5d,Cd38,Mef2c,Tcf3,Gpr183,Shld2,Ighd,Kmt5b,Nsd2,Irs2,Kmt5c,Card11,Syk,Paxip1,Vav3,Pnp,Msh2,Atad5,Tgfb1,Pcid2,Prlr,Nfatc2,Sh3kbp1,Akirin2,Exosc3,Il7,Il4,Tnfrsf13c,Clcf1,Mad2l2,Stat5b,Tnip2,Btk
ALPHA BETA T CELL ACTIVATION (GO: BP)	2.33663e-05	0.00198856	0.57561	0.408981	1.72512	189	Irf4,Lef1,Slamf6,Gimap1,Wdfy4,Rsad2,Foxp1,Gpr18,Abl1,Gpr183,Kmt2a,H2-Ab1,Card11,Syk,Otud5,Prkcz,Socs5,Klhl25,Cd274,Irf1,Cd1d1,Itpkb,Pnp,Adora2a,Gimap5,Il12a,Brd2,Men1,Itch,Hmgb1,Mtor,Il2ra,Shb,Cblb,Dock2,H2-M3,Ccr2,Tgfb1,Rc3h2,Socs1,Gimap3,Armc5,Tgfbr2,Myb,Rc3h1,Brd4,Cd24a,Tcf7,Clec4f,Clec4g,Ncor1,Cebpb,Ccr7,Tnfsf8,Il4,Abl2,Relb,Txk,Hsph1,Tarm1,Malt1,Cd160,Il18r1
MITOTIC CELL CYCLE CHECKPOINT SIGNALING (GO: BP)	0.000126567	0.00735942	0.518848	0.419334	1.72171	148	Sde2,Foxo4,Nabp1,Mtbp,Mbtps1,Rbm38,E2f7,Trim39,Mbd4,Uimc1,Bub1b,Syf2,Foxn3,Cradd,Trrap,Msh2,Mad2l1bp,Stil,Cdc20,Apc,Spdl1,Brca1,Mus81,Prkdc,Ints3,Chfr,Eme2,Pcid2,Nae1,Chek1,Ndc80,Haspin,Aurkb,Chek2,Inip,Gigyf2,Trip13,Zwilch,Rps6,Brsk1,Atm,Fancd2,Bard1,Nop53,Rad17,Dync1li1,Bub1,Wac,Incenp,Cdk5rap2,Ppp1r10,Vps4a,Casp2,Mre11a,Fzr1,Dgkz,Cdk5rap3,Cenpe,Babam1,Spc24,Taok2,Rad9b,Clspn,Atr,Ttk,Ppp2r5c,Kn…
HOMEOSTASIS OF NUMBER OF CELLS (GO: BP)	2.1234e-07	5.27767e-05	0.690132	0.377266	1.71825	387	Hba-a2,Vpreb1b,Alas2,Hba-a1,Slc4a1,Hbb-bs,Vpreb1a,Smarca4,Bpgm,Sox4,Slc1a5,Rag1,Gpam,Ypel4,Pik3cd,Trim10,Il7r,Chst3,Zfp36l1,Fech,Dmtn,Pde4b,Bcr,Isg15,Ezh2,Rhag,Inpp5d,Sox6,Abl1,Mef2c,Tcf3,Gpr183,Aim2,Kmt2a,Adgrg1,Epb42,Traf3ip2,Carmil2,Spta1,Card11,Tnfaip3,Ptbp3,Lyn,Rpa1,Sh2b2,Tgfbr3,Kmt2e,Itpkb,Ncapg2,Atxn2,Ccnb2,Cadps2,Gimap5,Men1,Hmgb1,Acvr1b,Bap1,Il2ra,Zbtb18,Ufl1,Bak1,Sart3,Ezh1,Cd7,Casp3,Sr…
DNA REPAIR (GO: BP)	1.18809e-08	6.10282e-06	0.74774	0.362861	1.71397	573	Bcl7a,Smarca4,Xrcc6,Dntt,Usp3,Neil1,Msh5,Pold4,Otub2,Parp1,Abl1,Shld2,Ube2b,Kmt5b,Spo11,Nabp1,Emsy,Apbb1,Huwe1,Rrm2b,Fan1,Nsd2,Ap5s1,Nipbl,Kmt5c,Smarcc2,Smarcd1,Polh,Dtx3l,Rnf169,Paxip1,Ppp4r2,Pot1a,Rpa1,Sfpq,Xrcc1,Kin,Mbd4,Uimc1,Ube2a,Zmynd8,Ccdc117,Xrn2,Pole,Kif22,Dyrk1b,Nscme3l,Ino80b,Pnp,Smchd1,Uvrag,Pot1b,Trrap,Ascc2,Hmgb1,Brd8,Msh2,Recql,Sfr1,Sirt1,Ufl1,Ep400,Dclre1c,Firrm,Hinfp,Ing3,Helb,R…
PROTEIN DNA COMPLEX ORGANIZATION (GO: BP)	8.68394e-10	7.43442e-07	0.801216	0.354826	1.70962	742	Bcl7a,Irf4,Smarca4,Hdac7,Rag1,Tcf4,Rag2,Usp3,Hdac5,Hdac11,Bicra,Ezh2,Cecr2,Supt4a,H2az2,Baz2a,Apobec1,H3c3,Hmg20b,Tcf3,Hmg20a,H1f5,Banp,Kmt2a,Phf19,Myo1c,Cbx2,Ube2b,Prkcb,Kmt5b,Macroh2a2,H1f0,Emsy,Apbb1,Cbx7,Nsd2,Nipbl,Resf1,H2ac8,Phf2,Utp3,H3f3a,Esr1,Kmt5c,Kdm4a,Brpf3,Smarcc2,Zmynd11,Smarcd1,Dtx3l,Bahcc1,Paxip1,Chd3,Dlgap5,Dnmt3a,Zfp369,Cbx3,Sfpq,Wnt10b,H2ac11,Uhrf2,Uimc1,Ctcf,Ube2a,Pik3ca,Dyrk1…
DNA DAMAGE RESPONSE (GO: BP)	1.09884e-10	1.69332e-07	0.839089	0.3506	1.70291	847	Bcl7a,Foxo1,Smarca4,Sox4,Bcl2l1,Xrcc6,Dntt,Uaca,Usp3,Crip1,Neil1,Bbc3,Ddit4,Msh5,Pold4,Foxp1,Otub2,Parp1,Btg2,Abl1,Sde2,Foxo4,Shld2,Rptor,Aim2,Dyrk2,Shisa5,Ube2b,Kmt5b,Spo11,Nabp1,Emsy,Clock,Fnip2,Apbb1,Huwe1,Rrm2b,Fan1,Nsd2,Ap5s1,Nipbl,Mbtps1,Kmt5c,Smarcc2,Smarcd1,Polh,Dtx3l,Rnf169,Rbm38,E2f7,Trim39,Paxip1,Cib1,Ppp4r2,Cbx3,Lyn,Pot1a,Rpa1,Sfpq,Xrcc1,Kin,Mbd4,Uimc1,Ube2a,Syf2,Zmynd8,Foxn3,Ccdc117,…
REGULATION OF B CELL ACTIVATION (GO: BP)	0.000177539	0.00936944	0.518848	0.419406	1.70271	135	Cd19,Bst1,Zfp36l1,Tbc1d10c,Siglecg,Ighm,Cd22,Inpp5d,Cd38,Mef2c,Tcf3,Gpr183,Shld2,Ighd,Kmt5b,Themis2,Nsd2,Irs2,Kmt5c,Card11,Syk,Tnfaip3,Paxip1,Lyn,Vav3,Pnp,Msh2,Mzb1,Atad5,Casp3,Tgfb1,Pcid2,Prlr,Nfatc2,Rc3h1,Cd24a,Sh3kbp1,Atm,Akirin2,Exosc3,Il7,Il4,Tnfrsf13c,Clcf1,Mad2l2,Stat5b,Tnip2,Btk
DOUBLE STRAND BREAK REPAIR (GO: BP)	6.52221e-06	0.000707797	0.610527	0.384207	1.70244	296	Bcl7a,Smarca4,Xrcc6,Dntt,Otub2,Parp1,Abl1,Shld2,Kmt5b,Spo11,Nabp1,Apbb1,Fan1,Nsd2,Ap5s1,Nipbl,Kmt5c,Smarcc2,Smarcd1,Dtx3l,Rnf169,Ppp4r2,Pot1a,Rpa1,Sfpq,Xrcc1,Uimc1,Zmynd8,Smchd1,Uvrag,Pot1b,Trrap,Brd8,Msh2,Recql,Sfr1,Sirt1,Ep400,Dclre1c,Ing3,Helb,Brca1,Smarcc1,Mus81,Lig1,Nucks1,Nhej1,Prkdc,Ints3,Dek,Nsmce1,Eme2,Ube2n,Mta1,Mcm4,Chek1,Smarce1,Epc1,Chek2,Slx4,Smarcb1,Pbrm1,Inip,Cdca5,Pogz,Trip13,Sws…
PROTEIN DEUBIQUITINATION (GO: BP)	0.00126928	0.0380537	0.45506	0.440814	1.69506	94	Stambpl1,Usp3,Otub2,Otud1,Usp19,Otud5,Tnfaip3,Usp25,Itch,Bap1,Usp42,Mindy2,Usp34,Usp32,Uchl1,Usp24,Dnajb2,Ubxn1,Atxn3,Usp1,Usp8,Usp27x,Usp15,Usp5,Usp4,Usp49,Usp7,Nop53,Usp53,Usp18,Usp14,Cops5,Vcpip1,Mindy1,Usp10
PROTEIN DNA COMPLEX ASSEMBLY (GO: BP)	0.000186725	0.00965583	0.518848	0.402624	1.68326	168	Smarca4,Tcf4,H3c3,H1f5,Macroh2a2,H1f0,Esr1,Dlgap5,Wnt10b,Med29,Brd2,Atad2,Hmgb1,Med24,H1f1,Cenpi,Psmc6,Sart3,Creb1,Med18,Gtf2h5,Cenpt,Cand1,Smarca5,Trappc12,Dnajc9,Shprh,Taf3,Pogz,Kat6a,Chrac1,Daxx,Gtf2f2,Cdc45,Taf6,Med6,Cenpc1,Ubn1,Cenph,Brf2,Ssrp1,Smarca2,H3c6,Itgb3bp,Med27,Chaf1b,Chaf1a,Cenpe,Cenpk,Taf2,H3c4,Hjurp,Sox9,Dmc1,Tspyl4,Nasp,Rsf1,Taf8,Anp32b,Taf1,H1f3,Taf1b,Dr1,Supt16,Tspyl2,Ep300,O…
CD4 POSITIVE ALPHA BETA T CELL ACTIVATION (GO: BP)	0.000791924	0.0279898	0.477271	0.41652	1.67402	130	Irf4,Lef1,Slamf6,Gimap1,Rsad2,Foxp1,Gpr183,Kmt2a,Card11,Otud5,Prkcz,Socs5,Klhl25,Cd274,Irf1,Gimap5,Il12a,Brd2,Men1,Itch,Hmgb1,Mtor,Il2ra,Shb,Cblb,Ccr2,Tgfb1,Rc3h2,Socs1,Gimap3,Armc5,Tgfbr2,Myb,Rc3h1,Brd4,Cd24a,Ncor1,Cebpb,Ccr7
IMMUNOGLOBULIN PRODUCTION (GO: BP)	0.00023409	0.0112029	0.518848	0.39913	1.66586	167	Vpreb1b,Vpreb3,Vpreb1a,Il7r,Cd37,Foxp1,Siglecg,Ezh2,Ighm,Lax1,Cd22,Tcf3,Shld2,Ighd,Kmt5b,Traf3ip2,H2-Ab1,Nsd2,Kmt5c,Card11,Tnfaip3,Paxip1,Msh2,Mzb1,Pou2f2,Atad5,Zpbp2,Nhej1,Prkdc,Tgfb1
REGULATION OF LYMPHOCYTE DIFFERENTIATION (GO: BP)	0.000125592	0.00735942	0.518848	0.38917	1.66288	210	Lef1,Smarca4,Sox4,Rag1,Xrcc6,Il7r,Rag2,Zfp36l1,H2-Oa,Nrarp,Inpp5d,Abl1,Rhoh,Carmil2,Smarcc2,Card11,Smarcd1,Il1rl2,Syk,Prkcz,H2-Aa,Socs5,Wnt10b,Klhl25,Tespa1,Gas6,Irf1,Cd1d1,Itpkb,Pnp,Gimap5,Il12a,Brd2,Hmgb1,Il2ra,Shb,Smarcc1,Prkdc,Ccr2,Tgfb1,Rc3h2,Pcid2,Socs1,Gimap3,Tgfbr2,Smarce1,Ambra1,Smarcb1,Pbrm1,Rc3h1,Brd4,Cd24a,Tcf7,Zbtb1,Clec4g,Fancd2,Sart1,Ccr7,Tmem131l,Actl6a,Il7,Zc3h8,Il4
CELL CYCLE CHECKPOINT SIGNALING (GO: BP)	0.000172422	0.00922576	0.518848	0.391078	1.65381	191	Sde2,Foxo4,Nabp1,Clock,Mtbp,Mbtps1,Dtx3l,Rbm38,E2f7,Trim39,Lyn,Mbd4,Uimc1,Bub1b,Syf2,Foxn3,Cradd,Trrap,Msh2,Ufl1,Mad2l1bp,Stil,Cdc20,Apc,Hinfp,Spdl1,Brca1,Mus81,Prkdc,Ints3,Chfr,Eme2,Pcid2,Nae1,Chek1,Mdc1,Ndc80,Cul4a,Haspin,Aurkb,Chek2,Inip,Gigyf2,Trip13,Zwilch,Wdr76,Rps6,Brd4,Brsk1,Atm,Ercc6,Fancd2,Fem1b,Bard1,Nop53,Rad17,Tti1,Dync1li1,Bub1,Wac,Incenp,Cdk5rap2,Ppp1r10,Vps4a,Casp2,Mre11a
MRNA CATABOLIC PROCESS (GO: BP)	8.71793e-05	0.00616254	0.538434	0.381647	1.64941	228	Tent5c,Zfp36l1,Pnrc1,Slfn14,Cnot10,Btg2,Apobec1,Cnot6l,Traf3ip2,Igf2bp3,Tut4,Rbm38,Mettl14,Pum1,Xrn2,Cpeb3,Nrde2,Mtor,Exosc5,Zc3h12d,Tent4b,Xrn1,Pnrc2,Dhx36,Ago2,Gtpbp2,Alkbh5,Ago4,Rc3h2,Pcid2,Thrap3,Apex1,Mettl16,Rbm47,Hnrnpr,Edc3,Eif3e,Patl1,Rc3h1,Smg1,Tnrc6b,Tut7,Nanos3,Gigyf2,Tnrc6a,Atm,Caprin1,Parn,Cnot1,Dcp2,Patl2,Smg6,Cnot6,Traf5,Pan2,Exosc3,Pym1,Ythdf3,Rnps1,Exosc8,Exosc9,Zc3hav1,Gspt1,Di…
REGULATION OF CHROMOSOME SEGREGATION (GO: BP)	0.00129821	0.0386205	0.45506	0.409657	1.641	123	Bcl7a,Smarca4,Smarcc2,Smarcd1,Pum1,Bub1b,Ncapd3,Rcc2,Ncapg2,Sirt1,Mki67,Mad2l1bp,Cdc20,Apc,Spdl1,Smarcc1,Chfr,Pcid2,Ndc80,Smarce1,Haspin,Aurkb,Smarcb1,Pbrm1,Kif2c,Trip13,Zwilch,Atm,Rad21,Kat2b,Actl6a,Ncapd2,Pum2,Ncaph,Smc5,Hnrnpu,Dync1li1,Bub1,Iho1,Incenp,Cdk5rap2,Smarca2,Riok2,Tacc3,Anapc5,Cit
POSITIVE REGULATION OF HEMOPOIESIS (GO: BP)	0.000227397	0.0110195	0.518848	0.384796	1.64	198	Lef1,Smarca4,Sox4,Rag1,Xrcc6,Il7r,Zfp36l1,Inpp5d,Tmem64,Rptor,Rhoh,Carmil2,Smarcc2,Smarcd1,Il1rl2,Syk,Prkcz,H2-Aa,Socs5,Wnt10b,Klhl25,Tespa1,Gas6,Ccl5,Irf1,Cd1d1,Itpkb,Pnp,Gimap5,Il12a,Brd2,Hmgb1,Il2ra,Shb,Creb1,Smarcc1,Prkdc,Nedd9,Ccr2,Tgfb1,Pcid2,Socs1,Gimap3,Tgfbr2,Smarce1,Ambra1,Smarcb1,Pbrm1,Zbtb46,Brd4,Ccl3,Zbtb1,Sart1,Ccr7,Ppargc1b,Actl6a,Il7,Lif,Il4,Prkca
CHROMOSOME ORGANIZATION (GO: BP)	2.56717e-07	5.99395e-05	0.674963	0.347521	1.63252	532	Bcl7a,Smarca4,Xrcc6,Gch1,Msh5,Ezh2,Parp1,Arhgef10,Tcf7l2,Abl1,H1f5,Rrs1,Shld2,Ube2b,Spo11,H1f0,Stag3,Nipbl,Resf1,H3f3a,Kdm4a,Smarcc2,Smarcd1,Stn1,Dlgap5,Pot1a,Syce2,Rpa1,Sfpq,Xrcc1,Stag1,Bub1b,Ncapd3,Tep1,Nup155,Mau2,Kif22,Tinf2,Ino80b,Ncapg2,Map3k4,Smchd1,Mei4,Top2b,Pot1b,Hmgb1,Msh2,Rnf212,Recql,Sirt1,H1f1,Cenpi,Itpa,Dclre1c,Kif14,Mad2l1bp,Ezh1,Cdc20,Apc,Cep97,Helb,Mybl2,Tent4b,Spdl1,Ccne2,Xrn1,…
CHROMATIN REMODELING (GO: BP)	6.74419e-07	0.00012991	0.659444	0.350238	1.63169	499	Bcl7a,Irf4,Smarca4,Usp3,Hdac11,Bicra,Ezh2,Cecr2,Supt4a,H2az2,Baz2a,Apobec1,H3c3,Hmg20b,Tcf3,H1f5,Kmt2a,Phf19,Myo1c,Macroh2a2,H1f0,Apbb1,Nipbl,Resf1,H2ac8,Phf2,H3f3a,Kmt5c,Kdm4a,Smarcc2,Smarcd1,Dtx3l,Paxip1,Chd3,Dnmt3a,Zfp369,Cbx3,Sfpq,H2ac11,Uhrf2,Uimc1,Ctcf,Ube2a,Pik3ca,Dyrk1a,Epop,Kmt2e,Ino80b,Nrde2,Smchd1,Brd2,Atad2,Men1,Hmgb1,Sirt1,H1f1,Cenpi,H2ac20,Xist,Lhx2,Sart3,Jpx,Mier1,Ezh1,Cdyl,Brca1,S…
HEMOPOIESIS (GO: BP)	6.41017e-10	7.05576e-07	0.801216	0.332701	1.6229	963	Hba-a2,Alas2,Cd79b,Hba-a1,Cd79a,Cd19,Slc4a1,Hbb-bs,Vpreb1a,Irf4,Pou2af1,Lef1,Slamf6,Smarca4,Gimap1,Bpgm,Sox4,Slc1a5,Hdac7,Rag1,Xrcc6,Ypel4,Trim10,Tpd52,Il7r,Rag2,Zfp36l1,Hdac5,H2-Oa,Prxl2a,Rsad2,Nrarp,Pim1,Fech,Dmtn,Eif2ak1,Foxp1,Siglecg,Spib,Bcr,Isg15,Syvn1,Ezh2,Dpp4,Ighm,Gpr18,Hes1,Rhag,Inpp5d,Sox6,Abl1,Tmem64,Mef2c,Tcf3,Prex1,Gpr183,Rrs1,Rptor,Kmt2a,Wasf2,Hes5,Epb42,Apobec3,Lfng,Traf3ip2,Mknk2…
REGULATION OF LYMPHOCYTE ACTIVATION (GO: BP)	1.02801e-06	0.000172192	0.643552	0.347685	1.61379	483	Cd19,Slc4a1,Lef1,Slamf7,Smarca4,Sox4,Rag1,Xrcc6,Gpam,Bst1,Il7r,Rag2,Cd37,Zfp36l1,H2-Oa,H2-Ob,Tbc1d10c,Nrarp,Siglecg,Dpp4,Ighm,H2-Eb1,Lax1,Cd22,Hes1,Inpp5d,Abl1,Cd38,Mef2c,Tcf3,Gpr183,Shld2,Sdc4,Ighd,Kmt5b,H2-Ab1,Themis2,Dusp22,Rhoh,Carmil2,Nsd2,Spta1,Irs2,Kmt5c,Smarcc2,Card11,Smarcd1,Il1rl2,Syk,Tnfaip3,Paxip1,Prkcz,Lyn,H2-Aa,Socs5,Wnt10b,Cd5,Klhl25,Tespa1,Gas6,Cd274,Ccl5,Irf1,Cd1d1,Itpkb,Vav3,Gal…
MYELOID CELL HOMEOSTASIS (GO: BP)	0.000229181	0.0110365	0.518848	0.375009	1.60715	209	Hba-a2,Alas2,Hba-a1,Slc4a1,Hbb-bs,Smarca4,Bpgm,Slc1a5,Ypel4,Pik3cd,Trim10,Zfp36l1,Fech,Dmtn,Pde4b,Isg15,Rhag,Inpp5d,Sox6,Tcf3,Epb42,Traf3ip2,Ptbp3,Lyn,Tgfbr3,Kmt2e,Itpkb,Ncapg2,Hmgb1,Acvr1b,Bap1,Ufl1,Bak1,Casp3,Srf,Slc11a2,Prkdc,Ccr2,Brd1,Myb,Smad5,Fam210b,Lmo2,Rps6,Slc25a40,Cd24a,Heatr3,Rhd,Fancc,Ncor1,Adar,Tcea1
LEUKOCYTE DIFFERENTIATION (GO: BP)	2.74536e-07	6.22147e-05	0.674963	0.337468	1.60502	626	Cd79b,Cd79a,Cd19,Irf4,Pou2af1,Lef1,Slamf6,Smarca4,Gimap1,Sox4,Hdac7,Rag1,Xrcc6,Tpd52,Il7r,Rag2,Zfp36l1,Hdac5,H2-Oa,Prxl2a,Rsad2,Nrarp,Eif2ak1,Foxp1,Spib,Syvn1,Ezh2,Dpp4,Ighm,Gpr18,Inpp5d,Abl1,Tmem64,Mef2c,Tcf3,Prex1,Gpr183,Rptor,Kmt2a,Lfng,Traf3ip2,H2-Ab1,Mfng,Rhoh,Carmil2,Smarcc2,Card11,Smarcd1,Il1rl2,Syk,Otud5,Tnfaip3,Adipoq,Prkcz,Lyn,H2-Aa,Socs5,Wnt10b,Klhl25,Tespa1,Gas6,Ccl5,Irf1,Cd1d1,Epha2,…
DNA METABOLIC PROCESS (GO: BP)	2.25635e-08	9.15011e-06	0.733762	0.322983	1.57256	913	Bcl7a,Lef1,Smarca4,Rag1,Xrcc6,Dntt,Rag2,Usp3,Gch1,Neil1,Msh5,Pold4,Foxp1,Otub2,Ezh2,Id3,Camk2d,Parp1,Tcf7l2,Apobec1,Abl1,Tcf3,Sde2,H1f5,Prkd2,Shld2,Ube2b,Kmt5b,Apobec3,Spo11,Nabp1,H1f0,Emsy,Apbb1,Huwe1,Rrm2b,Fan1,Prim2,Nsd2,Ap5s1,Nipbl,Kmt5c,Brpf3,Smarcc2,Smarcd1,Stn1,Polh,Dtx3l,Rnf169,E2f7,Paxip1,Adipoq,Ppp4r2,Pot1a,Rpa1,Sfpq,Xrcc1,Kin,Mbd4,Uimc1,Ube2a,Zmynd8,Ccdc117,Tep1,Xrn2,Pole,Kif22,Tinf2,D…
ADAPTIVE IMMUNE RESPONSE (GO: BP)	5.14992e-06	0.00059224	0.610527	0.340648	1.5711	451	Cd79b,Cd79a,Cd19,Bach2,Irf4,Lef1,Igll1,Slamf7,Slamf6,Rag1,Pik3cd,Serpina3g,Il7r,Rsad2,Siglecg,Unc93b1,Dpp4,Ighm,H2-Eb1,Lax1,Inpp5d,Klhl6,Mef2c,Prkd2,Gpr183,Shld2,Arid5a,Iglc3,Csf2rb2,Ighd,Prkcb,Kmt5b,Traf3ip2,H2-Ab1,Rftn1,Dusp22,Nsd2,Kmt5c,Syk,Otud5,Tnfaip3,Paxip1,Il17ra,Prkcz,Lyn,H2-Aa,Socs5,Fyn,H2-T23,Cd274,Irf1,Cd1d1,Serpinb9,Pnp,Gimap5,Il12a,Brd2,Marchf8,Hmgb1,Msh2,Mtor,Sirt1,Sla2,Fbxo38,Dclr…
POSITIVE REGULATION OF CELL ACTIVATION (GO: BP)	9.92474e-05	0.0067079	0.538434	0.345372	1.5683	365	Slc4a1,Lef1,Smarca4,Sox4,Rag1,Jund,Xrcc6,Gpam,Bst1,Il7r,H2-Oa,H2-Ob,Dpp4,Ighm,H2-Eb1,Hes1,Inpp5d,Abl1,Cd38,Mef2c,Tcf3,Gpr183,Shld2,Ttbk1,Ighd,Il16,Kmt5b,H2-Ab1,Rhoh,Pear1,Carmil2,Nsd2,Spta1,Irs2,Kmt5c,Smarcc2,Card11,Smarcd1,Il1rl2,Syk,Paxip1,Prkcz,H2-Aa,Socs5,Wnt10b,Cd5,Klhl25,Tespa1,Selp,Gas6,Cd274,Ccl5,Irf1,Cd1d1,Itpkb,Vav3,Pnp,Gimap5,Il12a,Efnb3,Brd2,Hmgb1,Msh2,Il2ra,Shb,Fcho1,Atad5,Tnfsf14,Ct…
LEUKOCYTE PROLIFERATION (GO: BP)	0.000125595	0.00735942	0.518848	0.345475	1.55831	348	Vpreb1b,Cd79a,Cd19,Slc4a1,Vpreb1a,Lef1,Slamf6,Bcl2l1,Gpam,Bst1,St6gal1,Il7r,Rag2,Cd37,Siglecg,Ighm,Cd22,Hes1,Inpp5d,Abl1,Cd38,Mef2c,Tcf3,Gpr183,Csf2rb2,Sdc4,Ighd,Impdh1,Carmil2,Spta1,Irs2,Card11,Syk,Lyn,H2-Aa,Fyn,Cd274,Ccl5,Irf1,Cd1d1,Vav3,Gal,Pnp,Il12a,Itch,Hmgb1,Fkbp1a,Bap1,Mzb1,Enpp3,Il2ra,Shb,Lmbr1l,Cblb,Atad5,Zc3h12d,Casp3,Scrib,Alkbh5,Dock2,Il12rb1,Ccr2,Tgfb1,Rc3h2,Tnfrsf9,Prlr,Clec2i,Armc5…
IMMUNE SYSTEM DEVELOPMENT (GO: BP)	0.00088213	0.0298728	0.477271	0.364153	1.55598	210	Lef1,Rag1,Xrcc6,Il7r,Rag2,Cxcr5,Foxp1,Ezh2,Hes1,Phlpp1,Abl1,Tcf3,Shld2,Kmt2a,Ighd,Epb42,Kmt5b,Traf3ip2,Carmil2,Nsd2,Kmt5c,Tnfaip3,Paxip1,Nfkb1,Lyn,Cd2ap,Cd274,Ccnb2,Itch,Hmgb1,Msh2,Il2ra,Cblb,Dclre1c,Apc,Atad5,Srf,Nhej1,Prkdc,Tgfb1,Rc3h2,Pcid2,Tgfbr2,Myb,Pdcd1,Rc3h1,Rbm15,Nfkb2,Msh3,Atm,Tcf7,Zbtb1,Adar,Exosc3,Ccr7,Sanbr,Psen2,Il4,Swap70,Dcaf1,Smad3,Clcf1,Aire,Crkl,Mad2l2,Stat5b
IMMUNE RESPONSE REGULATING CELL SURFACE RECEPTOR SIGNALING PATHWAY (GO: BP)	0.000537474	0.0206032	0.477271	0.348956	1.53063	266	Cd79b,Cd79a,Cd19,Blnk,Plcg1,Pde4b,Wdfy1,Foxp1,Ighm,Lax1,Cd22,Klhl6,Abl1,Cd38,Mef2c,Prkd2,Prkch,Blk,Traf3,Prkcb,Pik3ap1,Themis2,Rftn1,Scimp,Dusp22,Carmil2,Elf1,Card11,Syk,Ifi35,Tnfaip3,Nfkb1,Lyn,Cd2ap,Fyn,Tespa1,Sh2b2,Znrf1,Vav3,Tax1bp1,Hmgb1,Eif2b2,Sla2,Khdrbs1,Shb,Cblb,Fcho1,Pik3r1,Rc3h2,Eif2b5,Ube2n,Stap1,Lpxn,Clec2i,Ly96,Nfatc2,Tlr1,Rc3h1,Tnip3,Wnk1,Nr1d1,Oscar,Fcmr,Cd8a,Ccr7,Nmi,Tec,Bag6,Psen…
REGULATION OF MRNA METABOLIC PROCESS (GO: BP)	0.000557518	0.0210572	0.477271	0.345895	1.5244	273	Hdac7,Tent5c,Zfp36l1,Btg2,Apobec1,Cnot6l,Rbm5,Traf3ip2,Tia1,Igf2bp3,Tut4,Rbm38,Mettl14,Ptbp3,Pum1,Tra2a,Sf1,Rbm11,Dyrk1a,Cpeb3,Nrde2,Tra2b,Mtor,Sfswap,Srsf4,Khdrbs1,Rbm3,Snw1,Srpk3,Zc3h12d,Srsf10,Tent4b,Dhx36,Ago2,Alkbh5,Rc3h2,Pcid2,Fip1l1,Thrap3,U2af2,Apex1,Mettl16,Rbm47,Hnrnpr,Patl1,Rc3h1,Rbm15,Tnrc6b,Tut7,Nanos3,Rbm15b,Gigyf2,Tnrc6a,Caprin1,Parn,Cnot1,Dcp2,Patl2,Cnot6,Traf5,Pan2,Exosc3,Ythdf3,…
T CELL ACTIVATION (GO: BP)	1.61146e-05	0.00155204	0.57561	0.323408	1.5195	553	Slc4a1,Irf4,Lef1,Slamf7,Slamf6,Smarca4,Gimap1,Wdfy4,Sox4,Rag1,Gpam,Il7r,Rag2,Cd37,Zfp36l1,H2-Oa,H2-Ob,Rsad2,Nrarp,Foxp1,Dpp4,H2-Eb1,Lax1,Gpr18,Hes1,Abl1,Tcf3,Prex1,Gpr183,Kmt2a,Sdc4,Lfng,Traf3ip2,H2-Ab1,Cd48,Ifnar1,Dcaf12,Dusp22,Rhoh,Carmil2,Spta1,Smarcc2,Card11,Smarcd1,Il1rl2,Syk,Otud5,Prkcz,H2-Aa,Socs5,Wnt10b,Cd5,Fyn,Klhl25,Tespa1,Cd274,Ccl5,Irf1,Cd1d1,Itpkb,Pnp,Adora2a,Gimap5,Il12a,Efnb3,Brd2,…
CELL ACTIVATION (GO: BP)	6.48627e-08	1.95425e-05	0.704976	0.308514	1.51768	1050	Vpreb1b,Cd79b,Cd79a,Cd19,Blnk,Slc4a1,Vpreb1a,Irf4,Pou2af1,Lef1,Slamf7,Slamf6,Smarca4,Gimap1,Wdfy4,Sox4,Cplx2,Hdac7,Rag1,Tcf4,Jund,Xrcc6,Gpam,Pik3cd,Bst1,Tpd52,Il7r,Evl,Rag2,Snca,Cd37,Zfp36l1,Hdac5,H2-Oa,H2-Ob,Tbc1d10c,Rsad2,Nrarp,Cxcr5,Mmrn1,Foxp1,Siglecg,Spib,Bcr,Syvn1,Ezh2,Dpp4,Ighm,H2-Eb1,Lax1,Cxcl10,Gpr18,Cd22,Hes1,Inpp5d,Abl1,Cd38,Mef2c,Tcf3,Prex1,Gpr183,Shld2,Ttbk1,Kmt2a,Sdc4,Ighd,Il16,Prkc…
CHROMOSOME SEGREGATION (GO: BP)	0.000124305	0.00735942	0.518848	0.330859	1.50859	388	Bcl7a,Smarca4,Msh5,Arhgef10,Rrs1,Ube2b,Spo11,Stag3,Nipbl,Bex4,Smarcc2,Smarcd1,Dlgap5,Pum1,Stard9,Syce2,Stag1,Ctcf,Bub1b,Ncapd3,Rcc2,Cenpf,Haus7,Mau2,Kif22,Ncapg2,Ccnb2,Mei4,Top2b,Uvrag,Pmf1,Rnf212,Sirt1,Cenpi,Mki67,Firrm,Ccdc69,Kif14,Mad2l1bp,Stil,Cdc20,Apc,Cep97,Mybl2,Spdl1,Ccne2,Ect2,Brca1,Smarcc1,Ago4,Cenpt,Smarca5,Sass6,Chfr,Pcid2,Sgo1,Stag2,Cenps,Ndc80,Smarce1,Trappc12,Haspin,Uhrf1,Aurkb,Ehm…
NEGATIVE REGULATION OF CELL CYCLE PROCESS (GO: BP)	0.00109011	0.0349922	0.45506	0.340734	1.50835	289	Zfp36l1,Ezh2,Sde2,Foxo4,Gjc2,Nabp1,Clock,Ctdsp2,Apbb1,Mtbp,Susd2,Mbtps1,Esr1,Tom1l1,Dtx3l,Rbm38,E2f7,Trim39,Crlf3,Lyn,Mbd4,Uimc1,Bub1b,Syf2,Foxn3,Cradd,E2f8,Ccp110,Trrap,Ppp2r3d,Men1,Msh2,Sirt1,Ufl1,Mad2l1bp,Gpr132,Stil,Cdc20,Apc,Hinfp,Zc3h12d,Spdl1,Nubp1,Brca1,Mus81,Smarca5,Prkdc,Ints3,Chfr,Eme2,Pcid2,Nae1,Ccnf,Chek1,Mdc1,Ndc80,Cul4a,Haspin,Aurkb,Chek2,Inip,Gpr15lg,Gigyf2,Trip13,Zwilch,Wdr76,Rps…
REGULATION OF CHROMOSOME ORGANIZATION (GO: BP)	0.00170976	0.0473874	0.45506	0.345441	1.49838	237	Bcl7a,Smarca4,Gch1,Parp1,Resf1,H3f3a,Smarcc2,Smarcd1,Stn1,Pot1a,Sfpq,Xrcc1,Bub1b,Tinf2,Ino80b,Map3k4,Pot1b,Sirt1,Mad2l1bp,Cdc20,Apc,Tent4b,Spdl1,Dhx36,Smarcc1,Smarca5,Chfr,Pcid2,Mphosph8,Ndc80,Smarce1,Trappc12,Pif1,Haspin,Aurkb,Slx4,Smarcb1,Pbrm1,Smg1,Tnks2,Trip13,Zwilch,Atm,Parn,Dcp2,Rad21,Cdk2,Smg6,Nat10,Kat2b,Actl6a,Ino80,Ncapd2,Nek2,Ncaph,Smc5,Ylpm1,Mcph1,Hnrnpu,Tal1,Dync1li1,Bub1,Incenp,Cdk5…
POSITIVE REGULATION OF LEUKOCYTE CELL CELL ADHESION (GO: BP)	0.00115993	0.0361832	0.45506	0.341856	1.49714	258	Slc4a1,Lef1,Smarca4,Sox4,Rag1,Gpam,Il7r,H2-Oa,H2-Ob,Dpp4,H2-Eb1,Itga4,Hes1,Abl1,H2-Ab1,Rhoh,Carmil2,Spta1,Smarcc2,Card11,Smarcd1,Il1rl2,Syk,Gcnt1,Prkcz,H2-Aa,Socs5,Wnt10b,Cd5,Klhl25,Tespa1,Selp,Cd274,Ccl5,Irf1,Cd1d1,Itpkb,Pnp,Gimap5,Il12a,Efnb3,Brd2,Hmgb1,Il2ra,Shb,Fcho1,Tnfsf14,Smarcc1,Il12rb1,Ccr2,Tgfb1,Icam1,Socs1,Gimap3,Tgfbr2,Smarce1,Ambra1,Smarcb1,Pbrm1,Brd4,Cd24a,Zbtb1,Sart1,Ccr7,Actl6a,Il…
POSITIVE REGULATION OF IMMUNE SYSTEM PROCESS (GO: BP)	5.25492e-07	0.00010655	0.659444	0.304414	1.49298	1023	Cd79b,Cd79a,Cd19,Blnk,Slc4a1,Irf4,Lef1,Slamf6,Tifa,Smarca4,Sox4,Rag1,Jund,Xrcc6,Gpam,Plcg1,Pik3cd,Bst1,Gbp7,Il7r,Ifi203,Cd37,Zfp36l1,H2-Oa,H2-Ob,Rsad2,Mndal,Pde4b,Wdfy1,Gbp3,Gramd4,Foxp1,Unc93b1,Pecam1,Pgf,Dpp4,Ighm,Nlrc5,H2-Eb1,Irf5,Lax1,Cxcl10,Itga4,Cd22,Hes1,Parp1,Inpp5d,Klhl6,Abl1,Cd38,Tmem64,Mef2c,Tcf3,Gprc5b,Prkd2,Gpr183,Shld2,Rptor,Arid5a,Prkch,Ttbk1,Aim2,Blk,Ighd,Il16,Traf3,Pspc1,Prkcb,Km…
POSITIVE REGULATION OF IMMUNE RESPONSE (GO: BP)	1.20252e-05	0.00123539	0.593325	0.309978	1.48851	682	Cd79b,Cd79a,Cd19,Blnk,Irf4,Slamf6,Tifa,Xrcc6,Plcg1,Gbp7,Ifi203,H2-Oa,H2-Ob,Rsad2,Mndal,Pde4b,Wdfy1,Gbp3,Gramd4,Foxp1,Unc93b1,Dpp4,Ighm,Nlrc5,H2-Eb1,Lax1,Cd22,Parp1,Klhl6,Abl1,Cd38,Mef2c,Prkd2,Shld2,Arid5a,Prkch,Aim2,Blk,Traf3,Pspc1,Prkcb,Kmt5b,Pik3ap1,Zcchc3,H2-Ab1,Themis2,Rftn1,Scimp,Dusp22,Carmil2,Washc4,Nsd2,Cd36,Trim30a,Elf1,Esr1,Kmt5c,Trim56,Card11,Syk,Zdhhc5,Ifi35,Tnfaip3,Paxip1,Nfkb1,Prkcz…
REGULATION OF CELL CYCLE PHASE TRANSITION (GO: BP)	0.000195833	0.00986207	0.518848	0.322954	1.48669	419	Bcl7a,Smarca4,Cdc25b,Zfp36l1,Ezh2,Camk2d,Tcf3,Sde2,Foxo4,Rptor,Gjc2,Nabp1,Clock,Ctdsp2,Apbb1,Mtbp,Rrm2b,Susd2,Mbtps1,Smarcc2,Smarcd1,Cdkn2c,Dtx3l,Rbm38,E2f7,Trim39,Paxip1,Crlf3,Lyn,Wnt10b,Atp2b4,Mbd4,Uimc1,Bub1b,Kcna5,Syf2,Foxn3,Rcc2,Cenpf,Kmt2e,Cradd,Cdkn1b,Dbf4,Ubd,Trrap,Ppp2r3d,Men1,Msh2,Ufl1,Kif14,Rrm2,Mad2l1bp,Gpr132,Stil,Cdc20,Apc,Atad5,Hinfp,Zc3h12d,Spdl1,Tfap4,Ccne2,Brca1,Smarcc1,Mus81,Pr…
EPIGENETIC REGULATION OF GENE EXPRESSION (GO: BP)	0.00168742	0.0472784	0.45506	0.339644	1.48656	247	Smarca4,Hdac11,Ezh2,H2az2,Baz2a,Apobec1,Kmt2a,Phf19,Macroh2a2,H1f0,Resf1,H2ac8,Phf2,H3f3a,Smarcd1,Dnmt3a,Cbx3,H2ac11,Uhrf2,Ctcf,Pik3ca,Dyrk1a,Kmt2e,Nrde2,Smchd1,Atad2,Men1,Hmgb1,Sirt1,H2ac20,Xist,Lhx2,Jpx,Ezh1,Cdyl,Brca1,H2al1m,Smarca5,Mphosph8,Mta1,Chek1,Apex1,Epc1,Uhrf1,Hells,Kmt2d,Ehmt2,Samd1,Ehmt1,H2ac4,Smarcb1,Rbm15,Lmnb1,Rbm15b,Fkbp6,Rlim,H2ac25,Ogg1,Cdk2,Phf8,Ddx4,Usp7,Hdac9,Ash2l,Axin1,Mt…
NEGATIVE REGULATION OF CELL CYCLE (GO: BP)	0.0008358	0.0288402	0.477271	0.327147	1.48209	362	Zfp36l1,Ezh2,Btg2,Btg1,Plaat3,Abl1,Sde2,Foxo4,Gjc2,Nabp1,Clock,Ctdsp2,Ppp1r13b,Apbb1,Mtbp,Susd2,Mbtps1,Esr1,Tom1l1,Cdkn2c,Dtx3l,Rbm38,E2f7,Trim39,Tnfaip3,Crlf3,Lyn,Mbd4,Uimc1,Bub1b,Syf2,Foxn3,Cradd,Cdkn1b,E2f8,Ccp110,Trrap,Ppp2r3d,Men1,Msh2,Sirt1,Ufl1,Mad2l1bp,Gpr132,Stil,Cdc20,Apc,Hinfp,Zc3h12d,Casp3,Spdl1,Tfap4,Scrib,Nubp1,Brca1,Mus81,Smarca5,Prkdc,Ints3,Tgfb1,Chfr,Hexim1,Eme2,Pcid2,Cdk5rap1,Na…
NEGATIVE REGULATION OF NUCLEOBASE CONTAINING COMPOUND METABOLIC PROCESS (GO: BP)	5.98563e-08	1.95425e-05	0.704976	0.296358	1.48174	1301	Slc4a1,Bach2,Pax5,Lef1,Smarca4,Sox4,Hdac7,Tcf4,Tfdp2,Jund,Xrcc6,Tent5c,Mxd4,Usp3,Hdac5,Samd11,Neil1,Nrarp,Elk4,Fbp1,Ddit4,Acvr2b,Ppp1r15a,Foxp1,Otub2,Ezh2,Supt4a,Id3,Fabp4,Hbp1,Sufu,Baz2a,Hes1,Parp1,Btg2,Sox6,Tcf7l2,Apobec1,Abl1,Nfkbie,Cd38,Mef2c,Bin1,Tcf3,Hmg20a,H1f5,Pkig,Bmal1,Mnt,Shld2,Arid5a,Zbtb10,Lbh,Phf19,Cbx2,Hes5,Pspc1,Zfp706,Bcl6b,Apobec3,Macroh2a2,H1f0,Clock,Fnip2,Traf3ip2,Dusp5,Apbb1,…
ACTIVATION OF IMMUNE RESPONSE (GO: BP)	0.000132365	0.00755459	0.518848	0.317295	1.47791	500	Cd79b,Cd79a,Cd19,Blnk,Irf4,Tifa,Xrcc6,Plcg1,Gbp7,Ifi203,Rsad2,Mndal,Pde4b,Wdfy1,Gbp3,Gramd4,Foxp1,Unc93b1,Ighm,Lax1,Cd22,Parp1,Klhl6,Abl1,Cd38,Mef2c,Prkd2,Prkch,Aim2,Blk,Traf3,Pspc1,Prkcb,Pik3ap1,Zcchc3,Themis2,Rftn1,Scimp,Dusp22,Carmil2,Washc4,Cd36,Trim30a,Elf1,Esr1,Card11,Syk,Zdhhc5,Ifi35,Tnfaip3,Nfkb1,Pum1,Lyn,Ifi209,Sfpq,Cd2ap,Fyn,Tespa1,Sting1,Mavs,Sh2b2,Gbp2,Cd274,Casp4,Irf1,Znrf1,Vav3,Tax1…
RESPONSE TO VIRUS (GO: BP)	0.00120928	0.0372701	0.45506	0.330464	1.47666	320	Pou2af1,Wdfy4,Bcl2l1,Gpam,Gbp7,Cd37,Rsad2,Ddit4,Unc93b1,Isg15,Trim26,Irf5,Cxcl10,Ivns1abp,Apobec1,Serinc3,Bnip3l,Aim2,Ifitm1,Traf3,Apobec3,Zcchc3,Ifi27l2a,Traf3ip2,Ifnar1,Trim30a,Shfl,Trim56,Zmynd11,Dtx3l,Nfkb1,Il17ra,Cd2ap,Marchf2,Stat2,Sting1,Mavs,Mapk11,Ncbp3,Ccl5,Irf1,Dus2,Serinc5,Il12a,Mx2,Itch,Exosc5,Map3k14,Pou2f2,Zbp1,Traf3ip3,Uri1,Dhx36,Il12rb1,Tgfb1,Ube2n,Armc5,Ddx21,Trim5,Usp27x,Cxcl9,…
NUCLEAR CHROMOSOME SEGREGATION (GO: BP)	0.00110649	0.0350844	0.45506	0.333269	1.47416	288	Bcl7a,Smarca4,Msh5,Arhgef10,Rrs1,Ube2b,Spo11,Stag3,Nipbl,Smarcc2,Smarcd1,Syce2,Stag1,Bub1b,Ncapd3,Rcc2,Cenpf,Kif22,Ncapg2,Ccnb2,Mei4,Top2b,Pmf1,Rnf212,Sirt1,Cenpi,Kif14,Mad2l1bp,Cdc20,Apc,Cep97,Mybl2,Spdl1,Ccne2,Ect2,Smarcc1,Ago4,Smarca5,Chfr,Pcid2,Sgo1,Stag2,Ndc80,Smarce1,Trappc12,Haspin,Uhrf1,Aurkb,Ehmt2,Mnd1,Aspm,Chek2,Ska2,Smarcb1,Pbrm1,Kifc5b,Kif2c,Bccip,Cdca5,Prc1,Trip13,Zwilch,Atm,Fancd2,R…
REGULATION OF MITOTIC CELL CYCLE PHASE TRANSITION (GO: BP)	0.000967536	0.0319951	0.477271	0.326264	1.46104	330	Bcl7a,Smarca4,Cdc25b,Zfp36l1,Ezh2,Camk2d,Tcf3,Sde2,Foxo4,Rptor,Gjc2,Nabp1,Ctdsp2,Mtbp,Rrm2b,Mbtps1,Smarcc2,Smarcd1,Cdkn2c,Rbm38,E2f7,Trim39,Crlf3,Wnt10b,Mbd4,Uimc1,Bub1b,Kcna5,Syf2,Foxn3,Rcc2,Cenpf,Kmt2e,Cradd,Cdkn1b,Dbf4,Ubd,Ppp2r3d,Men1,Kif14,Rrm2,Mad2l1bp,Gpr132,Stil,Cdc20,Apc,Atad5,Zc3h12d,Spdl1,Tfap4,Ccne2,Brca1,Smarcc1,Prkdc,Ints3,Tgfb1,Sass6,Chfr,Pcid2,Nae1,Chek1,Ndc80,Cul4a,Apex1,Smarce1,…
REGULATION OF LEUKOCYTE DIFFERENTIATION (GO: BP)	0.00117137	0.0362467	0.45506	0.323195	1.45224	334	Lef1,Smarca4,Sox4,Rag1,Xrcc6,Il7r,Rag2,Zfp36l1,H2-Oa,Prxl2a,Nrarp,Foxp1,Inpp5d,Abl1,Tmem64,Rptor,Rhoh,Carmil2,Smarcc2,Card11,Smarcd1,Il1rl2,Syk,Adipoq,Prkcz,Lyn,H2-Aa,Socs5,Wnt10b,Klhl25,Tespa1,Gas6,Ccl5,Irf1,Cd1d1,Itpkb,Pnp,Gimap5,Il12a,Brd2,Tjp2,Hmgb1,Gpr55,Mtor,Il2ra,Shb,Apc,Creb1,Pik3r1,Smarcc1,Prkdc,Nedd9,Ccr2,Tgfb1,Rc3h2,Pcid2,Socs1,Clec2d,Gimap3,Clec2i,Cul4a,Tgfbr2,Smarce1,Ambra1,Smarcb1,P…
NEGATIVE REGULATION OF RNA BIOSYNTHETIC PROCESS (GO: BP)	3.29839e-06	0.000423568	0.627257	0.292688	1.44489	1079	Bach2,Pax5,Lef1,Smarca4,Sox4,Hdac7,Tcf4,Tfdp2,Jund,Xrcc6,Mxd4,Usp3,Hdac5,Samd11,Nrarp,Elk4,Fbp1,Acvr2b,Ppp1r15a,Foxp1,Ezh2,Supt4a,Id3,Fabp4,Hbp1,Sufu,Baz2a,Hes1,Parp1,Btg2,Sox6,Tcf7l2,Nfkbie,Cd38,Mef2c,Bin1,Tcf3,Hmg20a,H1f5,Pkig,Bmal1,Mnt,Arid5a,Zbtb10,Lbh,Phf19,Cbx2,Hes5,Pspc1,Zfp706,Bcl6b,Apobec3,Macroh2a2,Clock,Fnip2,Dusp5,Apbb1,Wdr82,Tgif1,Cbx7,Dusp22,Nsd2,Nipbl,Sema4d,Resf1,Cd36,Crebrf,Esr1,…
MRNA METABOLIC PROCESS (GO: BP)	8.54947e-05	0.00609941	0.538434	0.301104	1.44132	674	Hdac7,Tent5c,Zfp36l1,Pnrc1,Slfn14,Cpsf2,Cnot10,Btg2,Apobec1,Sde2,Cnot6l,S100a10,Rbm5,Rbm17,Traf3ip2,Tia1,Igf2bp3,Tut4,Rbm38,Mettl14,Wbp11,Ppp4r2,Ptbp3,Pum1,Rbm27,Sfpq,Crnkl1,Kin,Cir1,Tra2a,Sf1,Usp25,Rbm11,Syf2,Ncbp3,Xrn2,Dyrk1a,Cpeb3,Nrde2,Prpf38b,Tra2b,Alyref2,Rbm48,Ddx46,Mtor,Sfswap,Tsen15,Exosc5,Srsf4,Hnrnpul1,Khdrbs1,Hnrnph1,Rbm3,Snw1,Ramac,Sart3,Zfp326,Creb1,Luc7l3,Srpk3,Zc3h12d,Srsf10,Tent4…
MRNA PROCESSING (GO: BP)	0.000248233	0.0116724	0.498493	0.310903	1.43437	450	Hdac7,Zfp36l1,Cpsf2,Apobec1,Sde2,Cnot6l,Rbm5,Rbm17,Tia1,Rbm38,Mettl14,Wbp11,Ppp4r2,Ptbp3,Rbm27,Sfpq,Crnkl1,Kin,Cir1,Tra2a,Sf1,Rbm11,Syf2,Ncbp3,Xrn2,Dyrk1a,Nrde2,Prpf38b,Tra2b,Alyref2,Rbm48,Ddx46,Sfswap,Tsen15,Srsf4,Hnrnpul1,Khdrbs1,Hnrnph1,Rbm3,Snw1,Ramac,Sart3,Zfp326,Luc7l3,Srpk3,Srsf10,Tent4b,Dhx36,Cwc22,Strap,Alkbh5,Cwc25,Cpsf6,Fip1l1,Thrap3,Cdc40,U2af2,Mettl16,Rbm47,Prpf3,Chd8,Ttf2,Wbp4,Zcchc…
IMMUNE RESPONSE REGULATING SIGNALING PATHWAY (GO: BP)	0.00109904	0.0349922	0.45506	0.307111	1.42189	445	Cd79b,Cd79a,Cd19,Blnk,Irf4,Tifa,Plcg1,Rsad2,Pde4b,Wdfy1,Gramd4,Foxp1,Unc93b1,Ighm,Lax1,Cd22,Parp1,Klhl6,Abl1,Cd38,Mef2c,Prkd2,Prkch,Aim2,Blk,Traf3,Prkcb,Pik3ap1,Zcchc3,Themis2,Rftn1,Scimp,Dusp22,Carmil2,Washc4,Cd36,Trim30a,Elf1,Esr1,Card11,Syk,Zdhhc5,Ifi35,Tnfaip3,Nfkb1,Pum1,Lyn,Cd2ap,Fyn,Tespa1,Sting1,Mavs,Sh2b2,Gbp2,Cd274,Casp4,Irf1,Znrf1,Vav3,Tax1bp1,Itch,Hmgb1,Eif2b2,Nlrc3,Sla2,Khdrbs1,Shb,Cb…
POST TRANSLATIONAL PROTEIN MODIFICATION (GO: BP)	3.90522e-05	0.00307038	0.557332	0.292965	1.41728	811	Sox4,Rag1,Ube2o,Trim10,Stambpl1,Usp3,Isg15,Ube2l6,Trim26,Mylip,Otub2,Syvn1,Rnf157,Marchf5,Parp1,Klhl24,Ivns1abp,Abl1,Hmg20b,Otud1,Sde2,Hmg20a,Rnf114,Traf3,Wipi2,Ube2b,Prkcb,Atg4a,Usp19,Rnf122,Ube2h,Traf3ip2,Pcmtd1,Sae1,Huwe1,Mtbp,Map3k1,Herc6,Dnaja1,Bex4,Trim30a,Herpud1,Trim56,Rnf187,Dtx3l,Otud5,Trim39,Tnfaip3,Paxip1,Btrc,Ube2d1,Uhrf2,Tpst1,Mkrn1,Fyn,Marchf2,Klhl25,Fbxo32,Usp25,Ube2a,Znrf1,Klhl20…
REGULATION OF CELL ACTIVATION (GO: BP)	0.000135458	0.00767431	0.518848	0.298848	1.4172	601	Cd19,Slc4a1,Lef1,Slamf7,Smarca4,Sox4,Rag1,Jund,Xrcc6,Gpam,Bst1,Il7r,Rag2,Snca,Cd37,Zfp36l1,H2-Oa,H2-Ob,Tbc1d10c,Nrarp,Mmrn1,Siglecg,Dpp4,Ighm,H2-Eb1,Lax1,Cd22,Hes1,Inpp5d,Abl1,Cd38,Mef2c,Tcf3,Gpr183,Shld2,Ttbk1,Sdc4,Ighd,Il16,Kmt5b,H2-Ab1,Themis2,Dusp22,Rhoh,Pear1,Carmil2,Nsd2,Spta1,Irs2,Kmt5c,Smarcc2,Card11,Smarcd1,Il1rl2,Syk,Tnfaip3,Paxip1,Prkcz,Lyn,H2-Aa,Socs5,Wnt10b,Cd5,Klhl25,Tespa1,Selp,Gas…
NEGATIVE REGULATION OF TRANSCRIPTION BY RNA POLYMERASE II (GO: BP)	0.000107545	0.00686348	0.538434	0.289393	1.40205	820	Bach2,Pax5,Lef1,Smarca4,Sox4,Hdac7,Tcf4,Jund,Mxd4,Usp3,Hdac5,Samd11,Nrarp,Elk4,Fbp1,Acvr2b,Ppp1r15a,Foxp1,Ezh2,Supt4a,Id3,Hbp1,Sufu,Hes1,Parp1,Btg2,Sox6,Tcf7l2,Mef2c,Bin1,Tcf3,Hmg20a,H1f5,Pkig,Mnt,Arid5a,Zbtb10,Phf19,Cbx2,Hes5,Bcl6b,Macroh2a2,Fnip2,Apbb1,Tgif1,Cbx7,Dusp22,Nsd2,Nipbl,Sema4d,Cd36,Crebrf,Esr1,Smarcc2,Etv5,Zfp354b,Tbx6,E2f7,Pde2a,Nfkb1,Chd3,Zeb2,Dnmt3a,Sfpq,Wnt10b,Cir1,Pcbp3,Ctcf,Zmy…
REGULATION OF CELL CYCLE PROCESS (GO: BP)	0.000100825	0.00674795	0.538434	0.292453	1.40199	684	Bcl7a,Lef1,Smarca4,Bcl2l1,Cdc25b,Zfp36l1,Cxcr5,Ezh2,Camk2d,Bin1,Tcf3,Sde2,Foxo4,Sh3glb1,Rptor,Cep250,Gjc2,Ube2b,Usp19,Nabp1,Clock,Ctdsp2,Camk2b,Apbb1,Mtbp,Rrm2b,Phip,Susd2,Mbtps1,Esr1,Tom1l1,Smarcc2,Smarcd1,Cdkn2c,Dtx3l,Rbm38,E2f7,Trim39,Paxip1,Crlf3,Pum1,Lyn,Sfpq,Wnt10b,Atp2b4,Cep76,Mbd4,Uimc1,Bub1b,Kcna5,Syf2,Foxn3,Ncapd3,Rcc2,Cenpf,Wdr62,Kmt2e,Cradd,Cdkn1b,E2f8,Ccp110,Ncapg2,Uvrag,Dbf4,Ubd,Trr…
POSITIVE REGULATION OF NUCLEOBASE CONTAINING COMPOUND METABOLIC PROCESS (GO: BP)	2.0631e-07	5.27767e-05	0.690132	0.275283	1.39079	1743	Ebf1,Bcl7a,Ablim1,Foxo1,Wwox,Pax5,Irf4,Pou2af1,Lef1,Smarca4,Sox4,Tcf4,Tfdp2,Chchd10,Bcl2l1,Jund,Xrcc6,Gch1,Zfp36l1,Hdac5,Hivep2,Csrnp1,Pim1,Elk4,Ppp1r15a,Foxp1,Spib,Bicra,Lpin2,Itgb1bp1,Nlrc5,Map3k5,Supt4a,Irf5,Camk2d,Hes1,Parp1,Btg2,Bcl9,Sox6,Tcf7l2,Apobec1,Hivep3,Cd38,Mef2c,Tcf3,Foxo4,Bmal1,Prkd2,Cnot6l,Bcas3,Shld2,Rptor,Arid5a,Zkscan17,Rxrb,S100a10,Lbh,Banp,Kmt2a,Myo1c,Bcl9l,Hes5,Ube2b,Mef2d,K…
PROTEIN MODIFICATION BY SMALL PROTEIN CONJUGATION (GO: BP)	0.000340666	0.0144912	0.498493	0.288792	1.379	653	Sox4,Rag1,Ube2o,Trim10,Isg15,Ube2l6,Trim26,Mylip,Syvn1,Rnf157,Marchf5,Klhl24,Ivns1abp,Abl1,Hmg20b,Sde2,Hmg20a,Rnf114,Traf3,Ube2b,Rnf122,Ube2h,Traf3ip2,Pcmtd1,Sae1,Huwe1,Mtbp,Map3k1,Herc6,Dnaja1,Bex4,Trim30a,Herpud1,Trim56,Rnf187,Dtx3l,Trim39,Tnfaip3,Paxip1,Btrc,Ube2d1,Uhrf2,Mkrn1,Fyn,Marchf2,Klhl25,Fbxo32,Ube2a,Znrf1,Klhl20,Hectd1,Nscme3l,Ube2j1,Cbll1,Fbxo33,Ube4b,Rnf227,Cdc26,Ubd,Marchf8,Zmiz2,I…
POSITIVE REGULATION OF RNA METABOLIC PROCESS (GO: BP)	2.13256e-06	0.00030436	0.627257	0.273405	1.37063	1538	Ebf1,Ablim1,Foxo1,Wwox,Pax5,Irf4,Pou2af1,Lef1,Smarca4,Sox4,Tcf4,Tfdp2,Chchd10,Jund,Xrcc6,Zfp36l1,Hdac5,Hivep2,Csrnp1,Pim1,Elk4,Ppp1r15a,Foxp1,Spib,Bicra,Lpin2,Itgb1bp1,Nlrc5,Map3k5,Supt4a,Irf5,Hes1,Parp1,Btg2,Bcl9,Sox6,Tcf7l2,Apobec1,Hivep3,Cd38,Mef2c,Tcf3,Foxo4,Bmal1,Prkd2,Cnot6l,Bcas3,Rptor,Arid5a,Zkscan17,Rxrb,S100a10,Lbh,Banp,Kmt2a,Myo1c,Bcl9l,Hes5,Mef2d,Clock,E2f2,Tcf12,Apbb1,Mt3,Ifnar1,Phip…
REGULATION OF CELL CYCLE (GO: BP)	0.000129086	0.00742245	0.518848	0.279432	1.36886	984	Bcl7a,Lef1,Smarca4,Tfdp2,Bcl2l1,Jund,Cdc25b,Zfp36l1,Pim1,Cxcr5,Bcr,Ezh2,Camk2d,Hes1,Btg2,Btg1,Plaat3,Abl1,Bin1,Tcf3,Sde2,Foxo4,Bmal1,Mnt,Sh3glb1,Rptor,Cep250,Ttbk1,Gjc2,Ube2b,Madd,Usp19,Lfng,Nabp1,Clock,Ctdsp2,Camk2b,E2f2,Ppp1r13b,Apbb1,Mtbp,Rrm2b,Phip,Susd2,Mbtps1,Bex4,Ccng2,Esr1,Tom1l1,Smarcc2,Smarcd1,Cdkn2c,Dtx3l,Rbm38,E2f7,Trim39,Tnfaip3,Paxip1,Btrc,Dlgap5,Crlf3,Pum1,Zfp369,Lyn,Sfpq,Wnt10b,At…
CELLULAR RESPONSE TO STRESS (GO: BP)	2.2805e-06	0.000319477	0.627257	0.270855	1.3669	1701	Crhbp,Bcl7a,Foxo1,Hbb-bs,Bmf,Smarca4,Bpgm,Sox4,Bcl2l1,Scap,Xrcc6,Cat,Dntt,Uaca,Ypel3,Snca,Usp3,Gch1,Zfp36l1,Hdac5,Crip1,Neil1,Bbc3,Ddit4,Fech,Msh5,Pold4,Ppp1r15a,Eif2ak1,Foxp1,Otub2,Syvn1,Ezh2,Map3k5,Arpp21,Parp1,Btg2,Slc12a6,Tcf7l2,Serinc3,Abl1,Bnip3l,Mef2c,Sde2,Foxo4,Bmal1,Mnt,Sh3glb1,Shld2,Rptor,Prkch,Aim2,Dyrk2,Mtss1,Ficd,Pdk2,Shisa5,Wipi2,Ube2b,Rcsd1,Kmt5b,Usp19,Atg13,Spo11,Nabp1,Emsy,Clock,…
REGULATION OF IMMUNE RESPONSE (GO: BP)	0.000192079	0.00973664	0.518848	0.281264	1.36657	848	Cd79b,Cd79a,Cd19,Blnk,Irf4,Slamf6,Tifa,Xrcc6,Plcg1,Gbp7,Il7r,Ifi203,Cd37,H2-Oa,H2-Ob,Rsad2,Pim1,Mndal,Pde4b,Wdfy1,Gbp3,Gramd4,Foxp1,Siglecg,Unc93b1,Bcr,Isg15,Dpp4,Ighm,Nlrc5,H2-Eb1,Lax1,Cd22,Parp1,Inpp5d,Klhl6,Abl1,Cd38,Mef2c,Prkd2,Shld2,Arid5a,Prkch,Aim2,Blk,Ighd,Traf3,Pspc1,Prkcb,Kmt5b,Pik3ap1,Zcchc3,H2-Ab1,Themis2,Rftn1,Scimp,Dusp22,Carmil2,Washc4,Nsd2,Cd36,Trim30a,Elf1,Esr1,Kmt5c,Trim56,Card1…
CELL CYCLE PHASE TRANSITION (GO: BP)	0.00125966	0.0380537	0.45506	0.292226	1.36621	514	Bcl7a,Smarca4,Cdc25b,Zfp36l1,Eps8,Ezh2,Camk2d,Tcf3,Sde2,Foxo4,Rptor,Gjc2,Nabp1,Clock,Ctdsp2,Camk2b,Apbb1,Mtbp,Rrm2b,Susd2,Mbtps1,Ccng2,Smarcc2,Smarcd1,Cdkn2c,Npat,Dtx3l,Rbm38,E2f7,Trim39,Paxip1,Crlf3,Lyn,Wnt10b,Atp2b4,Mbd4,Uimc1,Bub1b,Kcna5,Ube2a,Syf2,Foxn3,Rcc2,Cenpf,Pole,Kmt2e,Cradd,Cdkn1b,Ccnb2,Dbf4,Ubd,Trrap,Ppp2r3d,Men1,Acvr1b,Msh2,Ufl1,Kif14,Rrm2,Mad2l1bp,Gpr132,Stil,Cdc20,Apc,Atad5,Hinfp,N…
REGULATION OF IMMUNE SYSTEM PROCESS (GO: BP)	5.87723e-06	0.00065629	0.610527	0.272188	1.36535	1471	Cd79b,Vpreb3,Cd79a,Cd19,Blnk,Slc4a1,Irf4,Lef1,Slamf7,Slamf6,Tifa,Smarca4,Sox4,Rag1,Jund,Xrcc6,Gpam,Plcg1,Ypel4,Pik3cd,Bst1,Gbp7,Il7r,Ifi203,Rag2,Snca,Cd37,Zfp36l1,H2-Oa,H2-Ob,Tbc1d10c,Prxl2a,Rsad2,Nrarp,Pim1,Mndal,Pde4b,Wdfy1,Gbp3,Gramd4,Foxp1,Siglecg,Unc93b1,Bcr,Pecam1,Isg15,Pgf,Dpp4,Ighm,Nlrc5,H2-Eb1,Irf5,Lax1,Cxcl10,Itga4,Gpr18,Cd22,Hes1,Parp1,Inpp5d,Phlpp1,Klhl6,Abl1,Cd38,Tmem64,Mef2c,Tcf3,Gp…
MULTICELLULAR ORGANISMAL LEVEL HOMEOSTASIS (GO: BP)	0.000313618	0.0136521	0.498493	0.281859	1.36336	812	Hba-a2,Vpreb1b,Alas2,Hba-a1,Slc4a1,Hbb-bs,Vpreb1a,Irf4,Smarca4,Bpgm,Sox4,Slc1a5,Rag1,Slc12a3,Gpam,Ypel4,Pik3cd,Trim10,Il7r,Chst3,Il10ra,Zfp36l1,Elovl6,Alpl,Fech,Dmtn,Pde4b,Acvr2b,Eif2ak1,Bcr,Isg15,Ezh2,Fabp4,Rhag,Inpp5d,Sox6,Abl1,Cd38,Tmem64,Mef2c,Tcf3,Bmal1,Gpr183,Acp5,Aim2,Kmt2a,Pask,Adgrg1,Epb42,Slc27a1,Traf3ip2,Carmil2,Cd36,Spta1,Card11,Syk,Tnfaip3,Adipoq,Zeb2,Ptbp3,Lyn,Rpa1,Ctsk,Cd2ap,Wnt10b…
MYELOID CELL DIFFERENTIATION (GO: BP)	0.00151845	0.0435968	0.45506	0.295272	1.36225	450	Hba-a2,Alas2,Hba-a1,Slc4a1,Hbb-bs,Irf4,Lef1,Smarca4,Bpgm,Slc1a5,Ypel4,Trim10,Zfp36l1,Prxl2a,Fech,Dmtn,Eif2ak1,Foxp1,Spib,Isg15,Rhag,Inpp5d,Sox6,Tmem64,Mef2c,Tcf3,Gpr183,Rptor,Wasf2,Epb42,Adipoq,Cib1,Mturn,Ptbp3,Lyn,Tgfbr3,Kmt2e,Ccl5,Epha2,Itpkb,Ncapg2,Gimap5,Zfp385a,Ubd,Tjp2,Snx10,Hmgb1,Acvr1b,Gpr55,Bap1,Mtor,Sirt1,Ufl1,Gmpr2,Apc,Creb1,Nfatc1,Casp3,Pik3r1,Srf,Slc11a2,Tpm4,Prkdc,Nedd9,Tgfb1,Socs1,…
CELL CYCLE (GO: BP)	1.79226e-05	0.00166377	0.57561	0.263857	1.32517	1617	Bcl7a,Lef1,Smarca4,Tfdp2,Bcl2l1,Jund,Cdc25b,Usp3,Zfp36l1,Eps8,Pim1,Cxcr5,Msh5,Bcr,Ezh2,Camk2d,Hes1,Btg2,Btg1,Plaat3,Arhgef10,Epb41,Abl1,Hmg20b,Bin1,Tcf3,Sde2,Foxo4,Bmal1,Mnt,Sh3glb1,Rrs1,Rptor,Cep250,Ttbk1,Banp,Gjc2,Ube2b,Snx9,Madd,Usp19,Lfng,Spo11,Nabp1,Clock,Ctdsp2,Camk2b,E2f2,Ppp1r13b,Apbb1,Mtbp,Rrm2b,Phip,Stag3,Susd2,Nipbl,Mbtps1,Bex4,Ccng2,Esr1,Tom1l1,Smarcc2,Smarcd1,Cdkn2c,Npat,Dtx3l,Rbm38,…
NEGATIVE REGULATION OF GENE EXPRESSION (GO: BP)	0.000332433	0.0143095	0.498493	0.269332	1.32307	1059	Vpreb3,Lef1,Smarca4,Hdac7,Tcf4,Tent5c,Pik3cd,Zfp36l1,Hdac5,Sigirr,Pnrc1,Slfn14,Ppp1r15a,Eif2ak1,Foxp1,Siglecg,Ezh2,Id3,H2az2,Cnot10,Gpr18,Cd22,Baz2a,Hes1,Parp1,Inpp5d,Btg2,Apobec1,Mef2c,Cnot6l,Acp5,Prkch,Ttbk1,Kmt2a,Phf19,Endou,Macroh2a2,H1f0,Traf3ip2,Grb7,Tgif1,Tia1,Igf2bp3,Resf1,Cd36,Trp53inp1,Rel,H2ac8,Trim30a,Phf2,H3f3a,Esr1,Unk,Shfl,Kdm4a,Pdcd4,Tut4,Rbm38,Pcx,Otud5,Mettl14,Tnfaip3,Nfkb1,Adip…
REGULATION OF RESPONSE TO STRESS (GO: BP)	0.00026907	0.0121952	0.498493	0.260632	1.30112	1295	Crhbp,Bcl7a,Foxo1,Hbb-bs,Irf4,Slamf6,Tifa,Smarca4,Sox4,Rag1,Bcl2l1,Xrcc6,Tbxa2r,Bst1,Gbp7,Ifi203,Uaca,Snca,Il10ra,Cd37,Gch1,Rsad2,Pim1,Mndal,Gypa,Fech,Mmrn1,Dmtn,Ppp1r15a,Wdfy1,Gbp3,Eif2ak1,Gramd4,Foxp1,Siglecg,Unc93b1,Bcr,Isg15,Otub2,Syvn1,Dpp4,Nlrc5,Fabp4,Parp1,Serinc3,Abl1,Mef2c,Gprc5b,Acp5,Shld2,Ttbk1,Aim2,Ficd,Il16,Traf3,Pspc1,Socs3,Kmt5b,Usp19,Apobec3,Pik3ap1,Zcchc3,Clock,Traf3ip2,Apbb1,Rft…
POSITIVE REGULATION OF TRANSCRIPTION BY RNA POLYMERASE II (GO: BP)	0.00088397	0.0298728	0.477271	0.263564	1.29976	1092	Ebf1,Ablim1,Foxo1,Wwox,Pax5,Irf4,Pou2af1,Lef1,Smarca4,Sox4,Tcf4,Tfdp2,Jund,Xrcc6,Hdac5,Hivep2,Csrnp1,Elk4,Foxp1,Spib,Lpin2,Itgb1bp1,Nlrc5,Supt4a,Irf5,Hes1,Parp1,Bcl9,Sox6,Tcf7l2,Mef2c,Tcf3,Foxo4,Bmal1,Prkd2,Bcas3,Arid5a,Rxrb,S100a10,Kmt2a,Myo1c,Bcl9l,Hes5,Mef2d,Clock,E2f2,Tcf12,Apbb1,Phip,Cbx7,Map3k1,Thap3,Nipbl,Rel,Elf1,Crebrf,Esr1,Pbx3,Etv5,Mlxip,Tbx6,Npat,E2f7,Paxip1,Nfkb1,Eaf2,Egln1,Slc30a9,Z…
CELL CYCLE PROCESS (GO: BP)	0.000882081	0.0298728	0.477271	0.25965	1.28715	1167	Bcl7a,Lef1,Smarca4,Bcl2l1,Cdc25b,Zfp36l1,Eps8,Cxcr5,Msh5,Ezh2,Camk2d,Arhgef10,Bin1,Tcf3,Sde2,Foxo4,Sh3glb1,Rrs1,Rptor,Cep250,Gjc2,Ube2b,Snx9,Usp19,Spo11,Nabp1,Clock,Ctdsp2,Camk2b,Apbb1,Mtbp,Rrm2b,Phip,Stag3,Susd2,Nipbl,Mbtps1,Bex4,Ccng2,Esr1,Tom1l1,Smarcc2,Smarcd1,Cdkn2c,Npat,Dtx3l,Rbm38,E2f7,Trim39,Paxip1,Chd3,Dlgap5,Crlf3,Pum1,Llgl1,Lyn,Stard9,Catsperz,Syce2,Sfpq,Wnt10b,Atp2b4,Stag1,Cep76,Mbd4,…
BIOLOGICAL PROCESS INVOLVED IN INTERSPECIES INTERACTION BETWEEN ORGANISMS (GO: BP)	0.000958816	0.0318434	0.477271	0.250812	1.25743	1394	Hba-a2,Cd79b,Hba-a1,Serpina3f,Irf4,Pou2af1,Lef1,Slamf7,Slamf6,Tifa,Smarca4,Bpgm,Wdfy4,Bcl2l1,Xrcc6,Gpam,Tbxa2r,Pik3cd,Trim10,Gbp7,Il7r,Evl,Ifi203,Rag2,Snca,Cd37,Gch1,Ppm1e,Rsad2,Pim1,Mndal,Ddit4,N4bp3,Pde4b,Wdfy1,Gbp3,Gramd4,Foxp1,Siglecg,Unc93b1,Bcr,Rnase12,Isg15,Ube2l6,Trim26,Dpp4,Ighm,Nlrc5,Map3k5,H2-Eb1,Irf5,Cxcl10,Fabp4,Parp1,Plaat3,Ivns1abp,Klhl6,Apobec1,Serinc3,Abl1,Bnip3l,Mef2c,Bin1,Tcf3,…
NITROGEN COMPOUND TRANSPORT (GO: BP)	0.000351398	0.0147952	0.498493	-0.245619	-1.24128	1755	Sytl1,Oxct1,Agap1,Tango6,S100a8,Eps15,Lgals3,Tmed3,Rab44,Cd63,Fcer1g,Clu,Cavin1,Flna,S100a9,Actb,Rab3d,Flot1,Arrb2,Prickle1,Tst,Rab34,Rab20,Comp,Ifi27,Actn4,Slc7a11,Chmp2a,Mcu,Il1b,Anxa1,Igf2bp2,Stxbp2,Cfl1,Myh10,Vamp4,Sorl1,P2rx1,Copz2,Tgfb3,Snx3,Mmp12,Slc35c2,Acsl4,Pdpn,Azin2,Krt18,Hcar2,Rab27a,Cpe,Tgfb2,Cav1,Clip3,Nucb2,Abcc5,Hspb1,Exoc1,Bcap31,Tfr2,Ptpn14,Gabarap,Ube2g2,C1qtnf12,Dtnbp1,Os9,Mg…
REGULATION OF CELL POPULATION PROLIFERATION (GO: BP)	0.000537445	0.0206032	0.477271	-0.250652	-1.25653	1520	Ncam1,Cited2,Ltf,Mmp9,Inhba,Eps15,Lgals3,Cyba,Tnfsf13b,S100a11,Erdr1x,Timp2,Rbpj,Clu,Camp,Flna,Rac2,Il11ra1,Bcl7c,Zmpste24,Ifitm3,Actb,Elane,Ltbp3,Thbs1,Cnn2,Trnp1,Cd9,Arrb2,Ccdc88b,Ccn4,Lrrc32,Efemp1,Lama5,Comp,Gnai2,Zfp609,Rogdi,Slc7a11,Htra1,Selenon,Tyrobp,Snhg15,Ccn1,Zfp703,Insr,Vsir,Csf2ra,Il1b,Anxa1,Igfbp3,Ccn2,Timp3,Tpm1,Mapk3,Ctsh,Cnmd,Dach1,Timp1,Tgfb3,Prrx2,Sfrp2,Cd248,Slurp1,Lrg1,Anxa2…
CYTOSKELETON ORGANIZATION (GO: BP)	0.000486139	0.0191885	0.498493	-0.254399	-1.26492	1319	Zmym3,Capg,Actn1,Enah,Rhoc,Tuba4a,Rnd3,Flna,Rac2,Zyx,S100a9,Thy1,Tmsb4x,Actb,Cnn2,Fgr,Prickle1,Ccdc88b,Palm,Actn4,Chmp2a,Tyrobp,Snhg15,Phldb2,Esam,Anxa1,Cfl1,Myh10,Sh3bgrl3,Ccn2,BC034090,Tpm1,Mapk3,Pfn1,Cdc42bpb,Tgfb3,Samd14,Arpc1b,Inpp5j,Map6,Pdgfa,Flnb,Vasp,Fam83h,Synpo,Parva,Gpr65,Krt18,Arpc2,Coro1a,Rhou,Tgfb2,Lsp1,Cav1,Odad3,Clip3,Sun2,Myl9,Wasf3,Fermt2,Capn1,Palld,Vim,Gabarap,Tln1,Dtnbp1,Pdl…
LIPID METABOLIC PROCESS (GO: BP)	0.00106384	0.0344408	0.45506	-0.257542	-1.2721	1142	Oxct1,Plbd1,Inhba,St3gal5,Faah,Tecr,Zmpste24,St6galnac6,Cyb5r3,Serinc2,Plpp1,Ccn1,Il1b,Anxa1,Lpl,Elovl1,Sorl1,P2rx1,Asah1,Pgap6,Inpp5j,Decr1,Pdgfa,Sirt2,Retsat,Ech1,Acsl4,Pdpn,Igf1r,Mogat2,Hcar2,Degs1,Cav1,Nucb2,Dolk,St3gal3,Gcdh,Capn2,B4galt6,Sdr42e1,Alox5ap,Etfb,Sult1a1,Cyb5r1,Far2,Lipa,Il1rn,Nudt7,Agps,G6pdx,Lima1,Fads3,Slc27a4,Pik3cb,Plppr3,Pigyl,Apobr,Acly,Fuca1,Gfi1,Dgkg,Mboat7,Sftpb,St6gal…
ESTABLISHMENT OF PROTEIN LOCALIZATION (GO: BP)	0.000139774	0.007861	0.518848	-0.253916	-1.27596	1597	Sytl1,Oxct1,Agap1,Tango6,Eps15,Tmed3,Cd63,Clu,Cavin1,Flna,Rab3d,Arrb2,Prickle1,Rab34,Rab20,Comp,Ifi27,Actn4,Slc7a11,Chmp2a,Mcu,Phldb2,Il1b,Anxa1,Stxbp2,Cfl1,Myh10,Vamp4,Sorl1,Copz2,Tgfb3,Snx3,Mmp12,Acsl4,Lims1,Krt18,Arpc2,Hcar2,Rab27a,Tspan10,Tgfb2,Cemip,Emc6,Cav1,Clip3,Ncln,Hspb1,Exoc1,Bcap31,Tfr2,Ptpn14,Gabarap,Ube2g2,C1qtnf12,Dtnbp1,Os9,Bcs1l,Slc8b1,Romo1,Tfap2b,Itgb1,Il1rn,Rab2a,Caml,Sec22c,D…
CELL CELL SIGNALING (GO: BP)	0.000950453	0.0317023	0.477271	-0.259961	-1.27976	1044	Ncam1,Oxct1,Mmp9,Atf4,Inhba,S100a8,Lgals3,Ly6g,Faah,L1cam,Rab44,Fcer1g,Rgs10,Flna,S100a9,Thy1,Flot1,Arrb2,Dmpk,Ly6c2,Rap1b,Gnai2,Slc7a11,Tyrobp,Mcu,Il1b,Anxa1,Stxbp2,Cfl1,Igfbp3,Mapk3,Pfn1,P2rx1,Pdgfa,Acsl4,Igf1r,Synpo,Gucy1a1,Septin5,Pirb,Hcar2,Cpe,Adra1b,Nrgn,Nucb2,Tfr2,C1qtnf12,Dtnbp1,Ptn,Xlr4b,Slc8b1,Tfap2b,Itgb1,Il1rn,Prnp,Nedd4,Ica1,Camk2n1,Anxa5,Osm,Ccl2,Tm2d3,Slc1a3,Gpr68,Cdh11,Clstn1,Nfa…
CENTRAL NERVOUS SYSTEM DEVELOPMENT (GO: BP)	0.00164087	0.0464811	0.45506	-0.264623	-1.28467	830	Ncam1,Cited2,Inhba,S100a8,Capg,Rbpj,Clu,Flna,S100a9,Pbx2,Fut10,Trnp1,Glis2,Sema3f,Rogdi,Slc7a11,Tyrobp,Tpp1,Il1b,Myh10,Lamb2,Mapk3,Pitx1,Sfrp2,Sirt2,Reck,Gas1,Igf1r,Mxra8,Kdm6b,Odad3,Rbfox2,Sun2,Wasf3,Ephb3,Vim,Ndn,Ptn,Ndnf,B4galt6,Itgb1,Dlg5,Dctn1,Mag,Rere,Slit2,Hapln1,Cdh11,Loxl3,Mboat7,Ski,Vldlr,Eif2b3,Atf5,Dlc1,Bmp4,Gnpat,Col4a1,Lhx1,Atg7,Crtac1,Atp6ap2,App,Actr3,Mfsd8,Slc2a1,Sfrp1,Ecrg4,Nrp2…
GENERATION OF NEURONS (GO: BP)	0.000160193	0.00869217	0.518848	-0.259899	-1.29893	1433	Ncam1,Cux1,Inhba,L1cam,Unc5a,Enah,Timp2,Rbpj,Clu,Flna,S100a9,Pbx2,Thy1,Actb,Flot1,Spr,Rap1gap2,Prickle1,Palm,Sema3f,Efemp1,Lama5,Ier2,Zfp609,Postn,Rom1,Il1b,Alcam,Cfl1,Myh10,Lamb2,Snx3,Sfrp2,Samd14,Inpp5j,Map6,Rspo2,Cspg4,Vasp,Acsl4,Gas1,Igf1r,Tgfb2,Tet1,Cav1,Matn2,Slit3,Hspb1,Rbfox2,Arhgef25,Ephb3,Vim,Ndn,Dtnbp1,Cd44,Ptn,Ndnf,Serpinf1,Scarf1,B4galt6,Xlr4b,Rnd1,Fbxw8,Itgb1,Dlg5,Atp9a,Ptprg,Gdi1,K…
NEUROGENESIS (GO: BP)	9.23617e-05	0.00635399	0.538434	-0.258487	-1.30472	1667	Ncam1,Cux1,Inhba,S100a8,L1cam,Unc5a,Enah,Timp2,Rbpj,Clu,Flna,S100a9,Pbx2,Thy1,Actb,Cd9,Flot1,Arrb2,Spr,Rap1gap2,Prickle1,Palm,Sema3f,Efemp1,Lama5,Ier2,Zfp609,Rogdi,Postn,Rom1,Il1b,Alcam,Cfl1,Myh10,Lamb2,Col6a1,Mapk3,Sorl1,Snx3,Sfrp2,Samd14,Inpp5j,Anxa2,Map6,Rspo2,Cspg4,Sirt2,Vasp,Acsl4,Gas1,Igf1r,Mxra8,Tgfb2,Tet1,Cav1,Matn2,Slit3,Hspb1,Rbfox2,Arhgef25,Sun2,Wasf3,Ephb3,Vim,Ndn,Dtnbp1,Cd44,Ptn,Ndnf…
PROTEIN TRANSPORT (GO: BP)	0.000127035	0.00735942	0.518848	-0.261654	-1.30652	1354	Sytl1,Oxct1,Agap1,Tango6,Eps15,Tmed3,Cd63,Clu,Cavin1,Flna,Rab3d,Arrb2,Prickle1,Rab34,Rab20,Comp,Ifi27,Actn4,Slc7a11,Chmp2a,Mcu,Il1b,Anxa1,Stxbp2,Cfl1,Myh10,Vamp4,Sorl1,Copz2,Tgfb3,Snx3,Mmp12,Acsl4,Krt18,Hcar2,Rab27a,Tgfb2,Cav1,Clip3,Hspb1,Exoc1,Bcap31,Tfr2,Ptpn14,Gabarap,Ube2g2,C1qtnf12,Dtnbp1,Os9,Slc8b1,Romo1,Tfap2b,Itgb1,Il1rn,Rab2a,Sec22c,Dnajc27,Gdi1,Vps37b,Nedd4,Camk2n1,Anxa5,Yif1b,Erlec1,Ra…
POSITIVE REGULATION OF CELLULAR COMPONENT ORGANIZATION (GO: BP)	0.000279953	0.0125409	0.498493	-0.267327	-1.32185	1157	Cux1,Adgrl1,Mmp9,Adgrl2,Lcn2,Lgals3,Cyba,L1cam,Cd63,Fcer1g,Clu,Rhoc,Flna,Rac2,S100a9,Thy1,Flot1,Arrb2,Col16a1,Palm,Efemp1,Cd300lf,Ralb,Actn4,Tyrobp,Mcu,Phldb2,Insr,Il1b,Anxa1,Cfl1,Ccn2,Tpm1,Mapk3,Pfn1,Tgfb3,Snx3,Plaur,Anxa2,Pnkp,Map6,Sirt2,Vasp,Pdpn,Igf1r,Synpo,Gpr65,Lims1,Arpc2,Rab27a,Tgfb2,Cav1,Clip3,Hspb1,Wasf3,Fermt2,Ephb3,Ercc1,Tfr2,Dtnbp1,Eif5a,Ptn,Ndnf,Capn2,Serpinf1,Scarf1,Ahnak,Xlr4b,Tir…
REGULATION OF MULTICELLULAR ORGANISMAL DEVELOPMENT (GO: BP)	2.40501e-05	0.0020142	0.57561	-0.266502	-1.32884	1386	Ncam1,Cux1,Adgrl1,Cited2,Ngp,Mmp9,Adgrl2,Atf4,Chi3l1,Inhba,Pglyrp1,Lgals3,Sgms1os1,L1cam,Cybb,Rbpj,Camp,Zmpste24,Thy1,Actb,Ltbp3,Thbs1,Hoxa7,Arrb2,Fos,Ccn4,Sema3f,Itgb2l,Efemp1,Lama5,Comp,Zfp609,Adam8,Nfam1,Tyrobp,Ccn1,Phldb2,Insr,Vsir,Il1b,Anxa1,Cfl1,Itgb2,Ccn2,Pkm,Ctsh,Cnmd,Sorl1,Sfrp2,Lrg1,Anxa2,Map6,Sirt2,Reck,Lilrb4b,Angptl7,Anxa3,Pirb,Tgfb2,Cav1,Sulf1,Col14a1,Cela1,Hoxa9,Hspb1,Rbfox2,Fgf18,…
REGULATION OF TRANSPORT (GO: BP)	2.12595e-05	0.00189218	0.57561	-0.265341	-1.33123	1536	Oxct1,Dnajc6,Mmp9,Atf4,Inhba,Lcn2,S100a8,Lgals3,Cyba,Cd177,Cd63,Fcer1g,Clu,Flna,Rac2,S100a9,Thy1,Actb,Thbs1,Cnn2,Rab3d,Prtn3,Flot1,Gnb2,Arrb2,Fgr,Dmpk,Siglece,Rab34,Itgb2l,Rap1b,Ifi27,Cd300lf,Gnai2,Actn4,Slc7a11,Chmp2a,Selenon,Mcu,Insr,Il1b,Anxa1,Jph2,Stxbp2,Igfbp3,Myh10,Ak1,Itgb2,Vamp4,Mapk3,Sorl1,P2rx1,Tgfb3,Snx3,Kcnab2,Anxa2,Sirt2,Acsl4,Gas1,Septin5,Azin2,Coro1a,Hcar2,Rab27a,Tgfb2,Cemip,Ms4a2,…
POSITIVE REGULATION OF MULTICELLULAR ORGANISMAL PROCESS (GO: BP)	1.12446e-05	0.00117081	0.593325	-0.264449	-1.33203	1612	Ncam1,Cux1,Adgrl1,Cited2,Chil3,Mmp9,Adgrl2,Atf4,Chi3l1,Inhba,Lcn2,Lgals3,Cyba,Spon2,Tnfsf13b,Sgms1os1,Faah,Mmp8,L1cam,Fcer1g,Cybb,Rbpj,Clu,Flot2,Camp,Flna,Bcl7c,S100a9,Thy1,Actb,Elane,Ltbp3,Thbs1,Flot1,Arrb2,Fgr,Fos,Ccdc88b,Ccn4,Itgb2l,Zfp609,Adam8,Nfam1,Tyrobp,Ccn1,Postn,Zfp703,Gpsm3,Vsir,Il1b,Anxa1,Cfl1,Itgb2,Ccn2,Lpl,Pkm,Tpm1,Ctsh,Cnmd,Sorl1,Tgfb3,Sfrp2,Lrg1,Anxa2,Mfap2,Mmp12,Decr1,Map6,Pdpn,I…
REGULATION OF CELLULAR COMPONENT BIOGENESIS (GO: BP)	0.00014324	0.00799759	0.518848	-0.272517	-1.33226	994	Ncam1,Adgrl1,Dnajc6,Adgrl2,Lgals3,Capg,L1cam,Clu,Rhoc,Flna,Rac2,Thy1,Tmsb4x,Flot1,Col16a1,Eif4ebp1,Prickle1,Palm,Ralb,Chmp2a,Ccn1,Phldb2,Esam,Il1b,Cfl1,Ccn2,Tpm1,Pfn1,Sorl1,Tgfb3,Inpp5j,Sirt2,Vasp,Synpo,Gpr65,Lims1,Arpc2,Coro1a,Cav1,Odad3,Clip3,Ncln,Fermt2,Ephb3,Capn1,Ercc1,H3f3b,Cryab,Rhog,Xlr4b,Tirap,Trabd2b,Dlg5,Rps3,Bin3,Sptan1,Vill,Zdhhc8,Gda,Dctn1,Ica1,Cldn1,Slit2,Hck,Nptxr,Asap3,Fes,Snx18,…
ENZYME LINKED RECEPTOR PROTEIN SIGNALING PATHWAY (GO: BP)	0.000189627	0.009676	0.518848	-0.274049	-1.33315	865	Cited2,Mmp9,Inhba,Cd63,Rbpj,Tspan9,Zyx,Ltbp3,Thbs1,Arrb2,Fgr,Eif4ebp1,Prickle1,Fos,Lrrc32,Efemp1,Comp,Gnai2,Ralb,Htra1,Selenon,Ccn1,Zfp703,Insr,Vsir,Il1b,Igfbp3,Ccn2,Col6a1,Mapk3,Cnmd,Sorl1,Tgfb3,Ptpre,Sfrp2,Plaur,Lrg1,Pdgfa,Cspg4,Igf1r,Dok2,Tgfb2,Tet1,Cav1,Sulf1,Nucb2,Hspb1,Frk,Fgf18,Fermt2,Ephb3,Gprc5a,Spi1,Ercc1,C1qtnf12,Ndn,Fstl1,Clnk,Hbegf,Tfap2b,Itgb1,Creb3l1,Smoc2,Caml,Col4a2,Igfbp2,Xdh,Me…
DEVELOPMENTAL GROWTH (GO: BP)	0.000699428	0.0255407	0.477271	-0.278062	-1.33752	706	Ncam1,Cited2,L1cam,Rbpj,Zmpste24,Thbs1,Cd9,Spr,Prickle1,Ccn4,Sema3f,Comp,Selenon,Snhg15,Postn,Insr,Anxa1,Cfl1,Myh10,Lamb2,Col6a1,Pkm,Sfrp2,Rspo2,Gas1,Igf1r,Adra1b,Tgfb2,Odad3,Col14a1,Cela1,Slit3,Gamt,Evc,Ercc1,Ndn,Ptn,Lzts2,H3f3b,Hbegf,Meg3,Itgb1,Bin3,Gdi1,G6pdx,Megf8,Rnd2,Dio3,Mag,Scaper,Slit2,Csf1,H19,Hlx,Atf5,Gnas,Fn1,Tnn,Bmp4,Cd81,Ddr2,Ttl,Lhx1,Crabp2,App,Actr3,Sfrp1,Nrp2,Fto,Lrp1,Pin1,Ilk,Ac…
POSITIVE REGULATION OF DEVELOPMENTAL PROCESS (GO: BP)	2.77337e-05	0.00227327	0.57561	-0.269717	-1.34131	1308	Ncam1,Cux1,Adgrl1,Cited2,Ltf,Mmp9,Adgrl2,Atf4,Chi3l1,Inhba,Lcn2,Lgals3,Tnfsf13b,L1cam,Timp2,Cybb,Rbpj,Clu,Camp,Flna,Bcl7c,Tmsb4x,Actb,Ltbp3,Thbs1,Flot1,Arrb2,Fos,Ccn4,Palm,Itgb2l,Zfp609,Adam8,Tyrobp,Ccn1,Zfp703,Mcu,Phldb2,Insr,Vsir,Il1b,Anxa1,Cfl1,Igfbp3,Lamb2,Itgb2,Ccn2,Lpl,Pkm,Ctsh,Sorl1,Tgfb3,Sfrp2,Lrg1,Map6,Sirt2,Pdpn,Igf1r,Lilrb4b,Anxa3,Tgfb2,Tet1,Cela1,Hspb1,Fgf18,Fermt2,Xkr8,Ephb3,Vim,Spi1…
REGULATION OF CELL PROJECTION ORGANIZATION (GO: BP)	0.000798041	0.0280772	0.477271	-0.279473	-1.34355	705	Cux1,Lcn2,L1cam,Flna,Rac2,S100a9,Thy1,Rap1gap2,Palm,Sema3f,Efemp1,Cfl1,Pfn1,Tgfb3,Snx3,Sfrp2,Inpp5j,Map6,Cspg4,Pdpn,Igf1r,Arpc2,Cav1,Odad3,Hspb1,Ephb3,Vim,Dtnbp1,Cd44,Ptn,Ndnf,Serpinf1,Scarf1,Rhog,Xlr4b,Fbxw8,Itgb1,Bin3,Ptprg,Gdi1,Kidins220,Prnp,Megf8,Nedd4,Rnd2,Mag,Slit2,Fes,Gfi1,Dgkg,Nfatc4,Sdc2,Acsl6,Gpm6a,Vldlr,Capzb,Fnbp1l,Fn1,Tnn,Plxnc1,Cdc42,Nptn,Bmp4,Snapin,Ddr2,Crabp2,App,Actr3,Pak3,Sfrp…
CELL PROJECTION ORGANIZATION (GO: BP)	2.09858e-06	0.00030436	0.627257	-0.270653	-1.35701	1542	Ncam1,Cux1,Ccdc28b,Lcn2,Capg,L1cam,Unc5a,Enah,Clu,Flna,Rac2,S100a9,Thy1,Actb,Flot1,Rap1gap2,Prickle1,Rab34,Palm,Sema3f,Efemp1,Lama5,Postn,Insr,Alcam,Cfl1,Myh10,Lamb2,Tpm1,Pfn1,Dync2i1,Tgfb3,Snx3,Sfrp2,Samd14,Inpp5j,Map6,Pdgfa,Cspg4,Vasp,Acsl4,Pdpn,Gas1,Igf1r,Parva,Arpc2,Coro1a,Tgfb2,Tet1,Emp3,Cav1,Matn2,Odad3,Slit3,Hspb1,Rbfox2,Arhgef25,Wasf3,Ephb3,Vim,Ndn,Dtnbp1,Ccno,Cd44,Ptn,Ndnf,Serpinf1,Scarf…
RESPONSE TO GROWTH FACTOR (GO: BP)	0.000574643	0.0214265	0.477271	-0.286929	-1.36637	600	Pde8a,Cited2,Cd63,Rbpj,Zyx,Ltbp3,Thbs1,Arrb2,Fos,Lrrc32,Comp,Ier2,Htra1,Selenon,Ccn1,Zfp703,Insr,Vsir,Anxa1,Cfl1,Ccn2,Mapk3,Cnmd,Sorl1,Tgfb3,Sfrp2,Lrg1,Igf1r,Arpc2,Coro1a,Tgfb2,Tet1,Cav1,Sulf1,Hspb1,Fgf18,Fermt2,Spi1,Ndn,Cd44,Ndnf,Fstl1,Tfap2b,Itgb1,Rps3,Creb3l1,Smoc2,Col4a2,Kidins220,Xdh,Megf8,Nedd4,Rasl11b,Pik3cb,Ccl2,Tgfb1i1,Slit2,Ltbp1,Rack1,Ski,Folr1,Hgs,Nptn,Bmp4,Cpne3,Col1a2,Cald1,Actr3,Sp…
REGULATION OF NEURON PROJECTION DEVELOPMENT (GO: BP)	0.00126792	0.0380537	0.45506	-0.290952	-1.36817	516	Cux1,L1cam,Flna,S100a9,Thy1,Rap1gap2,Sema3f,Efemp1,Cfl1,Snx3,Sfrp2,Inpp5j,Map6,Cspg4,Igf1r,Hspb1,Ephb3,Vim,Dtnbp1,Ptn,Ndnf,Serpinf1,Scarf1,Xlr4b,Fbxw8,Itgb1,Ptprg,Gdi1,Kidins220,Megf8,Nedd4,Rnd2,Mag,Slit2,Fes,Gfi1,Dgkg,Nfatc4,Sdc2,Acsl6,Vldlr,Fn1,Tnn,Plxnc1,Nptn,Bmp4,Snapin,Ddr2,Crabp2,Actr3,Pak3,Sfrp1,Lrp1,Ilk,Creb3l2,Sema4f,Adnp,Tiam2,Prrx1,Cul7,Prkcsh,Dpysl3,Rpl4,Nrp1,Cpeb1,Cdh2,Dbnl,H2-D1,Pak…
ORGANONITROGEN COMPOUND BIOSYNTHETIC PROCESS (GO: BP)	2.44467e-06	0.000336361	0.627257	-0.274121	-1.37226	1487	Tk1,Inhba,St3gal5,Abtb1,Chst13,Aprt,S100a9,Fut10,Thbs1,Spr,Eif4ebp1,St6galnac6,Plod3,Slc7a11,Ccn1,Ddost,Insr,Pcbd1,Il1b,Igf2bp2,Ak1,Aldoa,Col6a1,Pkm,Mapk3,Elovl1,P2rx1,Asah1,Ckm,Rpl8,Gfpt1,Snx3,Mrpl19,Slc35c2,Rpsa,Acsl4,Gucy1a1,Rps2,Azin2,Degs1,Tgfb2,Tet1,Dad1,Magt1,Mettl8,Itm2b,Clip3,Fau,Gamt,Abcc5,Eif1,St3gal3,Chst12,Farsa,Atp5mc1,Eif5a,Rps15,Rpl12,Asns,Gcdh,Gatm,Capn2,Rps5,Rplp1,Gapdh,Pcbd2,B4…
ANATOMICAL STRUCTURE FORMATION INVOLVED IN MORPHOGENESIS (GO: BP)	2.34859e-05	0.00198856	0.57561	-0.278839	-1.37393	1109	Cited2,Ngp,Mmp9,Chi3l1,Inhba,Lgals3,Tnfsf13b,Actn1,Enah,Cybb,Rbpj,Rspo3,Camp,Adam15,Flna,Thy1,Thbs1,Cd9,Flot1,Itga2b,Prickle1,Itgb2l,Adam8,Rogdi,Tyrobp,Ccn1,Phldb2,Il1b,Anxa1,Cfl1,Myh10,Itgb2,Ccn2,Pkm,Tpm1,Mapk3,Ctsh,Pfn1,Cnmd,Tgfb3,Sfrp2,Col5a1,Lrg1,Anxa2,Mfap2,Pdgfa,Cspg4,Vasp,Pdpn,Reck,Parva,Anxa3,Clec1b,Gpi1,Tgfb2,Tet1,Cav1,Kdm6b,Sulf1,Cela1,Hspb1,Myl9,Fgf18,Ephb3,Ercc1,Ptpn14,Cd44,Ptn,Ndnf,C…
NEGATIVE REGULATION OF CELL POPULATION PROLIFERATION (GO: BP)	0.00029136	0.0128282	0.498493	-0.288415	-1.38247	660	Cited2,Mmp9,Inhba,Lgals3,Erdr1x,Timp2,Rbpj,Ifitm3,Thbs1,Cd9,Lrrc32,Tyrobp,Vsir,Il1b,Igfbp3,Timp3,Tpm1,Cnmd,Dach1,Tgfb3,Sfrp2,Slurp1,Sirt2,Pdpn,Gas1,Lilrb4b,Lims1,Tgfb2,Cav1,Sulf1,Slit3,Ptpn14,Cd44,Ptn,Serpinf1,Lzts2,Ndrg2,Tfap2b,Itgb1,Dlg5,Prnp,Xdh,Pth1r,Slit2,Ogn,H19,Efemp2,Ski,Fth1,Zbtb7b,Atf5,Tnn,Dlc1,Gtpbp4,Bmp4,Cyp1b1,Spint2,Ccn5,App,Sparc,Sfrp1,Ecrg4,Gsdme,Nupr1,Tent5b,Ilk,Grem1,Cdh13,Fbxo4…
MEMBRANE ORGANIZATION (GO: BP)	0.000275031	0.0123925	0.498493	-0.287776	-1.38349	700	Fcer1g,Clu,Zmpste24,S100a9,Thbs1,Trappc2l,Cd9,Flot1,Dmpk,Siglece,Rab34,Rab20,Adam8,Slc7a11,Chmp2a,Anxa1,Myh10,Itgb2,Col6a1,Vamp4,Tmcc1,Snx3,Col5a1,Anxa2,Azin2,Coro1a,Degs1,Tgfb2,Emc6,Cav1,Ncln,Sun2,Exoc1,Cavin2,Xkr8,Bcs1l,Ptn,Pacsin3,Ahnak,Romo1,Itgb1,Bin3,Atp9a,Caml,Dctn1,Plekha8,Ndufa13,Snx18,Vdac2,Ier3,Get1,Tmeff2,Fnbp1l,Vamp8,Stx8,Folr1,Rab5if,Hgs,Cdc42,Ap2m1,Snapin,Colec12,Gnpat,Myadm,Abcd2,…
LOCALIZATION WITHIN MEMBRANE (GO: BP)	0.00024996	0.0116724	0.498493	-0.292037	-1.3997	671	Eps15,Lgals3,Fcer1g,Tspan9,Flot2,Flna,Thy1,Actb,Flot1,Rab34,Palm,Itgb2l,Lama5,Slc7a11,Itgb2,Vamp4,Sorl1,Snx3,Anxa2,Krt18,Arpc2,Cpe,Cemip,Emc6,Tmbim1,Clip3,Ncln,Exoc1,Fermt2,Gabarap,Bcs1l,Ptn,Rhog,Romo1,Itgb1,Atp9a,Caml,Gdi1,Vps37b,Prnp,Yif1b,Rab13,Ccl2,Nptxr,Ndufa13,Clstn1,Pik3r2,Get1,Rack1,Vamp8,Stx8,Folr1,Pgrmc1,Rab5if,Tmem59,Hgs,Ap2m1,Nherf2,Cd81,Tnfrsf1a,Myadm,Zdhhc3,Atp6ap1,Lhfpl4,Actr3,Farp…
AMEBOIDAL TYPE CELL MIGRATION (GO: BP)	0.000751356	0.0268018	0.477271	-0.305917	-1.41172	423	Mmp9,Lcn2,Cd63,Arhgdib,S100a9,Thbs1,Sema3f,Itgb2l,Lama5,Adam8,Actn4,Anxa1,Cfl1,Itgb2,Ctsh,Pfn1,Timp1,Cd248,Lrg1,Mmp12,Anxa3,Gpi1,Coro1a,Tgfb2,Hspb1,Fgf18,Lamtor2,Pdlim1,Serpinf1,Fstl1,Hbegf,Itgb1,Smoc2,Ptprg,Megf8,Pik3cb,Rab13,Slit2,Meox2,Pik3r2,Csnk2b,Tns1,Rras,Folr1,Fn1,Sema3c,Acta2,Ccr6,Cdc42,Bmp4,Cyp1b1,Snai1,Ddr2,Actr3,Pak3,Sparc,Nrp2,Nckap1,Cln3,Itga11,Ilk,Grem1,Cdh13,Loxl2,Sema4f,Hdac6,Bsg…
HEART DEVELOPMENT (GO: BP)	0.000158932	0.00868489	0.518848	-0.296698	-1.41227	596	Ncam1,Cited2,Mmp9,Inhba,Rbpj,Adam15,Flna,Zmpste24,Thbs1,Arrb2,Prickle1,Ccn4,Ccn1,Insr,Jph2,Myh10,Col6a1,Tpm1,Mapk3,Tgfb3,Sfrp2,Col5a1,Pdpn,Gaa,Parva,Gys1,Cpe,Adra1b,Tgfb2,Kdm6b,Odad3,Col14a1,Slit3,Pdlim1,Itgb1,G6pdx,Megf8,Nedd4,Fhl2,Slit2,Nfatc4,Ltbp1,Pdlim7,Mmp2,Folr1,Fn1,Sema3c,Dlc1,Cdc42,Bmp4,Snai1,Tnfrsf1a,Atg7,Pdlim4,Adam19,Nrp2,Nckap1,Lrp1,Pin1,Id2,Ilk,Grem1,Speg,Adamts6,Snx17,Col3a1,Pkd2,T…
CARBOHYDRATE METABOLIC PROCESS (GO: BP)	0.000691268	0.025363	0.477271	-0.301719	-1.41401	492	Chil3,Atf4,Chi3l1,Foxk1,Zmpste24,Fut10,Pfkfb4,Adpgk,St6galnac6,Selenon,Insr,Pgd,Igfbp3,Aldoa,Col6a1,Pkm,Gfpt1,Ldha,Gyg1,Gaa,Gpi1,Gys1,Mogat2,Adra1b,Pgm1,Phkb,Chst12,C1qtnf12,Gale,Gapdh,B4galt6,Gnptg,Mgat2,Tfap2b,Lipa,Rpia,G6pdx,Eno3,Pth1r,Chit1,Fuca1,St6galnac4,Ier3,Sirt7,Eno1,Akr1a1,Mlx,Lcmt1,Mlst8,Ydjc,Hexa,Pofut2,Shpk,Dgat2,App,Nupr1,P2ry6,Hexb,Actn3,Arl2,Oas1c,Grb10,Man1b1,Chst7,Tnf,Slc25a11,…
ENDOMEMBRANE SYSTEM ORGANIZATION (GO: BP)	0.00046865	0.0186131	0.498493	-0.301309	-1.41689	518	Tmed3,Clu,Zmpste24,S100a9,Cd9,Flot1,Dmpk,Rnf26,Chmp2a,Myh10,Col6a1,Vamp4,Mapk3,Tmcc1,Snx3,Col5a1,Anxa2,Rab27a,Degs1,Tgfb2,Emc6,Cav1,Ncln,Sun2,Cavin2,Xkr8,Dtnbp1,Pacsin3,Ahnak,Fbxw8,Rab2a,Bin3,Caml,Dctn1,Rbsn,Snx18,Plekhj1,Get1,Anxa8,Tmeff2,Fnbp1l,Folr1,Rab5if,Cdc42,Snapin,Colec12,Abcd2,Dnm1,Use1,Aktip,Fhip1b,Ap3s1,Cln3,Plekhf1,Reep5,Atp8b4,Rab38,Laptm4b,Sec31a,Tmem147,Nbeal2,Cul7,Otof,Ptprn,Arl8b…
ACTIN FILAMENT BASED PROCESS (GO: BP)	0.000102589	0.00674795	0.538434	-0.293563	-1.41832	744	Capg,Actn1,Enah,Rhoc,Rnd3,Flna,Rac2,Zyx,S100a9,Tmsb4x,Actb,Cnn2,Myl6,Fgr,Actn4,Tyrobp,Phldb2,Esam,Anxa1,Cfl1,Myh10,Ccn2,Tpm1,Pfn1,Cdc42bpb,Tgfb3,Samd14,Arpc1b,Pdgfa,Flnb,Vasp,Pdpn,Synpo,Parva,Gpr65,Arpc2,Coro1a,Rhou,Tgfb2,Cav1,Sun2,Myl9,Wasf3,Fermt2,Capn1,Palld,Tln1,Dtnbp1,Pdlim1,Rhog,Rnd1,Itgb1,Tpm2,Sptan1,Vill,Msrb1,Cavin3,Lima1,Fmnl3,Rflnb,Rnd2,Myo1f,Rab13,Slit2,Hck,Msrb2,Asap3,Lurap1,Tagln2,P…
CELL CELL ADHESION (GO: BP)	7.64643e-05	0.00552046	0.538434	-0.29342	-1.41868	771	Ncam1,Adgrl1,Tjp3,Cited2,S100a8,Lgals3,Tnfsf13b,Cd177,L1cam,Tspan9,Flot2,Rac2,S100a9,Thy1,Actb,Elane,Thbs1,Cd9,Flot1,Itga2b,Prickle1,Ccdc88b,Itgb2l,Lrrc32,Comp,Zfp609,Adam8,Slc7a11,Ccn1,Zfp703,Vsir,Esam,Il1b,Anxa1,Alcam,Itgb2,Ctsg,Plaur,Lrg1,Rpsa,Pdpn,Lilrb4b,Parva,Lims1,Coro1a,Tgfb2,Cav1,Hspb1,Ephb3,Capn1,Palld,Spi1,Tln1,Cd44,Scarf1,Itgb1,Dlg5,Rps3,Il1rn,Tmem47,Epcam,Igfbp2,Prnp,Mag,Cldn1,Pik3cb…
MONOCARBOXYLIC ACID METABOLIC PROCESS (GO: BP)	0.00038116	0.0157894	0.498493	-0.301598	-1.42832	538	Foxk1,Faah,Tecr,Adpgk,Insr,Pgd,Il1b,Anxa1,Aldoa,Col6a1,Lpl,Pkm,Elovl1,Asah1,Ldha,Decr1,Sirt2,Ech1,Acsl4,Pdpn,Gpi1,Degs1,Cav1,Nucb2,Gamt,Chst12,Gcdh,Gatm,Gale,Gapdh,Alox5ap,Etfb,Lipa,Nudt7,Eno3,Fads3,Slc27a4,Acly,Slc1a3,Ier3,Acsl6,Apoc1,Eno1,Mecr,Ephx1,Aoah,Acot7,Acadvl,Akr1a1,Mlx,Mlst8,Cyp1b1,Gnpat,Tnfrsf1a,Abcd2,Hexa,Hyi,Crabp2,Abhd5,Dgat2,App,Hlcs,Nupr1,Scp2,Insig2,Hexb,Actn3,Acox1,Arl2,Ptgr2,H…
SMALL MOLECULE METABOLIC PROCESS (GO: BP)	9.41563e-08	2.59098e-05	0.704976	-0.285511	-1.42992	1480	Tk1,Oxct1,Atf4,Inhba,Foxk1,Car1,Faah,Aprt,Prdx5,Tecr,Tkt,Zmpste24,Lta4h,Pfkfb4,Adpgk,Spr,Cyb5r3,Uap1l1,Plod3,Slc7a11,Selenon,Plpp1,Insr,Pcbd1,Pgd,Il1b,Anxa1,Igfbp3,Ak1,Aldoa,Col6a1,Lpl,Pkm,Elovl1,Asah1,Gfpt1,Kcnab2,Ldha,Decr1,Sirt2,Retsat,Ech1,Acsl4,Pdpn,Gucy1a1,Gpi1,Azin2,Mogat2,Adra1b,Degs1,Pgm1,Cav1,Nucb2,Gamt,Chst12,C1qtnf12,Atp5mc1,Asns,Gcdh,Gatm,Gale,Gapdh,Pcbd2,Alox5ap,Etfb,Tfap2b,Far2,Lip…
NEGATIVE REGULATION OF LOCOMOTION (GO: BP)	0.00169545	0.0473314	0.45506	-0.317506	-1.43042	313	Cited2,Cd63,Erdr1x,Arhgdib,Adam15,Thy1,Thbs1,Cnn2,Hoxa7,Sema3f,Phldb2,Cfl1,Igfbp3,Tpm1,Dach1,Timp1,Sfrp2,Slurp1,Reck,Tet1,Cav1,Sulf1,Ptn,Serpinf1,Dlg5,Il1rn,Ptprg,Slit2,Cdh11,Meox2,Pik3r2,Csnk2b,Tmeff2,Rras,Tnn,Dlc1,Gtpbp4,Cyp1b1,Spint2,Sfrp1,Lrp1,Tcaf1,Pin1,Ilk,Grem1,Dusp3,Col3a1,Rac1,Tafa5,Tnf,Dpysl3,Nrp1,Bcl2,Serpine1,Emilin1,Tbx5,Ndrg4,Arhgap4,Svbp,Ptprj,Card10,Nfe2l2,Nrg1,Ccn3,Nisch,Cldn19,R…
NEURON DEVELOPMENT (GO: BP)	1.2906e-06	0.000207168	0.643552	-0.291223	-1.43808	1148	Ncam1,Cux1,L1cam,Unc5a,Enah,Clu,Flna,S100a9,Pbx2,Thy1,Actb,Flot1,Spr,Rap1gap2,Prickle1,Palm,Sema3f,Efemp1,Lama5,Postn,Rom1,Alcam,Cfl1,Myh10,Lamb2,Snx3,Sfrp2,Samd14,Inpp5j,Map6,Cspg4,Vasp,Acsl4,Gas1,Igf1r,Tgfb2,Tet1,Matn2,Slit3,Hspb1,Rbfox2,Arhgef25,Ephb3,Vim,Ndn,Dtnbp1,Cd44,Ptn,Ndnf,Serpinf1,Scarf1,B4galt6,Xlr4b,Rnd1,Fbxw8,Itgb1,Dlg5,Atp9a,Ptprg,Gdi1,Kidins220,Megf8,Nedd4,Rnd2,Dio3,Mag,Rab13,Rere…
CELL MORPHOGENESIS (GO: BP)	4.67748e-06	0.00058129	0.610527	-0.295168	-1.44252	947	Ncam1,Cux1,Zmym3,Atf4,L1cam,Unc5a,Actn1,Enah,Clu,Flna,Zmpste24,Thy1,Actb,Flot1,Spr,Fgr,Prickle1,Palm,Sema3f,Lama5,Plod3,Adam8,Postn,Anxa1,Alcam,Cfl1,Myh10,Lamb2,Aldoa,Col6a1,Tpm1,Cnmd,Mfap2,Map6,Flnb,Vasp,Pdpn,Gas1,Igf1r,Parva,Clec1b,Coro1a,Rhou,Tgfb2,Tet1,Coch,Matn2,Slit3,Rbfox2,Arhgef25,Wasf3,Fermt2,Ephb3,Palld,Vim,Spi1,Ndn,Dtnbp1,Cd44,Ptn,B4galt6,Rhog,Xlr4b,Nes,Fbxw8,Itgb1,Lipa,Bin3,Atp9a,Gdi1…
EXPORT FROM CELL (GO: BP)	5.3897e-06	0.0006107	0.610527	-0.2968	-1.44475	868	Ncam1,Sytl1,Oxct1,Inhba,Tango6,Lgals3,Tspan4,Cd177,Rab44,Fcer1g,Tspan9,Cavin1,Rac2,Rab3d,Fgr,Prickle1,Rab34,Itgb2l,Rap1b,Comp,Gnai2,Ralb,Chmp2a,Mcu,Il1b,Anxa1,Stxbp2,Igfbp3,Myh10,Itgb2,Ccn2,P2rx1,Tgfb3,Anxa2,Acsl4,Anxa3,Septin5,Coro1a,Hcar2,Rab27a,Cpe,Tgfb2,Ms4a2,Nucb2,Abcc5,Exoc1,Slc30a2,Spi1,Tfr2,C1qtnf12,Dtnbp1,Xlr4b,Clnk,Slc8b1,Tfap2b,Creb3l1,Il1rn,Atp9a,Cbarp,Nkg7,Ica1,Camk2n1,Cd84,Myo1f,Anx…
REGULATION OF LOCOMOTION (GO: BP)	3.59563e-06	0.00045417	0.627257	-0.296929	-1.45315	1003	Cited2,Mmp9,Lcn2,Lgals3,Cd63,S100a11,Erdr1x,Cavin1,Rhoc,Arhgdib,Adam15,Flna,Rac2,Thy1,Tmsb4x,Elane,Thbs1,Cnn2,Hoxa7,Cd9,Itga2b,Fgr,Ccn4,Sema3f,Efemp1,Lama5,Gnai2,Zfp609,Adam8,Actn4,Ccn1,Postn,Zfp703,Mcu,Gpsm3,Phldb2,Insr,Vsir,Il1b,Anxa1,Cfl1,Igfbp3,Aldoa,Tpm1,Mapk3,Ctsh,Pfn1,Dach1,Sorl1,Timp1,Adgrg3,Sfrp2,Slurp1,Mmp12,Pdgfa,Pdpn,Reck,Igf1r,Fam83h,Anxa3,Gpi1,Arpc2,Coro1a,Tgfb2,Cemip,Tet1,Ccl6,Cav1…
TUBE MORPHOGENESIS (GO: BP)	4.89493e-06	0.000582446	0.610527	-0.299472	-1.45638	863	Cited2,Ngp,Mmp9,Chi3l1,Lcn2,Lgals3,Enah,Cybb,Rbpj,Rspo3,Camp,Adam15,Flna,Thy1,Thbs1,Itga2b,Prickle1,Itgb2l,Lama5,Comp,Adam8,Ccn1,Il1b,Anxa1,Cfl1,Itgb2,Ccn2,Pkm,Ctsh,Pfn1,Cnmd,Prrx2,Sfrp2,Fkbp10,Lrg1,Anxa2,Pdgfa,Rspo2,Cspg4,Vasp,Pdpn,Reck,Parva,Anxa3,Tgfb2,Cav1,Sulf1,Cela1,Hspb1,Fgf18,Ephb3,Spi1,Cd44,Ptn,Ndnf,Serpinf1,Lzts2,Col8a1,Mmp19,Hbegf,Tfap2b,Itgb1,Dlg5,Creb3l1,Smoc2,Col4a2,Xdh,Megf8,Fmnl3,…
ORGANIC ACID METABOLIC PROCESS (GO: BP)	2.06192e-05	0.00186907	0.57561	-0.301893	-1.45988	774	Atf4,Foxk1,Faah,Tecr,Lta4h,Adpgk,Spr,Plod3,Slc7a11,Selenon,Insr,Pcbd1,Pgd,Il1b,Anxa1,Aldoa,Col6a1,Lpl,Pkm,Elovl1,Asah1,Gfpt1,Ldha,Decr1,Sirt2,Ech1,Acsl4,Pdpn,Gpi1,Azin2,Degs1,Cav1,Nucb2,Gamt,Chst12,Asns,Gcdh,Gatm,Gale,Gapdh,Alox5ap,Etfb,Lipa,Papss2,Nudt7,Eno3,Fads3,Slc27a4,P4ha3,Acly,Slc1a3,As3mt,Asl,Ier3,Acsl6,Apoc1,Eno1,Mecr,Ephx1,Folr1,Aoah,Acot7,Acadvl,P4hb,Akr1a1,Mlx,Mlst8,Cyp1b1,Gnpat,Tnfrs…
GENERATION OF PRECURSOR METABOLITES AND ENERGY (GO: BP)	0.000323277	0.0139936	0.498493	-0.316251	-1.46401	433	Oxct1,Foxk1,Rbpj,Tkt,Cox6a1,Adpgk,Selenon,Insr,Pgd,Aldoa,Col6a1,Pkm,Gfpt1,Ldha,Gyg1,Gaa,Gpi1,Gys1,Adra1b,Pgm1,Phkb,Gale,Gapdh,Etfb,Lipa,Rpia,G6pdx,Eno3,Cavin3,Acly,Slc1a3,Ndufa13,Ier3,Nfatc4,Eno1,Gnas,Mtfr1l,Mlx,Mlst8,Ndufa8,Sco2,Shpk,App,Sdha,Nupr1,Cox17,Cox4i1,Ndufb7,Ndufv3,Atp5f1e,Aco2,Ndufb8,Actn3,Acox1,Cox8a,Arl2,Ndufb6,Oas1c,Grb10,Tnf,Trap1,Wdr45b,Ndufs1,Sdhaf4,Hk2,Pgam1,Hk1,Cox10,Uqcrc1,Ei…
GLYCOPROTEIN METABOLIC PROCESS (GO: BP)	0.000902514	0.0302342	0.477271	-0.325374	-1.46658	315	St3gal5,Chst13,Fut10,St6galnac6,Plod3,Ddost,Insr,Gfpt1,Mmp12,Slc35c2,Tet1,Dad1,Magt1,Itm2b,Sulf1,Cela1,St3gal3,Chst12,Hbegf,Mgat2,Fbxo27,St6galnac4,Dpm1,Galns,Galnt17,Tmem59,Rpn1,Chpf,Hexa,Pofut2,Mfsd8,Cst3,Gpc1,Hexb,Chpf2,Man1b1,B3gnt9,Chst7,Mgat3,Alg1,Prkcsh,Bcl2,Poglut3,Tnip1,Glce,Ostc,Aga,Galnt14,Gmppa,Slc35d2,Chst11,Pomk,Pawr,Col2a1,Srd5a3,Poglut1,Hs6st2,B3galnt1,Ptx3,Atp4b,Rxylt1,Alg13,Uggt…
SECRETION (GO: BP)	3.25593e-06	0.000423568	0.627257	-0.301185	-1.47005	905	Ncam1,Sytl1,Oxct1,Inhba,Tango6,S100a8,Lgals3,Cyba,Cd177,Aprt,Rab44,Fcer1g,Cavin1,Rac2,S100a9,Rab3d,Fgr,Prickle1,Rab34,Itgb2l,Rap1b,Comp,Gnai2,Ralb,Chmp2a,Mcu,Il1b,Anxa1,Stxbp2,Igfbp3,Myh10,Itgb2,Ccn2,P2rx1,Tgfb3,Anxa2,Acsl4,Anxa3,Septin5,Coro1a,Hcar2,Rab27a,Cpe,Tgfb2,Ms4a2,Cav1,Nucb2,Exoc1,Spi1,Tfr2,C1qtnf12,Dtnbp1,Xlr4b,Clnk,Slc8b1,Tfap2b,Creb3l1,Il1rn,Atp9a,Xdh,Cbarp,Nkg7,Ica1,Abcc3,Camk2n1,Cd8…
REGULATION OF VASCULATURE DEVELOPMENT (GO: BP)	0.00161421	0.0458949	0.45506	-0.330396	-1.47531	283	Ngp,Mmp9,Chi3l1,Lgals3,Cybb,Camp,Thbs1,Itgb2l,Il1b,Itgb2,Pkm,Ctsh,Cnmd,Sfrp2,Lrg1,Reck,Angptl7,Anxa3,Tgfb2,Sulf1,Cela1,Hspb1,Fgf18,Ptn,Serpinf1,Itgb1,Creb3l1,Smoc2,Col4a2,Pik3cb,Ccl2,Rras,Hgs,Tnn,Cyp1b1,Tnfrsf1a,Pik3r6,Sparc,Grem1,Itga5,Fbln5,Tafa5,Tnf,Nrp1,Thbs2,Mydgf,Vegfc,Serpine1,Ecm1,Hk2,Naxe,Emilin1,Epn2,Sema4a,Efna3,Ceacam1,Itgb3,Nfe2l2,Hspb6,Fgf1,Flt1,Rela,Adgra2,Ccr3,Ddah1,Rnh1,Emp2,Notc…
CELL CHEMOTAXIS (GO: BP)	0.00112796	0.0355352	0.45506	-0.330933	-1.47663	279	Mmp9,S100a8,Lgals3,Fcer1g,Rac2,S100a9,Thbs1,Arrb2,Trem3,Itgb2l,Retnlg,Adam8,Mcu,Gpsm3,Il1b,Anxa1,Itgb2,Mapk3,Ctsg,Parva,Coro1a,Ccl6,Hspb1,Fgf18,Spi1,Ptn,Rhog,Tirap,Hbegf,Slc8b1,Smoc2,Cxcl14,Rab13,Ccl2,Slit2,Csf1,Mmp2,Ccr6,App,Csf3r,Pf4,Trpm2,Grem1,Bsg,Cxcl15,Cklf,Itgam,Lox,Rac1,Rps19,Nrp1,Vegfc,Serpine1,Jam3,Spp1,Ppib,Ffar2,Ptprj,Bin2,Ccn3,Fgf1,Flt1,Ifng,Ptk2,Lbp,Ccr3,Stk39,Mospd2,Cxcl12,Cxcr2,Pd…
ANGIOGENESIS (GO: BP)	0.000107664	0.00686348	0.538434	-0.314847	-1.48044	505	Ngp,Mmp9,Chi3l1,Lgals3,Cybb,Rbpj,Rspo3,Camp,Adam15,Flna,Thy1,Thbs1,Itga2b,Itgb2l,Adam8,Ccn1,Il1b,Anxa1,Itgb2,Ccn2,Pkm,Ctsh,Cnmd,Sfrp2,Lrg1,Anxa2,Pdgfa,Cspg4,Reck,Parva,Anxa3,Tgfb2,Cav1,Sulf1,Cela1,Hspb1,Fgf18,Ephb3,Ptn,Ndnf,Serpinf1,Col8a1,Mmp19,Hbegf,Itgb1,Creb3l1,Smoc2,Col4a2,Fmnl3,Pik3cb,Ccl2,Slit2,Meox2,Nfatc4,Pik3r2,Rras,Mmp2,Hgs,Fn1,Tnn,Cdc42,Bmp4,Cyp1b1,Col4a1,Tnfrsf1a,Pik3r6,Cald1,Sparc,N…
SENSORY ORGAN MORPHOGENESIS (GO: BP)	0.00144711	0.0419172	0.45506	-0.337169	-1.4877	257	Cited2,Atf4,Thy1,Rom1,Mapk3,Prrx2,Col5a1,Mfap2,Gas1,Ptn,Col8a1,Dio3,Gfi1,Ski,Irx5,Cthrc1,Bmp4,Sobp,Lhx1,Nrl,Fzd6,Insig2,Eya4,Col5a2,Prkra,Fgfr3,Ttc39c,Rac1,Grcc10,Prrx1,Bcl2,Casz1,Fat1,Cfh,Pitx2,Tshr,Col2a1,Sod1,Flt1,Msx1,Prom1,Aqp5,Mfn2,Phactr4,Fzd2,Tbc1d20,Fgf10,Ednra,Mfap5,Cdon,Gnat2,Gdf11,Tmie,Fasl,Meis1,Tshz1,Agtpbp1,Gata3,Pax2,Ppp2r3a,Osr1,Spry2,Six4,Col11a1,Prdm1,Adamts9,Mafb,Pls1,Chd7,Tbx…
REGULATION OF SYNAPSE STRUCTURE OR ACTIVITY (GO: BP)	0.000837009	0.0288402	0.477271	-0.329842	-1.48959	318	Adgrl1,Adgrl2,L1cam,Dmpk,Prickle1,Sema3f,Slc7a11,Cfl1,Myh10,Ephb3,Dtnbp1,Ptn,Xlr4b,Itgb1,Dlg5,Zdhhc8,Prnp,Dctn1,Nedd4,Slit2,Clstn1,Nfatc4,Gpm6a,Vldlr,Pgrmc1,Plxnc1,Cdc42,Crtac1,Lhfpl4,App,Actr3,Pak3,Sparc,Nrp2,Farp1,Cln3,Adnp,Tuba1a,Vstm5,Rac1,Gpc4,Tnf,Cdh2,Lrfn3,Dbnl,Thbs2,Nrn1,Mfn1,Tubb5,Caprin2,Fcgr2b,Sema4a,Rps6ka5,Vps35,Lrrtm3,Tsc2,Tlr2,Arhgap44,Nrg1,Cask,Abi3bp,Efna5,Flrt2,Ptk2,Neurl1a,Dnm3…
SYNAPSE ORGANIZATION (GO: BP)	5.40937e-05	0.00416792	0.557332	-0.317078	-1.49063	525	Adgrl1,Adgrl2,L1cam,Flna,Actb,Dmpk,Prickle1,Palm,Sema3f,Rap1b,Lama5,Slc7a11,Insr,Cfl1,Myh10,Lamb2,Pfn1,Igf1r,Synpo,Wasf3,Ephb3,Palld,Dtnbp1,Ptn,Xlr4b,Itgb1,Dlg5,Zdhhc8,Prnp,Dctn1,Nedd4,Slit2,Nptxr,Clstn1,Nfatc4,Get1,Gpm6a,Vldlr,Pgrmc1,Plxnc1,Cdc42,Nptn,Snapin,Sncg,Gnpat,Col4a1,Crtac1,Lhfpl4,App,Actr3,Pak3,Sparc,Nrp2,Farp1,Cln3,Pin1,Hdac6,Adnp,Tenm4,Cacnb3,Tuba1a,Vstm5,Itgam,Rac1,Gpc4,Tnf,Nrp1,Cdh…
POSITIVE REGULATION OF MAPK CASCADE (GO: BP)	6.74848e-05	0.00499971	0.538434	-0.323007	-1.49352	446	Pde8a,Chi3l1,Inhba,Timp2,Thbs1,Arrb2,Rap1b,Gnai2,Adam8,Insr,Il1b,Ltbr,Igfbp3,Ccn2,Mapk3,Tgfb3,Pdgfa,Cspg4,Igf1r,Dok2,Adra1b,Tgfb2,Fgf18,Fermt2,Spi1,Lamtor2,Cd44,Tirap,Trim30b,Rps3,Dnajc27,Xdh,Cavin3,Cd84,Osm,Card9,Acta2,Cdc42,Nptn,Bmp4,Cd81,Ddr2,Pik3r6,Igfbp6,App,Unc5cl,Gsdme,Lrp1,P2ry6,Rell1,Ilk,Cracr2a,Fgfr3,Wnt16,Rnf13,Tnf,Iqgap3,Nrp1,Cdh2,Pak1,Nod1,Egfr,Glipr2,Phb1,Mydgf,Tpd52l1,Fcgr2b,Ndrg4,…
VASCULATURE DEVELOPMENT (GO: BP)	6.78801e-06	0.000726411	0.610527	-0.30928	-1.49353	731	Cited2,Ngp,Mmp9,Chi3l1,Lgals3,Cybb,Rbpj,Rspo3,Camp,Adam15,Flna,Thy1,Thbs1,Itga2b,Prickle1,Itgb2l,Comp,Adam8,Ccn1,Rom1,Il1b,Anxa1,Myh10,Itgb2,Ccn2,Pkm,Ctsh,Cnmd,Prrx2,Sfrp2,Col5a1,Fkbp10,Lrg1,Anxa2,Pdgfa,Cspg4,Pdpn,Reck,Gaa,Parva,Angptl7,Mexis,Anxa3,Tgfb2,Cav1,Sulf1,Cela1,Hspb1,Fgf18,Ephb3,Spi1,Ptpn14,Ptn,Ndnf,Serpinf1,Col8a1,Mmp19,Hbegf,Tfap2b,Fbxw8,Itgb1,Lipa,Creb3l1,Smoc2,Col4a2,Xdh,Megf8,Fmnl3…
ANIMAL ORGAN MORPHOGENESIS (GO: BP)	5.2028e-07	0.00010655	0.659444	-0.305689	-1.49382	948	Cited2,Ltf,Atf4,Inhba,Rbpj,Adam15,Flna,Zmpste24,Pbx2,Thy1,Ltbp3,Thbs1,Hoxa7,Fgr,Prickle1,Lama5,Comp,Plod3,Rogdi,Ccn1,Insr,Rom1,Lamb2,Ccn2,Col6a1,Nfic,Tpm1,Mapk3,Ctsh,Dync2i1,Tgfb3,Prrx2,Sfrp2,Col5a1,Mfap2,Pdgfa,Rspo2,Gas1,Igf1r,Gaa,Parva,Lims1,Cpe,Tgfb2,Cav1,Sulf1,Cela1,Slit3,Gamt,Hoxa9,Fgf18,Capn1,Cd44,Ptn,Serpinh1,Lzts2,Col8a1,Dlg5,Lipa,Col10a1,Megf8,Nedd4,Rflnb,Fhl2,Dio3,Slit2,Gfi1,Csf1,Efemp2…
SMALL MOLECULE CATABOLIC PROCESS (GO: BP)	0.000999664	0.0327762	0.45506	-0.334642	-1.49749	288	Oxct1,Foxk1,Faah,Pgd,Aldoa,Pkm,Ldha,Decr1,Gpi1,Gcdh,Gale,Gapdh,Etfb,Nudt7,Gda,Xdh,Eno3,Slc27a4,Eno1,Acot7,Acadvl,Akr1a1,Abcd2,Hexa,Sdsl,Scp2,Hexb,Actn3,Acox1,Glo1,Mccc2,Enpp4,Hk1,Aldh1a7,Nudt1,Sesn2,Hdc,Tysnd1,Hsd17b10,Pex5,Srd5a3,Aldh4a1,Nqo2,Acadsb,Crat,Tpi1,Acad8,Abhd3,Npl,Gatd1,Ddah1,Gstz1,Abhd1,Ces1d,Lpin1,Mlycd,Pex2,Acad11,Aldh5a1,Lpin3,Galm,Acadl,Dao,Sardh,Dcxr,Pfkl,Eci1,Mpi,Abcd3,Arg2,Dhd…
CELL SURFACE RECEPTOR PROTEIN SERINE THREONINE KINASE SIGNALING PATHWAY (GO: BP)	0.00123624	0.0376492	0.45506	-0.331198	-1.49925	331	Cited2,Inhba,Rbpj,Zyx,Ltbp3,Thbs1,Arrb2,Fos,Lrrc32,Comp,Htra1,Selenon,Ccn1,Zfp703,Vsir,Mapk3,Sorl1,Tgfb3,Sfrp2,Lrg1,Tgfb2,Tet1,Cav1,Sulf1,Fermt2,Spi1,Fstl1,Tfap2b,Itgb1,Megf8,Rasl11b,Ccl2,Tgfb1i1,Ltbp1,Csnk2b,Ski,Folr1,Bmp4,Col1a2,Sfrp1,Lrp1,Pmepa1,Pin1,Ilk,Grem1,Col3a1,Wwtr1,Lefty1,Lox,Dnm2,Glce,Prmt1,Emilin1,Chst11,Scx,Prdm16,Ccn3,Aspn,Fstl3,Tmem53,Fbn2,Crim1,Msx1,Ptk2,Fst,Neo1,Rbpms,Dact1,Appl…
BLOOD VESSEL MORPHOGENESIS (GO: BP)	1.58909e-05	0.00154986	0.57561	-0.314996	-1.50003	600	Cited2,Ngp,Mmp9,Chi3l1,Lgals3,Cybb,Rbpj,Rspo3,Camp,Adam15,Flna,Thy1,Thbs1,Itga2b,Itgb2l,Comp,Adam8,Ccn1,Il1b,Anxa1,Itgb2,Ccn2,Pkm,Ctsh,Cnmd,Prrx2,Sfrp2,Fkbp10,Lrg1,Anxa2,Pdgfa,Cspg4,Reck,Parva,Anxa3,Tgfb2,Cav1,Sulf1,Cela1,Hspb1,Fgf18,Ephb3,Spi1,Ptn,Ndnf,Serpinf1,Col8a1,Mmp19,Hbegf,Tfap2b,Itgb1,Creb3l1,Smoc2,Col4a2,Xdh,Megf8,Fmnl3,Nedd4,Pik3cb,Ccl2,Slit2,Meox2,Nfatc4,Pik3r2,Efemp2,Rras,Mmp2,Folr1,…
SUPRAMOLECULAR FIBER ORGANIZATION (GO: BP)	2.12068e-06	0.00030436	0.627257	-0.311679	-1.50604	748	Capg,Actn1,Enah,Clu,Rhoc,Camp,Rnd3,Flna,Rac2,Zyx,Tmsb4x,Cnn2,Ccdc88b,Comp,Plod3,Actn4,Selenon,Phldb2,Esam,Cfl1,Myh10,Ccn2,Col6a1,Tpm1,Pfn1,Tgfb3,Sfrp2,Samd14,Col5a1,Arpc1b,Fkbp10,Inpp5j,Anxa2,Vasp,Synpo,Gpr65,Arpc2,Coro1a,Rhou,Tgfb2,Cav1,Clip3,Col14a1,Myl9,Wasf3,Fermt2,Capn1,Vim,Pdlim1,Serpinh1,Cryab,Rhog,Rnd1,Itgb1,Rps3,Tpm2,Sptan1,Clip4,Vill,Msrb1,Gda,Lima1,Dctn1,Rflnb,Rnd2,Myo1f,Slit2,Msrb2,As…
IMPORT INTO CELL (GO: BP)	9.78976e-07	0.000167622	0.643552	-0.311365	-1.5097	842	Dnajc6,Lcn2,Eps15,Lgals3,Cyba,Spon2,Cd177,Cd63,Fcer1g,Clu,Ifitm3,Actb,Elane,Thbs1,Cnn2,Cd9,Prtn3,Flot1,Arrb2,Fgr,Siglece,Rab34,Rab20,Cd300lf,Ralb,Actn4,Slc7a11,Tyrobp,Insr,Ncf4,Anxa1,Itgb2,Vamp4,Mapk3,Sorl1,P2rx1,Cebpe,Slc39a11,Snx3,Anxa2,Sirt2,Lilrb4b,Anxa3,Coro1a,Rhou,Rab27a,Cav1,Clip3,Calm1,Xkr8,Tfr2,Dtnbp1,Cd44,Capn2,Pacsin3,Mycbpap,Itgb1,Lipa,Bin3,Atp9a,Prnp,Nedd4,Myo1f,Slc27a4,Unc13d,Pik3cb…
LEUKOCYTE CHEMOTAXIS (GO: BP)	0.00122553	0.0376202	0.45506	-0.354917	-1.51356	208	Mmp9,S100a8,Lgals3,Fcer1g,Rac2,S100a9,Thbs1,Trem3,Itgb2l,Retnlg,Adam8,Mcu,Gpsm3,Il1b,Anxa1,Itgb2,Mapk3,Ctsg,Coro1a,Ccl6,Spi1,Ptn,Tirap,Slc8b1,Cxcl14,Ccl2,Slit2,Csf1,Mmp2,Ccr6,App,Csf3r,Pf4,Trpm2,Grem1,Bsg,Cxcl15,Cklf,Itgam,Rac1,Rps19,Vegfc,Serpine1,Jam3,Spp1,Ppib,Ffar2,Ptprj,Ccn3,Flt1,Ifng,Ptk2,Lbp,Ccr3,Stk39,Mospd2,Cxcl12,Cxcr2,Ednra,C5ar1,Rin3,Mdk,Cxadr,Vegfb,Plec,Pla2g7,Cxcl2,Ninj1,Calr,Itga1,…
POSITIVE REGULATION OF LOCOMOTION (GO: BP)	1.75894e-05	0.00166377	0.57561	-0.318796	-1.51839	588	Mmp9,Lcn2,Lgals3,S100a11,Cavin1,Rhoc,Flna,Rac2,Thy1,Tmsb4x,Thbs1,Itga2b,Fgr,Ccn4,Sema3f,Gnai2,Zfp609,Adam8,Actn4,Ccn1,Postn,Zfp703,Mcu,Gpsm3,Insr,Vsir,Il1b,Anxa1,Cfl1,Aldoa,Mapk3,Ctsh,Pfn1,Pdgfa,Pdpn,Igf1r,Fam83h,Anxa3,Gpi1,Arpc2,Coro1a,Tgfb2,Cemip,Ccl6,Cav1,Hspb1,Sun2,Fgf18,Fermt2,Spi1,Ptn,Tirap,Hbegf,Itgb1,Smoc2,Epcam,Cxcl14,Megf8,Myo1f,Cldn1,Pik3cb,Ccl2,Slit2,Csf1,Cd99l2,Rack1,Rras,Mmp2,Fn1,Se…
CIRCULATORY SYSTEM DEVELOPMENT (GO: BP)	3.7088e-08	1.36077e-05	0.719513	-0.308395	-1.52048	1097	Ncam1,Cited2,Ngp,Mmp9,Chi3l1,Inhba,Lgals3,Cybb,Rbpj,Rspo3,Camp,Adam15,Flna,Zmpste24,Thy1,Thbs1,Itga2b,Arrb2,Prickle1,Ccn4,Itgb2l,Comp,Adam8,Ccn1,Insr,Rom1,Il1b,Anxa1,Jph2,Myh10,Itgb2,Ccn2,Col6a1,Pkm,Nxn,Tpm1,Mapk3,Ctsh,Cnmd,Tgfb3,Prrx2,Sfrp2,Col5a1,Fkbp10,Lrg1,Anxa2,Pdgfa,Cspg4,Pdpn,Reck,Gaa,Parva,Angptl7,Mexis,Anxa3,Gys1,Cpe,Adra1b,Tgfb2,Cav1,Kdm6b,Odad3,Sulf1,Col14a1,Cela1,Slit3,Hspb1,Fgf18,Eph…
TUBE DEVELOPMENT (GO: BP)	1.84871e-08	8.65669e-06	0.733762	-0.308762	-1.5206	1063	Cux1,Cited2,Ngp,Mmp9,Chi3l1,Lcn2,Lgals3,Enah,Cybb,Rbpj,Rspo3,Camp,Adam15,Flna,Thy1,Ltbp3,Thbs1,Itga2b,Prickle1,Itgb2l,Lama5,Comp,Plod3,Adam8,Slc7a11,Selenon,Ccn1,Il1b,Anxa1,Cfl1,Itgb2,Ccn2,Col6a1,Pkm,Mapk3,Ctsh,Pfn1,Cnmd,Asah1,Tgfb3,Prrx2,Sfrp2,Fkbp10,Lrg1,Anxa2,Mmp12,Pdgfa,Rspo2,Cspg4,Vasp,Pdpn,Reck,Gas1,Parva,Anxa3,Tgfb2,Cav1,Sulf1,Cela1,Hspb1,Fgf18,Ephb3,Spi1,Cd44,Ptn,Ndnf,Serpinf1,Lzts2,Col8a…
CELL ADHESION (GO: BP)	2.52987e-09	1.94927e-06	0.774939	-0.308064	-1.52792	1266	Ncam1,Adgrl1,Tjp3,Cited2,S100a8,Lgals3,Spon2,Tnfsf13b,Cd177,L1cam,Cd63,Actn1,Rbpj,Tspan9,Flot2,Adam15,Flna,Rac2,Zyx,S100a9,Thy1,Actb,Elane,Thbs1,Hoxa7,Cd9,Flot1,Itga2b,Col16a1,Prickle1,Ccdc88b,Siglece,Ccn4,Col6a2,Itgb2l,Lrrc32,Lama5,Comp,Zfp609,Adam8,Actn4,Slc7a11,Ccn1,Postn,Zfp703,Phldb2,Rom1,Vsir,Esam,Il1b,Anxa1,Alcam,Cfl1,Myh10,Lamb2,Itgb2,Ccn2,Col6a1,Tpm1,Ctsg,Col5a1,Plaur,Lrg1,Anxa2,Mmp12,Rp…
RECEPTOR MEDIATED ENDOCYTOSIS (GO: BP)	0.000519161	0.0202027	0.477271	-0.346483	-1.52948	256	Dnajc6,Eps15,Cd63,Fcer1g,Clu,Ifitm3,Cd9,Flot1,Arrb2,Ralb,Insr,Itgb2,Sorl1,Anxa2,Sirt2,Lilrb4b,Cav1,Tfr2,Dtnbp1,Cd44,Itgb1,Nedd4,Vldlr,Apoc1,Fnbp1l,Hgs,Wdr54,Ap2m1,Cd81,Dnm1,App,Lrp1,Cln3,Grem1,Snx17,Itgam,Tpcn2,Dnm2,Serpine1,Atad1,Fcgr2b,Hspg2,Akap5,Ceacam1,Tfrc,Canx,Itgb3,Stab2,Nrg1,Usp46,Grb2,Ache,B2m,Dnm3,Sgip1,Ncdn,Ophn1,Lrpap1,Efnb2,C3,Htr1b,Arf1,Cxcr2
POSITIVE REGULATION OF NERVOUS SYSTEM DEVELOPMENT (GO: BP)	0.000286469	0.0126853	0.498493	-0.336982	-1.53361	342	Cux1,Adgrl1,Adgrl2,L1cam,Arrb2,Il1b,Map6,Ephb3,Vim,Ptn,Serpinf1,Xlr4b,Fbxw8,Itgb1,Dlg5,Gdi1,Megf8,Rnd2,Mag,Slit2,Hapln1,Clstn1,Fn1,Plxnc1,Nptn,Crabp2,Actr3,Pak3,Lrp1,Id2,Ilk,Adnp,Tenm4,E2f1,Vstm5,Tiam2,Tnf,Cul7,Rpl4,Nrp1,Dbnl,Tspo,Pak1,Thbs2,Egfr,Vegfc,Xrcc5,Mfn1,Caprin2,Mapt,Tle6,Mme,Sema4a,Smo,Akap5,Lrrtm3,Plxna4,Tlr2,Bex1,Fzd4,Nrg1,Bag1,Flt1,Rela,Cask,Ifng,Efna5,Flrt2,Ache,Gper1,Ptk2,Neurl1a,M…
REGULATION OF ANATOMICAL STRUCTURE MORPHOGENESIS (GO: BP)	3.27876e-07	7.21796e-05	0.674963	-0.317101	-1.53751	842	Cux1,Cited2,Zmym3,Ngp,Mmp9,Chi3l1,Lcn2,Lgals3,Tnfsf13b,L1cam,Cybb,Rbpj,Camp,Zmpste24,Thy1,Thbs1,Fgr,Palm,Sema3f,Itgb2l,Mcu,Phldb2,Il1b,Anxa1,Cfl1,Myh10,Aldoa,Itgb2,Pkm,Tpm1,Ctsh,Cnmd,Sfrp2,Lrg1,Map6,Pdgfa,Rspo2,Pdpn,Reck,Parva,Anxa3,Coro1a,Rhou,Cpe,Tgfb2,Coch,Tmbim1,Sulf1,Cela1,Hspb1,Fgf18,Wasf3,Fermt2,Ephb3,Vim,Dtnbp1,Cd44,Ptn,Serpinf1,Rhog,Xlr4b,Fbxw8,Itgb1,Creb3l1,Smoc2,Col4a2,Gdi1,Mpl,Megf8,F…
LEUKOCYTE MIGRATION (GO: BP)	0.000114476	0.00722983	0.538434	-0.339554	-1.54251	350	Mmp9,S100a8,Lgals3,Cd177,Fcer1g,Rac2,S100a9,Thy1,Elane,Thbs1,Cnn2,Hoxa7,Cd9,Prtn3,Itga2b,Trem3,Itgb2l,Retnlg,Adam8,Mcu,Gpsm3,Il1b,Anxa1,Itgb2,Mapk3,Ctsg,Coro1a,Ccl6,Capn1,Spi1,Ptn,Tirap,Slc8b1,Itgb1,Cxcl14,Myo1f,Ccl2,Slit2,Csf1,Cd99l2,Mmp2,Ccr6,Cdc42,Cd81,App,Csf3r,Tnfrsf18,Pf4,Trpm2,Grem1,Bsg,Cxcl15,Cklf,Itgam,Rac1,Tnf,F11r,Rps19,Fadd,Vegfc,Serpine1,Ecm1,Emilin1,Jam3,Spp1,Ppib,Gba1,Pawr,Ffar2,It…
REGULATION OF BODY FLUID LEVELS (GO: BP)	0.000358704	0.0150207	0.498493	-0.347728	-1.54725	278	Cyba,Aprt,Fcer1g,Tspan9,Flna,S100a9,Thbs1,Cd9,Prickle1,Comp,Gnai2,Slc7a11,P2rx1,Ctsg,Plaur,Anxa2,Pdgfa,Pdpn,Rab27a,Cav1,Dtnbp1,Adamts13,Gp5,Papss2,Xdh,Anxa5,Pik3cb,Anxa8,Zbtb7b,Vamp8,Slc5a2,Pdia3,Gnas,Treml1,Atg7,Entpd2,Sytl2,Fzd6,Svep1,F2rl2,Vwf,Nbeal2,F11r,Fosl2,Stxbp3,Egfr,Serpine1,Plat,Enpp4,Cfh,Ceacam1,Ptprj,Itgb3,Tmx1,Plek,Nfe2l2,Ubash3a,Mertk,Ddr1,Aqp5,Neurl1a,P2ry1,F2rl3,Serpine2,Aqp3,Emp…
LOCOMOTION (GO: BP)	4.6372e-09	3.24815e-06	0.761461	-0.313976	-1.5501	1141	Cited2,Mmp9,Lcn2,S100a8,Lgals3,Ear2,Cd63,Fcer1g,S100a11,Erdr1x,Cavin1,Rhoc,Arhgdib,Adam15,Flna,Rac2,S100a9,Thy1,Tmsb4x,Elane,Thbs1,Cnn2,Hoxa7,Cd9,Itga2b,Arrb2,Trem3,Fpr2,Fgr,Ccn4,Sema3f,Itgb2l,Efemp1,Lama5,Gnai2,Zfp609,Retnlg,Adam8,Actn4,Rogdi,Ccn1,Postn,Zfp703,Mcu,Gpsm3,Phldb2,Insr,Vsir,Il1b,Anxa1,Cfl1,Igfbp3,Aldoa,Itgb2,Col6a1,Tpm1,Mapk3,Ctsh,Pfn1,Dach1,Sorl1,Timp1,Ctsg,Adgrg3,Sfrp2,Slurp1,Mmp1…
EXOCYTOSIS (GO: BP)	0.000118922	0.00733034	0.538434	-0.34208	-1.55506	338	Ncam1,Sytl1,Cd177,Rab44,Fcer1g,Rac2,Rab3d,Fgr,Itgb2l,Rap1b,Gnai2,Ralb,Chmp2a,Anxa1,Stxbp2,Myh10,Itgb2,P2rx1,Anxa2,Anxa3,Septin5,Coro1a,Rab27a,Ms4a2,Exoc1,Spi1,Dtnbp1,Clnk,Atp9a,Cbarp,Nkg7,Cd84,Myo1f,Unc13d,Rab13,Hck,Fes,Scrn1,Vamp8,Hgs,Snapin,Rab40b,Sytl2,Lamp1,Rab27b,Ptgdr,Itgam,Exoc6b,Otof,Syde1,Arl8b,Tpcn2,Stxbp3,Tmed10,Pak1,Scamp1,Stx2,Sacm1l,Wdr41,Prepl,Rab3b,Baiap3,Plek,Slc18a2,Myh9,Smcr8,C…
CELL MOTILITY (GO: BP)	2.36566e-12	6.07581e-09	0.898671	-0.309728	-1.5553	1580	Cited2,Mmp9,Lcn2,S100a8,Lgals3,Cd177,L1cam,Cd63,Fcer1g,S100a11,Erdr1x,Enah,Cavin1,Rhoc,Arhgdib,Rnd3,Adam15,Flna,Rac2,S100a9,Thy1,Fut10,Tmsb4x,Actb,Elane,Thbs1,Cnn2,Hoxa7,Cd9,Prtn3,Itga2b,Arrb2,Trem3,Fgr,Prickle1,Ccn4,Sema3f,Itgb2l,Efemp1,Lama5,Gnai2,Ier2,Zfp609,Retnlg,Adam8,Actn4,Ccn1,Postn,Zfp703,Mcu,Gpsm3,Phldb2,Insr,Vsir,Il1b,Anxa1,Cfl1,Igfbp3,Myh10,Lamb2,Aldoa,Itgb2,Ccn2,Tpm1,Mapk3,Ctsh,Pfn1,…
CELL PROJECTION MORPHOGENESIS (GO: BP)	7.31541e-07	0.000135594	0.659444	-0.325226	-1.55617	651	Ncam1,Cux1,L1cam,Unc5a,Enah,Clu,Thy1,Actb,Flot1,Prickle1,Sema3f,Lama5,Postn,Alcam,Cfl1,Myh10,Lamb2,Map6,Vasp,Pdpn,Gas1,Igf1r,Tgfb2,Tet1,Matn2,Slit3,Rbfox2,Arhgef25,Ephb3,Vim,Ndn,Dtnbp1,Cd44,Ptn,B4galt6,Xlr4b,Nes,Fbxw8,Itgb1,Atp9a,Gdi1,Kidins220,Megf8,Nedd4,Rnd2,Mag,Rere,Slit2,Cdh11,Nfatc4,Sdc2,Gpm6a,Vldlr,Fn1,Sema3c,Tnn,Plxnc1,Cdc42,Nexn,Ttl,Lhx1,Atg7,Crabp2,App,Actr3,Pak3,Nrp2,Farp1,Nckap1,Lrp1,…
DEFENSE RESPONSE TO BACTERIUM (GO: BP)	0.00056219	0.0211301	0.477271	-0.355965	-1.55654	245	Ltf,Lyz2,Lcn2,Pglyrp1,Cyba,Ear2,Spon2,Hp,Fcer1g,Rbpj,Camp,Elane,Trem3,Fgr,Rab34,Wfdc21,Slpi,Il1b,Jchain,Ctsg,Anxa3,Fau,Igha,Tirap,Romo1,Myo1f,Hck,Gsdmd,Card9,Colec12,Tnfrsf1a,Mpo,App,Ncf1,Prg2,Ssc5d,Ear6,Slc11a1,Ppp1r11,Clec4d,Oas1c,Tnf,Rps19,Nod1,Ear1,Serpine1
CARBOHYDRATE DERIVATIVE METABOLIC PROCESS (GO: BP)	5.18411e-08	1.81562e-05	0.719513	-0.319378	-1.5616	928	Tk1,Chil3,Chi3l1,Pglyrp1,St3gal5,Chst13,Foxk1,Aprt,Tkt,Fut10,Pfkfb4,Adpgk,St6galnac6,Uap1l1,Plod3,Selenon,Ddost,Insr,Pgd,Il1b,Ak1,Aldoa,Col6a1,Pkm,Gfpt1,Mmp12,Slc35c2,Acsl4,Gucy1a1,Gpi1,Cemip,Tet1,Dad1,Magt1,Itm2b,Sulf1,Cela1,Gamt,Abcc5,St3gal3,Chst12,Atp5mc1,Gcdh,Cd44,Gale,Gapdh,B4galt6,Hbegf,Mgat2,Far2,Lipa,Rpia,Papss2,Nudt7,G6pdx,Gda,Xdh,Eno3,Fbxo27,Gmpr,Pigyl,Acly,Chit1,Ndufa13,Fuca1,Nme3,St6…
CELL JUNCTION ASSEMBLY (GO: BP)	2.13653e-05	0.00189218	0.57561	-0.338025	-1.56214	431	Adgrl1,Adgrl2,L1cam,Actn1,Rhoc,Thy1,Actb,Cd9,Flot1,Col16a1,Prickle1,Actn4,Zfp703,Phldb2,Esam,Il1b,Cfl1,Lims1,Cav1,Fermt2,Ephb3,Tln1,Xlr4b,Itgb1,Dlg5,Zdhhc8,Cldn1,Rab13,Slit2,Nptxr,Cdh11,Clstn1,Gpm6a,Vldlr,Tns1,Fn1,Cldn10,Dlc1,Cdc42,Nptn,Mpp7,Snai1,Gnpat,Crtac1,Lhfpl4,App,Actr3,Farp1,Lrp1,Grem1,Cdh13,Itga5,Actn3,Adnp,Dusp3,Vstm5,Tesk2,Rac1,Gpc4,Fscn1,Tnf,F11r,Irx3,Nrp1,Cdh2,Lrfn3,Dbnl,Bcl2,Thbs2,N…
DENDRITE MORPHOGENESIS (GO: BP)	0.00138715	0.0409501	0.45506	-0.3756	-1.5661	174	Cux1,Cfl1,Map6,Tet1,Rbfox2,Ephb3,Dtnbp1,Ptn,Xlr4b,Fbxw8,Itgb1,Kidins220,Nedd4,Rere,Nfatc4,Sdc2,Vldlr,Cdc42,Actr3,Pak3,Farp1,Ilk,Hdac6,Rac1,Cul7,Nrp1,Dbnl,Mfn1,Cacna1f,Caprin2,Akap5,Igf2bp1,Arhgap44,Fzd4,Cask,Abi3bp,Ache,Dnm3,Mfn2,Trpc6,Slitrk5,Dact1,Kif1a,Obsl1,Cdk5,Klf7,Rab21,Slc30a1,Wasl,Tpbg,Ptprf,Dbn1,Camk2a
VESICLE MEDIATED TRANSPORT (GO: BP)	4.35578e-11	8.39033e-08	0.851339	-0.313488	-1.56879	1438	Ncam1,Sytl1,Cux1,Dnajc6,Eps15,Lgals3,Cyba,Tmed3,Spon2,Cd177,Rab44,Cd63,Fcer1g,Clu,Flna,Rac2,Ifitm3,Actb,Elane,Thbs1,Cnn2,Trappc2l,Rab3d,Cd9,Prtn3,Flot1,Arrb2,Fgr,Prickle1,Siglece,Rab34,Itgb2l,Rab20,Rap1b,Cd300lf,Gnai2,Ralb,Actn4,Chmp2a,Tyrobp,Insr,Ncf4,Anxa1,Stxbp2,Myh10,Itgb2,Vamp4,Mapk3,Sorl1,P2rx1,Copz2,Tmcc1,Cebpe,Snx3,Atp6v1e1,Anxa2,Sirt2,Gas1,Igf1r,Lilrb4b,Tex261,Anxa3,Septin5,Krt18,Coro1a,…
CARBOHYDRATE DERIVATIVE BIOSYNTHETIC PROCESS (GO: BP)	6.03837e-06	0.000664652	0.610527	-0.331198	-1.5708	561	Tk1,St3gal5,Chst13,Aprt,Tkt,Fut10,St6galnac6,Uap1l1,Plod3,Ddost,Insr,Il1b,Ak1,Aldoa,Gfpt1,Slc35c2,Acsl4,Gucy1a1,Tet1,Dad1,Magt1,Itm2b,Abcc5,St3gal3,Chst12,Atp5mc1,Gcdh,Gapdh,B4galt6,Hbegf,Mgat2,Lipa,Papss2,G6pdx,Gmpr,Pigyl,Acly,Ndufa13,Nme3,St6galnac4,Adcy3,Acsl6,Dpm1,Eno1,Galnt17,Adk,Pigp,Acot7,Tmem59,Rpn1,Chpf,Akr1a1,Ndufa8,Qng1,Atp5mg,Hexa,Pofut2,Ampd2,Sdha,Adss2,Pigu,Ndufb7,Ndufv3,Atp5f1e,Ndu…
PROTEIN LOCALIZATION TO CELL JUNCTION (GO: BP)	0.00107147	0.0345427	0.45506	-0.400086	-1.57789	124	Tjp3,Flna,Actb,Actn4,Hspb1,Fermt2,Lamtor2,Gabarap,Dlg5,Nptxr,Clstn1,Mpp7,Lhfpl4,Rab27b,Gpc4,F11r,Mapt,Sacm1l,Vcl,Jam3,Vps35,Arhgap44,Gpc6,Epb41l1,Stx4a,Dlg1,Olfm2,Mapk8ip3,Bsn,Nbea,Map1a,Vps26b,Actg1,Cdk5,Snap47,Vamp2,Rab4a,Rab11a
CELL JUNCTION ORGANIZATION (GO: BP)	8.22773e-08	2.34795e-05	0.704976	-0.328511	-1.58651	754	Adgrl1,Tjp3,Adgrl2,Cd177,L1cam,Actn1,Rhoc,Flna,Thy1,Actb,Cd9,Prtn3,Flot1,Col16a1,Dmpk,Prickle1,Palm,Sema3f,Rap1b,Lama5,Actn4,Slc7a11,Zfp703,Phldb2,Insr,Esam,Il1b,Cfl1,Myh10,Lamb2,Pfn1,Tgfb3,Igf1r,Synpo,Lims1,Tgfb2,Cav1,Wasf3,Fermt2,Ephb3,Palld,Lamtor2,Tln1,Dtnbp1,Ptn,Xlr4b,Itgb1,Dlg5,Zdhhc8,Prnp,Dctn1,Nedd4,Cldn1,Rab13,Slit2,Nptxr,Cdh11,Clstn1,Nfatc4,Get1,Gpm6a,Vldlr,Tns1,Pgrmc1,Fn1,Cldn10,Dlc1,P…
MUSCLE CELL PROLIFERATION (GO: BP)	0.000156401	0.00866958	0.518848	-0.3601	-1.58768	255	Ncam1,Cited2,Mmp9,Cyba,Spon2,Rbpj,Elane,Thbs1,Ccn4,Gnai2,Selenon,Snhg15,Igfbp3,Myh10,Timp3,Tpm1,Tgfb3,Igf1r,Tgfb2,Cav1,Ndrg2,Hbegf,Ogn,Efemp2,Mmp2,Bmp4,Ddr2,P2ry6,Id2,Ilk,Cdh13,Tenm4,Tafa5,Tnf,Cdkn1a,Pak1,Egfr,Phb1,Xrcc5,Tbx5,Skp2,Ndrg4,Itgb3,Nrg1,Ccn3,Nqo2,Fgf1,Flt1,Cnn1,Ifng,Comt,Gper1,Ptk2,Sugt1,Mfn2,Mdm2,Nol3,Itga2,Npr1,Notch3,Htr1b,Poldip2
HUMORAL IMMUNE RESPONSE (GO: BP)	0.00114372	0.0358226	0.45506	-0.379616	-1.5901	177	Ltf,Pglyrp1,Lgals3,Spon2,Rbpj,Camp,S100a9,Masp1,Elane,Wfdc21,Fcnb,Slpi,Il1b,Jchain,Ctsg,Ccl6,Fau,Igha,Gapdh,Romo1,Cxcl14,Ccl2,C1rl,Acod1,Cd81,App,Pf4,Cfp,Svep1,Cxcl15,Tnf,Rps19,H2-DMa,Phb1,Cfh,Fcgr2b
POSITIVE REGULATION OF ERK1 AND ERK2 CASCADE (GO: BP)	0.000973201	0.0320449	0.477271	-0.379797	-1.59295	178	Pde8a,Chi3l1,Inhba,Arrb2,Rap1b,Gnai2,Il1b,Ccn2,Mapk3,Pdgfa,Fgf18,Fermt2,Cd44,Tirap,Dnajc27,Cavin3,Card9,Acta2,Nptn,Bmp4,Ddr2,App,Lrp1,P2ry6,Fgfr3,Nrp1,Nod1,Egfr,Glipr2,Phb1,Ndrg4,Slc30a10,Dstyk,Tlr2,Itgb3,Nrg1,Nqo2,Fgf1,Ddr1,Myh9,Pdgfc,Gper1,P2ry1,C3,Trem2,Cxcl12,Pdgfra,Fgf10,Ednra,Gpnmb,Alox15,C5ar1,Atp6v0c,Serpinf2,Phb2,Vegfb,Spry2,Tpbg,Map2k1,Npnt,Npy,Ngf,Adcyap1,Slamf1,Csf1r
POSITIVE REGULATION OF TUMOR NECROSIS FACTOR SUPERFAMILY CYTOKINE PRODUCTION (GO: BP)	0.00129789	0.0386205	0.45506	-0.412433	-1.59516	112	Cyba,Spon2,Mmp8,Fcer1g,Cybb,Clu,Thbs1,Adam8,Tyrobp,Ccn1,Lpl,Hspb1,Tirap,Cd84,Ccl2,Nfatc4,Card9,Tnfrsf1a,App,Oas1c,Fadd,Nod1,Fcgr2b,Tlr2,Ptprj,Hspd1,Ifih1,Ifng,Lbp
REGULATION OF VESICLE MEDIATED TRANSPORT (GO: BP)	2.13309e-06	0.00030436	0.627257	-0.336993	-1.59661	544	Dnajc6,Lgals3,Cyba,Cd177,Cd63,Fcer1g,Clu,Rac2,Actb,Cnn2,Rab3d,Prtn3,Flot1,Arrb2,Fgr,Siglece,Itgb2l,Rap1b,Cd300lf,Gnai2,Actn4,Chmp2a,Insr,Anxa1,Stxbp2,Itgb2,Vamp4,Mapk3,Sorl1,P2rx1,Snx3,Anxa2,Sirt2,Gas1,Septin5,Coro1a,Rab27a,Ms4a2,Cav1,Clip3,Spi1,Tfr2,Dtnbp1,Pacsin3,Itgb1,Atp9a,Cbarp,Nedd4,Cd84,Unc13d,Ccl2,Hck,Fes,Scrn1,Rack1,Apoc1,Vamp8,Hgs,Wdr54,Cdc42,Ap2m1,Snapin,Dnm1,Atg7,Use1,App,Lamp1,Lrp1,C…
TAXIS (GO: BP)	3.765e-05	0.00299065	0.557332	-0.348587	-1.60289	388	Mmp9,S100a8,Lgals3,Ear2,Fcer1g,Rac2,S100a9,Thbs1,Arrb2,Trem3,Fpr2,Sema3f,Itgb2l,Retnlg,Adam8,Ccn1,Mcu,Gpsm3,Il1b,Anxa1,Itgb2,Mapk3,Ctsg,Pdgfa,Fpr1,Parva,Coro1a,Lsp1,Ccl6,Slit3,Hspb1,Fgf18,Spi1,Ptn,Rhog,Tirap,Hbegf,Slc8b1,Smoc2,Cxcl14,Megf8,Rab13,Ccl2,Slit2,Fes,Csf1,Mmp2,Fn1,Sema3c,Ccr6,App,Csf3r,Nrp2,Pf4,Lrp1,Trpm2,Grem1,Cdh13,Ear6,Sema4f,Dusp3,Bsg,Cxcl15,Cklf,Itgam,Lox,Rac1,Rps19,Nrp1,Ear1,Vegfc…
AXON DEVELOPMENT (GO: BP)	4.99116e-06	0.00058268	0.610527	-0.343814	-1.60293	479	Ncam1,L1cam,Unc5a,Enah,Flna,Thy1,Actb,Flot1,Prickle1,Sema3f,Lama5,Alcam,Myh10,Lamb2,Map6,Vasp,Gas1,Igf1r,Tgfb2,Matn2,Slit3,Arhgef25,Ephb3,Vim,Ndn,Ptn,Scarf1,B4galt6,Itgb1,Gdi1,Megf8,Rnd2,Mag,Slit2,Cdh11,Mmp2,Folr1,Fn1,Sema3c,Tnn,Plxnc1,Nexn,Ttl,Lhx1,Atg7,Crtac1,Crabp2,App,Actr3,Pak3,Nrp2,Lrp1,Pitpna,Ilk,Sema4f,Hdac6,Adnp,Fgfr3,Tiam2,Rac1,Grcc10,Nfix,Rpl4,Nrp1,Cdh2,Dbnl,Bcl2,Pak1,Dnm2,Nrn1,Unc5c,C…
GRANULOCYTE MIGRATION (GO: BP)	0.000578418	0.0214265	0.477271	-0.401217	-1.60703	141	S100a8,Lgals3,Cd177,Fcer1g,Rac2,S100a9,Thbs1,Prtn3,Trem3,Itgb2l,Adam8,Mcu,Il1b,Anxa1,Itgb2,Mapk3,Ccl6,Tirap,Myo1f,Ccl2,Slit2,Csf1,Cd99l2,Csf3r,Pf4,Bsg,Cxcl15,Cklf,Itgam,Rac1,Jam3,Spp1,Ppib,Pawr,Tlr2,Ptprj,Ifng,Ptk2,Lbp,Ccr3,Emp2,Mospd2
CONNECTIVE TISSUE DEVELOPMENT (GO: BP)	0.000107785	0.00686348	0.538434	-0.364081	-1.62002	278	Zmpste24,Ltbp3,Thbs1,Ccn4,Efemp1,Comp,Ccn1,Ccn2,Col6a1,Lpl,Mapk3,Cnmd,Sorl1,Pitx1,Prrx2,Sfrp2,Col5a1,Rspo2,Tgfb2,Sulf1,Fgf18,Spi1,Serpinh1,Lipa,Col10a1,Bmp1,Pgrmc2,Rflnb,Pth1r,Slc39a13,Ogn,Csf1,Bgn,Gnas,Mgp,Bmp4,Mboat2,Snai1,Esrra,Dgat2,Col1a1,Fto,Id2,Grem1,Creb3l2,Loxl2,Col3a1,Fgfr3,Lox,Prrx1,Prkg2,Fosl2,Pkd1,Ecm1,Cfh,Hspg2,Chst11,Nfib,Rxfp1,Scx,Col2a1,Itgb3,Ap1s2,Ubb,Ccn3,Bscl2,Rela,Ifng,Col9a1…
CELL CELL JUNCTION ORGANIZATION (GO: BP)	0.000431531	0.0173174	0.498493	-0.385832	-1.6207	182	Tjp3,Cd177,Rhoc,Flna,Actb,Cd9,Prtn3,Actn4,Zfp703,Esam,Il1b,Tgfb3,Lims1,Tgfb2,Cav1,Fermt2,Itgb1,Dlg5,Cldn1,Rab13,Cdh11,Cldn10,Cdc42,Mpp7,Snai1,Gnpat,Svep1,Cdh13,Rac1,Fscn1,Tnf,F11r,Irx3,Kirrel1,Cdh2,Nphp1,Vcl,Tbx5,Jam3,Ocel1,Ceacam1,Fbf1,Lims2,Cldn19,Ugt8a
TISSUE REMODELING (GO: BP)	0.000418674	0.0168894	0.498493	-0.385287	-1.62093	183	Mmp9,Rbpj,Rspo3,Flna,Rac2,Ltbp3,Rab3d,Adam8,Tpp1,Col6a1,Timp1,Cspg4,Adra1b,Tgfb2,Cav1,Tmbim1,Cela1,Capn1,Ptn,Lipa,Pth1r,Mmp2,Sema3c,Cthrc1,Ddr2,Tnfrsf11b,Sfrp1,Cst3,Lrp1,Grem1,Fgfr3,Wnt16,Rac1,Fosl2,Klf6,Egfr,Spp1,Dlk1,Ceacam1,Tfrc,P3h4,Gpr137b,Itgb3,Abi3bp,Slc4a2,Ahr,Npr2,Ncdn,Mdm2,Nol3,Rab7,Mmp14,Htr1b,Dll4,Fgf10,Ednra,Gpnmb
CELL MORPHOGENESIS INVOLVED IN NEURON DIFFERENTIATION (GO: BP)	4.80923e-07	0.000102931	0.659444	-0.342175	-1.62317	576	Ncam1,Cux1,L1cam,Unc5a,Enah,Thy1,Actb,Flot1,Spr,Prickle1,Sema3f,Lama5,Alcam,Cfl1,Myh10,Lamb2,Map6,Vasp,Gas1,Igf1r,Tgfb2,Tet1,Matn2,Slit3,Rbfox2,Arhgef25,Ephb3,Vim,Ndn,Dtnbp1,Ptn,B4galt6,Xlr4b,Fbxw8,Itgb1,Gdi1,Kidins220,Megf8,Nedd4,Rnd2,Mag,Rere,Slit2,Slc1a3,Cdh11,Nfatc4,Sdc2,Vldlr,Fn1,Sema3c,Tnn,Plxnc1,Cdc42,Nexn,Ttl,Lhx1,Atg7,Hexa,Crabp2,App,Actr3,Pak3,Nrp2,Farp1,Lrp1,Pitpna,Id2,Ilk,Sema4f,Hdac6…
MYELOID LEUKOCYTE MEDIATED IMMUNITY (GO: BP)	0.000832286	0.0288402	0.477271	-0.422143	-1.62664	110	Spon2,Cd177,Rab44,Fcer1g,Rac2,Elane,Trem3,Fgr,Itgb2l,Tyrobp,Stxbp2,Itgb2,Ctsg,Anxa3,Ms4a2,Spi1,Clnk,Cd300lb,Cd84,Myo1f,Unc13d,Fes,Vamp8,Card9,Ncf1,Ptgdr,Itgam
REGULATION OF WOUND HEALING (GO: BP)	0.00112993	0.0355352	0.45506	-0.42041	-1.62953	114	S100a9,Thbs1,Cd9,Ccn4,Phldb2,Anxa1,Plaur,Anxa2,Pdgfa,Cav1,Fermt2,Gp5,Hbegf,Itgb1,Smoc2,Anxa5,Cldn1,Ccl2,Ddr2,Vwf,Tafa5,Tnf,Serpine1,Plat,Enpp4,Ceacam1,Tmx1,Nfe2l2,Cldn19,Cask,Ptk2,Serpine2,Kank1,Tnfrsf12a,Myoz1,Pdgfra,Actg1,Serpinf2,Vegfb,Alox12
BONE DEVELOPMENT (GO: BP)	0.000248933	0.0116724	0.498493	-0.380133	-1.63205	211	Cited2,Ltf,Zmpste24,Trim45,Ltbp3,Thbs1,Ccn4,Comp,Tyrobp,Col6a1,Timp3,Pdgfa,Sulf1,Evc,Fgf18,Serpinh1,Lipa,Col10a1,Papss2,Megf8,Rflnb,Gpr68,Ogn,Rpl13,Ski,Bgn,Gnas,Tnn,Bmp4,Ddr2,Atp6ap1,Col1a1,Sparc,Insig2,Grem1,Actn3,Fbln5,Col3a1,Fgfr3,Lox,Fosl2,Nfix,Lrrc17,Ecm1,Cfh,Hspg2,Pitx2,P3h1,Ppib,Scx,Col2a1,Pls3,Pdgfc,Col9a1,Msx1,Npr2,Por
CARTILAGE DEVELOPMENT (GO: BP)	0.000255559	0.0117585	0.498493	-0.386445	-1.63408	196	Zmpste24,Ltbp3,Thbs1,Ccn4,Efemp1,Comp,Ccn1,Ccn2,Col6a1,Mapk3,Cnmd,Pitx1,Prrx2,Sfrp2,Rspo2,Tgfb2,Sulf1,Fgf18,Serpinh1,Col10a1,Bmp1,Rflnb,Pth1r,Ogn,Bgn,Gnas,Mgp,Bmp4,Mboat2,Snai1,Esrra,Col1a1,Grem1,Creb3l2,Loxl2,Col3a1,Fgfr3,Prrx1,Prkg2,Fosl2,Pkd1,Ecm1,Cfh,Hspg2,Chst11,Nfib,Scx,Col2a1,Ccn3,Rela,Col9a1,Msx1,Npr2,Por
ENDOCYTOSIS (GO: BP)	6.51592e-08	1.95425e-05	0.704976	-0.341733	-1.63738	661	Dnajc6,Eps15,Lgals3,Cyba,Spon2,Cd177,Cd63,Fcer1g,Clu,Ifitm3,Actb,Elane,Thbs1,Cnn2,Cd9,Prtn3,Flot1,Arrb2,Fgr,Siglece,Rab34,Rab20,Cd300lf,Ralb,Actn4,Tyrobp,Insr,Ncf4,Anxa1,Itgb2,Vamp4,Mapk3,Sorl1,Cebpe,Snx3,Anxa2,Sirt2,Lilrb4b,Anxa3,Coro1a,Rhou,Rab27a,Cav1,Clip3,Calm1,Xkr8,Tfr2,Dtnbp1,Cd44,Capn2,Pacsin3,Mycbpap,Itgb1,Lipa,Bin3,Atp9a,Nedd4,Myo1f,Unc13d,Pik3cb,Ccl2,Hck,Snx18,Rack1,Vldlr,Apoc1,Fnbp1l,…
RECEPTOR INTERNALIZATION (GO: BP)	0.000544164	0.0207564	0.477271	-0.409447	-1.63862	142	Eps15,Cd63,Fcer1g,Cd9,Flot1,Arrb2,Ralb,Insr,Itgb2,Sirt2,Lilrb4b,Cav1,Dtnbp1,Itgb1,Nedd4,Hgs,Wdr54,Ap2m1,Cd81,Dnm1,App,Lrp1,Grem1,Dnm2,Atad1,Akap5,Ceacam1,Tfrc,Itgb3,Nrg1,Usp46,Grb2,Ache,Dnm3,Ncdn,Ophn1,Lrpap1,Efnb2,Htr1b,Arf1,Cxcr2,Plk2,Synj2bp,Rin3,Lpar1
HEMOSTASIS (GO: BP)	0.000416618	0.0168894	0.498493	-0.397992	-1.64106	162	Fcer1g,Tspan9,Flna,S100a9,Thbs1,Cd9,Comp,Slc7a11,P2rx1,Ctsg,Plaur,Anxa2,Pdgfa,Pdpn,Rab27a,Cav1,Dtnbp1,Adamts13,Gp5,Papss2,Anxa5,Pik3cb,Anxa8,Pdia3,Gnas,Treml1,Entpd2,Fzd6,Svep1,F2rl2,Vwf,Nbeal2,F11r,Stxbp3,Serpine1,Plat,Enpp4,Cfh,Ceacam1,Ptprj,Itgb3,Tmx1,Plek,Nfe2l2,Ubash3a,Mertk,P2ry1,F2rl3,Serpine2
REGULATION OF RESPONSE TO WOUNDING (GO: BP)	0.00046443	0.0185411	0.498493	-0.402437	-1.64418	155	Flna,S100a9,Thbs1,Cd9,Ccn4,Phldb2,Anxa1,Plaur,Anxa2,Pdgfa,Igf1r,Cav1,Fermt2,Ptn,Scarf1,Gp5,Hbegf,Itgb1,Smoc2,Anxa5,Cldn1,Ccl2,Ddr2,Lrp1,Vwf,Tafa5,Tnf,Serpine1,Plat,Enpp4,Ceacam1,Tmx1,Nfe2l2,Nrg1,Cldn19,Cask,Ptk2,Serpine2,Neo1,Kank1,Tnfrsf12a,Ptpn6,Myoz1,Pdgfra,Actg1,Serpinf2,Mdk,Grn,Vegfb,Alox12
GOLGI VESICLE TRANSPORT (GO: BP)	5.19992e-05	0.00404701	0.557332	-0.369152	-1.64518	276	Cux1,Eps15,Tmed3,Trappc2l,Rab34,Vamp4,Sorl1,Copz2,Snx3,Gas1,Tex261,Krt18,Exoc1,Bcap31,Atp9a,Sec22c,Yif1b,Rab13,Rbsn,Rack1,Cope,P4hb,Use1,Lamp1,Ap3s1,Cln3,Golga7,Creb3l2,Arfgap3,Sec31a,Ccdc91,Exoc6b,Ccdc22,Copb2,Yipf6,Copg2,Tmed10,Dnm2,Kdelr3,Arf3,Scyl1,Sec16b,Kif1c,Tmed9,Kdelr2,Prepl,Mppe1,Trappc6a,Optn,Myo1b,Vti1a,Myo18a,Nrbp1,Lman2l,Arl3,Ergic3,Laptm5,Arf1,Trappc4,Nbea,Vti1b,Sgsm2,Tbc1d20,Ccdc9…
REGULATION OF ENDOCYTOSIS (GO: BP)	1.37447e-05	0.00137536	0.593325	-0.365362	-1.64607	314	Dnajc6,Lgals3,Cyba,Cd177,Cd63,Fcer1g,Clu,Actb,Cnn2,Prtn3,Flot1,Arrb2,Fgr,Siglece,Cd300lf,Actn4,Insr,Vamp4,Snx3,Anxa2,Sirt2,Rab27a,Cav1,Clip3,Tfr2,Dtnbp1,Pacsin3,Itgb1,Nedd4,Ccl2,Hck,Rack1,Apoc1,Vamp8,Wdr54,Cdc42,Ap2m1,Dnm1,Atg7,App,Lrp1,Cln3,Cfp,Grem1,Cdh13,Slc11a1,Rac1,Abca13,Dnm2,Serpine1,Atad1,Fcgr2b,Epn2,Akap5,Tsc2,Tlr2,Ptprj,Itgb3,Sod1,Nrg1,Vps28,Usp46,Mertk,Myh9,Ptx3,Ifng,B2m,Ptk2,Lbp,Ncdn,…
SKELETAL SYSTEM DEVELOPMENT (GO: BP)	9.24264e-07	0.000161851	0.659444	-0.350739	-1.64703	496	Cited2,Ltf,Mmp9,Lgals3,Tle5,Zmpste24,Trim45,Ltbp3,Thbs1,Hoxa7,Fgr,Ccn4,Efemp1,Lama5,Comp,Tyrobp,Ccn1,Ccn2,Col6a1,Timp3,Mapk3,Cnmd,Dync2i1,Pitx1,Tgfb3,Prrx2,Sfrp2,Pdgfa,Rspo2,Gas1,Tgfb2,Sulf1,Hoxa9,Evc,Fgf18,Serpinh1,Lipa,Col10a1,Papss2,Bmp1,Megf8,Rflnb,Pth1r,Hapln1,Gpr68,Ogn,Rpl13,Ski,Mmp2,Bgn,Gnas,Tnn,Etl4,Irx5,Mgp,Bmp4,Mboat2,Hoxc8,Snai1,Ddr2,Lhx1,Atp6ap1,Hexa,Col1a2,Esrra,Col1a1,Sparc,Sfrp1,In…
REGENERATION (GO: BP)	0.000188584	0.009676	0.518848	-0.416753	-1.68039	146	Flna,Thy1,Cd9,Selenon,Snhg15,Anxa1,Lamb2,Col6a1,Pkm,Igf1r,Matn2,Ptn,Scarf1,Bin3,Mag,Mmp2,Folr1,Cd81,Lrp1,Prrx1,Nfix,Cdkn1a,Gpx1,Bcl2,Egfr,Serpine1,Nfib,Bex1,Upf2,Nrg1,Ccn3,Gap43,Neo1,Mapk8ip3,Igsf10,Cxcl12,Sulf2,Myoz1,Naca,Nrep,Klf5,Gnat2,Mdk,Grn,Jak2,Capn3,Ninj1,Gja1,Ptprf,Map2k1,Dusp10
MYELOID LEUKOCYTE MIGRATION (GO: BP)	8.93807e-05	0.00620431	0.538434	-0.393501	-1.694	216	Mmp9,S100a8,Lgals3,Cd177,Fcer1g,Rac2,S100a9,Thbs1,Cnn2,Cd9,Prtn3,Trem3,Itgb2l,Retnlg,Adam8,Mcu,Il1b,Anxa1,Itgb2,Mapk3,Ctsg,Ccl6,Spi1,Tirap,Myo1f,Ccl2,Slit2,Csf1,Cd99l2,Mmp2,Cd81,App,Csf3r,Pf4,Grem1,Bsg,Cxcl15,Cklf,Itgam,Rac1,Rps19,Vegfc,Serpine1,Emilin1,Jam3,Spp1,Ppib,Pawr,Tlr2,Ptprj,Ccn3,Flt1,Ifng,Ptk2,Lbp,Ccr3,Emp2,Mospd2,B4galt1,Mmp14,Trem2,Cxcl12,Cxcr2,Ednra,C5ar1,P2rx4,Rin3,Mdk,Cxadr,Vegfb,P…
SUPEROXIDE METABOLIC PROCESS (GO: BP)	0.00174065	0.0480705	0.45506	-0.477578	-1.69772	69	Cyba,Cd177,Cybb,Fpr2,Itgb2l,Gnai2,Tyrobp,Ncf4,Itgb2,Sod3,Mpo,Cyb5r4,App,Ncf1,Fbln5,Itgam,Egfr,Mapt,Nqo1,Sod1,Nfe2l2
CELL MATRIX ADHESION (GO: BP)	2.67041e-05	0.00221242	0.57561	-0.393117	-1.69777	218	L1cam,Cd63,Actn1,Adam15,Zyx,Thy1,Thbs1,Hoxa7,Itga2b,Col16a1,Itgb2l,Adam8,Postn,Phldb2,Cfl1,Itgb2,Ccn2,Anxa2,Mmp12,Lims1,Sned1,Fermt2,Gp5,Itgb1,Pik3cb,Cdh11,Csf1,Efemp2,Rras,Fn1,Tnn,Dlc1,Lrp1,Itga11,Ilk,Grem1,Cdh13,Itga5,Actn3,Dusp3,Col3a1,Itgam,Tesk2,Rac1,Nrp1,Bcl2,Serpine1,Nid2,Emilin1,Vcl,Jam3,Itga7,Ptprj,Itgb3,Ddr1,Myh9,Cask,Efna5,Ptk2,Emp2,Rhod,Itga2,Mmp14,Poldip2,Dapk3,Whamm,Actg1,Adam9,Cdk5…
PROTEIN LOCALIZATION TO PHOTORECEPTOR OUTER SEGMENT (GO: BP)	0.00102159	0.0332157	0.45506	-0.913078	-1.70316	5	Rom1,Zdhhc3
REGULATION OF CELL SUBSTRATE ADHESION (GO: BP)	3.26689e-05	0.00264962	0.557332	-0.400093	-1.70733	209	L1cam,Adam15,Flna,Rac2,Thy1,Thbs1,Hoxa7,Col16a1,Actn4,Ccn1,Postn,Phldb2,Cfl1,Mmp12,Pdpn,Lims1,Arpc2,Fermt2,Ptn,Ndnf,Col8a1,Itgb1,Smoc2,Olfm4,Unc13d,Pik3cb,Csf1,Efemp2,Rras,Fn1,Dlc1,P4hb,Cdc42,Myadm,Col1a1,Fbln2,Lrp1,Ilk,Grem1,Cdh13,Itga5,Dusp3,Rac1,Nrp1,Bcl2,Dnm2,Serpine1,Emilin1,Vcl,Spp1,Ccdc80,Ptprj,Itgb3,Fzd4,Lims2,Ddr1,Myh9,Cask,Abi3bp,Efna5,Ptk2,Cass4,Emp2,Spock2,Rhod,Kank1,Mmp14,Poldip2,Dap…
NEURON GLIAL CELL SIGNALING (GO: BP)	0.000838443	0.0288402	0.477271	-0.916535	-1.70961	5	Adra1b
PERIPHERAL NERVOUS SYSTEM DEVELOPMENT (GO: BP)	0.00126553	0.0380537	0.45506	-0.474692	-1.7157	77	Cited2,Lamb2,Col6a1,Mapk3,Sirt2,Cldn1,Osm,Ski,Gpc1,Ilk,Plxna4,Sod1,Nrg1,Bag1,Hoxd9,Grb2,Rela,Sh3tc2,Cdk5,Plec,Sos1,Nab2,Map2k1,Pou3f1,Erbb3,Ngf,Lgi4
EPITHELIAL TO MESENCHYMAL TRANSITION (GO: BP)	0.000121731	0.00735942	0.538434	-0.420405	-1.72174	158	Ncam1,Rbpj,Adam15,Flna,Adam8,Zfp703,Phldb2,Il1b,Tgfb3,Sfrp2,Lrg1,Pdpn,Tgfb2,Fermt2,Dlg5,Rflnb,Tgfb1i1,Loxl3,Bmp4,Snai1,Pofut2,Col1a1,Sfrp1,Grem1,Loxl2,Slc39a6,Wnt16,Wwtr1,Cul7,Glipr2,Pawr,Kbtbd8,Tsc2
POSITIVE REGULATION OF CELL JUNCTION ASSEMBLY (GO: BP)	0.000158543	0.00868489	0.518848	-0.44883	-1.72735	111	Adgrl1,Adgrl2,Thy1,Flot1,Col16a1,Cfl1,Lims1,Cav1,Fermt2,Ephb3,Xlr4b,Dlg5,Cldn1,Slit2,Clstn1,Actr3,Adnp,Vstm5,Rac1,Irx3,Nrp1,Thbs2,Nphp1,Tbx5,Sema4a,Lrrtm3,Ptprj,Cldn19,Myh9,Efna5,Flrt2,Poldip2,Slitrk5,Amigo2
NEURON PROJECTION GUIDANCE (GO: BP)	2.1819e-05	0.0019104	0.57561	-0.406511	-1.72967	201	Ncam1,L1cam,Unc5a,Enah,Flot1,Sema3f,Lama5,Alcam,Myh10,Lamb2,Vasp,Gas1,Tgfb2,Matn2,Slit3,Arhgef25,Ephb3,Megf8,Slit2,Sema3c,Nexn,Lhx1,App,Nrp2,Lrp1,Sema4f,Rac1,Nrp1,Unc5c,Hspg2,Ntn4,Nfib,Sema4a,Smo,Efna3,Unc5b,Plxna4,Lmo4,Ephb6,Efna5,Flrt2,Usp33,Gap43,Boc,Neo1,Mapk8ip3,Efnb2,Apbb2,Notch3,Lamb3,Cxcl12,Crppa,Lamb1,Ntn3,Ednra,Lama1,Sema4g,Cdk5,Sema3b,Klf7,Gata3,Mycbp2,Chn1,Robo2,Megf9,Tubb3
PLATELET ACTIVATION (GO: BP)	0.000362111	0.0150814	0.498493	-0.463108	-1.73212	90	Fcer1g,Tspan9,Flna,Cd9,Comp,Slc7a11,P2rx1,Ctsg,Pdgfa,Pdpn,Gp5,Pik3cb,Pdia3,Gnas,Treml1,Entpd2,Fzd6,Svep1,Vwf,F11r,Stxbp3,Cfh,Ceacam1,Ptprj,Itgb3,Tmx1,Plek,Ubash3a,Mertk,P2ry1,F2rl3,Serpine2
DEFENSE RESPONSE TO GRAM NEGATIVE BACTERIUM (GO: BP)	0.00142796	0.0415185	0.45506	-0.497742	-1.73256	61	Ltf,Lyz2,Camp,Elane,Trem3,Ctsg,Romo1,Gsdmd,App,Ssc5d,Slc11a1,Rps19,Nod1,Serpine1,B2m,Optn,Lbp,Naip5,Trem2,Irgm1,Dao
MEMBRANE INVAGINATION (GO: BP)	0.00137886	0.0408619	0.45506	-0.486441	-1.74352	71	Fcer1g,Thbs1,Siglece,Chmp2a,Itgb2,Snx3,Xkr8,Snx18,Fnbp1l,Hgs,Cdc42,Itgam,Rac1,Timd4,Gulp1,Fcgr2b,Sh3bp1,Bin2,Myh9,Lbp,Itga2,C3,Xkr5,Trem2,Arf1,Alox15,Treml4,Msr1,Wasl,Alkbh4,Rhoa,Clec7a
PHAGOCYTOSIS (GO: BP)	3.69559e-05	0.0029661	0.557332	-0.407277	-1.74579	210	Cyba,Spon2,Fcer1g,Elane,Thbs1,Cnn2,Prtn3,Fgr,Siglece,Rab34,Rab20,Cd300lf,Tyrobp,Ncf4,Anxa1,Itgb2,Cebpe,Snx3,Anxa3,Coro1a,Rab27a,Xkr8,Itgb1,Unc13d,Ccl2,Hck,Rack1,Cdc42,Anxa11,Colec12,Atg7,Lrp1,P2ry6,Cln3,Cfp,Slc11a1,Itgam,Rac1,Nfix,Timd4,Arl8b,Mesd,Dnm2,Gulp1,Fcgr2b,Sh3bp1,Tlr2,Ptprj,Itgb3,Sod1,Bin2,Mertk,Myh9,Ptx3,Ifng,Ptk2,Lbp,Myo18a,Rab7,Itga2,Pip4p2,C3,Xkr5,Trem2,Appl1,Ticam2,Alox15,Treml4,Atg…
POSITIVE REGULATION OF CELL SUBSTRATE ADHESION (GO: BP)	0.000103343	0.00674795	0.538434	-0.439341	-1.74644	128	L1cam,Flna,Thy1,Thbs1,Col16a1,Ccn1,Cfl1,Lims1,Arpc2,Fermt2,Ptn,Ndnf,Col8a1,Itgb1,Smoc2,Olfm4,Unc13d,Csf1,Efemp2,Rras,Fn1,P4hb,Cdc42,Myadm,Fbln2,Ilk,Cdh13,Itga5,Rac1,Nrp1,Dnm2,Emilin1,Spp1,Ccdc80,Ptprj,Itgb3,Lims2,Myh9,Abi3bp,Cass4,Emp2,Spock2,Poldip2,Alox15,Mdk,Nid1,Has2,Jak2,Ninj1,Calr,Rin2,Dbn1,Cspg5,Npnt,Npy,Hacd1,Fbln1,Disc1
PROTON MOTIVE FORCE DRIVEN ATP SYNTHESIS (GO: BP)	0.000902418	0.0302342	0.477271	-0.503293	-1.75201	60	Atp5mc1,Ndufa13,Ndufa8,Atp5mg,Sdha,Ndufb7,Ndufv3,Atp5f1e,Ndufb8,Ndufb6,Ndufs1,Sdhc,Ndufb3,Atp5f1c,Atp5pb,Ndufs7,Ndufb9,Ndufb10,Atp5f1d,Ndufa5,Ndufc2,Ndufa1,Atp5pf,Ndufs4,Ndufs6,Atp5f1b,Ndufa7,Stoml2,Atp5po,Ndufb11
CELL RECOGNITION (GO: BP)	0.000165054	0.00889327	0.518848	-0.44172	-1.75596	126	Ncam1,Lgals3,Spon2,L1cam,Cd9,St6galnac6,Aldoa,Ephb3,Ndn,Zan,Megf8,Vdac2,Folr1,Tnn,Nexn,Cd81,Colec12,Crtac1,App,Cfp,Nrp1,Folr2,Ptx3,Gap43,Dlg1,Myo18a,Pcsk4,B4galt1,Tcp1,Trem2
REGULATION OF VESICLE DOCKING (GO: BP)	0.000186048	0.00965583	0.518848	-0.944645	-1.76204	5	Ncam1,Ralb,Septin5
AXON REGENERATION (GO: BP)	0.00142355	0.0415185	0.45506	-0.521447	-1.76735	51	Flna,Lamb2,Igf1r,Ptn,Scarf1,Mag,Mmp2,Folr1,Lrp1,Bcl2,Bex1,Nrg1,Gap43,Neo1,Mapk8ip3,Nrep,Grn,Jak2,Ptprf,Map2k1
VESICLE DOCKING (GO: BP)	0.000734399	0.0264418	0.477271	-0.521258	-1.77383	54	Ncam1,Ralb,Stxbp2,Septin5,Exoc1,Stx8,Sytl2,Cln3,Exoc6b,Syde1,Stxbp3,Stx2,Ndrg4,Plek,Stx4a
MESENCHYME DEVELOPMENT (GO: BP)	8.22214e-07	0.000147329	0.659444	-0.398186	-1.77672	279	Ncam1,Cited2,Rbpj,Adam15,Flna,Thbs1,Prickle1,Sema3f,Lama5,Adam8,Zfp703,Phldb2,Il1b,Cfl1,Timp3,Mapk3,Tgfb3,Sfrp2,Plaur,Lrg1,Pdpn,Tgfb2,Fermt2,Dlg5,Nedd4,Rflnb,Tgfb1i1,Loxl3,Folr1,Fn1,Sema3c,Cdc42,Bmp4,Snai1,Pofut2,Col1a1,Sfrp1,Nrp2,Nckap1,Grem1,Loxl2,Sema4f,Slc39a6,Wnt16,Wwtr1,Cul7,Nrp1,Cdh2,Bcl2,Glipr2,Pitx2,Tbx5,Sema4a,Tead1,Smo,Pawr,Kbtbd8,Tsc2,Scx,Poglut1,Msx1,Ptk2,Mdm2,Emp2,Phactr4,Notch4,Meo…
LEUKOCYTE DEGRANULATION (GO: BP)	0.000392983	0.0161922	0.498493	-0.489828	-1.77851	78	Cd177,Rab44,Fcer1g,Rac2,Fgr,Itgb2l,Stxbp2,Itgb2,Anxa3,Coro1a,Rab27a,Ms4a2,Spi1,Clnk,Nkg7,Cd84,Myo1f,Unc13d,Fes,Vamp8,Lamp1,Ptgdr,Itgam
WOUND HEALING (GO: BP)	2.51268e-07	5.99395e-05	0.674963	-0.39136	-1.77908	338	Fcer1g,Tspan9,Flna,S100a9,Thbs1,Cnn2,Cd9,Ccn4,Comp,Slc7a11,Chmp2a,Ccn1,Phldb2,Anxa1,Myh10,Tpm1,P2rx1,Timp1,Ctsg,Col5a1,Plaur,Fkbp10,Lrg1,Anxa2,Mmp12,Pdgfa,Pdpn,Rab27a,Cav1,Fermt2,Dtnbp1,Cd44,Ndnf,Adamts13,Ahnak,Gp5,Hbegf,Itgb1,Smoc2,Papss2,Anxa5,Cldn1,Pik3cb,Ccl2,Anxa8,Tmeff2,Pdia3,Gnas,Fn1,Treml1,Ddr2,Entpd2,Fzd6,Svep1,Slc11a1,F2rl2,Vwf,Col3a1,Nbeal2,Tafa5,Tnf,F11r,Cdkn1a,Gpx1,Nrp1,Arl8b,Stxbp3,…
PLASMA MEMBRANE RAFT ORGANIZATION (GO: BP)	0.0012319	0.0376492	0.45506	-0.781766	-1.7845	10	Flot1,Col6a1,Cav1,Colec12,Cln3,Emp2
LYTIC VACUOLE ORGANIZATION (GO: BP)	0.000185241	0.00965583	0.518848	-0.471053	-1.78962	97	Rab34,Rab20,Chmp2a,Tpp1,Gaa,Coro1a,Lipa,Snapin,Hexa,Atp6ap2,Mfsd8,Aktip,Fhip1b,Lamp1,Cln6,Cln3,Hexb,Laptm4b,Lamp2,Arl8b,Tpcn2,Hook2,Vps35,Gba1,Chmp1a,Chmp3,Rab7,Chmp4c,Laptm5,Arf1,Irgm1,Lamtor1,Acp2,Atp6v0c,Grn,Chmp6,Fnip1,Ppp3cb
REGULATION OF DOPAMINERGIC NEURON DIFFERENTIATION (GO: BP)	0.000577676	0.0214265	0.477271	-0.873495	-1.80077	7	Sfrp2,Sfrp1,Id2
EMBRYO IMPLANTATION (GO: BP)	0.000407635	0.0166683	0.498493	-0.530994	-1.80783	52	Mmp9,Arhgdib,Il11ra1,Timp1,Mmp12,Reck,Exoc1,H3f3b,Acod1,Mmp2,Tead4,Syde1,Stx2,Fkbp4,Itgb3,Sod1,Ddr1,Fbn2,Emp2,Lamb1,Grn,Calr,Polr1b,Mst1,Trim28,Ptgis,Ube2q1,C1qbp
EPIBOLY (GO: BP)	0.00153099	0.0436898	0.45506	-0.586432	-1.80885	33	Flna,Ccn1,Phldb2,Col5a1,Lrg1,Mmp12,Pdpn,Fermt2,Cd44,Hbegf,Megf8,Tmeff2
RESPONSE TO WOUNDING (GO: BP)	8.27898e-10	7.43442e-07	0.801216	-0.390914	-1.81586	463	Fcer1g,Tspan9,Flna,S100a9,Thbs1,Cnn2,Cd9,Ccn4,Comp,Slc7a11,Chmp2a,Tyrobp,Snhg15,Ccn1,Phldb2,Anxa1,Myh10,Lamb2,Col6a1,Tpm1,P2rx1,Timp1,Ctsg,Col5a1,Plaur,Fkbp10,Lrg1,Anxa2,Mmp12,Pdgfa,Pdpn,Igf1r,Rab27a,Cav1,Matn2,Fermt2,Pvt1,Dtnbp1,Cd44,Ptn,Ndnf,Scarf1,Adamts13,Ahnak,Gp5,Hbegf,Itgb1,Smoc2,Papss2,Anxa5,Mag,Cldn1,Pik3cb,Ccl2,Slc1a3,Anxa8,Tmeff2,Lcp1,Mmp2,Folr1,Pdia3,Gnas,Fn1,Treml1,Neat1,Ddr2,Entpd2,…
HOMOTYPIC CELL CELL ADHESION (GO: BP)	0.00030213	0.0132268	0.498493	-0.501391	-1.8196	81	Ncam1,L1cam,Tspan9,Cd9,Comp,Slc7a11,Zfp703,Ctsg,Plaur,Pdpn,Pdia3,Gnas,F11r,Stxbp3,Cfh,Ceacam1,Itgb3,Tmx1,Plek,Ubash3a,F2rl3,Serpine2,Ptpn6,Pdgfra,Gp6,Cxadr,Alox12,Jak2
REGULATION OF METALLOPEPTIDASE ACTIVITY (GO: BP)	0.00147131	0.0424585	0.45506	-0.766847	-1.82096	12	Timp2,Timp3,Timp1,Reck,Antxr1,Svbp
ANTIMICROBIAL HUMORAL RESPONSE (GO: BP)	6.98092e-05	0.00512266	0.538434	-0.47595	-1.82279	104	Ltf,Pglyrp1,Lgals3,Spon2,Camp,S100a9,Elane,Wfdc21,Slpi,Jchain,Ctsg,Ccl6,Fau,Igha,Gapdh,Romo1,Cxcl14,Ccl2,Acod1,App,Pf4,Cxcl15,Rps19
COLLAGEN CATABOLIC PROCESS (GO: BP)	0.000744103	0.0266666	0.477271	-0.576932	-1.82296	36	Mmp9,Mmp8,Adam15,Prtn3,Vsir,Mmp12,Mmp25,Mmp23,Mmp19,Itgb1,Mmp2,Mrc2,Cst3
AMINOGLYCAN CATABOLIC PROCESS (GO: BP)	0.00168229	0.0472784	0.45506	-0.596828	-1.82855	31	Chil3,Chi3l1,Pglyrp1,Cemip,Cd44,Chit1,Galns,Hexa,Hexb,Stab2,Chil5,Pglyrp4,Cemip2,Hyal2,Ids,Idua,Slc9a1
POSITIVE REGULATION OF REACTIVE OXYGEN SPECIES METABOLIC PROCESS (GO: BP)	8.86786e-05	0.00620431	0.538434	-0.504164	-1.83512	79	Lcn2,Cyba,Cd177,Thbs1,Fpr2,Itgb2l,Gnai2,Tyrobp,Itgb2,Rab27a,Eif5a,Romo1,Xdh,Acod1,Cyp1b1,App,Itgam,Cdkn1a,Tspo,Egfr,Mapt,Sod1,Nfe2l2,Nqo2,Grb2,Mfn2,Duoxa1,Gadd45a,Hdac4
RESPONSE TO AXON INJURY (GO: BP)	0.000247381	0.0116724	0.498493	-0.51867	-1.83928	68	Flna,Tyrobp,Lamb2,Igf1r,Matn2,Ptn,Scarf1,Mag,Mmp2,Folr1,Lrp1,Fgfr3,Bcl2,Morn4,Bex1,Sod1,Nrg1,Gap43,Neo1,Mapk8ip3,Trem2,P2rx4,Nrep,Grn,Jak2,Ptprf,Map2k1
MESENCHYMAL CELL DIFFERENTIATION (GO: BP)	7.39124e-07	0.000135594	0.659444	-0.42422	-1.84031	231	Ncam1,Cited2,Rbpj,Adam15,Flna,Sema3f,Lama5,Adam8,Zfp703,Phldb2,Il1b,Cfl1,Timp3,Mapk3,Tgfb3,Sfrp2,Plaur,Lrg1,Pdpn,Tgfb2,Fermt2,Dlg5,Rflnb,Tgfb1i1,Loxl3,Folr1,Fn1,Sema3c,Cdc42,Bmp4,Snai1,Pofut2,Col1a1,Sfrp1,Nrp2,Grem1,Loxl2,Sema4f,Slc39a6,Wnt16,Wwtr1,Cul7,Nrp1,Cdh2,Bcl2,Glipr2,Pitx2,Sema4a,Smo,Pawr,Kbtbd8,Tsc2
POSITIVE REGULATION OF LEUKOCYTE DEGRANULATION (GO: BP)	0.00152207	0.0435968	0.45506	-0.600743	-1.84054	31	Cd177,Fcer1g,Fgr,Itgb2l,Stxbp2,Itgb2,Ms4a2,Vamp8,Lamp1,Itgam
NEURON PROJECTION MAINTENANCE (GO: BP)	0.00116731	0.0362467	0.45506	-0.795187	-1.85057	11	Insr,Prnp,Dctn1,Abcd2,App,Map1a,Atp1a3
RESPONSE TO UV A (GO: BP)	0.000342297	0.0144912	0.498493	-0.813177	-1.85621	10	Mmp9,Timp1,Mmp2,Egfr,Mme,Opn3
INTEGRIN BIOSYNTHETIC PROCESS (GO: BP)	6.12044e-05	0.00457845	0.538434	-0.944768	-1.86069	6	S100a9,Col5a1,Tgfb2,Tmeff2
REGULATION OF COLLAGEN METABOLIC PROCESS (GO: BP)	0.00049326	0.0192922	0.477271	-0.54785	-1.87114	56	Inhba,Prdx5,Arrb2,Vsir,Ccn2,Tgfb3,Vim,Itgb1,Creb3l1,Ccl2,Ltbp1,Fn1,Bmp4,Ddr2,Cst3,Fgfr3,Serpine1,Emilin1,Scx
GLYCOLYTIC PROCESS THROUGH GLUCOSE 6 PHOSPHATE (GO: BP)	0.000731063	0.0264418	0.477271	-0.690179	-1.8726	20	Foxk1,Aldoa,Pkm,Gpi1,Gale,Gapdh,Eno3,Eno1,Hk1,Tpi1
KILLING BY HOST OF SYMBIONT CELLS (GO: BP)	0.000713553	0.0259336	0.477271	-0.691193	-1.87535	20	Ltf,Camp,Elane,Trem3,Ctsg,Gapdh,Romo1,Ncf1
COMMISSURAL NEURON AXON GUIDANCE (GO: BP)	0.000865402	0.0296352	0.477271	-0.767906	-1.87752	13	Ncam1,Nrp1,Nfib,Smo
CELL SUBSTRATE ADHESION (GO: BP)	9.56051e-09	6.10282e-06	0.74774	-0.414554	-1.88451	338	L1cam,Cd63,Actn1,Adam15,Flna,Rac2,Zyx,Thy1,Thbs1,Hoxa7,Itga2b,Col16a1,Itgb2l,Lama5,Adam8,Actn4,Ccn1,Postn,Phldb2,Cfl1,Lamb2,Itgb2,Ccn2,Anxa2,Mmp12,Pdpn,Parva,Lims1,Sned1,Arpc2,Coro1a,Fermt2,Ephb3,Ptn,Ndnf,Col8a1,Gp5,Itgb1,Smoc2,Olfm4,Unc13d,Pik3cb,Cdh11,Csf1,Efemp2,Rras,Fn1,Tnn,Dlc1,P4hb,Cdc42,Myadm,Col1a1,Fbln2,Sfrp1,Lrp1,Itga11,Ilk,Grem1,Cdh13,Itga5,Actn3,Vwf,Dusp3,Col3a1,Itgam,Tesk2,Rac1,Antxr…
LEUKOCYTE MIGRATION INVOLVED IN INFLAMMATORY RESPONSE (GO: BP)	0.000408866	0.0166683	0.498493	-0.670764	-1.8927	24	S100a8,S100a9,Elane,Itgb2l,Adam8,Itgb2,Ptn,Ccl2,Ccr6,Itgam,Jam3,Ffar2,Lbp
RESPIRATORY BURST (GO: BP)	0.00142323	0.0415185	0.45506	-0.627391	-1.89378	29	Cyba,Cybb,Rac2,S100a9,Insr,Ncf4,Jchain,Lipa,Mpo,Ncf1,Slc11a1,Rac1,Rps19
POSITIVE REGULATION OF INTEGRIN MEDIATED SIGNALING PATHWAY (GO: BP)	0.000833591	0.0288402	0.477271	-0.76266	-1.90632	14	Cd63,Flna,Lamb2,Lims1,Loxl3,Lims2,Emp2,Lamb1,Lama1,Nid1,Lama2
POSITIVE REGULATION OF COLLAGEN METABOLIC PROCESS (GO: BP)	0.00025631	0.0117585	0.498493	-0.603604	-1.90723	36	Inhba,Prdx5,Arrb2,Vsir,Ccn2,Tgfb3,Vim,Creb3l1,Ccl2,Ltbp1,Bmp4,Ddr2,Serpine1,Scx,Itga2,Larp6,Serpinf2
NEURON RECOGNITION (GO: BP)	0.000176639	0.00936944	0.518848	-0.573883	-1.91218	45	Ncam1,L1cam,Ephb3,Ndn,Megf8,Tnn,Nexn,Crtac1,App,Nrp1
NEGATIVE REGULATION OF MEMBRANE PROTEIN ECTODOMAIN PROTEOLYSIS (GO: BP)	1.78741e-05	0.00166377	0.57561	-0.933431	-1.92434	7	Timp2,Timp3,Timp1,Ptpn3
COLLAGEN FIBRIL ORGANIZATION (GO: BP)	7.66631e-05	0.00552046	0.538434	-0.549535	-1.92924	64	Comp,Plod3,Selenon,Col6a1,Sfrp2,Col5a1,Fkbp10,Anxa2,Tgfb2,Col14a1,Serpinh1,Loxl3,Efemp2,Aebp1,Cyp1b1,Ddr2,Col1a2,Loxl1,Col1a1,Grem1,Loxl2,Col5a2,Col3a1,Lox,Emilin1,P3h1,P3h4,Scx,Col2a1,Dpt,Serpinf2,Col28a1,Crtap,Pxdn,Chadl,Optc,Col11a1
ANTIBACTERIAL HUMORAL RESPONSE (GO: BP)	0.000122456	0.00735942	0.518848	-0.580728	-1.93499	45	Ltf,Spon2,Camp,Elane,Wfdc21,Slpi,Jchain,Ctsg,Fau,Igha
SUPEROXIDE ANION GENERATION (GO: BP)	0.000488117	0.0191885	0.498493	-0.584947	-1.9434	44	Cyba,Cd177,Cybb,Fpr2,Itgb2l,Gnai2,Tyrobp,Ncf4,Itgb2,App,Ncf1,Itgam,Egfr,Mapt,Sod1,Prg3
INTEGRIN MEDIATED SIGNALING PATHWAY (GO: BP)	8.29004e-06	0.000874997	0.593325	-0.509767	-1.94972	102	Cd177,Cd63,Fcer1g,Adam15,Flna,Zyx,Thy1,Itga2b,Fgr,Itgb2l,Lama5,Tyrobp,Lamb2,Itgb2,Ccn2,Timp1,Lims1,Fermt2,Tln1,Ptn,Itgb1,Loxl3,Fn1,Cdc42,Itga11,Ilk,Itga5,Col3a1,Itgam,Nrp1,Itga7,Itgb3,Plek,Lims2,Ptk2,Emp2,Phactr4,Itga2,Lamb1,Lama1,Pram1,Slc2a10,Pxn,Nid1,Itgb5,Itgal,Itga1,Rhoa
VESICLE DOCKING INVOLVED IN EXOCYTOSIS (GO: BP)	0.000118806	0.00733034	0.538434	-0.619229	-1.95661	36	Ncam1,Ralb,Stxbp2,Septin5,Exoc1,Sytl2,Exoc6b,Syde1,Stxbp3,Plek,Stx4a
AXONAL FASCICULATION (GO: BP)	0.000219504	0.0107043	0.518848	-0.697441	-1.96311	23	Ncam1,L1cam,Ephb3,Ndn,Megf8,Crtac1,Nrp1
COLLAGEN BIOSYNTHETIC PROCESS (GO: BP)	2.34106e-05	0.00198856	0.57561	-0.581069	-1.98603	57	Inhba,Prdx5,Arrb2,Ccn2,Tgfb3,Col5a1,Vim,Serpinh1,Creb3l1,Ccl2,Ltbp1,Fn1,Bmp4,Ddr2,Col1a1,Fosl2,P3h3,Serpine1,Emilin1,P3h4,Scx,Itga2,Rcn3,Larp6,Serpinf2
EXTRACELLULAR STRUCTURE ORGANIZATION (GO: BP)	1.57857e-10	2.02715e-07	0.826657	-0.460764	-2.06354	289	Mmp9,Lgals3,Mmp8,Flot1,Col16a1,Prickle1,Comp,Plod3,Selenon,Ccn1,Postn,Phldb2,Lamb2,Ccn2,Col6a1,Ctsg,Sfrp2,Col5a1,Fkbp10,Anxa2,Mmp12,Mmp25,Pdpn,Reck,Angptl7,Tgfb2,Cav1,Matn2,Sulf1,Col14a1,Ndnf,Serpinh1,Col8a1,Mmp23,Adamts13,Mmp19,Itgb1,Creb3l1,Smoc2,Col10a1,Col4a2,Loxl3,Efemp2,Aebp1,Lcp1,Mmp2,Fn1,Cyp1b1,Ddr2,Col4a1,Tnfrsf1a,Col1a2,Loxl1,Spint2,App,Kazald1,Col1a1,Tnfrsf11b,Cst3,Prdm5,Grem1,Crispld2…
CYTOPLASMIC TRANSLATION (GO: BP)	1.14637e-08	6.10282e-06	0.74774	-0.513978	-2.08519	149	Eif4ebp1,Pkm,Rpl8,Rpsa,Rps2,Fau,Rps15,Rpl12,Rps5,Rplp1,Rplp0,Rpl28,Rps3,Rps12,Rpl18a,Rpl7a,Rps8,Rpl13,Rps18,Rplp2,Rps9,Eif2b3,Rps17,Rps26,Rpl3,Rps13,Rps16,Rpl17,Rpl26,Rpl18,Rpl32,Rps14,Rpl11,Rps19,Drg1,Rpl21,Rpl4,Cpeb1,Rpl23a,Rpl23,Rpl14,Rpl10a,Igf2bp1,Rps23,Rps3a1,Rps27a,Rps20,Rpl37a,Rpl6,Rpl41,Rpl36,Sars1,Rpl29,Rpl19,Rpl9,Eif2b4,Eif3i,Gtpbp1,Eif4a1,Rps24,Rpl31,Rps10,Lin28a,Rpl30,Rps11,Eif2ak4,R…
COLLAGEN METABOLIC PROCESS (GO: BP)	6.5945e-08	1.95425e-05	0.704976	-0.549024	-2.11295	111	Mmp9,Inhba,Mmp8,Prdx5,Adam15,Prtn3,Arrb2,Plod3,Vsir,Ccn2,Col6a1,Tgfb3,Col5a1,Mmp12,Mmp25,Vim,Serpinh1,Mmp23,Mmp19,Itgb1,Creb3l1,Ccl2,Ltbp1,Mmp2,Fn1,Bmp4,Mrc2,Ddr2,Col1a2,Col1a1,Cst3,Fgfr3,Fosl2,P3h3,Serpine1,Emilin1,P3h2,P3h1,P3h4,Scx,Ctsb,Itga2,Mmp14,Rcn3,Mmp16
TRANSLATION AT SYNAPSE (GO: BP)	5.45204e-07	0.000107713	0.659444	-0.674143	-2.27029	48	Rpl8,Rpl12,Rps5,Rpl28,Rps12,Rpl7a,Rpl10,Rpl13,Rplp2,Rps26,Rps16,Rpl17,Rpl26,Rpl32,Rps14,Rpl4,Rpl23a,Rpl23,Rpl14,Rpl10a,Rps27a,Rpl37a,Rpl6,Rpl36,Rpl29,Rpl9,Rps24,Rps10,Rps11,Rpl5,Rpl34

## Sheet: Table S4
Table S4: GSEA for cKit-
pathway	pval	padj	log2err	ES	NES	size	genes
PORPHYRIN CONTAINING COMPOUND METABOLIC PROCESS (GO: BP)	1.3397e-14	1.03251e-10	0.986546	0.838474	2.59309	40	Slc25a39,Slc6a9,Hmox1,Urod,Slc48a1,Hmbs,Fech,Blvrb,Eif2ak1,Alas2,Iba57,Atp5if1,Sptb,Uros,Ppox,Ank1,Slc11a2,Alad,Hebp1,Cpox,Spta1,Blvra,Abcb10,Fxn,Tmem14c
TETRAPYRROLE METABOLIC PROCESS (GO: BP)	5.44976e-13	1.40004e-09	0.921426	0.790651	2.54974	48	Slc25a39,Slc6a9,Hmox1,Urod,Slc48a1,Hmbs,Fech,Blvrb,Eif2ak1,Alas2,Iba57,Atp5if1,Sptb,Uros,Ppox,Ank1,Slc11a2,Alad,Hebp1,Cpox,Spta1,Blvra,Abcb10,Fxn,Tmem14c
HEME METABOLIC PROCESS (GO: BP)	6.58215e-12	7.24695e-09	0.887075	0.839268	2.52106	34	Slc25a39,Slc6a9,Hmox1,Urod,Slc48a1,Hmbs,Fech,Blvrb,Alas2,Iba57,Atp5if1,Uros,Ppox,Slc11a2,Alad,Hebp1,Cpox,Blvra,Abcb10,Fxn,Tmem14c
TETRAPYRROLE BIOSYNTHETIC PROCESS (GO: BP)	1.32068e-11	1.13094e-08	0.875325	0.847329	2.49451	30	Slc25a39,Slc6a9,Urod,Hmbs,Fech,Alas2,Iba57,Atp5if1,Sptb,Uros,Ppox,Ank1,Slc11a2,Alad,Cpox,Spta1,Abcb10,Fxn,Tmem14c
HEME BIOSYNTHETIC PROCESS (GO: BP)	8.86359e-11	5.25474e-08	0.839089	0.86303	2.44086	25	Slc25a39,Slc6a9,Urod,Hmbs,Fech,Alas2,Iba57,Atp5if1,Uros,Ppox,Slc11a2,Alad,Cpox,Abcb10,Fxn,Tmem14c
PIGMENT METABOLIC PROCESS (GO: BP)	1.88377e-08	6.04925e-06	0.733762	0.681752	2.29398	59	Slc25a39,Slc6a9,Hmox1,Urod,Slc48a1,Hmbs,Fech,Blvrb,Alas2,Iba57,Atp5if1,Uros,Ppox,Slc11a2,Alad,Hebp1,Cpox,Blvra,Abcb10,Fxn,Mfsd12,Tmem14c
ERYTHROCYTE HOMEOSTASIS (GO: BP)	1.07822e-11	1.03873e-08	0.875325	0.573158	2.249	166	Hba-a1,Axl,Cd24a,Smap1,Hmox1,Hbb-bs,Ypel4,Slc48a1,Rhd,Fech,Foxo3,Hscb,Slc25a38,Epb42,Hba-a2,Alas2,Bpgm,Tal1,Sox6,Trim10,Rhag,Atp5if1,Lmo2,Slc4a1,Zfpm1,Tspo2,Diaph3,Fam210b,Klf1,Gfi1b,Ank1,Slc11a2,Gata1,Dmtn,Dyrk3,Rb1,Dnase2a,Mafb,Mfhas1,Abcb10,Ankle1,Add1,Tmem14c,Slc1a5,Isg15,Racgap1,Ankrd54,Slc25a5,Ncapg2,Rps24,Trim58,Adgrf5,Tcea1,Chmp5
POSITIVE REGULATION OF CHROMOSOME SEGREGATION (GO: BP)	3.34174e-07	7.80447e-05	0.674963	0.771623	2.24646	29	Birc5,Cdk1,Mad2l1bp,Ccnb1,Ncapd2,Incenp,Aurkb,Cdca8,Ncaph2,Cenpe,Numa1,Smc6,Ncaph,Ncapd3,Smc2,Becn1,Ncapg2,Cdc6,Rad18
MITOTIC SISTER CHROMATID SEGREGATION (GO: BP)	5.51681e-12	7.08635e-09	0.887075	0.563056	2.21972	177	Ube2c,Birc5,Nusap1,Cdc20,Mzt1,Mybl2,Cdk1,Mad2l1bp,Plk1,Cltc,Ccnb1,Rb1,Ncapd2,Ska2,Cenpk,Kif22,Zwint,Phf13,Kif2a,Incenp,Nek2,Spag5,Rad21,Chek2,Gen1,Nuf2,Tubg1,Aurkb,Mad2l1,Cdca8,Tpx2,Ncaph2,Spc24,Haspin,Spc25,Kif18a,Ska1,Kpnb1,Cenpe,Psrc1,Kif18b,Cdca5,Espl1,Cit,Kif11,Numa1,Racgap1,Fbxo5,Ran,Ncaph,Ncapd3,Cdt1,Zfp207,Smc2,Wapl,Prc1,Becn1,Ncapg2,Chmp1b,Rab11a,Chmp5,Uhrf1,Ttk,Smarca5,Kif14,Clasp1,Dctn…
HYDROGEN PEROXIDE CATABOLIC PROCESS (GO: BP)	2.51439e-07	6.05575e-05	0.674963	0.781529	2.21184	26	Hbq1b,Hba-a1,Cat,Hbb-bs,Prdx2,Hbb-bt,Gpx1,Snca,Hbq1a,Gpx3,Prdx3,Hbb-bh1
MULTICELLULAR ORGANISMAL LEVEL IRON ION HOMEOSTASIS (GO: BP)	4.29275e-07	8.94168e-05	0.674963	0.771803	2.20202	27	Hmox1,Rhd,Fech,Epb42,Eif2ak1,Rhag,Ank1,Slc11a2,Picalm,Sod2
PIGMENT BIOSYNTHETIC PROCESS (GO: BP)	3.89574e-07	8.57841e-05	0.674963	0.688466	2.18777	45	Slc25a39,Slc6a9,Urod,Hmbs,Fech,Alas2,Iba57,Atp5if1,Uros,Ppox,Slc11a2,Alad,Cpox,Abcb10,Fxn,Mfsd12,Tmem14c
ERYTHROCYTE DEVELOPMENT (GO: BP)	2.47529e-07	6.05575e-05	0.674963	0.664041	2.18263	52	Hba-a1,Hbb-bs,Rhd,Epb42,Hba-a2,Alas2,Bpgm,Tal1,Sox6,Rhag,Slc4a1,Diaph3,Fam210b,Klf1,Ank1,Slc11a2,Gata1,Dmtn,Abcb10,Ankle1
POSITIVE REGULATION OF CHROMOSOME SEPARATION (GO: BP)	1.88797e-06	0.000305804	0.643552	0.758312	2.14614	26	Ube2c,Birc5,Cdc20,Mad2l1bp,Rb1,Ncapd2,Incenp,Aurkb,Cdca8,Ncaph2,Cenpe,Numa1,Ncaph,Ncapd3,Smc2,Ncapg2,Anapc11,Anapc5,Smc4
TRANSLATION AT SYNAPSE (GO: BP)	1.15784e-06	0.000202806	0.643552	0.664548	2.14308	48	Rpl35,Rpl36a,Rps15a,Rps26,Rpl6,Rpl37,Rpl29,Rpl15,Rpl34,Uba52,Rps24,Rpl24,Rpl13a,Rpl26,Rpl23a,Rpl23,Rpl27,Rpl10a,Eef2,Rpl27a,Rpl14,Rpl36,Rps27a,Rpl32,Rpl37a,Rpl22,Rpl5,Rpl7,Rpl9,Rpl4,Rpl28,Rps11,Rpl10,Rpl35a,Rps12
RESPONSE TO OXYGEN RADICAL (GO: BP)	5.61667e-06	0.000646085	0.610527	0.752424	2.12804	25	Gch1,Prdx2,Txnrd2,Ucp2,Cd36,Nqo1,Ccs,Sod2,Dhfr,Sod1,Mt3,Fancc
REGULATION OF MITOTIC SISTER CHROMATID SEGREGATION (GO: BP)	2.29045e-06	0.000346127	0.627257	0.635743	2.11187	56	Birc5,Cdc20,Cdk1,Mad2l1bp,Plk1,Ccnb1,Zwint,Incenp,Rad21,Gen1,Nuf2,Aurkb,Mad2l1,Cdca8,Spc24,Haspin,Spc25,Cenpe,Numa1,Fbxo5,Zfp207,Becn1
ONE CARBON COMPOUND TRANSPORT (GO: BP)	1.75403e-05	0.00151891	0.57561	0.790886	2.09593	18	Hba-a1,Hbb-bs,Car2,Rhag,Aqp1,Slc14a1,Hbb-bh1
GAS TRANSPORT (GO: BP)	5.96377e-06	0.000656611	0.610527	0.865241	2.07911	13	Hba-a1,Hbb-bs,Car2,Bpgm,Rhag,Aqp1,Hbb-bh1
HEMOGLOBIN METABOLIC PROCESS (GO: BP)	3.98282e-05	0.00298015	0.557332	0.75899	2.07734	21	Slc6a9,Cat,Fech,Slc25a37,Epb42,Eif2ak1,Alas2,Abcb10,Add1,Inha,Snx3
MITOTIC NUCLEAR DIVISION (GO: BP)	7.28721e-11	4.68021e-08	0.839089	0.502628	2.06357	256	Ube2c,Rgcc,Igf1,Birc5,Nusap1,Cdc20,Mzt1,Mybl2,Ube2s,Cdk1,Aurka,Tom1l1,Mad2l1bp,Plk1,Cltc,Ccnb1,Rb1,Ncapd2,Ska2,Cenpk,Kif22,Ube2srt,Zwint,Phf13,Smpd3,Kif2a,Incenp,Nek2,Spag5,Rad21,Chek2,Cdkn1b,Gen1,Nuf2,Mki67,Tubg1,Cep85,Aurkb,Mad2l1,Cdca8,Tpx2,Ncaph2,Spc24,Egf,Haspin,Spc25,Kif18a,Nfia,Ska1,Kpnb1,Cenpe,Psrc1,Kif18b,Cdca5,Espl1,Cit,Kif11,Numa1,Racgap1,Fbxo5,Nde1,Ran,Ncaph,Ncapd3,Cdt1,Zfp207,Smc2,Sp…
HEME A METABOLIC PROCESS (GO: BP)	1.29757e-05	0.00123462	0.593325	0.89648	2.05747	10	Urod,Hmbs,Fech,Uros,Ppox,Alad,Cpox
SISTER CHROMATID SEGREGATION (GO: BP)	1.97717e-09	8.46557e-07	0.774939	0.507154	2.05214	214	Ube2c,Birc5,Nusap1,Cdc20,Mzt1,Mybl2,Cdk1,Mad2l1bp,Plk1,Cltc,Ccnb1,Rb1,Ncapd2,Ska2,Cenpk,Kif22,Zwint,Phf13,Kif2a,Incenp,Tacc3,Nek2,Spag5,Rad21,Chek2,Gen1,Nuf2,Tubg1,Pbrm1,Aurkb,Mad2l1,Cdca8,Tpx2,Ncaph2,Spc24,Haspin,Spc25,Kif18a,Ska1,Kpnb1,Cenpe,Psrc1,Kif18b,Cdca5,Espl1,Cit,Kif11,Numa1,Racgap1,Dpf3,Fbxo5,Ran,Ncaph,Ncapd3,Cdt1,Zfp207,Smc2,Wapl,Prc1,Becn1,Ncapg2,Cdc6,Chmp1b,Rab11a,Chmp5,Uhrf1,Ttk,Sma…
SPINDLE CHECKPOINT SIGNALING (GO: BP)	6.23554e-06	0.000667463	0.610527	0.623022	2.05099	53	Birc5,Cdc20,Diaph3,Aurka,Mad2l1bp,Plk1,Ccnb1,Zwint,Incenp,Gen1,Nuf2,Aurkb,Mad2l1,Cdca8,Spc24,Haspin,Spc25,Cenpe,Zfp207
COMPLEMENT ACTIVATION (GO: BP)	2.75059e-05	0.00218545	0.57561	0.635483	2.04382	47	C1qc,C1qb,Fcna,C1qa,Cd5l,Rgcc,Cd59a,C4b,Ighm,Cfd
REGULATION OF SPINDLE CHECKPOINT (GO: BP)	2.63292e-05	0.00211374	0.57561	0.728228	2.03996	24	Birc5,Aurka,Mad2l1bp,Ccnb1,Zwint,Incenp,Gen1,Aurkb,Mad2l1,Cdca8
CHROMOSOME SEPARATION (GO: BP)	2.47862e-06	0.000353755	0.627257	0.578832	2.03896	79	Ube2c,Birc5,Cdc20,Mad2l1bp,Plk1,Ccnb1,Rb1,Ncapd2,Zwint,Incenp,Rad21,Gen1,Nuf2,Aurkb,Mad2l1,Cdca8,Ncaph2,Spc24,Haspin,Spc25,Cenpe,Espl1,Numa1,Fbxo5,Ncaph,Ncapd3,Zfp207,Smc2,Ncapg2,Ttk,Anapc11,Anapc5,Smc4,Kntc1,Bub3
REGULATION OF CYCLIN DEPENDENT PROTEIN KINASE ACTIVITY (GO: BP)	3.98506e-06	0.000479889	0.610527	0.599497	2.02855	62	Rgcc,Cdkn2d,Pim1,Fbxo7,Cdk5rap1,Ccnb2,Ccna2,Ccnf,Plk1,Ccnb1,Ccne1,Cdkn2c,Ccnd2,Cdkn1b,Egfr,Psrc1,Ccne2,Cnppd1,Hexim2,Blm,Stox1,Ccnd1,Cdkn2a,Lats2,Mapre3
MITOTIC SISTER CHROMATID SEPARATION (GO: BP)	5.88569e-06	0.000656611	0.610527	0.600625	2.02521	61	Ube2c,Birc5,Cdc20,Mad2l1bp,Plk1,Ccnb1,Rb1,Zwint,Incenp,Rad21,Gen1,Nuf2,Aurkb,Mad2l1,Cdca8,Ncaph2,Spc24,Haspin,Spc25,Cenpe,Fbxo5,Zfp207,Ttk,Anapc11,Anapc5,Kntc1,Bub3
REGULATION OF UBIQUITIN PROTEIN LIGASE ACTIVITY (GO: BP)	0.000127331	0.00737848	0.518848	0.737675	2.019	21	Fzr1,Cdc20,Ube2s,Plk1,Btrc,Ube2srt,Mad2l1,Rps7,Fbxo5,Bag2,Rpl23,Cdkn2a
REGULATION OF CELL CYCLE CHECKPOINT (GO: BP)	2.24716e-05	0.00184243	0.57561	0.622492	2.00745	48	Birc5,Aurka,Mad2l1bp,Ccnb1,Zwint,Cul4a,Incenp,Chek2,Gen1,Map3k20,Wdr76,Rfwd3,Aurkb,Mad2l1,Cdca8,Rpa2,Rad51,Rnaseh2b,Bard1,Ppp1r10
HYDROGEN PEROXIDE METABOLIC PROCESS (GO: BP)	2.3594e-05	0.0019141	0.57561	0.62136	2.0038	48	Hbq1b,Hba-a1,Cat,Hbb-bs,Prdx2,Hbb-bt,Gpx1,Snca,Hbq1a,Sod2,Pink1,Gpx3,Prdx3,Hbb-bh1
EXIT FROM MITOSIS (GO: BP)	4.55221e-05	0.0032485	0.557332	0.700873	1.99966	27	Ube2c,Rgcc,Birc5,Ube2s,Mad2l1bp,Ube2srt,Cdkn1b,Nfia,Cdca5,Rpl24,Clasp1,Nfix
MYELOID CELL HOMEOSTASIS (GO: BP)	1.00327e-08	3.68201e-06	0.74774	0.495369	1.99752	212	Hba-a1,Axl,Cd24a,Smap1,Hmox1,Hbb-bs,Ypel4,Slc48a1,Rhd,Fech,Foxo3,Hscb,Slc25a38,Epb42,Hba-a2,Alas2,Bpgm,Tal1,Sox6,Trim10,Rhag,Atp5if1,Lmo2,Slc4a1,Zfpm1,Tspo2,Diaph3,Fam210b,Klf1,Gfi1b,Ank1,Slc11a2,Gata1,Dmtn,Dyrk3,Rb1,Dnase2a,Mafb,Mfhas1,Mertk,Abcb10,Ankle1,Add1,Tmem14c,Slc1a5,Isg15,Racgap1,Ankrd54,Slc25a5,Ncapg2,Foxp3,Bcl2l11,Rps24,Trim58,Adgrf5,Tcea1,Chmp5,Ccl2,Sod1,Ampd3
POSITIVE REGULATION OF CELL CYCLE PROCESS (GO: BP)	4.88725e-09	1.8833e-06	0.761461	0.485981	1.98968	244	Cdc25b,Ube2c,Rgcc,Rrm2,Ube2b,Kcnn4,Igf1,Birc5,Nusap1,Cenpv,Gpsm2,Cdc20,Arf6,Cdk1,Aurka,Mad2l1bp,Dyrk3,Ccnb1,Rb1,Ncapd2,Ect2,E2f8,Ccne1,Cul4a,Smpd3,Sass6,Azin1,Incenp,Spag5,Ccnd2,Rad21,Chek2,Gen1,Map3k20,Mta3,Aurkb,Poc1a,Egfr,Orc1,Mad2l1,Cdca8,Ncaph2,Egf,Aif1,Pkn2,Cenpe,Cdca5,Cit,Ccne2,Numa1,Racgap1,Rad51c,Fam83d,Fbxo5,Wnk1,Smc6,Ncaph,Ncapd3,Smc2,Sphk1,Plk4,Becn1,Cdc25c,E2f7,Hyal1,Ncapg2,Pdgfb,Cdc…
POSITIVE REGULATION OF CELL CYCLE CHECKPOINT (GO: BP)	0.000264712	0.0132616	0.498493	0.761033	1.98941	17	Birc5,Incenp,Gen1,Map3k20,Aurkb,Mad2l1,Cdca8
CARBON DIOXIDE TRANSPORT (GO: BP)	8.09146e-05	0.00515379	0.538434	0.863753	1.98237	10	Hba-a1,Hbb-bs,Car2,Rhag,Aqp1,Hbb-bh1
SPINDLE ELONGATION (GO: BP)	0.000110192	0.0066161	0.538434	0.841054	1.98232	12	Birc5,Incenp,Kif4,Aurkb,Cdca8,Kif11,Numa1,Racgap1,Prc1
REGULATION OF EXIT FROM MITOSIS (GO: BP)	9.83712e-05	0.00601704	0.538434	0.822722	1.97694	13	Ube2c,Rgcc,Birc5,Mad2l1bp,Cdkn1b,Cdca5
NUCLEAR CHROMOSOME SEGREGATION (GO: BP)	4.62151e-10	2.37453e-07	0.814036	0.474677	1.97473	290	Ube2c,Ube2b,Syce2,Birc5,Nusap1,Cdc20,Ccnb2,Mzt1,Mybl2,Cdk1,Aurka,Pttg1,Mad2l1bp,Plk1,Cltc,Ccnb1,Rb1,Ncapd2,Ect2,Ska2,Cenpk,Kif22,Ccne1,Zwint,Phf13,Gem,Kif2a,Incenp,Tacc3,Rnf212,Nek2,Spag5,Rad21,Chek2,Gen1,Nuf2,Tubg1,Cenpf,Pbrm1,Kif4,Aurkb,Mad2l1,Cdca8,Tpx2,Ncaph2,Spc24,Haspin,Spc25,Kif18a,Ska1,Kpnb1,Cenpe,Psrc1,Kif18b,Cdca5,Espl1,Cit,Ccne2,Sgo1,Kif11,Numa1,Racgap1,Fam83d,Dpf3,Fbxo5,Ran,Ncaph,Ncap…
MITOTIC CHROMOSOME CONDENSATION (GO: BP)	0.000186837	0.00993072	0.518848	0.786479	1.97429	15	Nusap1,Ncapd2,Phf13,Ncaph2,Cdca5,Ncaph,Ncapd3,Smc2,Smarca5,Smc4
HEME B METABOLIC PROCESS (GO: BP)	5.8212e-05	0.00400571	0.557332	0.909849	1.96954	8	Urod,Hmbs,Fech,Uros,Ppox,Alad,Cpox
MEIOSIS I CELL CYCLE PROCESS (GO: BP)	2.36846e-06	0.000351034	0.627257	0.529227	1.96752	113	Cdc25b,Ube2b,Syce2,Ubb,Birc5,Rec114,Cdc20,Ccnb2,Aurka,Pttg1,Plk1,Ccne1,Zwint,Cks2,Rnf212,Ankle1,Haspin,Cenpe,Espl1,Ccne2,Rad51c,Fbxo5,Siah1a,Pkmyt1,Rad51,Cdc25c,Eme2,Chtf18,Bcl2l11,Ago4,Mybl1,Bag6,Stag3,Rec8,Foxj3,Mlh1,Prdm9,Dmc1,Dnmt3l,Mlh3,Cpeb1,Rad51ap1,Sun1,Top2a,Mcmdc2,Brca2,Msh5
POSITIVE REGULATION OF MITOTIC CELL CYCLE (GO: BP)	5.22146e-07	0.000103184	0.659444	0.522629	1.96071	124	Cdc25b,Ube2c,Lgmn,Rgcc,Rrm2,Birc5,Tal1,Cdc20,Cdk1,Mad2l1bp,Ccnb1,Rb1,Ccne1,Cul4a,Sass6,Ccnd2,Mta3,Egfr,Asns,Aif1,Pkn2,Cenpe,Cdca5,Ccne2,Rad51c,Fbxo5,Sphk1,Usp22,Cdc25c,Hyal1,Pdgfb,Fgfr1,Rab11a,Eif4e,Rad51b,Rrm1,Stox1,Dbf4,Ppp1r10,Ccnd1,Anapc11,Anapc5
METAPHASE CHROMOSOME ALIGNMENT (GO: BP)	4.72501e-06	0.000551752	0.610527	0.540883	1.95738	95	Birc5,Ccnb1,Rb1,Ect2,Ska2,Kif22,Zwint,Gem,Incenp,Nek2,Spag5,Nuf2,Cenpf,Aurkb,Cdca8,Spc24,Spc25,Kif18a,Ska1,Kpnb1,Cenpe,Psrc1,Cdca5,Sgo1,Numa1,Racgap1,Fam83d,Cdt1,Zfp207,Becn1,Chmp1b,Rab11a,Chmp5,Kif14,Dctn2,Knstrn,Kif2c,Bub3,Mlh1,Sirt1
CELLULAR RESPONSE TO OXYGEN RADICAL (GO: BP)	0.000386852	0.0167498	0.498493	0.712719	1.95069	21	Gch1,Prdx2,Cd36,Nqo1,Ccs,Sod2,Dhfr,Sod1,Mt3,Fancc
CHROMOSOME CONDENSATION (GO: BP)	6.55307e-05	0.00425463	0.538434	0.630613	1.95025	40	Nusap1,H1f0,H3f3a,Cdk1,Ccnb1,Ncapd2,Phf13,Ncaph2,Cdca5,Mcph1,Ncaph,Ncapd3,Smc2,H1f4,H1f2,Ncapg2,Smarca5,Smc4,H1f5,Top2a,Kdm4a
POSITIVE REGULATION OF UBIQUITIN PROTEIN LIGASE ACTIVITY (GO: BP)	6.23658e-05	0.00415037	0.538434	0.884367	1.94993	9	Fzr1,Cdc20,Ube2s,Plk1,Btrc,Ube2srt
CHROMOSOME SEGREGATION (GO: BP)	6.61099e-11	4.68021e-08	0.839089	0.456525	1.94904	390	Ube2c,Ube2b,Syce2,Birc5,Nusap1,Gpsm2,Cdc20,Ccnb2,Mzt1,Mybl2,Diaph3,Cdk1,Aurka,Pttg1,Mad2l1bp,Plk1,Haus4,Cltc,Ccnb1,Rb1,Ncapd2,Top1,Dlgap5,Ect2,Ska2,Cenpk,Oip5,Kif22,Ccne1,Zwint,Phf13,Bex4,Sass6,Gem,Kif2a,Incenp,Tacc3,Rnf212,Tubb5,Nek2,Spag5,Rad21,Chek2,Gen1,Nuf2,Mki67,Tubg1,Cenpf,Pbrm1,Kif4,Cep85,Aurkb,Mad2l1,Cdca8,Tpx2,Ncaph2,Spc24,Haspin,Cenpt,Spc25,Kif18a,Ska1,Kpnb1,Cenpe,Psrc1,Kif18b,Cdca5,Es…
POSITIVE REGULATION OF MITOTIC SISTER CHROMATID SEPARATION (GO: BP)	0.000672263	0.0252756	0.477271	0.74454	1.9463	17	Ube2c,Birc5,Cdc20,Mad2l1bp,Rb1,Incenp,Aurkb,Cdca8,Cenpe,Anapc11,Anapc5
POSITIVE REGULATION OF CELL CYCLE PHASE TRANSITION (GO: BP)	3.70005e-06	0.000462314	0.627257	0.526811	1.94142	108	Cdc25b,Ube2c,Rgcc,Rrm2,Birc5,Cdc20,Cdk1,Aurka,Mad2l1bp,Dyrk3,Ccnb1,Rb1,Ccne1,Cul4a,Sass6,Ccnd2,Chek2,Mta3,Egfr,Aif1,Cenpe,Cdca5,Ccne2,Rad51c,Fam83d,Fbxo5,Cdc25c,Hyal1,Ezh2,Rab11a,Rad51b,Rrm1,Stox1,Dbf4,Ppp1r10,Ccnd1,Anapc11,Anapc5
MEIOTIC CELL CYCLE PHASE TRANSITION (GO: BP)	0.000335368	0.015204	0.498493	0.8201	1.93293	12	Cdc25b,Cdc20,Ccnb2,Zwint,Pkmyt1,Cdc25c,Ttk
MITOTIC SPINDLE ELONGATION (GO: BP)	0.000146774	0.00813803	0.518848	0.873343	1.92562	9	Birc5,Incenp,Aurkb,Cdca8,Numa1,Racgap1,Prc1
RESPONSE TO IRON ION (GO: BP)	0.000493688	0.0197142	0.477271	0.725369	1.9223	18	Snca,Tfrc,Trf,Fxn,Aco1,Abat
MULTICELLULAR ORGANISMAL LEVEL CHEMICAL HOMEOSTASIS (GO: BP)	5.72474e-05	0.00397483	0.557332	0.563326	1.92039	65	Hmox1,Rhd,Fech,Epb42,Eif2ak1,Rhag,Aqp1,Ank1,Slc11a2,Picalm,Adcy6,Sod2,Lpcat1,Rcn3,Slc40a1,Fgf7,Adgrf5,Mllt6,Hyal2
REGULATION OF CYTOKINESIS (GO: BP)	3.06596e-05	0.00241116	0.557332	0.541934	1.91487	80	Cdc25b,Birc5,Cenpv,Arf6,Aurka,Bcl2l1,Plk1,Ect2,E2f8,Kif20a,Incenp,Sh3glb1,Calm3,Aurkb,Cdca8,Pkn2,Cit,Racgap1,Wnk1,Ccp110,Zfyve26,Prc1,Becn1,E2f7,Calm2,Cdc6,Rab11a,Kif14,Myo19
REGULATION OF CHROMOSOME SEGREGATION (GO: BP)	1.94426e-06	0.000305804	0.627257	0.509365	1.91223	122	Ube2c,Birc5,Cdc20,Cdk1,Mad2l1bp,Plk1,Ccnb1,Rb1,Ncapd2,Zwint,Incenp,Tacc3,Rad21,Gen1,Nuf2,Mki67,Pbrm1,Aurkb,Mad2l1,Cdca8,Ncaph2,Spc24,Haspin,Spc25,Cenpe,Cit,Numa1,Dpf3,Fbxo5,Smc6,Ncaph,Ncapd3,Zfp207,Smc2,Becn1,Ncapg2,Cdc6,Chtf18,Rad18,Ttk,Hecw2,Cdca2,Anapc11,Anapc5,Smc4,Kif2c,Kntc1
FEMALE MEIOSIS I (GO: BP)	0.000414381	0.0172629	0.498493	0.793377	1.90642	13	Cdc25b,Ubb,Ccnb2,Aurka,Cenpe,Fbxo5
POSITIVE REGULATION OF CELL CYCLE (GO: BP)	2.3894e-09	9.69216e-07	0.774939	0.454429	1.90049	318	Cdc25b,Rad23a,Ube2c,Lgmn,Rgcc,Rrm2,Ube2b,Kcnn4,Igf1,Birc5,Pim1,Tal1,Nusap1,Cenpv,Gpsm2,Cdc20,Arf6,Cdk1,Aurka,Fntb,Mad2l1bp,Dyrk3,Ccnb1,Rb1,Ncapd2,Ect2,E2f8,Ccne1,Cul4a,Smpd3,Sass6,Azin1,Incenp,Spag5,Ccnd2,Rad21,Chek2,Gen1,Map3k20,Mta3,Aurkb,Poc1a,Egfr,Orc1,Mad2l1,Cdca8,Ncaph2,Asns,Egf,Aif1,Pkn2,Rps15a,Cenpe,Psrc1,Cdca5,Cit,Ccne2,Numa1,Racgap1,Rad51c,Fam83d,Fbxo5,Wnk1,Smc6,Tgfb2,Ncaph,Tgm1,Ncapd3,…
POSITIVE REGULATION OF MITOTIC CELL CYCLE PHASE TRANSITION (GO: BP)	3.47333e-05	0.00265039	0.557332	0.523657	1.89535	93	Cdc25b,Ube2c,Rgcc,Rrm2,Birc5,Cdc20,Cdk1,Mad2l1bp,Ccnb1,Rb1,Ccne1,Cul4a,Sass6,Ccnd2,Mta3,Egfr,Aif1,Cenpe,Cdca5,Ccne2,Rad51c,Fbxo5,Cdc25c,Hyal1,Rab11a,Rad51b,Rrm1,Stox1,Dbf4,Ccnd1,Anapc11,Anapc5
MITOTIC SPINDLE ORGANIZATION (GO: BP)	3.38686e-06	0.000442416	0.627257	0.502655	1.89088	126	Birc5,Gpsm2,Cdc20,Mzt1,Mybl2,Aurka,Plk1,Cltc,Ccnb1,Dlgap5,Sass6,Kif2a,Incenp,Tacc3,Nek2,Chek2,Nuf2,Tubg1,Kif4,Aurkb,Poc1a,Cdca8,Tpx2,Spc25,Kpnb1,Cenpe,Psrc1,Kif11,Numa1,Racgap1,Zfp207,Prc1,Ptpa,Chmp1b,Rab11a,Ints13,Chmp5,Uhrf1,Clasp1,Dctn2,Wdr62,Aaas,Ckap5
THYROID HORMONE TRANSPORT (GO: BP)	0.000481301	0.0194593	0.498493	0.871644	1.88684	8	Slc16a10,Slc7a5,Slc3a2,Slc7a8
NEGATIVE REGULATION OF NUCLEAR DIVISION (GO: BP)	0.000120859	0.00707512	0.538434	0.553544	1.8839	64	Birc5,Cdc20,Tom1l1,Mad2l1bp,Plk1,Ccnb1,Zwint,Incenp,Rad21,Gen1,Nuf2,Aurkb,Mad2l1,Cdca8,Spc24,Haspin,Spc25,Cenpe,Fbxo5,Zfp207
ORGANELLE FISSION (GO: BP)	7.01108e-11	4.68021e-08	0.839089	0.434603	1.88315	455	Fzr1,Cdc25b,Ube2c,Marchf5,Rgcc,Ube2b,Spire1,Syce2,Ubb,Igf1,Ucp2,Birc5,Nusap1,Cdc20,Ccnb2,Mzt1,Mybl2,Ube2s,Cdk1,Aurka,Pttg1,Tom1l1,Mad2l1bp,Plk1,Cltc,Ccnb1,Rb1,Ncapd2,Ska2,Cenpk,Mtfr1,Kif22,Ccne1,Ube2srt,Zwint,Phf13,Smpd3,Pink1,Kif2a,Incenp,Cks2,Mff,Rnf212,Nek2,Spag5,Rad21,Chek2,Cdkn1b,Ankle1,Gen1,Nuf2,Fignl1,Mki67,Tubg1,Cep85,Aurkb,Mad2l1,Cdca8,Tpx2,Fis1,Ncaph2,Spc24,Egf,Haspin,Spc25,Kif18a,Nfia,…
CYTOPLASMIC TRANSLATION (GO: BP)	1.53164e-06	0.000256616	0.643552	0.487045	1.88244	150	Eif5,Cpeb4,Parp16,Aars1,Rpl41,Sars1,Rpl36a,Rps15a,Rps26,Rps29,Rpl6,Rpl36-ps12,Rps7,Eif4a1,Rpl29,Rpl15,Rpl34,Ftsj1,Rps20,Uba52,Rpl19,Eif2b2,Rps24,Rpl24,Gtpbp1,Slbp,Rpl13a,Rpl26,Rpl31,Cpeb3,Rpl23a,Rpl23,Rpl30,Rpl27,Eif2s3x,Mif4gd,Rpl3,Rpl10a,Rps6,Eef2,Ckap5,Rpl27a,Rpl14,Rpl36,Rps27a,Eif3m,Csde1,Rpl32,Mcts1,Rps2,Mcts2,Rps18,Rplp0,Rpl21,Cpeb1,Rps4x,Rpl37a,Rpl22,Rpl39,Eif2d,Rpl5,Rps25,Eif2s3y,Rpl7,Rpl…
REGULATION OF METAPHASE PLATE CONGRESSION (GO: BP)	0.000787196	0.0279581	0.477271	0.768021	1.8821	14	Birc5,Incenp,Spag5,Aurkb,Cdca8,Numa1,Becn1,Sirt1
CHROMOSOME LOCALIZATION (GO: BP)	5.8813e-06	0.000656611	0.610527	0.510037	1.88123	111	Ube2b,Lmna,Birc5,Ccnb1,Rb1,Ect2,Ska2,Kif22,Zwint,Gem,Incenp,Nek2,Spag5,Nuf2,Cenpf,Aurkb,Cdca8,Spc24,Spc25,Kif18a,Ska1,Kpnb1,Cenpe,Psrc1,Cdca5,Sgo1,Numa1,Racgap1,Fam83d,Nde1,Cdt1,Zfp207,Becn1,Chmp1b,Rab11a,Chmp5,Kif14,Dctn2,Knstrn,Kif2c,Bub3,Mlh1,Sirt1
VASCULAR ASSOCIATED SMOOTH MUSCLE CELL APOPTOTIC PROCESS (GO: BP)	0.00114395	0.0365826	0.45506	0.730617	1.8773	16	Igf1,Slc7a5,Sod2,Agtr1a,Pdcd4,Dnmt1
ATTACHMENT OF SPINDLE MICROTUBULES TO KINETOCHORE (GO: BP)	0.000253169	0.0130825	0.498493	0.576945	1.87628	49	Birc5,Ccnb1,Rb1,Ect2,Ska2,Incenp,Nek2,Spag5,Nuf2,Aurkb,Cdca8,Spc24,Spc25,Ska1,Cenpe,Sgo1,Racgap1,Cdt1,Zfp207,Becn1,Knstrn,Kif2c,Bub3,Sirt1,Pmf1,Rcc2,Nsl1,Ska3,Mis12
CELLULAR RESPONSE TO TOXIC SUBSTANCE (GO: BP)	0.000121178	0.00707512	0.538434	0.555148	1.87187	61	Gch1,Cat,Prdx2,Abcg2,Pim1,Cd36,Aldh1a1,Nqo1,Ccs,Sod2,Pink1,Gpx3,Dhfr,Gstm5,Aldh2,Lancl1,Rdh11,Sod1,Mt3,Fancc,Abcb6,Cyp1b1,Sesn1,Prdx6b,Slc29a4
CELLULAR OXIDANT DETOXIFICATION (GO: BP)	0.00069549	0.0255598	0.477271	0.635741	1.8716	30	Gch1,Cat,Prdx2,Cd36,Nqo1,Ccs,Sod2,Gpx3,Dhfr,Sod1,Mt3,Fancc,Sesn1,Prdx6b
REGULATION OF HEMOGLOBIN BIOSYNTHETIC PROCESS (GO: BP)	0.000364827	0.0159757	0.498493	0.903345	1.86891	7	Slc6a9,Fech,Slc25a37,Eif2ak1,Abcb10
MICROTUBULE CYTOSKELETON ORGANIZATION INVOLVED IN MITOSIS (GO: BP)	2.73755e-06	0.000370145	0.627257	0.482017	1.86777	156	Birc5,Nusap1,Gpsm2,Cdc20,Mzt1,Mybl2,Cdk1,Aurka,Plk1,Cltc,Ccnb1,Dlgap5,Cenpa,Sass6,Kif2a,Incenp,Tacc3,Nek2,Chek2,Nuf2,Tubg1,Kif4,Aurkb,Poc1a,Mad2l1,Cdca8,Tpx2,Spc25,Kpnb1,Cenpe,Psrc1,Kif11,Numa1,Racgap1,Mcph1,Nde1,Zfp207,Enkd1,Prc1,Ptpa,Chmp1b,Rab11a,Ints13,Chmp5,Uhrf1,Clasp1,Dctn2,Wdr62
BRANCHED CHAIN AMINO ACID TRANSPORT (GO: BP)	0.000786605	0.0279581	0.477271	0.799282	1.86681	11	Slc7a5,Slc3a2,Slc43a1,Slc7a8,Slc43a2
CELL DIVISION (GO: BP)	5.27651e-12	7.08635e-09	0.887075	0.423794	1.86373	583	Fzr1,Cat,Cdc25b,Ube2c,Ppp1cb,Mllt3,Spire1,Syce2,Birc5,Tal1,Nusap1,Cenpv,Gpsm2,Cdc20,Epb41,Ccnb2,Ccna2,Cdca3,Itgb1bp1,Arf6,Diaph3,Ube2s,Ccnf,Cdk1,Aurka,Pttg1,Bcl2l1,Plk1,Haus4,Cks1b,Cltc,Dyrk3,Ccnb1,Rb1,Ncapd2,Top1,Ect2,Ska2,Oip5,E2f8,Ccne1,Zwint,Kif20a,Cenpa,Rab10,Phf13,Stx2,Kif2a,Incenp,Cks2,Sh3glb1,Tacc3,Nek2,Mical3,Vegfd,Spag5,Ccnd2,Rad21,Chek2,Iqgap3,Calm3,Susd2,Nuf2,Garem1,Aurkb,Mad2l1,Cdca8…
PROTEIN K11 LINKED UBIQUITINATION (GO: BP)	0.000773198	0.0277164	0.477271	0.631403	1.85883	30	Ube2c,Ube2b,Ube2h,Ube2s,Ube2e3,Ube2t,Rnf26,Ube2a,Trim26,Rnf115,Arel1,Anapc11,Anapc5,Anapc10
DOPAMINE BIOSYNTHETIC PROCESS (GO: BP)	0.00138432	0.0420038	0.45506	0.73939	1.85609	15	Gch1,Snca,Agtr1a,Tgfb2,Aldh2
HEMOGLOBIN BIOSYNTHETIC PROCESS (GO: BP)	0.0013085	0.0403383	0.45506	0.756184	1.85309	14	Slc6a9,Fech,Slc25a37,Eif2ak1,Alas2,Abcb10,Inha,Snx3
VISCERAL SEROUS PERICARDIUM DEVELOPMENT (GO: BP)	0.000634291	0.0244424	0.477271	0.892906	1.84731	7	Vcam1,Epor,Rxra,Itga4
MITOTIC METAPHASE CHROMOSOME ALIGNMENT (GO: BP)	0.000433562	0.0179649	0.498493	0.548963	1.84156	58	Birc5,Ccnb1,Ska2,Kif22,Incenp,Nuf2,Aurkb,Cdca8,Kif18a,Ska1,Kpnb1,Cenpe,Psrc1,Cdca5,Cdt1,Becn1,Chmp1b,Rab11a,Chmp5,Kif14,Dctn2,Kif2c
MEIOTIC CHROMOSOME SEGREGATION (GO: BP)	0.000179716	0.00968581	0.518848	0.518948	1.83952	82	Ube2b,Syce2,Ccnb2,Aurka,Pttg1,Plk1,Ccne1,Zwint,Rnf212,Nuf2,Ncaph2,Haspin,Cenpe,Espl1,Ccne2,Sgo1,Fbxo5,Ncaph,Ncapd3,Smc2,Aspm,Ago4,Ttk,Bag6,Smc4,Stag3,Rec8,Ddb1,Mlh1,Prdm9,Dmc1,Mlh3,Cpeb1,Sun1,Top2a,Mcmdc2,Brca2,Msh5
2FE 2S CLUSTER ASSEMBLY (GO: BP)	0.000895935	0.030553	0.477271	0.832623	1.83584	9	Hscb,Iscu,Glrx5,Lyrm4,Fxn,Nfs1
MEIOTIC CELL CYCLE PROCESS (GO: BP)	1.09133e-06	0.000195602	0.643552	0.457497	1.83436	200	Fzr1,Cdc25b,Ube2b,Spire1,Syce2,Ubb,Birc5,Rec114,Cdc20,Ccnb2,Aurka,Pttg1,Plk1,Ncapd2,Ccne1,Zwint,Mcm7,Incenp,Cks2,Rnf212,Ankle1,Nuf2,Fignl1,Mcm2,Tubg1,Ncaph2,Haspin,Kif18a,Cenpe,Mcm4,Espl1,Ccne2,Sgo1,Rad51c,Fbxo5,Siah1a,Ncaph,Ncapd3,Pkmyt1,Rad51,Mcm5,Smc2,Cdc25c,Eme2,Aspm,Chtf18,Bcl2l11,Ago4,Ttk,Mybl1,Bag6,Lif,Smc4,Orc4,Stag3,Rec8,Foxj3,Ddb1,Mlh1,Prdm9,Dmc1,Dnmt3l,Mlh3,Cpeb1,Rad51ap1,Sun1,Top2a
CELL CYCLE G2 M PHASE TRANSITION (GO: BP)	1.60169e-05	0.00143538	0.57561	0.472483	1.82999	153	Fzr1,Cdc25b,Ppm1d,Birc5,Foxo4,Ccnb2,Ccna2,Cdk1,Plk1,Dyrk3,Ccnb1,Paxip1,Rad21,Chek2,Calm3,Mta3,Cenpf,Aurkb,Orc1,Ube2a,Cit,Atf5,Rad51c,Fbxo5,Foxm1,Wee1,Blm,Pkmyt1,Usp22,Nbn,Cdc25c,Rnaseh2b,Calm2,Cdc6,Syf2,Rab11a,Trp53,Rad51b,Rrm1,Fbxl7,Bard1,Stox1,Kif14,Ccnd1,Cdk2,Abcb1a,Wnt10b,Brca1,Cdkn2a,Donson
POSITIVE REGULATION OF CELL DIVISION (GO: BP)	0.000214594	0.0113279	0.518848	0.520466	1.82964	76	Cat,Cdc25b,Birc5,Tal1,Cenpv,Itgb1bp1,Arf6,Ect2,Incenp,Vegfd,Garem1,Aurkb,Cdca8,Pkn2,Cit,Racgap1,Vegfb,Wnk1,Tgfb2,Pdgfb,Cdc6,Tgfb3,Rab11a,Fgf7,Kif14,Fgf1
REGULATION OF CHROMOSOME CONDENSATION (GO: BP)	0.00156425	0.0456654	0.45506	0.7824	1.82738	11	H3f3a,Ccnb1,Ncapd2,Mcph1,Ncaph,Smc2,Smarca5,Smc4
FEMALE MEIOTIC NUCLEAR DIVISION (GO: BP)	0.000554374	0.0215786	0.477271	0.590428	1.82598	40	Cdc25b,Spire1,Ubb,Ccnb2,Aurka,Plk1,Ncaph2,Cenpe,Fbxo5,Ncaph,Ttk,Orc4,Ddb1,Mlh1,Mlh3,Top2a
POSITIVE REGULATION OF SPINDLE CHECKPOINT (GO: BP)	0.00141641	0.0426976	0.45506	0.759239	1.82439	13	Birc5,Incenp,Gen1,Aurkb,Mad2l1,Cdca8
PROTOPORPHYRINOGEN IX METABOLIC PROCESS (GO: BP)	4.18475e-05	0.00309973	0.557332	0.963285	1.82377	5	Fech,Eif2ak1,Ppox,Cpox
NEGATIVE REGULATION OF CHROMOSOME ORGANIZATION (GO: BP)	5.12675e-05	0.00359199	0.557332	0.505414	1.82305	96	Birc5,Cdc20,H3f3a,Mad2l1bp,Plk1,Ccnb1,Zwint,Pif1,Incenp,Rad21,Gen1,Nuf2,Mcm2,Aurkb,Mad2l1,Cdca8,Spc24,Haspin,Spc25,Sub1,Cenpe,Fbxo5,Zfp207,Wapl,Nbn,Trp53,Terf2,Ttk,Smarca5,Pot1a,Kntc1,Pml,Bub3
AUTOPHAGY OF MITOCHONDRION (GO: BP)	7.02277e-05	0.00451037	0.538434	0.505667	1.82054	91	Gabarapl2,Bnip3l,Map1lc3b,Ulk1,Atg4d,Fbxo7,Atp5if1,Wipi1,Atg4a,Atg12,Tspo,Pink1,Sqstm1,Map1lc3a,Wipi2,Fis1,Atg13,Gabarapl1,Lrba,Slc25a5,Rimoc1,Atg4b,Htra2,Becn1,Fbxl4,Cisd2,Atg9a,Trp53
MITOTIC CELL CYCLE CHECKPOINT SIGNALING (GO: BP)	1.1027e-05	0.00107576	0.593325	0.469839	1.81473	148	Fzr1,Rbm38,Birc5,Foxo4,Cdc20,Cdk1,Mad2l1bp,Plk1,Ccnb1,Zwint,Incenp,Chek2,Gen1,Map3k20,Nuf2,Rfwd3,Aurkb,Orc1,Mad2l1,Cdca8,Spc24,Haspin,Spc25,Cenpe,Tipin,Rpa2,Blm,Zfp207,Nbn,Eme2,E2f7,Stk33,Cdc6,Syf2,Trp53,Rpl24,Bard1,Rpl26,Ttk,Ppp1r10,Ccnd1,Rps6,Kntc1,Brca1,Pml,Donson,Bub3,Prkdc
ATTACHMENT OF MITOTIC SPINDLE MICROTUBULES TO KINETOCHORE (GO: BP)	0.00149303	0.0442055	0.45506	0.643632	1.80298	24	Birc5,Ska2,Incenp,Nuf2,Aurkb,Cdca8,Ska1,Cenpe,Cdt1,Becn1,Kif2c,Sirt1,Ska3,Mis12
REGULATION OF SISTER CHROMATID SEGREGATION (GO: BP)	8.52915e-05	0.00538804	0.538434	0.495337	1.80171	100	Ube2c,Birc5,Cdc20,Cdk1,Mad2l1bp,Plk1,Ccnb1,Rb1,Zwint,Incenp,Tacc3,Rad21,Gen1,Nuf2,Pbrm1,Aurkb,Mad2l1,Cdca8,Spc24,Haspin,Spc25,Cenpe,Cit,Numa1,Dpf3,Fbxo5,Zfp207,Becn1,Cdc6,Ttk,Hecw2,Anapc11,Anapc5
DETOXIFICATION (GO: BP)	0.00081153	0.0284294	0.477271	0.523974	1.80006	69	Gch1,Cat,Prdx2,Abcg2,Pim1,Cd36,Aldh1a1,Nqo1,Ccs,Sod2,Gpx3,Dhfr,Slc30a1,Gstm5,Aldh2,Lancl1,Rdh11,Mt1,Sod1,Mt3,Fancc,Abcb6,Abcb1a,Sesn1,Prdx6b,Slc29a4
SPINDLE ASSEMBLY (GO: BP)	3.97249e-05	0.00298015	0.557332	0.47913	1.79575	123	Birc5,Gpsm2,Cdc20,Ccnb2,Mzt1,Mybl2,Aurka,Plk1,Haus4,Cltc,Sass6,Kif2a,Incenp,Tubb5,Nek2,Spag5,Chek2,Aurkb,Cdca8,Tpx2,Kpnb1,Cenpe,Kif11,Numa1,Racgap1,Fbxo5,Haus5,Zfp207,Prc1,Aspm,Chmp1b,Rab11a,Chmp5,Uhrf1,Clasp1,Haus8,Haus3,Aaas,Tubgcp3,Haus1,Mapre3,Ddb1,Mlh1,Sac3d1
MITOTIC CELL CYCLE (GO: BP)	1.12464e-13	4.3338e-10	0.954542	0.399866	1.79328	828	Fzr1,Cdc25b,Ube2c,Ubd,Psme3,Ppm1d,Tuba1c,Lgmn,Rgcc,Rrm2,Igf1,Cdkn2d,Rbm38,Birc5,Tal1,Nusap1,Fbxo7,Foxo4,Gpsm2,Cdc20,Ccnb2,Ccna2,Mzt1,Mybl2,Arf6,Ube2s,Ccnf,Cdk1,Aurka,Klf11,Tom1l1,Mad2l1bp,Plk1,Cks1b,Cltc,Ccnb1,Rb1,Ncapd2,Dlgap5,Ect2,Ska2,Cenpk,Tubb4b,E2f8,Kif22,Ccne1,Cdkn2c,Ube2srt,Zwint,Kif20a,Cenpa,Cul4a,Phf13,Bex4,Smpd3,Sass6,Stx2,Gem,Kif2a,Incenp,Cks2,Tacc3,Pcna,Tubb5,Nek2,Spag5,Btg2,Ccnd2,Ra…
INTRACELLULAR IRON ION HOMEOSTASIS (GO: BP)	0.000395235	0.0168716	0.498493	0.531763	1.79302	61	Hmox1,Iscu,Alas2,Tfrc,Fth1,Trf,Slc11a2,Picalm,Nubp1,Ftl1,Erfe,Fxn,Aco1,Ndfip1,Slc40a1,Atp6v0d1,Steap3,Sod1
REGULATION OF CELL DIVISION (GO: BP)	8.82417e-06	0.000921155	0.593325	0.462851	1.79298	157	Cat,Cdc25b,Mllt3,Birc5,Tal1,Cenpv,Itgb1bp1,Arf6,Aurka,Bcl2l1,Plk1,Ect2,E2f8,Kif20a,Incenp,Sh3glb1,Vegfd,Calm3,Susd2,Garem1,Aurkb,Cdca8,Pkn2,Kif18b,Cit,Racgap1,Vegfb,Wnk1,Ccp110,Tgfb2,Blm,Zfyve26,Prc1,Becn1,E2f7,Aspm,Calm2,Pdgfb,Cdc6,Tgfb3,Rab11a,Fgf7,Intu,Kif14,Myo19,Fgf1
REGULATION OF MITOTIC NUCLEAR DIVISION (GO: BP)	4.51698e-05	0.0032485	0.557332	0.485237	1.78976	111	Ube2c,Rgcc,Igf1,Birc5,Nusap1,Cdc20,Tom1l1,Mad2l1bp,Plk1,Ccnb1,Rb1,Zwint,Smpd3,Incenp,Rad21,Gen1,Nuf2,Mki67,Tubg1,Aurkb,Mad2l1,Cdca8,Spc24,Egf,Haspin,Spc25,Cenpe,Fbxo5,Zfp207,Sphk1,Pdgfb,Ttk,Cdca2,Anapc11,Anapc5,Ywhah
MITOTIC CELL CYCLE PHASE TRANSITION (GO: BP)	2.66639e-08	8.21996e-06	0.733762	0.414887	1.78463	420	Fzr1,Cdc25b,Ube2c,Ubd,Psme3,Ppm1d,Rgcc,Rrm2,Cdkn2d,Rbm38,Birc5,Fbxo7,Foxo4,Cdc20,Ccnb2,Ccna2,Ube2s,Ccnf,Cdk1,Klf11,Mad2l1bp,Plk1,Cks1b,Ccnb1,Rb1,Ccne1,Cdkn2c,Ube2srt,Zwint,Cul4a,Sass6,Incenp,Cks2,Tacc3,Ccnd2,Rad21,Chek2,Cdkn1b,Iqgap3,Calm3,Gen1,Nuf2,Mta3,Rfwd3,Cenpf,Pbrm1,Aurkb,Tcf19,Egfr,Orc1,Mad2l1,Cdca8,Spc24,Haspin,Spc25,Aif1,Tpra1,Nfia,Cenpe,Ube2a,Cdca5,Cit,Ccne2,Rpa2,Rad51c,Dpf3,Fbxo5,Foxm1…
POSITIVE REGULATION OF MITOTIC SISTER CHROMATID SEGREGATION (GO: BP)	0.00109187	0.0352093	0.45506	0.892022	1.77813	6	Cdk1,Mad2l1bp,Aurkb,Numa1
MYELOID CELL DEVELOPMENT (GO: BP)	0.000142213	0.00805911	0.518848	0.490999	1.77724	98	Hba-a1,Hbb-bs,Rhd,Epb42,Hba-a2,Alas2,Bpgm,Tal1,Sox6,Rhag,Slc4a1,Zfpm1,Diaph3,Fam210b,Klf1,Ank1,Slc11a2,Gata1,Dmtn,Pabpc4,Fam20c,Abcb10,Ankle1,Tjp2
CELL CYCLE CHECKPOINT SIGNALING (GO: BP)	1.48875e-05	0.00134986	0.593325	0.44422	1.77267	192	Fzr1,Rbm38,Birc5,Foxo4,Cdc20,Diaph3,Cdk1,Aurka,Mad2l1bp,Plk1,Ccnb1,Zwint,Cul4a,Incenp,Chek2,Gen1,Map3k20,Nuf2,Wdr76,Rfwd3,Aurkb,Orc1,Mad2l1,Cdca8,Spc24,Haspin,Spc25,Cenpe,Tipin,Trp53bp1,Rpa2,Blm,Rad51,Cdt1,Zfp207,H2ax,Nbn,Eme2,E2f7,Rnaseh2b,Stk33,Cdc6,Syf2,Trp53,Rpl24,Bard1,Rpl26,Ttk,Ppp1r10,Ccnd1,Rps6,Kntc1,Brca1,E2f1,Dtx3l,Pml,Donson,Bub3,Prkdc
MITOTIC SPINDLE ASSEMBLY (GO: BP)	0.000269418	0.0132616	0.498493	0.510867	1.77083	71	Birc5,Cdc20,Mzt1,Mybl2,Plk1,Cltc,Kif2a,Incenp,Nek2,Chek2,Aurkb,Cdca8,Tpx2,Kpnb1,Kif11,Racgap1,Zfp207,Prc1,Chmp1b,Rab11a,Chmp5,Uhrf1,Clasp1
REGULATION OF FOCAL ADHESION DISASSEMBLY (GO: BP)	0.00147085	0.0437679	0.45506	0.881845	1.75784	6	Pik3r1,Arf6,Dusp3
SPINDLE ORGANIZATION (GO: BP)	1.95248e-05	0.0016536	0.57561	0.440661	1.75703	190	Birc5,Gpsm2,Cdc20,Ccnb2,Mzt1,Mybl2,Aurka,Plk1,Haus4,Cltc,Ccnb1,Dlgap5,Sass6,Kif2a,Incenp,Tacc3,Tubb5,Nek2,Spag5,Chek2,Nuf2,Tubg1,Kif4,Aurkb,Poc1a,Cdca8,Tpx2,Spc25,Kpnb1,Cenpe,Kiz,Psrc1,Espl1,Kif11,Numa1,Racgap1,Aunip,Fbxo5,Haus5,Zfp207,Prc1,Ptpa,Aspm,Chmp1b,Rab11a,Ints13,Chmp5,Uhrf1,Clasp1,Haus8,Dctn2,Haus3,Wdr62,Knstrn,Aaas,Tubgcp3,Ckap5,Haus1,Mapre3,Stmn1,Ddb1,Mlh1,Sac3d1
NEGATIVE REGULATION OF CELL CYCLE PROCESS (GO: BP)	2.14394e-06	0.000330467	0.627257	0.421548	1.75269	291	Fzr1,Rgcc,Cdkn2d,Rbm38,Birc5,Fbxo7,Foxo4,Cdc20,Diaph3,Ccnf,Cdk1,Aurka,Tom1l1,Ppp2r5b,Mad2l1bp,Plk1,Ccnb1,Rb1,E2f8,Zwint,Nubp1,Cul4a,Incenp,Nek2,Rad21,Chek2,Gen1,Susd2,Map3k20,Nuf2,Wdr76,Rfwd3,Aurkb,Orc1,Mad2l1,Cdca8,Spc24,Haspin,Spc25,Tpra1,Cenpe,Tipin,Trp53bp1,Atf5,Rpa2,Fbxo5,Ccp110,Wee1,Blm,Pkmyt1,Rad51,Cdt1,Zfp207,H2ax,Wapl,Nbn,Eme2,E2f7,Rnaseh2b,Stk33,Cdc6,Syf2,Ezh2,Chtf18,Trp53,Rpl24,Bard1,R…
MEIOTIC CELL CYCLE (GO: BP)	4.13591e-06	0.000490392	0.610527	0.426173	1.74968	256	Fzr1,Cdc25b,Pms2,Ube2b,Spire1,Syce2,Ubb,Birc5,Rec114,Cdc20,Ccnb2,Aurka,Pttg1,Plk1,Ncapd2,Ccne1,Zwint,Mcm7,Incenp,Cks2,Rnf212,Nek2,Clgn,Ankle1,Nuf2,Fignl1,Mcm2,Mki67,Tubg1,Ncaph2,Haspin,Kif18a,Cenpe,Mcm4,Espl1,Ccne2,Sgo1,Rad51c,Fbxo5,Siah1a,Ncaph,Ncapd3,Pkmyt1,Rad51,Mcm5,Smc2,H2ax,Nbn,Cdc25c,Eme2,Aspm,Chtf18,Bcl2l11,Ago4,Rpa1,Ttk,Mybl1,Bag6,Lif,Smc4,Cdk2,Orc4,Tubgcp3,Stag3,Bub3,Rec8,Foxj3,Ddb1,Mns…
SPINDLE ASSEMBLY INVOLVED IN FEMALE MEIOSIS I (GO: BP)	0.00115722	0.0368541	0.45506	0.920655	1.74306	5	Ccnb2,Aurka,Cenpe,Fbxo5
L LEUCINE IMPORT ACROSS PLASMA MEMBRANE (GO: BP)	0.0011931	0.0377241	0.45506	0.919173	1.74025	5	Slc7a5,Slc3a2,Slc43a1,Slc7a8,Slc43a2
NEGATIVE REGULATION OF MITOTIC CELL CYCLE PHASE TRANSITION (GO: BP)	6.24683e-05	0.00415037	0.538434	0.439091	1.73195	175	Fzr1,Rgcc,Rbm38,Birc5,Fbxo7,Foxo4,Cdc20,Cdk1,Mad2l1bp,Plk1,Ccnb1,Rb1,Zwint,Incenp,Rad21,Gen1,Nuf2,Rfwd3,Aurkb,Orc1,Mad2l1,Cdca8,Spc24,Haspin,Spc25,Tpra1,Cenpe,Rpa2,Fbxo5,Wee1,Blm,Pkmyt1,Zfp207,Nbn,E2f7,Cdc6,Syf2,Ezh2,Trp53,Bard1,Rpl26,Ttk,Ccnd1,Kntc1,Brca1,Pml,Donson,Bub3,Prkdc
CELLULAR MODIFIED AMINO ACID METABOLIC PROCESS (GO: BP)	6.56936e-05	0.00425463	0.538434	0.445219	1.7307	161	Hagh,Gch1,Ctsb,Gstt1,Gclm,Gpx1,Ptdss2,Slc16a10,Slc22a4,Chac2,Tyms,Sod2,Serinc1,Tg,Glo1,Hpgds,Gstm1,Dhfr,Acadl,Pla2g15,Crat,Ckb,Mboat2,Icmt,Ctsl,Aldh1l2,Pcmt1,Gstm5,Lpcat3,Gsto1,P4ha3,Abhd16a,Slc5a5,Mmachc,Crot,Slco4a1,Ctsk,Sod1,Cpt1a,Prdx4,Gstp3,Pcyox1,Lipc,Gclc,Mgst2
NEGATIVE REGULATION OF MITOTIC CELL CYCLE (GO: BP)	1.36297e-05	0.00126416	0.593325	0.424078	1.71858	229	Fzr1,Rgcc,Rbm38,Birc5,Fbxo7,Foxo4,Cdc20,Cdk1,Tom1l1,Mad2l1bp,Plk1,Ccnb1,Rb1,Zwint,Incenp,Btg2,Rad21,Chek2,Cdkn1b,Gen1,Map3k20,Nuf2,Rfwd3,Aurkb,Egfr,Orc1,Mad2l1,Cdca8,Spc24,Haspin,Spc25,Tpra1,Cenpe,Tipin,Rpa2,Foxc1,Fbxo5,Wee1,Blm,Pkmyt1,Zfp207,Nbn,Eme2,E2f7,Stk33,Cdc6,Syf2,Ezh2,Trp53,Rpl24,Brinp2,Bard1,Rpl26,Ttk,Ppp1r10,Ccnd1,Rps6,Btg3,Kntc1,Brca1,Pml,Donson,Bub3,Prkdc
CELL CYCLE PHASE TRANSITION (GO: BP)	1.11426e-07	3.06701e-05	0.704976	0.392997	1.71488	512	Fzr1,Cdc25b,Ube2c,Ubd,Psme3,Ppm1d,Rgcc,Rrm2,Cdkn2d,Rbm38,Birc5,Fbxo7,Foxo4,Cdc20,Ccnb2,Ccna2,Diaph3,Ube2s,Ccnf,Cdk1,Aurka,Klf11,Mad2l1bp,Plk1,Atp2b4,Cks1b,Dyrk3,Ccnb1,Rb1,Ccne1,Cdkn2c,Ube2srt,Zwint,Cul4a,Sass6,Incenp,Cks2,Paxip1,Tacc3,Ccnd2,Rad21,Chek2,Cdkn1b,Iqgap3,Calm3,Gen1,Susd2,Map3k20,Nuf2,Mta3,Wdr76,Rfwd3,Cenpf,Pbrm1,Aurkb,Tcf19,Egfr,Orc1,Mad2l1,Cdca8,Spc24,Haspin,Spc25,Aif1,Tpra1,Nfia,Cen…
DNA TEMPLATED DNA REPLICATION (GO: BP)	0.000150612	0.00829121	0.518848	0.439601	1.69658	147	Rpain,Carm1,E2f8,Ccne1,Mcm7,Gins4,Asf1a,Pcna,Orc6,Gen1,Mcm2,Rfwd3,Wdhd1,Orc1,Prim2,Dynll1,Helb,Tipin,Mcm4,Ccne2,Lig1,Rfc4,Gins1,Fbxo5,Blm,Prim1,Rad51,Cdt1,Mcm5,Nbn,Eme2,E2f7,Cdc6,Fgfr1,Chtf18,Rrm1,Orc2,Pole3,Recql,Bard1,Traip,Dbf4,Kat7,Rfc3,Cdk2,Orc4,Wiz,Brca1,Polq,Pola2,Donson,Gins3,Rfc5,Aicda,Mms22l,Cdc45
CHROMOSOME ORGANIZATION (GO: BP)	5.84688e-08	1.73315e-05	0.719513	0.385983	1.69104	538	Gch1,Ube2c,Ube2b,Lmna,Syce2,Birc5,Tal1,Nusap1,Cenpv,Cdc20,H1f0,Mzt1,H3f3a,Mybl2,Cdk1,Pttg1,Mad2l1bp,Plk1,Cltc,Ccnb1,Rb1,Ncapd2,Top1,Dlgap5,Ska2,Cenpk,Oip5,Kif22,Ccne1,Zwint,Pif1,Cenpa,Phf13,Mcm7,Gins4,Gem,Kif2a,Incenp,Tacc3,Pcna,Rnf212,Nek2,Spag5,Rad21,Chek2,Gen1,Nuf2,Mcm2,Tubg1,Pbrm1,Wdhd1,Aurkb,Cip2a,Mad2l1,Cdca8,Tpx2,Ncaph2,Spc24,Haspin,Cenpt,Spc25,Kif18a,Helb,Sub1,Ska1,Kpnb1,Cenpe,Psrc1,Kif18…
REGULATION OF CELL CYCLE PROCESS (GO: BP)	1.25659e-08	4.21066e-06	0.74774	0.379397	1.68636	691	Fzr1,Cdc25b,Ube2c,Ubd,Psme3,Rgcc,Rrm2,Ube2b,Kcnn4,Igf1,Cdkn2d,Rbm38,Birc5,Nusap1,Fbxo7,Cenpv,Foxo4,Gpsm2,Cdc20,Arf6,Diaph3,Ccnf,Cdk1,Aurka,Klf11,Tom1l1,Ppp2r5b,Mad2l1bp,Bcl2l1,Plk1,Atp2b4,Cltc,Dyrk3,Ccnb1,Rb1,Ncapd2,Ect2,E2f8,Ccne1,Cdkn2c,Zwint,Nubp1,Kif20a,Cul4a,Smpd3,Sass6,Azin1,Incenp,Sh3glb1,Paxip1,Tacc3,Nek2,Spag5,Ccnd2,Rad21,Chek2,Cdkn1b,Calm3,Gen1,Susd2,Map3k20,Nuf2,Mta3,Wdr76,Mki67,Rfwd3,…
REGULATION OF MITOTIC CELL CYCLE PHASE TRANSITION (GO: BP)	3.71915e-06	0.000462314	0.627257	0.398906	1.67727	330	Fzr1,Cdc25b,Ube2c,Ubd,Psme3,Rgcc,Rrm2,Cdkn2d,Rbm38,Birc5,Fbxo7,Foxo4,Cdc20,Cdk1,Klf11,Mad2l1bp,Plk1,Ccnb1,Rb1,Ccne1,Cdkn2c,Zwint,Cul4a,Sass6,Incenp,Ccnd2,Rad21,Cdkn1b,Gen1,Nuf2,Mta3,Rfwd3,Cenpf,Pbrm1,Aurkb,Egfr,Orc1,Mad2l1,Cdca8,Spc24,Haspin,Spc25,Aif1,Tpra1,Cenpe,Cdca5,Ccne2,Rpa2,Rad51c,Dpf3,Fbxo5,Wee1,Blm,Pkmyt1,Zfp207,Nbn,Cdc25c,E2f7,Rnaseh2b,Hyal1,Cdc6,Syf2,Ezh2,Rab11a,Trp53,Rad51b,Rrm1,Bard1…
REGULATION OF MITOTIC CELL CYCLE (GO: BP)	4.11091e-07	8.80076e-05	0.674963	0.384273	1.66761	483	Fzr1,Cdc25b,Ube2c,Ubd,Psme3,Lgmn,Rgcc,Rrm2,Igf1,Cdkn2d,Rbm38,Birc5,Tal1,Nusap1,Fbxo7,Foxo4,Cdc20,Cdk1,Klf11,Tom1l1,Mad2l1bp,Plk1,Cks1b,Ccnb1,Rb1,Dlgap5,Ccne1,Cdkn2c,Zwint,Cul4a,Bex4,Smpd3,Sass6,Incenp,Cks2,Btg2,Ccnd2,Rad21,Chek2,Cdkn1b,Gen1,Map3k20,Nuf2,Mta3,Mki67,Rfwd3,Tubg1,Cenpf,Pbrm1,Aurkb,Egfr,Orc1,Mad2l1,Cdca8,Ttll12,Spc24,Asns,Egf,Haspin,Spc25,Aif1,Tpra1,Sdcbp,Pkn2,Cenpe,Tipin,Cdca5,Ccne2,…
NEGATIVE REGULATION OF CELL CYCLE (GO: BP)	3.5986e-06	0.00046224	0.627257	0.393149	1.66608	364	Fzr1,Rgcc,Cdkn2d,Rbm38,Birc5,Hpgd,Plaat3,Fbxo7,Foxo4,Cdc20,Cdk5rap1,Diaph3,Ccnf,Cdk1,Aurka,Tom1l1,Ppp2r5b,Mad2l1bp,Plk1,Ccnb1,Rb1,E2f8,Cdkn2c,Zwint,Nubp1,Cul4a,Incenp,Nek2,Tent5b,Btg2,Rad21,Chek2,Cdkn1b,Gen1,Susd2,Map3k20,Nuf2,Wdr76,Rfwd3,Aurkb,Egfr,Orc1,Mad2l1,Cdca8,Spc24,Haspin,Spc25,Tpra1,Cenpe,Tipin,Trp53bp1,Atf5,Rpa2,Foxc1,Fbxo5,Ccp110,Wee1,Ppp1r13b,Hexim2,Blm,Pkmyt1,Rad51,Cdt1,Zfp207,H2ax,W…
REGULATION OF CELL CYCLE PHASE TRANSITION (GO: BP)	2.43004e-06	0.000353364	0.627257	0.387392	1.6656	419	Fzr1,Cdc25b,Ube2c,Ubd,Psme3,Rgcc,Rrm2,Cdkn2d,Rbm38,Birc5,Fbxo7,Foxo4,Cdc20,Diaph3,Cdk1,Aurka,Klf11,Mad2l1bp,Plk1,Atp2b4,Dyrk3,Ccnb1,Rb1,Ccne1,Cdkn2c,Zwint,Cul4a,Sass6,Incenp,Paxip1,Ccnd2,Rad21,Chek2,Cdkn1b,Gen1,Susd2,Map3k20,Nuf2,Mta3,Wdr76,Rfwd3,Cenpf,Pbrm1,Aurkb,Egfr,Orc1,Mad2l1,Cdca8,Spc24,Haspin,Spc25,Aif1,Tpra1,Cenpe,Tipin,Trp53bp1,Cdca5,Ccne2,Atf5,Rpa2,Rad51c,Fam83d,Dpf3,Fbxo5,Wee1,Blm,Pkmy…
REGULATION OF NUCLEAR DIVISION (GO: BP)	0.00031264	0.0145151	0.498493	0.433633	1.65708	138	Fzr1,Ube2c,Rgcc,Ube2b,Igf1,Birc5,Nusap1,Cdc20,Tom1l1,Mad2l1bp,Plk1,Ccnb1,Rb1,Zwint,Smpd3,Incenp,Rad21,Gen1,Nuf2,Mki67,Tubg1,Aurkb,Mad2l1,Cdca8,Spc24,Egf,Haspin,Spc25,Cenpe,Fbxo5,Zfp207,Sphk1,Pdgfb,Ttk,Cdca2,Anapc11,Anapc5,Lif,Ywhah
ORGANELLE DISASSEMBLY (GO: BP)	0.000396233	0.0168716	0.498493	0.423408	1.65657	163	Gabarapl2,Bnip3l,Map1lc3b,Ulk1,Atg4d,Plaat3,Fbxo7,Atp5if1,Wipi1,Cdk1,Aurka,Gtpbp2,Dyrk3,Atg4a,Atg12,Tspo,Pink1,Sqstm1,Map1lc3a,Wipi2,Fis1,Retreg3,Atg13,Gabarapl1,Lrba,Rnf14,Slc25a5,Rimoc1,Atg4b,Htra2,Pnpla2,Becn1,Fbxl4,Cisd2,Atg9a,Trp53,Plin2,Usp10,Fundc2,Retreg2,Gabarap,Stx5a,Cdkn2a,Atg14,Mcts1,Ascc3,Atg2a
HOMEOSTASIS OF NUMBER OF CELLS (GO: BP)	3.05987e-06	0.000406594	0.627257	0.385861	1.64421	387	Hba-a1,Axl,Cd24a,Smap1,Hmox1,Hbb-bs,Prdx2,Ypel4,Slc48a1,Rhd,Fech,Foxo3,Hscb,Card11,Slc25a38,Epb42,Hba-a2,Alas2,Bpgm,Tal1,Sox6,Trim10,Rhag,Atp5if1,Lmo2,Slc4a1,Zfpm1,Tspo2,Ccnb2,Diaph3,Fam210b,Klf1,Gfi1b,Ank1,Slc11a2,Gata1,Dmtn,Dyrk3,Rb1,Dnase2a,Mafb,Spta1,Cd7,Mfhas1,Gpr183,Mertk,Tnfrsf17,Abcb10,P2ry14,Ankle1,F2r,Add1,Tmem14c,Slc1a5,Isg15,Cd74,Racgap1,Wdr48,Lpcat3,Tgfb2,Ankrd54,Akt3,Slc25a5,Lgr4,Sl…
NEGATIVE REGULATION OF NEURON APOPTOTIC PROCESS (GO: BP)	0.000227871	0.0118663	0.518848	0.408694	1.63864	198	Apoe,Axl,Hmox1,Prdx2,Gclm,Lgmn,Snca,Itsn1,Ucp2,Birc5,Epor,Fbxo7,Cpeb4,Arrb1,Bcl2l1,Sod2,Agtr1a,Pink1,Aars1,Sct,Hras,Cln8,Btg2,Rad21,Hdgf,Fxn,F2r,Hipk2,Prdx3,Vegfb,Unc5b,Fzd9,Mt1,Tgfb3,Cblc,Sod1,Kif14,Slc25a27,Adora2a,Crlf1,Ccnd1,Thap11,Mt3,Lrp1,Gclc,Nfix,Xrcc2,Pcdhgc4,Grn,Sirt1,Pdpk1,Bag1,Pycr1,Bax,Glp1r,Ppargc1a,Prkcg,Foxq1,Tfap2a,Il10,Adnp
REGULATION OF CELL CYCLE (GO: BP)	9.31199e-10	4.48547e-07	0.801216	0.359473	1.62103	989	Fzr1,Tfdp2,Ccndbp1,Cdc25b,Rad23a,Ube2c,Ubd,Psme3,Lgmn,Rgcc,Rrm2,Ube2b,Kcnn4,Igf1,Cdkn2d,Rbm38,Birc5,Pim1,Hpgd,Tal1,Plaat3,Nusap1,Fbxo7,Cenpv,Foxo4,Gpsm2,Cdc20,Cdk5rap1,Ccnb2,Ccna2,Cdkn3,Arf6,Diaph3,Ccnf,E2f4,Cdk1,Aurka,Klf11,Gadd45a,Fntb,Tom1l1,Ppp2r5b,Mad2l1bp,Bcl2l1,Plk1,Atp2b4,Cks1b,Cltc,Dyrk3,Btrc,Ccnb1,Rb1,Ncapd2,Dlgap5,Ect2,E2f8,Ccne1,Cdkn2c,Zwint,Nubp1,Kif20a,E2f2,Cul4a,Bex4,Smpd3,Sass6,Az…
REGULATION OF CHROMOSOME ORGANIZATION (GO: BP)	0.000264139	0.0132616	0.498493	0.392596	1.60707	237	Gch1,Ube2c,Lmna,Birc5,Tal1,Cenpv,Cdc20,H3f3a,Cdk1,Mad2l1bp,Plk1,Ccnb1,Rb1,Ncapd2,Zwint,Pif1,Incenp,Tacc3,Nek2,Rad21,Gen1,Nuf2,Mcm2,Pbrm1,Wdhd1,Aurkb,Mad2l1,Cdca8,Spc24,Haspin,Spc25,Sub1,Cenpe,Cit,Numa1,Dpf3,Fbxo5,Mcph1,Cct7,Ncaph,Zfp207,Smc2,Wapl,Nbn,Becn1,Cdc6,Pphln1,Trp53,Terf2,Slx1b,Ino80b,Ttk,Smarca5,Ppp1r10,Hecw2,Anapc11,Anapc5,Pot1a,Smc4,Cdk2,Hnrnpa2b1,Tcp1,Kntc1,Sfpq,Pml
MONOATOMIC ION HOMEOSTASIS (GO: BP)	2.72645e-06	0.000370145	0.627257	0.365373	1.60025	533	Apoe,Hmox1,Car2,Ghitm,Rhd,Fech,Snca,Creg1,Ccl5,Grina,Epb42,Iscu,Ank,Eif2ak1,Alas2,Rhag,Slc4a1,Kcnj10,Pdk2,Tfrc,Fth1,Trf,Kel,Ank1,Slc11a2,Tmc8,Ibtk,Slc30a9,Atp2b4,Tmem9,Picalm,Slc25a23,Xk,Aplp2,Tgm2,Chp2,Cxcl9,Prnp,Sod2,Nubp1,Tmem64,Ftl1,Agtr1a,Ankrd9,Selenok,Cox11,Erfe,Cnnm2,Cacna1s,Chp1,Pacs2,Ccl8,Letm1,Atp6v0a1,Slc30a1,Atp5f1b,Calm3,Herpud1,Ddit3,Comt,Fxn,F2r,Ckb,Fis1,Aco1,Atp1a1,Tbxas1,Spp1,Sm…
MYELOID CELL DIFFERENTIATION (GO: BP)	9.87593e-06	0.000999126	0.593325	0.36844	1.59303	449	C1qc,Hba-a1,Smap1,Hbb-bs,Ypel4,Ubd,Slc48a1,Car2,Rhd,Fech,Foxo3,Hscb,Blvrb,Ccl5,Slc25a38,Epb42,Hba-a2,Ucp2,Eif2ak1,Prxl2a,Alas2,Bpgm,Tal1,Sox6,Trim10,Rhag,Atp5if1,Lmo2,Slc4a1,Zfpm1,Maf,Tspo2,Tfrc,Pik3r1,Diaph3,Trf,Fam210b,Klf1,Gfi1b,Pithd1,Ank1,Slc11a2,Gata1,Dmtn,Dyrk3,Pabpc4,Rb1,Dnase2a,Mafb,Mturn,Hmgb3,Pir,Fam20c,Tmem64,Mfhas1,Gpr183,Glo1,Cul4a,Erfe,Abcb10,Lbr,Ankle1,Gnas,Sh3pxd2a,Tlr4,Add1,Tmem…
CELL CYCLE PROCESS (GO: BP)	1.60882e-10	8.85658e-08	0.826657	0.350627	1.5927	1178	Fzr1,Cdc25b,Ube2c,Ubd,Psme3,Ppm1d,Rgcc,Rrm2,Ube2b,Lmna,Kcnn4,Spire1,Syce2,Ubb,Igf1,Cdkn2d,Rbm38,Birc5,Rec114,Nusap1,Fbxo7,Cenpv,Foxo4,Gpsm2,Cdc20,Ccnb2,Ccna2,Mzt1,Mybl2,Arf6,Diaph3,Ube2s,Ccnf,Cdk1,Aurka,Klf11,Pttg1,Gadd45a,Tom1l1,Ppp2r5b,Mad2l1bp,Bcl2l1,Plk1,Atp2b4,Slc16a1,Haus4,Cks1b,Cltc,Dyrk3,Ccnb1,Rb1,Ncapd2,Ssx2ip,Top1,Dlgap5,Ect2,Ska2,Cenpk,Oip5,E2f8,Kif22,Ccne1,Cdkn2c,Ube2srt,Zwint,Nubp1,K…
PROTEASOMAL PROTEIN CATABOLIC PROCESS (GO: BP)	8.84461e-06	0.000921155	0.593325	0.361748	1.57439	502	Apoe,Fzr1,Dcaf12,Gabarapl2,Dnajb2,Rad23a,Ube2c,Psme3,Gpx1,Psmf1,Rnf10,Ube2b,Ube2h,Ubb,Otud5,Derl3,Fbxo7,Ube2j1,Cdc20,Wdr26,Fbxo9,Ube2s,Oaz1,Ccnf,Pithd1,Aurka,Arrb1,Alad,Plk1,Yod1,Rnf187,Btrc,Rnf145,Ube2srt,Spsb3,Ankrd9,Cul4a,Tmem129,Rmnd5a,Trim63,Clgn,Nub1,Aup1,Herpud1,Ddit3,Gid8,Fbxl20,Tmx1,Dnajb9,Wwp2,Klhdc2,Ubxn1,Fbxl9,Pmp22,Ube2a,Usp7,Dnajb12,Man1a,Rcn3,Trim26,Asb2,Amfr,Nploc4,Marchf6,Sumo1,P…
PROTEOLYSIS INVOLVED IN PROTEIN CATABOLIC PROCESS (GO: BP)	8.53233e-07	0.000160387	0.659444	0.353347	1.57245	715	Ctsf,Apoe,Fzr1,Ctsb,Dcaf12,Gabarapl2,Dnajb2,Rad23a,Ube2c,Ubd,Psme3,Gpx1,Rnf123,Lgmn,Psmf1,Rnf10,Ube2b,Ube2r2,Ube2h,Ubb,Ube2l6,Otud5,Derl3,Rnf11,Fbxo7,Atp5if1,Ube2j1,Cdc20,Wdr26,Fbxo9,Klhl25,Ube2s,Oaz1,Ccnf,Pithd1,Aurka,Arrb1,Alad,Plk1,Yod1,Rnf187,Btrc,Rnf145,Ube2srt,Spsb3,Ankrd9,Cul4a,Wdr81,Tmem129,Rmnd5a,Trim63,Rnf26,Clgn,Nub1,Ubap1,Aup1,Herpud1,Ddit3,Gid8,Fbxl20,Map3k1,Tmx1,Dnajb9,Wwp2,Klhdc2,E…
CHEMICAL HOMEOSTASIS (GO: BP)	8.99278e-08	2.56694e-05	0.704976	0.349302	1.57116	908	Apoe,Cd24a,Hmox1,Car2,Ghitm,Fabp4,Adipor1,Rhd,Glul,Vcam1,Gpx1,Slc2a4,Fech,Foxo3,Snca,Creg1,Ccl5,Grina,Abhd4,Epb42,Iscu,Igf1,Ucp2,Hectd4,Abcb4,Birc5,Ank,Eif2ak1,Alas2,Adissp,Rhag,Slc4a1,Kcnj10,Pdk2,Tfrc,Fth1,Pik3r1,Aqp1,Trf,Kel,Arrb1,Ank1,Slc11a2,Tmc8,Ibtk,Slc30a9,Ormdl3,Atp2b4,Slc16a1,Mpc2,Tmem9,Picalm,Slc25a23,Xk,Aplp2,Tgm2,Chp2,Tlcd1,Cxcl9,Adcy6,Prnp,Sod2,Nubp1,Tmem64,Tspo,Ftl1,Agtr1a,Ankrd9,Se…
CELL CYCLE (GO: BP)	4.25834e-12	7.08635e-09	0.887075	0.339658	1.5536	1626	Fzr1,Tfdp2,Ccndbp1,Cdc25b,Rad23a,Ube2c,Ubd,Ppp1cb,Psme3,Ppm1d,Pms2,Tuba1c,Lgmn,Rgcc,Rrm2,Ube2b,Lmna,Kcnn4,Spire1,Syce2,Ubb,Igf1,Cdkn2d,Rbm38,Birc5,Pim1,Hpgd,Tal1,Rec114,Plaat3,Nusap1,Fbxo7,Cenpv,Foxo4,Gpsm2,Cdc20,Cdk5rap1,Epb41,Ccnb2,Ccna2,Cdkn3,Mzt1,Mybl2,Cdca3,Arf6,Diaph3,Ube2s,Ccnf,E2f4,Cdk1,Aurka,Klf11,Pttg1,Gadd45a,Fntb,Tom1l1,Ppp2r5b,Stradb,Mad2l1bp,Bcl2l1,Plk1,Atp2b4,Slc16a1,Haus4,Cks1b,Cl…
DNA REPLICATION (GO: BP)	0.000364328	0.0159757	0.498493	0.377683	1.55157	261	Brpf3,Rpain,Ccna2,Carm1,Cdk1,Top1,E2f8,Ccne1,Pif1,Rbbp4,Mcm7,Gins4,Asf1a,Pcna,Hras,Orc6,Gen1,Mcm2,Rfwd3,Wdhd1,Egfr,Orc1,Prim2,Dynll1,Helb,Nfia,Tipin,Mcm4,Esco2,Ccne2,Rpa2,Lig1,Rfc4,Gins1,Rnaseh2a,Fbxo5,Blm,Prim1,Rad51,Cdt1,Mcm5,Wapl,Supt16,Nbn,Eme2,E2f7,Pdgfb,Cdc6,Fgfr1,Chtf18,Trp53,Rrm1,Orc2,Pole3,Recql,Bard1,Rpa1,Ino80b,Smarca5,Traip,Dbf4,Kat7,Chaf1b,Rfc3,Cdk2,Orc4,Wiz,Chaf1a,Brca1,Nfix,Polq,Po…
RESPONSE TO REACTIVE OXYGEN SPECIES (GO: BP)	0.00154639	0.0454886	0.45506	0.390197	1.54368	183	Gch1,Axl,Cat,Hmox1,Prdx2,Txnrd2,Gpx1,Foxo3,Ucp2,Epor,Slc4a1,Cd36,Pdk2,Aqp1,Nqo1,Ccs,Ect2,Sod2,Smpd3,Pink1,Dhfr,Oser1,Fxn,Egfr,Prdx3,Net1,Lig1,Pcgf2,Sphk1,Cryab,Hyal1,Ezh2,Trp53,Plekha1,Rlig1,Apod,Sod1,Pld2,Mt3,Hyal2,Fancc,Kpna4,Agap3,Cdkn2a,Cyp1b1,Sesn1,Abcc9,Nudt15,Fer,Sirt1
MICROTUBULE CYTOSKELETON ORGANIZATION (GO: BP)	2.1638e-05	0.00179316	0.57561	0.346361	1.52725	598	Ranbp10,Tuba1c,Ube2b,Snca,Lmna,Spire1,Birc5,Nusap1,Gpsm2,Cdc20,Ccnb2,Mzt1,Mybl2,Diaph3,Ccnf,Cdk1,Aurka,Gadd45a,Plk1,Slc16a1,Haus4,Cltc,Cdc42bpa,Ccnb1,Camsap2,Spef1,Ssx2ip,Tbcel,Dlgap5,Ska2,Tubb4b,Nubp1,Kif20a,Cenpa,Sass6,Ninl,Dclk2,Azin1,Kif2a,Incenp,Tacc3,Chp1,Tubb5,Nek2,Spag5,Chek2,Cdkn1b,Gen1,Dvl1,Nuf2,Tubg1,Cep76,Tuba4a,Kif4,Cep85,Aurkb,Poc1a,Mad2l1,Cdca8,Tpx2,Dnajb13,Spc25,Kif18a,Ska1,Kpnb1,…
MULTICELLULAR ORGANISMAL LEVEL HOMEOSTASIS (GO: BP)	3.79838e-06	0.000464668	0.627257	0.333937	1.49764	816	Apoe,Hba-a1,Axl,Cd24a,Smap1,Hmox1,Hbb-bs,Prdx2,Ypel4,Slc48a1,Car2,Fabp4,Adipor1,Rhd,Gpx1,Fech,Foxo3,Bsg,Hscb,Card11,Ccl5,Slc25a38,Epb42,Hba-a2,Ubb,Ucp2,Ank,Eif2ak1,Alas2,Bpgm,Tal1,Sox6,Trim10,Rhag,Atp5if1,Lmo2,Slc4a1,Zfpm1,Cd36,Tspo2,Ccnb2,Tfrc,Aqp1,Diaph3,Trf,Fam210b,Klf1,Gfi1b,Ank1,Slc11a2,Gata1,Clcn3,Aldh1a1,Dmtn,Dyrk3,Rb1,Picalm,Dnase2a,Mafb,Adcy6,Sod2,Tmem64,Spta1,Cd7,Mfhas1,Gpr183,Ache,Lpca…
INORGANIC ION HOMEOSTASIS (GO: BP)	0.000270056	0.0132616	0.498493	0.342656	1.48349	461	Apoe,Hmox1,Ghitm,Rhd,Fech,Snca,Ccl5,Grina,Epb42,Iscu,Ank,Eif2ak1,Alas2,Rhag,Kcnj10,Tfrc,Fth1,Trf,Kel,Ank1,Slc11a2,Tmc8,Ibtk,Slc30a9,Atp2b4,Picalm,Slc25a23,Xk,Aplp2,Tgm2,Cxcl9,Prnp,Sod2,Nubp1,Tmem64,Ftl1,Ankrd9,Selenok,Erfe,Cnnm2,Cacna1s,Pacs2,Ccl8,Letm1,Slc30a1,Calm3,Herpud1,Ddit3,Comt,Fxn,F2r,Ckb,Fis1,Aco1,Atp1a1,Tbxas1,Spp1,Smdt1,Rmdn3,Slc30a2,Stoml2,Hcrtr2,Kctd7,Tmtc2,Ndfip1,Wnk1,Tgfb2,Gsto1,C…
PROTEASOME MEDIATED UBIQUITIN DEPENDENT PROTEIN CATABOLIC PROCESS (GO: BP)	0.000502819	0.0199754	0.477271	0.349974	1.48297	372	Fzr1,Dcaf12,Dnajb2,Rad23a,Ube2c,Psmf1,Rnf10,Ube2b,Ube2h,Otud5,Fbxo7,Cdc20,Wdr26,Fbxo9,Ube2s,Ccnf,Aurka,Arrb1,Plk1,Rnf187,Btrc,Rnf145,Ube2srt,Spsb3,Ankrd9,Cul4a,Rmnd5a,Trim63,Nub1,Ddit3,Gid8,Fbxl20,Wwp2,Klhdc2,Ubxn1,Fbxl9,Pmp22,Ube2a,Usp7,Trim26,Asb2,Marchf6,Sumo1,Psmd4,Siah1a,Pcnp,Fbxo3,Psma5,Psmb7,Psmc4,Usp14,Fbxl4,Akirin2,Bag2,Trib2,Rnf139,Trim3,Fbxl7,Psmd8,Kif14,Pbk,Fbxl3,Anapc11,Anapc5,Bag6,F…
REGULATION OF NEURON APOPTOTIC PROCESS (GO: BP)	0.00106052	0.0344871	0.45506	0.354102	1.47299	296	Apoe,Gch1,Axl,Hmox1,Prdx2,Gclm,Lgmn,Snca,Itsn1,Ubb,Ucp2,Birc5,Epor,Fbxo7,Cpeb4,Mybl2,Arrb1,Bcl2l1,Nqo1,Prnp,Sod2,Agtr1a,Bbc3,Pink1,Aars1,Sct,Hras,Cln8,Btg2,Rad21,Ddit3,Hdgf,Fxn,F2r,Fis1,Hipk2,Prdx3,Ager,Vegfb,Tgfb2,Casp9,Unc5b,Fzd9,Mt1,Tgfb3,Cblc,Bcl2l11,Trp53,Sod1,Kif14,Slc25a27,Adora2a,Cdk5r1,Crlf1,Ccnd1,Thap11,Mt3
MODIFICATION DEPENDENT MACROMOLECULE CATABOLIC PROCESS (GO: BP)	0.000143326	0.00806289	0.518848	0.334197	1.46709	579	Fzr1,Dcaf12,Dnajb2,Rad23a,Ube2c,Ubd,Rnf123,Psmf1,Rnf10,Ube2b,Ube2r2,Ube2h,Ubb,Ube2l6,Otud5,Rnf11,Fbxo7,Cdc20,Wdr26,Fbxo9,Klhl25,Ube2s,Ccnf,Aurka,Arrb1,Plk1,Rnf187,Btrc,Rnf145,Ube2srt,Spsb3,Ankrd9,Cul4a,Wdr81,Tmem129,Rmnd5a,Trim63,Rnf26,Nub1,Ubap1,Herpud1,Ddit3,Gid8,Fbxl20,Map3k1,Wwp2,Klhdc2,Egf,Fbxo8,Hipk2,Ubxn1,Fbxl9,Pmp22,Ube2a,Usp7,Trim26,Isg15,Asb2,Hace1,Rnf19a,Amfr,Rnf14,Nploc4,Marchf6,Ubl7,…
HOMEOSTATIC PROCESS (GO: BP)	1.08519e-08	3.80161e-06	0.74774	0.320565	1.46568	1588	Apoe,Hba-a1,Axl,Cd24a,Smap1,Hmox1,Hbb-bs,Ube2c,Prdx2,Ypel4,Slc48a1,Car2,Txnrd2,Ghitm,Fabp4,Adipor1,Rhd,Glul,Vcam1,Gpx1,Slc2a4,Fech,Foxo3,Bsg,Snca,Hscb,Card11,Creg1,Ccl5,Grina,Slc25a38,Kcnn4,Abhd4,Epb42,Hba-a2,Ubb,Iscu,Igf1,Ucp2,Hectd4,Abcb4,Birc5,Ank,Eif2ak1,Alas2,Bpgm,Tal1,Adissp,Sox6,Trim10,Rhag,Atp5if1,Lmo2,Slc4a1,Kcnj10,Zfpm1,Cd36,Pdk2,Tspo2,Ccnb2,Tfrc,Fth1,Pik3r1,Aqp1,Diaph3,Trf,Fam210b,Ube2…
CELLULAR HOMEOSTASIS (GO: BP)	4.22306e-05	0.00309973	0.557332	0.327522	1.45847	731	Apoe,Hmox1,Ube2c,Prdx2,Car2,Txnrd2,Ghitm,Glul,Vcam1,Gpx1,Snca,Creg1,Ccl5,Grina,Kcnn4,Iscu,Igf1,Ucp2,Birc5,Ank,Alas2,Rhag,Slc4a1,Tfrc,Fth1,Pik3r1,Aqp1,Trf,Ube2s,E2f4,Kel,Arrb1,Slc11a2,Tmc8,Clcn3,Ibtk,Slc30a9,Ormdl3,Atp2b4,Mpc2,Tmem9,Picalm,Slc25a23,Xk,Aplp2,Tgm2,Cxcl9,Ube2srt,Prnp,Sod2,Nubp1,Tmem64,Ftl1,Ankrd9,Selenok,Cox11,Erfe,Cacna1s,Sct,Chp1,Pacs2,Ccl8,Letm1,Atp6v0a1,Slc30a1,Atp5f1b,Eny2,Calm3…
ORGANIC ANION TRANSPORT (GO: BP)	0.00119433	0.0377241	0.45506	0.34554	1.45288	330	Slc25a39,Apoe,Slc6a9,Fabp4,Abcg2,Slc2a4,Snca,Slc25a38,Ucp2,Abcb4,Ank,Slc16a10,Slc38a5,Slc4a1,Kcnj10,Cd36,Tspo2,Slco2b1,Slc7a5,Slc3a2,Slc43a1,Slc16a1,Ttyh2,Mpc2,Cd47,Slc25a23,Gfap,Abcc3,Erfe,Irs2,Slc7a8,Slc6a20a,Cln8,Slc25a21,Mfsd12,Fis1,Pnpla8,Slc16a6,Slc35b1,Slc1a5,Abat,Crabp2,Slc2a8,Slc7a2,Lrrc8a,Slc43a2,Slc23a1,Slc25a5,Fabp5,Lrrc8b,Slc6a8,Plin2,Crot,Slco4a1,Slc1a3,Slc26a1,Slc4a8,Slc22a20,Adora…
CELLULAR RESPONSE TO STRESS (GO: BP)	8.85427e-07	0.000162476	0.659444	0.30519	1.39839	1707	Apoe,Gch1,Fzr1,Axl,Cat,Hmox1,Gabarapl2,Dnajb2,Rad23a,Hbb-bs,Prdx2,Bnip3l,Glul,Map1lc3b,Ppm1d,Pms2,Slc2a4,Fech,Rgcc,Foxo3,Ube2b,Snca,Lmna,Grina,Spire1,Ulk1,Cdkn2d,Rbm38,Eif2ak1,Bpgm,Derl3,Serinc3,Rpain,Atp5if1,Foxo4,Ube2j1,Ppp1r15a,Mtmr3,Cpeb4,Cd36,Pdk2,Dyrk1b,Cdkn3,Tmem33,Pik3r1,Aqp1,Gps2,Wipi1,Map2k3,Srxn1,Cdk1,Dnajb1,Crhbp,Pttg1,Gadd45a,Slc11a2,Bcl2l1,Plk1,Nqo1,Dyrk3,Yod1,Slc25a23,Gfap,Pnp,Rrag…
PROTEIN MODIFICATION BY SMALL PROTEIN CONJUGATION (GO: BP)	0.000672461	0.0252756	0.477271	0.314838	1.39826	657	Fzr1,Dnajb2,Ube2c,Ubd,Marchf5,Marchf8,Rnf123,Rnf10,Ivns1abp,Ube2b,Ubac1,Ube2r2,Ube2h,Ubb,Ube2l6,Birc5,Mkrn1,Trim10,Rnf11,Fbxo7,Ube2j1,Cdc20,Marchf2,Fbxo9,Klhl25,Gps2,Ube2s,Ccnf,Arrb1,Svbp,Plk1,Ube2o,Nqo1,Rnf187,Btrc,Ube2e3,Ube2srt,Tspo,Ube2t,Ankrd9,Cul4a,Bex4,Pink1,Tmem129,Sqstm1,Paxip1,Trim63,Rnf212,Chp1,Rnf26,Asb1,Hmg20b,Nub1,Herpud1,Rfwd3,Map3k1,Wwp2,Mad2l1,Ube2f,Eipr1,Rnf38,Ubxn1,Ube2a,Rnf113…
CELLULAR COMPONENT DISASSEMBLY (GO: BP)	0.00141827	0.0426976	0.45506	0.32215	1.39756	476	C1qc,C1qb,Cd24a,C1qa,Gabarapl2,Tmod1,Bnip3l,Map1lc3b,Ulk1,Atg4d,Plaat3,Fbxo7,Atp5if1,Sptb,Pik3r1,Arf6,Diaph3,Wipi1,Cdk1,Aurka,Dedd2,Plk1,Dmtn,Gtpbp2,Dyrk3,Cd47,Camsap2,Spef1,Dnase2a,Add2,Atg4a,Spta1,Atg12,Tpm1,Tspo,Pink1,Sqstm1,Adrb2,Map1lc3a,Napa,Synj1,Wipi2,Mical3,Eef2k,Add1,Tpx2,Fis1,Kif18a,Atad2,Retreg3,Atg13,Gabarapl1,Kif18b,Lrba,Dysf,Eif5a2,Rnf14,Wnk1,Katnb1,Tgfb2,Dnase1l3,Slc25a5,Rimoc1,At…
MICROTUBULE BASED PROCESS (GO: BP)	0.000286027	0.013692	0.498493	0.310453	1.39227	848	Ranbp10,Tuba1c,Ube2b,Snca,Trak2,Lmna,Spire1,Ubb,Birc5,Tac2,Nusap1,Gpsm2,Cdc20,Ccnb2,Mzt1,Mybl2,Diaph3,Ift140,Ccnf,Cdk1,Aurka,Gadd45a,Plk1,Atp2b4,Slc16a1,Haus4,Cltc,Cdc42bpa,Memo1,Ccnb1,Camsap2,Spef1,Ssx2ip,Tbcel,Dlgap5,Ska2,Tubb4b,Kif22,Nubp1,Kif20a,Cenpa,Erbb2,Sass6,Ninl,Dclk2,Azin1,Kif2a,Incenp,Tacc3,Chp1,Tubb5,Rabgef1,Nek2,Spag5,Chek2,Cdkn1b,Gen1,Dvl1,Cacna1e,Nuf2,Ly6k,Tubg1,Cep76,Tuba4a,Kif4,…
PROTEIN CATABOLIC PROCESS (GO: BP)	0.000110741	0.0066161	0.538434	0.308587	1.38932	950	Ctsf,Apoe,Fzr1,Ctsb,Dcaf12,Gabarapl2,Dnajb2,Rad23a,Ube2c,Ubd,Bnip3l,Psme3,Gpx1,Rnf123,Lgmn,Psmf1,Rnf10,Ube2b,Snca,Ube2r2,Ube2h,Ubb,Ube2l6,Otud5,Derl3,Rnf11,Fbxo7,Atp5if1,Ube2j1,Cdc20,Marchf2,Wdr26,Fbxo9,Klhl25,Odc1,Ube2s,Oaz1,Ccnf,Pithd1,Aurka,Arrb1,Alad,Plk1,Nqo1,Yod1,Rnf187,Btrc,Tmem9,Rnf145,Gfap,Ube2srt,Spsb3,Ankrd9,Cul4a,Lpcat1,Ctsd,Timp1,Wdr81,Tmem129,Sqstm1,Azin1,Rmnd5a,Trim63,Cln8,Rnf26,Cl…
HEMOPOIESIS (GO: BP)	0.000276827	0.0133344	0.498493	0.303978	1.36934	969	C1qc,Hba-a1,Axl,Cd24a,Smap1,Hbb-bs,Prdx2,Ypel4,Ubd,Slc48a1,Car2,Txnrd2,Rhd,Fech,Foxo3,Hscb,Mllt3,Blvrb,Card11,Ccl5,Slc25a38,Epb42,Hba-a2,Ucp2,Pim1,Epor,Eif2ak1,Prxl2a,Brpf3,Alas2,Otud5,Bpgm,Tal1,Sox6,Trim10,Fbxo7,6030468B19Rik,Rhag,Atp5if1,Lmo2,Slc4a1,Zfpm1,Maf,Tspo2,Sptb,Tfrc,Klhl25,Pik3r1,Diaph3,Ap2a2,Gps2,Trf,Fam210b,Crip2,Klf1,Gfi1b,Pithd1,Klf11,Ank1,Slc11a2,Gata1,Dmtn,Dyrk3,Cd8a,Pabpc4,Rb1,P…
POST TRANSLATIONAL PROTEIN MODIFICATION (GO: BP)	0.00101478	0.0331394	0.45506	0.302572	1.35626	817	Fzr1,Dnajb2,Ube2c,Ubd,Marchf5,Marchf8,Rnf123,Rnf10,Ivns1abp,Ube2b,Ubac1,Ube2r2,Ube2h,Ubb,Ube2l6,Birc5,Mkrn1,Otud5,Usp32,Trim10,Rnf11,Atg4d,Fbxo7,Ube2j1,Cdc20,Marchf2,Fbxo9,Klhl25,Ccna2,Gps2,Ube2s,Ccnf,Arrb1,Svbp,Plk1,Ube2o,Nqo1,Yod1,Rnf187,Btrc,Ube2e3,Atg4a,Josd2,Ube2srt,Parp16,Atg12,Tspo,Ube2t,Ankrd9,Cul4a,Bex4,Pink1,Tmem129,Sqstm1,Paxip1,Trim63,Rnf212,Chp1,Wipi2,Rnf26,Asb1,Hmg20b,Nub1,Usp49,Her…
TRANSMEMBRANE TRANSPORT (GO: BP)	0.000407017	0.017125	0.498493	0.291333	1.32031	1159	Slc25a39,Slc6a9,Slc48a1,Car2,Ghitm,Rhd,Abcg2,Slc2a4,Slc25a51,Snca,Slc25a37,Slc25a38,Kcnn4,Iscu,Igf1,Ucp2,Abcb4,Pim1,Tmc6,Ank,Sec62,Stom,Rhag,Slc16a10,Slc38a5,Slc4a1,Kcnj10,Cd36,Tspo2,Aqp1,Slc22a4,Oaz1,Crhbp,Kel,Slco2b1,Slc7a5,Ank1,Slc11a2,Tmc8,Clcn3,Ibtk,Slc30a9,Slc43a3,Slc3a2,Slc43a1,Atp2b4,Slc16a1,Ttyh2,Mpc2,Slc25a23,Gfap,Chp2,Cxcl9,Slc15a2,Cacna1g,Prnp,Slc22a23,Rap1a,Slc14a1,Abcc3,Agtr1a,Erfe,…
ORGANONITROGEN COMPOUND CATABOLIC PROCESS (GO: BP)	0.000270153	0.0132616	0.498493	0.288637	1.31347	1286	Ctsf,Apoe,Fzr1,Ctsb,Dcaf12,Hmox1,Gabarapl2,Dnajb2,Rad23a,Urod,Ube2c,Nt5c3,Ubd,Bnip3l,Psme3,Gpx1,Rnf123,Lgmn,Psmf1,Rnf10,Ube2b,Snca,Blvrb,Smox,Ube2r2,Ube2h,Ubb,Igf1,Pnp2,Ucp2,Ube2l6,Acmsd,Otud5,Bpgm,Derl3,Rnf11,Fbxo7,Atp5if1,Ube2j1,Cdc20,Marchf2,Slc4a1,Wdr26,Fbxo9,Klhl25,Odc1,Ube2s,Oaz1,Ccnf,Nudt19,Pithd1,Chac2,Aurka,Arrb1,Auh,Alad,Plk1,Atp2b4,Gpd1,Nqo1,Yod1,Rnf187,Btrc,Tmem9,Rnf145,Gfap,Pnp,Bckdh…
MACROMOLECULE CATABOLIC PROCESS (GO: BP)	0.000920617	0.0310662	0.477271	0.282293	1.28589	1313	Ctsf,Apoe,Fzr1,Ctsb,Dcaf12,Gabarapl2,Dnajb2,Rad23a,Ube2c,Ubd,Ppp1cb,Bnip3l,Psme3,Gpx1,Rnf123,Pabpc1,Lgmn,Psmf1,Rnf10,Ube2b,Snca,Ube2r2,Ube2h,Ubb,Rbm38,Ube2l6,Otud5,Derl3,Rnf11,Fbxo7,Isg20,Atp5if1,Ube2j1,Cdc20,Marchf2,Wdr26,Carhsp1,Fbxo9,Klhl25,Odc1,Tent5c,Ube2s,Oaz1,Wipi1,Ccnf,Pithd1,Aurka,Arrb1,Alad,Plk1,Nqo1,Gtpbp2,Yod1,Rnf187,Btrc,Tmem9,Rnf145,Pabpc4,Gfap,Dnase2a,Ube2srt,Spsb3,Atg12,Ankrd9,Cul…
PROTEOLYSIS (GO: BP)	0.00082531	0.0287112	0.477271	0.279114	1.27493	1462	Ctsf,Apoe,Fzr1,Ctsb,Dcaf12,Tinagl1,Cd5l,Gabarapl2,Dnajb2,Rad23a,Ube2c,Ubd,Psme3,Gpx1,Mmel1,Cldn13,Rnf123,Lgmn,Psmf1,Rnf10,Ube2b,Snca,Ube2r2,Nrip3,Ube2h,Ubb,Cdkn2d,Ube2l6,Birc5,Stfa1,Otud5,Usp32,Derl3,Capn5,Rnf11,Atg4d,Fbxo7,Atp5if1,Ube2j1,Ppp1r15a,Cdc20,Sppl2b,Wdr26,Fbxo9,Klhl25,Pik3r1,Aqp1,Serpina3g,Ube2s,Oaz1,Ccnf,Pithd1,Kel,Aurka,Arrb1,Slc11a2,Apeh,Bcl2l1,Ctse,Svbp,Alad,Plk1,Yod1,Rnf187,Btrc,R…
ORGANONITROGEN COMPOUND BIOSYNTHETIC PROCESS (GO: BP)	0.00124427	0.0388244	0.45506	0.276058	1.26093	1498	Slc25a39,Apoe,Hagh,Gch1,Slc6a9,Urod,Hbb-bs,Hmbs,Gclm,Glul,Pnpo,Fech,Ptdss2,Snca,Slc25a37,Trak2,Hs6st1,Ulk1,Igf1,Pnp2,Eif2ak1,Eif5,Alas2,Acmsd,Derl3,Iba57,Atg4d,Atp5if1,Ube2j1,Ppp1r15a,Cdk5rap1,Pigq,Cpeb4,Pdk2,Sptb,Klhl25,Odc1,Oaz1,Wipi1,Uros,Ppox,Ank1,Slc11a2,Gata1,Bcl2l1,Ormdl3,Alad,Ifrd2,Nadk2,Nmnat3,Atp2b4,Aldh1a1,Cltc,Mpc2,Rfk,Gtpbp2,Pnp,Adcy6,Atg4a,Tyms,Cpox,Parp16,Chst1,Rxra,Spta1,St3gal5,P…
CELL MOTILITY (GO: BP)	0.000370128	0.0161163	0.498493	-0.22619	-1.17486	1581	Cited2,Zmiz1,L1cam,Gata2,Csf3r,Ace,Il1b,Grb7,Mmp9,Hdac4,Insr,Trpm2,Sema4d,Tet1,Iqgap1,Ier2,Tbxa2r,Selplg,Zfp609,Fgr,Il17ra,Cd44,Arhgap4,Ptprc,Fmnl3,Sorl1,Epb41l5,Prkcd,Ppbp,Arrb2,Lyst,Tradd,Pbxip1,Lrrk2,Lcp1,S100a9,Trem3,Elp3,Dock10,Fes,Cx3cr1,Rigi,Gnai2,Cd9,Zeb2,Ccdc125,Arhgap18,Cap1,Nr4a1,Stk10,Irak4,Igf1r,Sema4a,Coro1a,Arpc2,Cxcl2,Diaph1,Reck,Adam15,Vsir,Ripor2,Gpsm3,Rap2a,Was,Abcc1,Pdlim1,Doc…
POSITIVE REGULATION OF GENE EXPRESSION (GO: BP)	0.000466715	0.0192352	0.498493	-0.233062	-1.20586	1118	Cited2,Gata2,Il1b,Ccdc88b,Mmp8,Tet1,Chi3l1,Laptm5,Il36g,Fgr,Il17ra,Cd44,Tnfrsf13c,Ptprc,Sorl1,Macroh2a1,Cd84,Arrb2,Rbpj,Tradd,Lims1,Camp,Lrrk2,Grk2,Nfam1,Runx1,Ybx1,Pou2f2,Rigi,P2rx7,Pkm,Irf8,Rara,Srpk2,Cybb,Vsir,Clec5a,Gpsm3,Dnmt3b,Clec4e,Sirt7,Cd244a,Spn,Il17rb,Lef1,Il33,Rps6ka2,Adam8,Ncl,Mapkapk2,Msn,Rcc1l,Tent5a,Fcer1a,Sgms1os1,Cnn2,Obi1,Gja1,Cd28,Plcg2,Nfil3,Nr0b2,Rbm24,Rasgrp1,Eif4g3,Prkd2,…
POSITIVE REGULATION OF IMMUNE SYSTEM PROCESS (GO: BP)	0.000923078	0.0310662	0.477271	-0.238526	-1.23021	1041	Zmiz1,Trim30b,Gata2,Il1b,Mmp9,Ccdc88b,Mmp8,Pik3r6,Lilrb4b,Laptm5,Zfp609,Ltf,Fgr,Cd79a,Flot2,Cd44,Tnfrsf13c,Ptprc,H2-Q10,Ms4a2,Ppbp,Il18rap,Arrb2,Lyst,Stxbp2,Lrrk2,Nfam1,Runx1,S100a9,Trem3,Fes,Cx3cr1,Clec4d,Rigi,P2rx7,Ubash3a,Tifab,Pik3ap1,Rara,Cd300lf,Gpr108,Rnf144a,Coro1a,Mndal,Smarcd2,Nfkbiz,Tlr13,Vsir,Ripor2,Gpsm3,Trim11,Trem1,Clec4e,Nckap1l,Cd244a,Spn,Fosl1,Hps1,Lef1,Il33,Camk1d,Adam8,Mapkapk…
REGULATION OF RESPONSE TO EXTERNAL STIMULUS (GO: BP)	0.000326119	0.0148722	0.498493	-0.243683	-1.25077	994	Trim30b,Il1b,Cd200r3,Mmp8,Tbxa2r,Mycbp2,Pik3r6,Ltf,Klrb1f,Fgr,Il17ra,Cd44,Cd84,Prkcd,Ppbp,Il18rap,Arrb2,Gp5,Siglece,Tradd,Ggt1,Lrrk2,S100a9,Trem3,Fgl2,Cx3cr1,Samhd1,Rigi,Cd9,Ncf1,Tifab,Pik3ap1,Igf1r,Cd300lf,Gpr108,Rnf144a,Mndal,Alox15,Nfkbiz,Tlr13,Ripor2,Plaur,Gpsm3,Trim11,Lyar,Abcc1,Xylt1,Trem1,Clec4e,Chd8,Nckap1l,Spn,Il17rb,Fosl1,Il33,Camk1d,Adam8,Pde5a,Mapkapk2,Fcer1a,S100a8,Dab2ip,Anxa2,Cd28,…
REGULATION OF DEFENSE RESPONSE (GO: BP)	0.000758173	0.0273049	0.477271	-0.252458	-1.26514	744	Trim30b,Il1b,Cd200r3,Mmp8,Pik3r6,Ltf,Klrb1f,Fgr,Il17ra,Cd44,Il18rap,Arrb2,Siglece,Tradd,Ggt1,Lrrk2,S100a9,Trem3,Fgl2,Cx3cr1,Samhd1,Rigi,Ncf1,Tifab,Pik3ap1,Cd300lf,Gpr108,Rnf144a,Mndal,Alox15,Nfkbiz,Tlr13,Gpsm3,Trim11,Lyar,Abcc1,Clec4e,Spn,Il17rb,Fosl1,Il33,Adam8,Pde5a,Mapkapk2,Fcer1a,S100a8,Dab2ip,Gja1,Cd28,Sirt2,Itch,Plcg2,Rab11fip2,Rasgrp1,Fut7,Syk,Zmpste24,Myo1f,Osm,Oas1a,Foxp1,Rnf170,Cebpb,Pt…
VESICLE MEDIATED TRANSPORT (GO: BP)	1.74581e-05	0.00151891	0.57561	-0.24433	-1.26792	1438	Ncam1,Cux1,Sytl1,Eps15,Tex261,Tmem108,Gata2,Insr,Tmcc1,Neurl3,Rab3d,Siglech,Dennd1c,Lilrb4b,Laptm5,Dnajc6,Fgr,Dennd3,Cd44,Ptprc,Sorl1,Cd84,Ms4a2,Nedd4,Arrb2,Mical1,Sft2d2,Cdc42se1,Siglece,Lyst,Stxbp2,Lrrk2,Grk2,Plek,Ap1s3,Gcc2,Ncf2,Fes,Gnai2,Bnip1,Cd9,P2rx7,Map4k2,Git2,Cap1,Arhgap25,Trappc2l,Milr1,Irf8,Pstpip1,Rara,Def6,Igf1r,Cd300lf,Coro1a,Alox15,Bin1,Rinl,Fnbp1l,Diaph1,Cmtm6,Nrbp1,Lyar,Was,Mvb1…
NUCLEIC ACID CATABOLIC PROCESS (GO: BP)	0.00120699	0.0379684	0.45506	-0.254762	-1.27007	654	Ints10,Ints4,Cpsf3,Rrp1,Mov10,Elp3,Ybx1,Mak16,Trmt61a,Slfn2,Wdr43,Ddx10,Lyar,Elp2,Kri1,Sirt7,Ebna1bp2,Ncl,Mapkapk2,Tsr1,Tent5a,Sgms1os1,Trmt13,Riok1,Pwp2,Gar1,Pes1,Rbm24,Rrp36,Ddx18,Ankrd16,Rrp1b,Rbm34,Dffb,Pus7,Trub2,Exosc7,Rpf2,Rrp9,Fto,Trmt10b,Tnrc6c,Mettl1,Dtwd2,Tirap,Zc3h12a,Prr5l,Wdr12,Smg6,Rrs1,Brix1,Nsun2,Heatr1,Tfb2m,Utp20,Ythdf1,Yrdc,Lrpprc,Rbfa,Thumpd1,Imp4,Rpusd4,Secisbp2,Xrn1,Dicer1,…
REGULATION OF HYDROLASE ACTIVITY (GO: BP)	0.000400912	0.0169771	0.498493	-0.254325	-1.27446	726	Agap1,Gzma,Mmp9,Sema4d,Iqgap1,Cyfip2,Laptm5,Pak2,Ltf,Cd44,Serpinb10,Ngp,Arap3,Ptprc,Slpi,Prkcd,Mical1,Dap,Cst3,Pbxip1,Lims1,Lrrk2,Plek,S100a9,Dock10,Pde3a,Ralgapa1,Ccdc125,Rasgrp2,Arhgap25,Nr4a1,Arhgap45,Psmb8,Bin1,Reck,Vsir,Ripor2,Plaur,Mmut,Plin5,Arhgap9,Atp2a3,Ccl6,Nckap1l,Dvl2,Rgs14,Vcan,Pi16,S100a8,Cry2,Dab2ip,Naip2,Rab11fip2,Rasgrp1,Rrp1b,Syk,Tbc1d1,Tnfsf10,Sipa1l1,Gmip,Bak1,Oas1a,Lars1,Iti…
CELL ADHESION (GO: BP)	3.10943e-05	0.00242064	0.557332	-0.248092	-1.27735	1271	Ncam1,Tjp3,Cited2,Zmiz1,Adgrl1,L1cam,Csf3r,Il1b,Ccdc88b,Sema4d,Iqgap1,Cyfip2,Slc7a11,Siglech,Pik3r6,Lilrb4b,Selplg,Laptm5,Zfp609,Flot2,Cd44,Tnfrsf13c,Ptprc,Epb41l5,Cd84,Prkcd,Gp5,Siglece,Rbpj,Pbxip1,Lims1,Plek,Runx1,S100a9,Zdhhc21,Fes,Fgl2,Cx3cr1,Ass1,Cd9,Ubash3a,Stk10,Pstpip1,Rara,Coro1a,Alox15,Smarcd2,Nfkbiz,Arpc2,Adam15,Vsir,Ripor2,Plaur,Dock5,Trem1,Cass4,Nckap1l,Cd244a,Spn,Lef1,Adam8,Apbb1ip,…
CELL MORPHOGENESIS (GO: BP)	6.09136e-05	0.00411808	0.557332	-0.254698	-1.30499	969	Ncam1,Cux1,Zmym3,L1cam,Tmem108,Unc5a,Sema4d,Tet1,Iqgap1,Cdc42ep2,Cyfip2,Mycbp2,Pak2,Fgr,Vpreb1a,Cd44,Arhgap4,Nbeal2,Fmnl3,Epb41l5,Nedd4,Ttc3,Cdc42se1,Mov10,Cul7,Lrrk2,Pitpna,Dock10,Fes,P2rx7,Zeb2,Arhgap18,Cap1,Igf1r,Sema4a,Coro1a,Nin,Diaph1,Ripor2,Rap2a,Ablim1,Vasp,Parp6,Nckap1l,Hps1,Lef1,Uchl1,Atg7,Adam8,Dnmbp,Msn,Actn1,Trpv2,Flrt2,Rhou,Capzb,Camk2b,Dab2ip,Ccdc88c,Aldoa,Clec1b,Cdh23,Frmd6,Gja1,F…
ACTIN FILAMENT BASED PROCESS (GO: BP)	0.000352465	0.0157933	0.498493	-0.260939	-1.30989	746	Trpm2,Iqgap1,Cdc42ep2,Cyfip2,Limd2,Pak2,Tnnt2,Fgr,Fmnl3,Epb41l5,Fchsd1,Prkcd,Mical1,Plek,Tagln2,Lcp1,S100a9,Zeb2,Taok1,Arhgap18,Cap1,Arhgap25,Pstpip1,Coro1a,Alox15,Bin1,Arpc2,Fnbp1l,Diaph1,Tpm3-rs7,Rap2a,Svil,Was,Tpm3,Pdlim1,Vill,Vasp,Scn4b,Nckap1l,Msrb1,Syne2,Actn1,Ptpn1,Arhgef10l,Cnn2,Rhou,Capzb,Arpc1b,Ccdc88c,Capg,Rala,Frmd6,Gja1,Rflnb,Flna,Tln1,Tmsb4x,Actb,Myo1f,Sipa1l1,Arfip2,Wdr1,Diaph2,Pls…
MONONUCLEAR CELL DIFFERENTIATION (GO: BP)	0.00093499	0.0311947	0.477271	-0.26728	-1.31033	511	Zmiz1,Gata2,Il1b,Gab3,Ly6d,Trpm2,Satb1,Pik3r6,Lilrb4b,Laptm5,Zfp609,Cd79a,Cd44,Ptprc,Rbpj,Nfam1,Runx1,Spib,Zeb1,Dock10,Fes,Fgl2,Clec4d,Pou2f2,Irf8,Rara,Ncor1,Sema4a,Smarcd2,Nfkbiz,Vsir,Clec4e,Nckap1l,Spn,Lef1,Il33,Adam8,Itm2a,Dclre1c,Gba1,Cd28,Fosl2,Itgam,Trib1,Plcg2,Pbx1,Nfil3,Notch2,Rasgrp1,Fut7,Runx3,Syk,Actb,Bak1,Foxp1,Cebpb,Zc3h8,Shb,Ctnnb1,Patz1,Hlx,Nlrp3,Cdk6,Anxa1,Cmtm7,Cebpa,Fcer1g,Zc3h1…
LOCOMOTION (GO: BP)	1.23896e-05	0.00119359	0.593325	-0.254325	-1.31284	1153	Cited2,Gata2,Csf3r,Ace,Il1b,Grb7,Mmp9,Hdac4,Insr,Trpm2,Sema4d,Tet1,Iqgap1,Tbxa2r,Mycbp2,Zfp609,Fgr,Il17ra,Arhgap4,Ptprc,Sorl1,Epb41l5,Prkcd,Ppbp,Arrb2,Rogdi,Lyst,Tradd,Lrrk2,Ear2,S100a9,Trem3,Elp3,Dock10,Fes,Cx3cr1,Rigi,Gnai2,Cd9,Zeb2,Ccdc125,Arhgap18,Nr4a1,Stk10,Igf1r,Sema4a,Coro1a,Arpc2,Cxcl2,Diaph1,Reck,Adam15,Vsir,Ripor2,Gpsm3,Rap2a,Was,Abcc1,Dock5,Ccl6,Trem1,Cass4,Nckap1l,Idh2,Bex6,Spn,Sp100…
IMMUNE RESPONSE REGULATING SIGNALING PATHWAY (GO: BP)	0.000993904	0.0327351	0.45506	-0.272425	-1.31376	453	Lilra6,Lilrb4b,Laptm5,Ltf,Cd79a,Ptprc,Arrb2,Nfam1,S100a9,Clec4d,Rigi,Ubash3a,Tifab,Pik3ap1,Cd300lf,Gpr108,Rnf144a,Nfkbiz,Tlr13,Trim11,Clec4e,Nckap1l,Fosl1,Mapkapk2,S100a8,Dab2ip,Elf1,Cd28,Sirt2,Fosl2,Itgam,Itch,Plcg2,Rab11fip2,Lgals3,Prkd2,Syk,Oas1a,Foxp1,Rnf170,Pten,Hspd1,Lat2,Shb,Stap1,Nlrp3,Prkcb,Tirap,Clpb,Nlrc3,Ddx3x,Fcer1g,Zc3h12a,Themis2,Phb1,Dgkz,Fpr1,Nlrp1b,Trim30a,Zdhhc12,Dhx58,Lrrfip2,…
POSITIVE REGULATION OF CYTOKINE PRODUCTION (GO: BP)	0.00111177	0.0357016	0.45506	-0.271735	-1.3174	475	Il1b,Ccdc88b,Mmp8,Chi3l1,Laptm5,Il36g,Fgr,Il17ra,Tnfrsf13c,Ptprc,Sorl1,Cd84,Tradd,Camp,Lrrk2,Grk2,Nfam1,Runx1,Pou2f2,Rigi,P2rx7,Irf8,Rara,Cybb,Clec5a,Gpsm3,Clec4e,Cd244a,Spn,Il17rb,Il33,Adam8,Ncl,Mapkapk2,Fcer1a,Cd28,Plcg2,Rasgrp1,Prkd2,Syk,Osm,Oas1a,Foxp1,Cebpb,Pten,Chil3,Sptbn1,Hspd1,Nlrp3,Anxa1,Clu,Cd34,Tirap,Ddx3x,Fcer1g,Phb1,Abl2,Nlrp1b,Mapk13,Dhx58,Ccr2,Lrrfip2,Hgf,Oas1g,Il6ra,Irf1,Ccl3,Btk…
POSITIVE REGULATION OF CELL DEVELOPMENT (GO: BP)	0.000408849	0.017125	0.498493	-0.27151	-1.3287	502	Cux1,Zmiz1,L1cam,Ace,Il1b,Sema4d,Pik3r6,Lilrb4b,Zfp609,Ptprc,Arrb2,Cul7,Runx1,Fes,Cx3cr1,Pde3a,Zeb2,Rara,Smarcd2,Nin,Nfkbiz,Bin1,Vsir,Parp6,Nckap1l,Rgs14,Lef1,Il33,Adam8,Vcan,Pde5a,Trpv2,Camk2b,Gja1,Sirt2,Itgam,Trib1,Notch2,Rasgrp1,Runx3,Syk,Actb,Smurf1,Nrp1,Ccr1,Akap11,Zfyve27,Shb,Ctnnb1,Hlx,Plxna4,Nlrp3,Anxa1,Flt1,Cyp51,Bmpr2,Smarca2,Fos,Bcl11a,Ccr2,Ss18l1,Bex1,Dicer1,Metrn,Inpp5d,Ppargc1b,Irf1…
REGULATION OF CELL ACTIVATION (GO: BP)	0.000350024	0.0157756	0.498493	-0.269978	-1.34341	606	Zmiz1,Il1b,Ccdc88b,Mmp8,Pik3r6,Ptpre,Lilrb4b,Laptm5,Zfp609,Fgr,Flot2,Cd44,Tnfrsf13c,Ptprc,Cd84,Prkcd,Gp5,Lyst,Lrrk2,Plek,Nfam1,Sit1,Runx1,Zeb1,Fgl2,Clec4d,Cd9,Milr1,Rara,Cd300lf,Coro1a,Smarcd2,Nfkbiz,Vsir,Ripor2,Nckap1l,Cd244a,Spn,Hps1,Lef1,Il33,Adam8,Pde5a,Iglc4,Cd28,Itch,Flna,Pag1,Lgals3,Rasgrp1,Runx3,Tnfsf14,Sirpb1b,Syk,Actb,Pkn1,Cebpb,Pten,Zc3h8,Cd300lb,Hspd1,Kmt5b,Rassf5,Shb,Stap1,Ctnnb1,Hlx…
RNA PROCESSING (GO: BP)	9.98218e-06	0.000999126	0.593325	-0.26938	-1.35756	874	Ints10,Ints4,Cpsf3,Rp9,Rrp1,Zc3h7a,Elp3,Ybx1,Mak16,Trmt61a,Wdr43,Srpk2,Ddx10,Rbm26,Htatsf1,Lyar,Elp2,Tsnax,Kri1,Chd8,Sirt7,Ebna1bp2,Ncl,Tsr1,Fra10ac1,Arvcf,Thoc3,Trmt13,Rsrc1,Riok1,Obi1,Pwp2,Srek1ip1,Gar1,Pes1,Trrap,Cmtr1,BC005624,Rbm24,Rrp36,Lgals3,Dnajc17,Ddx18,Ankrd16,Rrp1b,Rbm34,Pus7,Zmpste24,Sf3b1,Cwf19l2,Trub2,Exosc7,Rpf2,Rrp9,Zfp326,Srek1,Trmt10b,Mettl1,Dtwd2,Ahnak,Cdc40,Zfp638,Ddx3x,Rbm25…
LEUKOCYTE MIGRATION (GO: BP)	0.00138046	0.0420038	0.45506	-0.290265	-1.36845	353	Csf3r,Il1b,Mmp9,Trpm2,Selplg,Il17ra,Ppbp,Lyst,S100a9,Trem3,Cx3cr1,Cd9,Stk10,Irak4,Coro1a,Cxcl2,Ripor2,Gpsm3,Ccl6,Trem1,Nckap1l,Spn,Il33,Camk1d,Adam8,Msn,S100a8,Itga2b,Cnn2,Gba1,Itgam,Lgals3,Fut7,Tnfsf14,Syk,Myo1f,Itgb2,Wdr1,Ccr1,Cxcr2,Fut4,Stap1,Plec,Cd200r1,Anxa1,Flt1,Trpm4,Cd34,Tirap,Fcer1g,Pf4,Rin3,Abl2,Gp1ba,Ccr2,Vav1,Vav3,Rac2,Itgb2l,Ccl3,Myo1g,Mcu,Cdc42,Pde4b,Il16,Thbs1,Ninj1,Cd200,Hoxa7,Bc…
EXOCYTOSIS (GO: BP)	0.00134935	0.0412676	0.45506	-0.295371	-1.38299	340	Ncam1,Sytl1,Gata2,Rab3d,Fgr,Cd84,Ms4a2,Mical1,Stxbp2,Lrrk2,Plek,Fes,Gnai2,P2rx7,Git2,Milr1,Coro1a,Nckap1l,Fcer1a,Anxa2,Rala,Itgam,Rab11fip2,Rasgrp1,Rab44,Exoc7,Syk,Septin5,Myo1f,Itgb2,Rab27a,Rab11fip5,Rab40c,Ccr1,Rab8a,Lat2,Unc13d,Exoc2,Prkcb,Pip5k1c,Anxa1,Cspg5,Hck,Fcer1g,Rab33b,Ralb,Ccr2,Wdr41,Trim9,Orai1,Rac2,Itgb2l,Vamp1,Myo1g,Sytl4,Btk,Myh9,Bcr,Cops5,Exoc6b,Rab27b,Sytl2,Spi1,Vps18,Scamp1,Pra…
REGULATION OF PROTEIN CONTAINING COMPLEX ASSEMBLY (GO: BP)	0.000644774	0.0247122	0.477271	-0.289098	-1.3831	409	Ncam1,Cdc42ep2,Cyfip2,Dnajc6,Sorl1,Fchsd1,Prkcd,Plek,Lcp1,Fes,Arhgap18,Inpp5j,Coro1a,Alox15,Bin1,Arpc2,Trim11,Svil,Vill,Fkbp4,Vasp,Sec16a,Nckap1l,Msn,Senp6,Capzb,Spidr,Dab2ip,Capg,Gba1,Sirt2,Plcg2,Tppp3,Raf1,Mpp7,Lgals3,Tmsb4x,Syk,Ncln,Bak1,Sptbn1,Akap9,Brk1,Clu,Ice1,Dctn1,Arfgef1,Tirap,Esam,Hck,Nlrc3,Ddx3x,Hip1r,Trim30a,Zdhhc12,Ralb,Capza1,Trim9,Myo1c,Add3,Mtln,Pik3r2,Skap1,Btk,Myh9,Cdc42,Mlst8,…
ACTIN FILAMENT ORGANIZATION (GO: BP)	0.000226542	0.0118663	0.518848	-0.288238	-1.38714	437	Iqgap1,Cdc42ep2,Cyfip2,Limd2,Pak2,Tnnt2,Fchsd1,Prkcd,Mical1,Plek,Tagln2,Lcp1,Zeb2,Arhgap18,Cap1,Arhgap25,Pstpip1,Coro1a,Alox15,Bin1,Arpc2,Diaph1,Tpm3-rs7,Svil,Was,Tpm3,Pdlim1,Vill,Vasp,Nckap1l,Msrb1,Actn1,Arhgef10l,Cnn2,Rhou,Capzb,Arpc1b,Capg,Gja1,Rflnb,Flna,Tmsb4x,Myo1f,Arfip2,Wdr1,Diaph2,Pls1,Zyx,Nrp1,Sptbn1,Mtss1,Kptn,Plec,Myo7a,Brk1,Arfgef1,Esam,Ppfia1,Pxn,Hip1r,Abl2,Capza1,Rac2,Arhgef18,Myo1…
REGULATION OF CELL ADHESION (GO: BP)	1.02936e-05	0.00101709	0.593325	-0.27588	-1.38886	747	Cited2,Zmiz1,L1cam,Il1b,Ccdc88b,Sema4d,Iqgap1,Pik3r6,Lilrb4b,Laptm5,Zfp609,Flot2,Cd44,Tnfrsf13c,Ptprc,Epb41l5,Prkcd,Rbpj,Lims1,Runx1,Zdhhc21,Fes,Fgl2,Ass1,Cd9,Rara,Coro1a,Alox15,Smarcd2,Nfkbiz,Arpc2,Adam15,Vsir,Ripor2,Plaur,Dock5,Trem1,Cass4,Nckap1l,Cd244a,Spn,Lef1,Adam8,Apbb1ip,Pde5a,Iglc4,Cd28,Itch,Flna,Pag1,Lgals3,Il1rn,Rasgrp1,Fut7,Prkd2,Runx3,Tnfsf14,Sirpb1b,Syk,Actb,Myo1f,Itgb2,Cebpb,Pten,N…
ADAPTIVE IMMUNE RESPONSE (GO: BP)	0.000293848	0.0138938	0.498493	-0.28702	-1.39306	465	Csf3r,Il1b,Igll1,Lilrb4b,Cd79a,Il17ra,Cd44,Tnfrsf13c,Ptprc,H2-Q10,Cd84,Prkcd,Nedd4,Il18rap,Lyst,Sit1,Fgl2,Cx3cr1,Clec4d,Pou2f2,P2rx7,Slfn2,Sema4a,Alox15,Nfkbiz,Vsir,Was,Trem1,Nckap1l,Cd244a,Spn,Lef1,Il33,Fcer1a,Dclre1c,Gba1,Cd28,Fosl2,Pag1,Fut7,Prkd2,Syk,Tfeb,Pkn1,Iglc3,Adcy7,Rab27a,Csf2rb,Hspd1,Kmt5b,Lat2,Gapt,Il31ra,Hlx,Unc13d,Nlrp3,Prkcb,Anxa1,H2-D1,Trpm4,Tap1,Fcer1g,Zc3h12a,Pf4,Mpeg1,C1rl,Phb…
CELL CHEMOTAXIS (GO: BP)	0.000794338	0.0280824	0.477271	-0.302334	-1.40544	284	Csf3r,Il1b,Mmp9,Trpm2,Il17ra,Prkcd,Ppbp,Arrb2,Lyst,S100a9,Trem3,Cx3cr1,Nr4a1,Coro1a,Cxcl2,Ripor2,Gpsm3,Abcc1,Ccl6,Trem1,Nckap1l,Lef1,Camk1d,Adam8,S100a8,Itgam,Lgals3,Prkd2,Tnfsf14,Syk,Itgb2,Nrp1,Ccr1,Cxcr2,Stap1,Plec,Anxa1,Flt1,Trpm4,Tirap,Fcer1g,Pf4,Rin3,Ccr2,Vav1,Hgf,Vav3,Rac2,Itgb2l,Ccl3,Mcu,Pde4b,Il16,Thbs1,Ninj1,Alox5,Cklf,Mtus1,Ctsg,Spi1,Bin2,Jaml,Eng,Mapk3,Ccn3,Retnlg,Il12a,Ptk2b,Ifng,Mmp28
TAXIS (GO: BP)	0.000356773	0.015892	0.498493	-0.297332	-1.41239	398	Csf3r,Il1b,Mmp9,Trpm2,Sema4d,Mycbp2,Il17ra,Prkcd,Ppbp,Arrb2,Lyst,Ear2,S100a9,Trem3,Fes,Cx3cr1,Nr4a1,Sema4a,Coro1a,Cxcl2,Ripor2,Gpsm3,Abcc1,Ccl6,Trem1,Nckap1l,Lef1,Lsp1,Camk1d,Adam8,S100a8,Itgam,Lgals3,Prkd2,Tnfsf14,Syk,Itgb2,Nrp1,Ccr1,Cxcr2,Stap1,Plec,Plxna4,Pip5k1c,Anxa1,Flt1,Cmtm7,Trpm4,Tirap,Fcer1g,Bmpr2,Pf4,Rin3,Fpr1,Ythdf1,Ccr2,Vav1,Hgf,Vav3,Rac2,Dock2,Itgb2l,Ccl3,Sema4f,Mcu,Pde4b,Robo3,Il16…
RIBOSOME BIOGENESIS (GO: BP)	0.00064925	0.0247122	0.477271	-0.304352	-1.4193	311	Rrp1,Mak16,Heatr3,Wdr43,Sdad1,Ddx10,Lyar,Kri1,Sirt7,Ebna1bp2,Ncl,Tsr1,Riok1,Pwp2,Gar1,Pes1,Rrp36,Ddx18,Rrp1b,2810004N23Rik,Rbm34,Exosc7,Pten,Rpf2,Rrp9,Ddx3x,Wdr12,Rrs1,Brix1,Heatr1,Tfb2m,Utp20,Rbfa,Imp4,Rpusd4,Dicer1,Exosc2,Zfp593,Eif6,Dkc1,Mrto4,Rpp40,Utp18,Rpl35rt,Gtpbp4,Nop10,Riok2,Dhx37,Mybbp1a,Zcchc4,Slx9,Nop2,Pwp1,Pop4,Npm1,Nop16,Exosc10,Ltv1,Nle1,Nom1,Gtf3a,Mrps2,Utp15,LTO1,Ybey,Nifk,Rrp7a…
REGULATION OF IMMUNE EFFECTOR PROCESS (GO: BP)	0.000130614	0.00751225	0.518848	-0.299035	-1.42336	399	Gata2,Il1b,Pik3r6,Lilrb4b,Laptm5,Klrb1f,Fgr,Ptprc,H2-Q10,Cd84,Ms4a2,Il18rap,Arrb2,Stxbp2,S100a9,Fes,Fgl2,Cx3cr1,Rigi,Ncf1,P2rx7,Rara,Nfkbiz,Vsir,Was,Nckap1l,Cd244a,Spn,Il33,Mapkapk2,Fcer1a,Cd28,Itgam,Plcg2,Lgals3,Rasgrp1,Fut7,Syk,Pkn1,Itgb2,Foxp1,Pten,Hspd1,Kmt5b,Shb,Stap1,Hlx,Unc13d,Nlrp3,Anxa1,Litaf,H2-D1,Trpm4,Tirap,Tap1,Fcer1g,Zc3h12a,Pf4,Myo18a,Phb1,Pglyrp1,Tap2,Dhx58,Ccr2,Vav1,Gpi1,Rac2,Itg…
REGULATION OF CELL MORPHOGENESIS (GO: BP)	0.000974735	0.0323805	0.477271	-0.309734	-1.42517	262	Cux1,Zmym3,Sema4d,Cdc42ep2,Fgr,Cd44,Fmnl3,Cdc42se1,Mov10,Cul7,Fes,Arhgap18,Sema4a,Coro1a,Diaph1,Parp6,Dnmbp,Msn,Rhou,Capzb,Camk2b,Aldoa,Fgd4,Zmpste24,Wdr1,Smurf1,Pten,Zranb1,Plxna4,Anxa1,Cpne5,Hck,Pxn,Fmnl1,Bcl11a,Plaa,Pdzd8,Ss18l1,Arhgef18,Ccl3,Cldn4,Cfap410,Arap1,Hexb,Myh9,Coro1c,Palm,Actr2,Rdx,Dbnl,F11r,Larp4,Nherf1,Plxnc1,Dhx36,Actr3,Ptk2b,Mpl,Plxna3,Strip1,Tnik,Cdc42se2,Epha4
REGULATION OF CELL CELL ADHESION (GO: BP)	9.06406e-05	0.00563361	0.538434	-0.299593	-1.44354	462	Cited2,Zmiz1,L1cam,Il1b,Ccdc88b,Pik3r6,Lilrb4b,Laptm5,Zfp609,Flot2,Cd44,Tnfrsf13c,Ptprc,Epb41l5,Prkcd,Runx1,Zdhhc21,Fgl2,Ass1,Cd9,Rara,Coro1a,Alox15,Smarcd2,Nfkbiz,Vsir,Ripor2,Plaur,Nckap1l,Cd244a,Spn,Lef1,Adam8,Pde5a,Iglc4,Cd28,Itch,Pag1,Lgals3,Il1rn,Rasgrp1,Fut7,Runx3,Tnfsf14,Sirpb1b,Syk,Actb,Itgb2,Cebpb,Pten,Zc3h8,Hspd1,Fut4,Shb,Hlx,Nlrp3,Anxa1,Adam19,Alox12,Zc3h12a,Smarca2,Pf4,Vps33b,Lrrc32,T…
EPIDERMIS DEVELOPMENT (GO: BP)	0.000322235	0.0147825	0.498493	-0.311559	-1.44532	300	Cux1,Insr,Satb1,Macroh2a1,Krt7,Rbpj,Tradd,Runx1,Zdhhc21,Ybx1,Ncor1,Igf1r,Nfkbiz,Ripor2,Tgm3,Ptch2,Cdh23,Gba1,Fosl2,Runx3,Zmpste24,Inhba,Pls1,Ift88,Gsdme,Plec,Ctnnb1,Plod3,Myo7a,Anxa1,Alox12,Ppard,Flnb,Nsun2,Atp2c1,Pnpla1,Cflar,Dicer1,Cldn4,Ift74,Atp7a,Wnt10a,Hoxa7,Bcr,Edaradd,Klf4,Ptgs1,Apc,Nab1,Tprn,Myo5a,Krt80,Casp3,Ift172,Ncor2,Srsf6,Nherf1,Aldh3a2,Vdr,Nom1,Lncpint,Rock1,Snai1,Tnf,Rela
CELL CELL ADHESION (GO: BP)	6.87192e-07	0.000132405	0.659444	-0.286702	-1.44585	784	Ncam1,Tjp3,Cited2,Zmiz1,Adgrl1,L1cam,Il1b,Ccdc88b,Sema4d,Cyfip2,Slc7a11,Pik3r6,Lilrb4b,Selplg,Laptm5,Zfp609,Flot2,Cd44,Tnfrsf13c,Ptprc,Epb41l5,Prkcd,Lims1,Plek,Runx1,S100a9,Zdhhc21,Fgl2,Cx3cr1,Ass1,Cd9,Ubash3a,Stk10,Rara,Coro1a,Alox15,Smarcd2,Nfkbiz,Vsir,Ripor2,Plaur,Nckap1l,Cd244a,Spn,Lef1,Adam8,Pde5a,Msn,S100a8,Itga2b,Arvcf,Cdh23,Iglc4,Cd28,Itgam,Itch,Pag1,Tln1,Lgals3,Il1rn,Rasgrp1,Fut7,Runx3,T…
ORGANOPHOSPHATE CATABOLIC PROCESS (GO: BP)	0.0012401	0.0388244	0.45506	-0.321293	-1.44735	217	Foxk1,Hdac4,Insr,Adpgk,Cbfa2t3,Prkcd,Plbd1,Hk2,Upb1,Ncf2,Samhd1,Ncf1,P2rx7,Pkm,Ncor1,Hk3,Slc2a6,Gdpd3,Eno3,Uchl1,Pde5a,Nudt7,Aldoa,Pfkl,Plcg2,Pde4a,Pten,Nudt18,Galt,Pfkp,Ldlr,Cnp,Acot7,Nudt3,Pde9a,Gpi1,Eno1,Nudt13,Eif6,Mlst8,Ier3,Nudt5,Mlycd,Prdx6,Xdh,Gale,Smpd2,Prkag2,Gapdh,Inpp5f,Eno1b,Git1,Pde1a,Synj2,Ifng,Actn3,Entpd5,Galk1,Tpi1,Smpdl3b,Gmpr2,Src,Cant1,Pgk1,Stat3,Napepld,Plb1,Ogt,Entpd1
POSITIVE REGULATION OF CELL CELL ADHESION (GO: BP)	0.000272846	0.0132965	0.498493	-0.312122	-1.45525	306	Cited2,Zmiz1,L1cam,Il1b,Ccdc88b,Pik3r6,Lilrb4b,Zfp609,Flot2,Cd44,Tnfrsf13c,Ptprc,Runx1,Rara,Coro1a,Alox15,Smarcd2,Nfkbiz,Vsir,Plaur,Nckap1l,Cd244a,Spn,Lef1,Adam8,Iglc4,Cd28,Rasgrp1,Fut7,Runx3,Tnfsf14,Sirpb1b,Syk,Actb,Itgb2,Hspd1,Fut4,Shb,Hlx,Nlrp3,Anxa1,Adam19,Smarca2,Tnfsf13b,Abl2,Gp1ba,Ccr2,Sirpb1c,Il6ra,Irf1,Skap1,Smarcd3,Zbtb7b,Dock8,Gcnt2,Alox5,Nfat5,Ctsg,Brd4,Gata3,Ptpru,F11r,Bcl10,Itpkb,So…
REGULATION OF LEUKOCYTE MEDIATED IMMUNITY (GO: BP)	0.000679884	0.0253134	0.477271	-0.319453	-1.46693	256	Gata2,Il1b,Pik3r6,Lilrb4b,Klrb1f,Fgr,Ptprc,H2-Q10,Cd84,Ms4a2,Il18rap,Arrb2,Stxbp2,Fes,Cx3cr1,Rigi,P2rx7,Vsir,Was,Nckap1l,Spn,Fcer1a,Cd28,Itgam,Plcg2,Rasgrp1,Fut7,Syk,Itgb2,Hspd1,Kmt5b,Stap1,Unc13d,Nlrp3,H2-D1,Trpm4,Tap1,Fcer1g,Tap2,Ccr2,Vav1,Rac2,Itgb2l,Btk,Bcr,Tyrobp,Klrb1b,Spi1,Cd40,Pram1,Gata3,H2-K1,H2-T22,Dhx36,Ceacam1,Il12a,Clcf1,Ifng,Il18r1,Tnf,Ap1g1,Stx4a,Cd177,Supt6,Clec7a
T CELL ACTIVATION (GO: BP)	6.12633e-06	0.000665009	0.610527	-0.296874	-1.4696	554	Zmiz1,Il1b,Ccdc88b,Satb1,Pik3r6,Lilrb4b,Laptm5,Zfp609,Flot2,Cd44,Tnfrsf13c,Ptprc,Treml2,Cd84,Nedd4,Sit1,Lcp1,Runx1,Zeb1,Fgl2,Clec4d,P2rx7,Slfn2,Rara,Ncor1,Sema4a,Coro1a,Smarcd2,Nfkbiz,Vsir,Ripor2,Was,Clec4e,Nckap1l,Cd244a,Spn,Lef1,Adam8,Apbb1ip,Pde5a,Msn,Hsh2d,Clec4f,Iglc4,Gja1,Gba1,Cd28,Fosl2,Itgam,Itch,Pag1,Lgals3,Rasgrp1,Fut7,Cd48,Runx3,Tnfsf14,Sirpb1b,Syk,Actb,Itgb2,Rab27a,Foxp1,Cebpb,Pten,Fk…
T CELL DIFFERENTIATION (GO: BP)	0.000153624	0.00839705	0.518848	-0.319057	-1.48132	322	Zmiz1,Il1b,Satb1,Pik3r6,Lilrb4b,Zfp609,Cd44,Ptprc,Runx1,Zeb1,Fgl2,Clec4d,Rara,Ncor1,Sema4a,Smarcd2,Nfkbiz,Vsir,Clec4e,Nckap1l,Spn,Lef1,Adam8,Gba1,Cd28,Fosl2,Rasgrp1,Fut7,Runx3,Syk,Actb,Foxp1,Zc3h8,Shb,Ctnnb1,Patz1,Hlx,Nlrp3,Cdk6,Anxa1,Fcer1g,Zc3h12a,Smarca2,Pf4,Bcl11a,Abl2,Ccr2,Vav1,Dock2,Il6ra,Pdp2,Dicer1,Irf1,Smarcd3,Atp7a,Zbtb7b,Spi1,Brd4,Rc3h2,Apc,Lmbr1l,Gata3,Itpkb,Socs1,Nkap,Tnfsf9,Carmil2,…
LYMPHOCYTE ACTIVATION (GO: BP)	3.5091e-07	7.9543e-05	0.674963	-0.294575	-1.48426	783	Zmiz1,Il1b,Ly6d,Ccdc88b,Satb1,Pik3r6,Lilrb4b,Laptm5,Zfp609,Fgr,Cd79a,Vpreb1a,Flot2,Cd44,Tnfrsf13c,Ptprc,Treml2,Cd84,Prkcd,Nedd4,Impdh1,Rbpj,Lyst,Nfam1,Sit1,Lcp1,Runx1,Spib,Zeb1,Dock10,Fgl2,Clec4d,Pou2f2,P2rx7,Irf8,Slfn2,Rara,Ncor1,Sema4a,Coro1a,Smarcd2,Nfkbiz,Vsir,Ripor2,Was,Clec4e,Nckap1l,Cd244a,Spn,Hps1,Lef1,Adam8,Apbb1ip,Pde5a,Msn,Hsh2d,Clec4f,Itm2a,Dclre1c,Iglc4,Gja1,Gba1,Cd28,Fosl2,Itgam,Itc…
CELL KILLING (GO: BP)	0.000482606	0.0194593	0.498493	-0.332512	-1.49083	212	Gzma,Pik3r6,Ltf,Klrb1f,Ptprc,H2-Q10,Ppbp,Il18rap,Arrb2,Lyz2,Lyst,Stxbp2,Camp,Trem3,Fgl2,Cx3cr1,Ncf1,P2rx7,Coro1a,Trem1,Nckap1l,Itgam,Lgals3,Rasgrp1,Syk,Rab27a,Stap1,Unc13d,H2-D1,Tap1,Pglyrp1,Tap2,Vav1,C8a,Ninj1,Tyrobp,Klrb1b,Ctsg,Spi1,Gapdh,H2-K1,H2-T22,Ceacam1,Il12a,Ifng,Hsp90ab1,Ap1g1
IMMUNE EFFECTOR PROCESS (GO: BP)	5.11291e-07	0.000103184	0.659444	-0.299289	-1.49123	645	Gata2,Csf3r,Ace,Il1b,Igll1,Pik3r6,Lilrb4b,Laptm5,Klrb1f,Fgr,Ptprc,H2-Q10,Cd84,Prkcd,Ms4a2,Il18rap,Arrb2,Lyst,Stxbp2,Lcp1,S100a9,Trem3,Dock10,Fes,Fgl2,Cx3cr1,Clec4d,Pou2f2,Rigi,Ncf1,P2rx7,Milr1,Irf8,Slfn2,Rara,Irak4,Sema4a,Coro1a,Nfkbiz,Vsir,Was,Trem1,Clec4e,Nckap1l,Cd244a,Spn,Lef1,Il33,Apbb1ip,Mapkapk2,Fcer1a,Itm2a,Gba1,Cd28,Fosl2,Itgam,Plcg2,Notch2,Lgals3,Rasgrp1,Rab44,Fut7,Syk,Pkn1,Myo1f,Itgb2,…
CELL ACTIVATION (GO: BP)	1.11183e-09	5.0405e-07	0.788187	-0.290772	-1.49545	1062	Zmiz1,Gata2,Il1b,Ly6d,Ccdc88b,Mmp8,Satb1,Slc7a11,Pik3r6,Ptpre,Lilrb4b,Selplg,Laptm5,Zfp609,Fgr,Cd79a,Vpreb1a,Il17ra,Flot2,Cd44,Tnfrsf13c,Ptprc,Treml2,Cd84,Prkcd,Ms4a2,Nedd4,Il18rap,Impdh1,Treml1,Gp5,Rbpj,Lyst,Stxbp2,Camp,Lrrk2,Plek,Nfam1,Sit1,Lcp1,Runx1,Spib,Zeb1,Dock10,Fes,Fgl2,Cx3cr1,Clec4d,Pou2f2,Cd9,P2rx7,Ubash3a,Zeb2,Milr1,Irf8,Slfn2,Rara,Ncor1,Cd300lf,Sema4a,Coro1a,Smarcd2,Nfkbiz,Ifngr2,Vsi…
POSITIVE REGULATION OF CELL ADHESION (GO: BP)	2.68188e-06	0.000370145	0.627257	-0.314798	-1.52735	477	Cited2,Zmiz1,L1cam,Il1b,Ccdc88b,Iqgap1,Pik3r6,Lilrb4b,Zfp609,Flot2,Cd44,Tnfrsf13c,Ptprc,Epb41l5,Lims1,Runx1,Rara,Coro1a,Alox15,Smarcd2,Nfkbiz,Arpc2,Vsir,Plaur,Dock5,Trem1,Cass4,Nckap1l,Cd244a,Spn,Lef1,Adam8,Apbb1ip,Iglc4,Cd28,Flna,Rasgrp1,Fut7,Prkd2,Runx3,Tnfsf14,Sirpb1b,Syk,Actb,Itgb2,Nrp1,Hspd1,Fut4,Shb,Hlx,Unc13d,Nlrp3,Cdk6,Anxa1,Adam19,Cspg5,Adgrg1,Smarca2,Tnfsf13b,Abl2,Gp1ba,Ccr2,Vav1,Lamb1,…
POSITIVE REGULATION OF CELL SUBSTRATE ADHESION (GO: BP)	0.00127979	0.0396118	0.45506	-0.363808	-1.53046	128	L1cam,Iqgap1,Epb41l5,Lims1,Alox15,Arpc2,Dock5,Trem1,Cass4,Flna,Nrp1,Unc13d,Cdk6,Cspg5,Dicer1,P4hb,Skap1,Myh9,Cdc42,Olfm4,Thbs1,Ninj1,Vit,Plekha2,Rin2,Ptpn11,Egfl6,Utrn,Ptk2b,Rock1,Hsd17b12,Prkce,Itgb3,Dnm2,Dab2,Abi3bp,Nedd9,Prex1
LEUKOCYTE CHEMOTAXIS (GO: BP)	0.000266075	0.0132616	0.498493	-0.341776	-1.53237	212	Csf3r,Il1b,Mmp9,Trpm2,Il17ra,Ppbp,Lyst,S100a9,Trem3,Cx3cr1,Coro1a,Cxcl2,Ripor2,Gpsm3,Ccl6,Trem1,Nckap1l,Camk1d,Adam8,S100a8,Itgam,Lgals3,Tnfsf14,Syk,Itgb2,Ccr1,Cxcr2,Stap1,Plec,Anxa1,Flt1,Trpm4,Tirap,Fcer1g,Pf4,Rin3,Ccr2,Vav1,Vav3,Rac2,Itgb2l,Ccl3,Mcu,Pde4b,Il16,Thbs1,Ninj1,Alox5,Cklf,Mtus1,Ctsg,Spi1,Jaml,Mapk3,Ccn3,Retnlg,Il12a,Ptk2b,Ifng,Mmp28
LEUKOCYTE CELL CELL ADHESION (GO: BP)	1.6702e-05	0.00147957	0.57561	-0.325499	-1.53911	390	Zmiz1,L1cam,Il1b,Ccdc88b,Sema4d,Pik3r6,Lilrb4b,Selplg,Laptm5,Zfp609,Flot2,Cd44,Tnfrsf13c,Ptprc,Runx1,S100a9,Zdhhc21,Fgl2,Cx3cr1,Ass1,Stk10,Rara,Coro1a,Smarcd2,Nfkbiz,Vsir,Ripor2,Nckap1l,Cd244a,Spn,Lef1,Adam8,Pde5a,Msn,S100a8,Iglc4,Cd28,Itgam,Itch,Pag1,Lgals3,Rasgrp1,Fut7,Runx3,Tnfsf14,Sirpb1b,Syk,Actb,Itgb2,Cebpb,Pten,Zc3h8,Hspd1,Fut4,Shb,Hlx,Nlrp3,Anxa1,Zc3h12a,Smarca2,Pf4,Lrrc32,Tnfsf13b,Abl2,G…
MYELOID LEUKOCYTE MIGRATION (GO: BP)	0.000254623	0.0130825	0.498493	-0.343638	-1.5422	222	Csf3r,Il1b,Mmp9,Il17ra,Ppbp,Lyst,S100a9,Trem3,Cx3cr1,Cd9,Irak4,Cxcl2,Ripor2,Ccl6,Trem1,Nckap1l,Camk1d,Adam8,S100a8,Cnn2,Itgam,Lgals3,Fut7,Syk,Myo1f,Itgb2,Wdr1,Ccr1,Cxcr2,Fut4,Stap1,Cd200r1,Anxa1,Flt1,Tirap,Fcer1g,Pf4,Rin3,Ccr2,Vav1,Vav3,Rac2,Itgb2l,Ccl3,Mcu,Pde4b,Thbs1,Ninj1,Cd200,Bcr,Cklf,Mtus1,Ctsg,Spi1,Jaml,Mapk3,Ccn3,Retnlg,Ptk2b,Ifng,Mmp28
PURINE CONTAINING COMPOUND CATABOLIC PROCESS (GO: BP)	0.00100112	0.0328325	0.45506	-0.360571	-1.55927	146	Foxk1,Hdac4,Insr,Adpgk,Cbfa2t3,Hk2,Ncf2,Samhd1,Ncf1,P2rx7,Pkm,Ncor1,Hk3,Slc2a6,Eno3,Uchl1,Pde5a,Nudt7,Aldoa,Pfkl,Pde4a,Nudt18,Galt,Pfkp,Acot7,Nudt3,Pde9a,Gpi1,Eno1,Nudt13,Eif6,Mlst8,Ier3,Mlycd,Xdh,Gale,Prkag2,Gapdh,Eno1b,Git1,Pde1a,Ifng,Actn3,Galk1,Ahcy,Tpi1,Gmpr2,Src,Pgk1,Stat3,Ogt,Entpd1
LEUKOCYTE MEDIATED IMMUNITY (GO: BP)	1.91895e-06	0.000305804	0.627257	-0.325497	-1.5678	430	Gata2,Csf3r,Ace,Il1b,Igll1,Pik3r6,Lilrb4b,Klrb1f,Fgr,Ptprc,H2-Q10,Cd84,Prkcd,Ms4a2,Il18rap,Arrb2,Lyst,Stxbp2,Trem3,Fes,Fgl2,Cx3cr1,Pou2f2,Rigi,Ncf1,P2rx7,Milr1,Slfn2,Irak4,Coro1a,Nfkbiz,Vsir,Was,Trem1,Nckap1l,Spn,Fcer1a,Gba1,Cd28,Fosl2,Itgam,Plcg2,Rasgrp1,Rab44,Fut7,Syk,Myo1f,Itgb2,Wdr1,Iglc3,Rab27a,Csf2rb,Cd300lb,Hspd1,Kmt5b,Lat2,Gapt,Stap1,Il31ra,Unc13d,Nlrp3,H2-D1,Trpm4,Tap1,Fcer1g,C1rl,Tap2,C…
PHAGOCYTOSIS (GO: BP)	0.000106564	0.00646684	0.538434	-0.351127	-1.5743	212	Gata2,Fgr,Ptprc,Cdc42se1,Siglece,Lyst,Ncf2,P2rx7,Arhgap25,Irf8,Rara,Cd300lf,Coro1a,Alox15,Lyar,Nckap1l,Camk1d,Atg7,Cnn2,Itgam,Plcg2,Rab11fip2,Sirpb1b,Syk,Itgb2,Rab27a,Pten,Stap1,Unc13d,Ldlr,Myo7a,Pip5k1c,Anxa1,Rab14,Hck,Fcer1g,Myo18a,Abl2,Msr1,Ccr2,Vav1,Dock2,Sirpb1c,Lman2,Myo1g,Ncf4,Btk,Myh9,Cdc42,Thbs1,Coro1c,Bcr,Tyrobp,Bin2,Anxa11,Cln3,Ifng,Elmo1,Cyba,Clec7a,C2,Cdc42se2,Il2rg,Rab7,Csk,Slc11a1,…
NUCLEOSIDE DIPHOSPHATE CATABOLIC PROCESS (GO: BP)	0.00125902	0.0391261	0.45506	-0.384252	-1.59174	109	Foxk1,Hdac4,Insr,Adpgk,Cbfa2t3,Hk2,P2rx7,Pkm,Ncor1,Hk3,Slc2a6,Eno3,Uchl1,Aldoa,Pfkl,Nudt18,Galt,Pfkp,Gpi1,Eno1,Eif6,Mlst8,Ier3,Nudt5,Gale,Prkag2,Gapdh,Eno1b,Git1,Ifng,Actn3,Entpd5,Galk1,Tpi1,Src,Cant1,Pgk1,Stat3,Ogt,Entpd1
GRANULOCYTE CHEMOTAXIS (GO: BP)	0.00155605	0.0455988	0.45506	-0.3857	-1.59783	117	Csf3r,Il1b,Il17ra,Ppbp,Lyst,S100a9,Trem3,Cxcl2,Ripor2,Ccl6,Trem1,Nckap1l,Camk1d,S100a8,Itgam,Lgals3,Syk,Itgb2,Cxcr2,Anxa1,Tirap,Fcer1g,Pf4,Vav1,Vav3,Rac2,Itgb2l,Ccl3,Mcu,Pde4b,Thbs1,Cklf
MYELOID LEUKOCYTE ACTIVATION (GO: BP)	3.17464e-05	0.0024467	0.557332	-0.353015	-1.60637	246	Gata2,Mmp8,Ptpre,Lilrb4b,Fgr,Cd84,Prkcd,Ms4a2,Il18rap,Rbpj,Stxbp2,Camp,Lrrk2,Fes,Cx3cr1,Clec4d,Milr1,Cd300lf,Ifngr2,Cd244a,Il33,Fcer1a,Itgam,Plcg2,Notch2,Rasgrp1,Rab44,Cd48,Syk,Myo1f,Itgb2,Foxp1,Cd300lb,Hspd1,Cxcr2,Lat2,Stap1,Unc13d,Ldlr,Anxa1,Clu,Sbno2,Cebpa,Fcer1g,Myo18a,Hspa4,Ccr2,Rac2,Dock2,Itgb2l,Pirb,Btk,Il16,Thbs1,Cd200,Bcr,Crlf2,Pilrb1,Tyrobp,Shpk,Ndrg1,Tslp,Ctsg,Spi1,Pram1,Bcl10,Tnfsf9,I…
REGULATION OF SEMAPHORIN PLEXIN SIGNALING PATHWAY (GO: BP)	0.000510286	0.0201288	0.477271	-0.97596	-1.63229	3	Ncam1
RRNA METABOLIC PROCESS (GO: BP)	1.34226e-05	0.00126157	0.593325	-0.359863	-1.6352	247	Rrp1,Macroh2a1,Tcof1,Mak16,Polr1a,Wdr43,Ddx10,Lyar,Kri1,Sirt7,Ebna1bp2,Ncl,Tsr1,Riok1,Pwp2,Gar1,Pes1,Rrp36,Ddx18,Rrp1b,Rbm34,Exosc7,Rpf2,Rrp9,Polr1f,Polr1g,Wdr12,Rrs1,Brix1,Heatr1,Tfb2m,Utp20,Rbfa,Imp4,Rpusd4,Xrn1,Dicer1,Exosc2,Eif6,Dkc1,Mrto4,Rpp40,Utp18,Rpl35rt,Gtpbp4,Nop10,Riok2,Dhx37,Slfn8,Zcchc4,Slx9,Nop2,Pwp1,Pop4,Npm1,Exosc10,Polr1d,Utp15,Ybey,Nifk,Rrp7a,Ercc3,Rrp12,Krr1,Wdr74,Bud23,Ngdn,N…
INTERLEUKIN 6 PRODUCTION (GO: BP)	0.000112167	0.00664975	0.538434	-0.374066	-1.63556	166	Il1b,Lilrb4b,Laptm5,Il36g,Il17ra,Cd84,Il18rap,Arrb2,Grk2,Pou2f2,Rigi,P2rx7,Nckap1l,Il33,Cd300ld,Ncl,Mapkapk2,Gba1,Plcg2,Syk,Cebpb,Pten,Hspd1,Cd200r1,Tirap,Nlrc3,Fcer1g,Zc3h12a,Trim30a,Mapk13,Hgf,Il6ra,Inpp5d,Btk,Il16,Cd200,Tyrobp,Tslp,Nlrp12,Ash1l,Tut4,Nlrx1,Ptpn11,Tnfsf9,Ifng,Mbp,Tnf,Rela,Cyba,Bank1,Azi2,Il1rap,Irak3,Clec7a,Unc93b1,Csk,Ptpn6,Tbc1d23,Tlr8,Zg16,Stat3,Arhgef2,Ticam2,Ptafr,Nod2
POSITIVE REGULATION OF LYMPHOCYTE DIFFERENTIATION (GO: BP)	0.000391426	0.0168532	0.498493	-0.384237	-1.64138	135	Zmiz1,Pik3r6,Lilrb4b,Zfp609,Ptprc,Runx1,Rara,Smarcd2,Nfkbiz,Vsir,Nckap1l,Lef1,Adam8,Rasgrp1,Runx3,Syk,Actb,Shb,Hlx,Nlrp3,Anxa1,Smarca2,Ccr2,Inpp5d,Irf1,Smarcd3,Zbtb7b,Spi1,Brd4,Gata3,Itpkb,Socs1,Nkap,Tnfsf9,Carmil2,Il12a,Ifng,Brd7,Brd2,H2-DMa,Il2rg,Flt3l,Ambra1,Ap3d1,Sox13
LEUKOCYTE MEDIATED CYTOTOXICITY (GO: BP)	0.000473424	0.0193052	0.498493	-0.382865	-1.64364	139	Pik3r6,Klrb1f,Ptprc,H2-Q10,Il18rap,Arrb2,Lyst,Stxbp2,Trem3,Cx3cr1,Ncf1,P2rx7,Coro1a,Trem1,Nckap1l,Itgam,Rasgrp1,Rab27a,Stap1,Unc13d,H2-D1,Tap1,Tap2,Vav1,Tyrobp,Klrb1b,Ctsg,Spi1,H2-K1,H2-T22,Ceacam1,Il12a,Ap1g1
GRANULOCYTE MIGRATION (GO: BP)	0.000358791	0.015892	0.498493	-0.3827	-1.6558	145	Csf3r,Il1b,Il17ra,Ppbp,Lyst,S100a9,Trem3,Irak4,Cxcl2,Ripor2,Ccl6,Trem1,Nckap1l,Camk1d,Adam8,S100a8,Itgam,Lgals3,Fut7,Syk,Myo1f,Itgb2,Wdr1,Cxcr2,Fut4,Anxa1,Tirap,Fcer1g,Pf4,Vav1,Vav3,Rac2,Itgb2l,Ccl3,Mcu,Pde4b,Thbs1
REGULATION OF CELLULAR RESPONSE TO INSULIN STIMULUS (GO: BP)	0.000850099	0.0293799	0.477271	-0.419106	-1.65887	86	Il1b,Grb7,Ptpre,Esrra,Ide,Sorl1,Prkcd,Grk2,Gnai2,Sco1,Ncl,Ptpn1,Prkcb,Atp2b1,Pip4k2b,Nucb2,Slc27a4,Myo1c,Zbtb7b,Pid1,Ncoa1,Myo5a,Ptpn11,Socs1,Tnf,Rela,Uso1,Rps6kb1
LYMPHOCYTE ACTIVATION INVOLVED IN IMMUNE RESPONSE (GO: BP)	5.07785e-05	0.00359037	0.557332	-0.372015	-1.66574	192	Ptprc,Lcp1,Dock10,Fgl2,Clec4d,Irf8,Slfn2,Rara,Sema4a,Coro1a,Nfkbiz,Clec4e,Nckap1l,Cd244a,Spn,Lef1,Apbb1ip,Itm2a,Cd28,Plcg2,Notch2,Lgals3,Rab27a,Foxp1,Hspd1,Kmt5b,Cd180,Gapt,Shb,Hlx,Unc13d,Nlrp3,Anxa1,Fcer1g,Zc3h12a,Pf4,Pglyrp1,Ccr2,Phf14,Il6ra,Pdp2,Irf1,Atp7a,Zbtb7b,Spi1,Cd40,Brd4,Rc3h2,Gata3,Mfng,Clcf1,Ptk2b,Ifng,Il18r1,Ap1g1,Brd2,Rnf8,Sanbr,Ccr6,Supt6,Lgals1,Parp3,Shld2,Slc11a1,Rif1,Eomes
RRNA PROCESSING (GO: BP)	2.03909e-05	0.00170818	0.57561	-0.371929	-1.66747	213	Rrp1,Mak16,Wdr43,Ddx10,Lyar,Kri1,Sirt7,Ebna1bp2,Ncl,Tsr1,Riok1,Pwp2,Gar1,Pes1,Rrp36,Ddx18,Rrp1b,Rbm34,Exosc7,Rpf2,Rrp9,Wdr12,Rrs1,Brix1,Heatr1,Tfb2m,Utp20,Rbfa,Imp4,Rpusd4,Dicer1,Exosc2,Eif6,Dkc1,Mrto4,Rpp40,Utp18,Rpl35rt,Gtpbp4,Nop10,Riok2,Dhx37,Zcchc4,Slx9,Nop2,Pwp1,Pop4,Npm1,Exosc10,Utp15,Ybey,Nifk,Rrp7a,Rrp12,Krr1,Wdr74,Bud23,Ngdn,Nhp2,Nol9,Mterf4,Rpl7l1,Wdr3,Bms1,Nsun5,Exosc3,Exosc1,Wdr46,No…
VACUOLAR LOCALIZATION (GO: BP)	0.000725698	0.0263818	0.477271	-0.422899	-1.67389	86	Gata2,Fgr,Cd84,Ms4a2,Stxbp2,Fes,Milr1,Fcer1a,Rasgrp1,Rab44,Syk,Tfeb,Lat2,Unc13d,Fcer1g,Vps33b,Fam98a,Rac2,Sytl4,Btk,Myh9
MEMBRANE DOCKING (GO: BP)	0.00146854	0.0437679	0.45506	-0.437711	-1.69551	77	Ncam1,Stxbp2,Plek,Exoc7,Septin5,Rab8a,Exoc2,Stx6,Selenon,Ralb,Pdzd8,Exoc6b,Calm1,Sytl2,Vps18,Vps11,Vapa,Cln3,Stx1a,Rock1,Stx16,Pex26,Stx4a,Uso1,Unc13b,Rab7
T CELL DIFFERENTIATION INVOLVED IN IMMUNE RESPONSE (GO: BP)	0.000599184	0.0232056	0.477271	-0.436066	-1.71496	82	Fgl2,Clec4d,Rara,Sema4a,Nfkbiz,Clec4e,Spn,Lef1,Foxp1,Shb,Hlx,Nlrp3,Anxa1,Fcer1g,Zc3h12a,Pf4,Ccr2,Il6ra,Pdp2,Irf1,Atp7a,Zbtb7b,Brd4,Rc3h2,Gata3,Ifng,Il18r1,Brd2,Ccr6
ENDOCRINE SYSTEM DEVELOPMENT (GO: BP)	0.000169545	0.009202	0.518848	-0.426704	-1.73684	99	Cited2,Gata2,Ly6e,Insr,Rbpj,Igf1r,Pbx1,Raf1,Cdk6,Clu,Hoxa3,Il6ra,Arid5b,Hoxa5,Gata3,Mapk3
T CELL ACTIVATION INVOLVED IN IMMUNE RESPONSE (GO: BP)	0.000183247	0.00980755	0.518848	-0.422583	-1.74248	106	Lcp1,Fgl2,Clec4d,Slfn2,Rara,Sema4a,Nfkbiz,Clec4e,Nckap1l,Spn,Lef1,Apbb1ip,Lgals3,Rab27a,Foxp1,Shb,Hlx,Nlrp3,Anxa1,Fcer1g,Zc3h12a,Pf4,Ccr2,Il6ra,Pdp2,Irf1,Atp7a,Zbtb7b,Brd4,Rc3h2,Gata3,Ifng,Il18r1,Brd2,Ccr6
REGULATION OF ESTABLISHMENT OF T CELL POLARITY (GO: BP)	0.000927993	0.0310958	0.477271	-0.863675	-1.76418	6	Flot2,Ripor2,Abl2,Dock8
REGULATION OF LEUKOCYTE DEGRANULATION (GO: BP)	0.000865548	0.0297802	0.477271	-0.500826	-1.77141	51	Gata2,Fgr,Cd84,Ms4a2,Stxbp2,Fes,Nckap1l,Fcer1a,Itgam,Syk,Itgb2,Unc13d,Fcer1g,Ccr2,Rac2,Itgb2l,Bcr,Spi1,Pram1,Ap1g1,Stx4a,Cd177
ENDODERM DEVELOPMENT (GO: BP)	0.00107939	0.0349531	0.45506	-0.48415	-1.77981	59	Ctr9,Macroh2a1,Epb41l5,Inhba,Dusp2,Tnrc6c,Ctnnb1,Myh9,Setd2,Dusp5,Grb2,Bptf,Eomes,Brd3,Gdf3,Paf1,Map2k1,Hsbp1,Tnrc6a,Tgfb1,Leo1,Rtf1
CELL ACTIVATION INVOLVED IN IMMUNE RESPONSE (GO: BP)	1.22554e-07	3.25698e-05	0.690132	-0.383409	-1.78076	286	Gata2,Fgr,Ptprc,Cd84,Ms4a2,Stxbp2,Lcp1,Dock10,Fes,Fgl2,Clec4d,Milr1,Irf8,Slfn2,Rara,Sema4a,Coro1a,Nfkbiz,Clec4e,Nckap1l,Cd244a,Spn,Lef1,Il33,Apbb1ip,Fcer1a,Itm2a,Cd28,Itgam,Plcg2,Notch2,Lgals3,Rasgrp1,Rab44,Syk,Myo1f,Itgb2,Rab27a,Foxp1,Hspd1,Kmt5b,Cd180,Lat2,Gapt,Shb,Hlx,Unc13d,Nlrp3,Anxa1,Sbno2,Fcer1g,Zc3h12a,Pf4,Pglyrp1,Ccr2,Phf14,Rac2,Dock2,Itgb2l,Il6ra,Pdp2,Irf1,Btk,Atp7a,Zbtb7b,Bcr,Tyrobp,Sp…
MATURATION OF SSU RRNA FROM TRICISTRONIC RRNA TRANSCRIPT SSU RRNA 5 8S RRNA LSU RRNA (GO: BP)	0.000685323	0.0253932	0.477271	-0.551356	-1.788	34	Wdr43,Kri1,Tsr1,Pwp2,Rrp36,Rrs1,Heatr1,Rpp40,Dhx37,Slx9,Ngdn,Bms1,Wdr46,Utp6,Utp25,Utp4,Fcf1,Tbl3
POSITIVE REGULATION OF CD8 POSITIVE ALPHA BETA T CELL DIFFERENTIATION (GO: BP)	0.000484778	0.0194593	0.498493	-0.878938	-1.79536	6	Lilrb4b,Runx1,Nckap1l,Runx3
CARDIAC MUSCLE CELL MEMBRANE REPOLARIZATION (GO: BP)	0.00160028	0.0465408	0.45506	-0.58028	-1.79596	26	Scn4b,Gja1,Flna,Zmpste24,Wdr1,Akap9,Kcnj5,Kcnh2,Nos1ap
GLUCOSE CATABOLIC PROCESS (GO: BP)	0.00149703	0.0442055	0.45506	-0.581486	-1.79969	26	Foxk1,Pkm,Ldha,Eno3,Aldoa,Pfkl,Pfkp,Gpi1,Eno1,Gapdh,Eno1b,Actn3,Tpi1,Pgk1
NEUTROPHIL CHEMOTAXIS (GO: BP)	0.000317585	0.0146564	0.498493	-0.458698	-1.81218	84	Csf3r,Il1b,Ppbp,S100a9,Trem3,Cxcl2,Ripor2,Trem1,Nckap1l,Camk1d,S100a8,Itgam,Lgals3,Syk,Itgb2,Cxcr2,Tirap,Fcer1g,Pf4,Vav1,Vav3,Rac2,Itgb2l,Ccl3,Mcu,Pde4b,Cklf
MYELOID CELL ACTIVATION INVOLVED IN IMMUNE RESPONSE (GO: BP)	9.44589e-05	0.00582396	0.538434	-0.443405	-1.81347	101	Gata2,Fgr,Cd84,Ms4a2,Stxbp2,Fes,Milr1,Il33,Fcer1a,Itgam,Plcg2,Rasgrp1,Rab44,Syk,Myo1f,Itgb2,Lat2,Unc13d,Sbno2,Fcer1g,Ccr2,Rac2,Dock2,Itgb2l,Btk,Bcr,Tyrobp,Spi1,Pram1,Ifng,Tnf,Pi4k2a,Stx4a,Cd177,Prkce,Ptpn6,Gpr15lg,Pikfyve,Ptafr,Myd88,Snap23,Sphk2,Anxa3,Dnase1,Il4,Kars1,F2rl1,Slc18a2,Stx11
MATURATION OF 5 8S RRNA FROM TRICISTRONIC RRNA TRANSCRIPT SSU RRNA 5 8S RRNA LSU RRNA (GO: BP)	0.00142591	0.0427605	0.45506	-0.60034	-1.81999	24	Kri1,Pes1,Exosc7,Wdr12,Rrs1,Exosc2,Rpp40,Npm1,Exosc10,Nol9,Exosc3,Ftsj3,Fcf1
POSITIVE REGULATION OF RRNA PROCESSING (GO: BP)	0.00131409	0.0403493	0.45506	-0.780934	-1.8202	10	Wdr43,Sirt7,Riok1,Heatr1,Riok2,Utp15,Bud23
REGULATION OF MYELOID LEUKOCYTE MEDIATED IMMUNITY (GO: BP)	0.000293711	0.0138938	0.498493	-0.484049	-1.83002	66	Gata2,Fgr,Cd84,Ms4a2,Stxbp2,Fes,Cx3cr1,Rigi,Fcer1a,Itgam,Syk,Itgb2,Stap1,Unc13d,Fcer1g,Ccr2,Rac2,Itgb2l,Btk,Bcr,Tyrobp,Spi1,Pram1,Dhx36,Stx4a,Cd177
POSITIVE REGULATION OF MYELOID LEUKOCYTE MEDIATED IMMUNITY (GO: BP)	0.0016794	0.0484761	0.45506	-0.588346	-1.83251	27	Rigi,Itgam,Itgb2,Stap1,Fcer1g,Itgb2l,Btk,Tyrobp,Spi1,Dhx36,Stx4a,Cd177
REGULATION OF PODOSOME ASSEMBLY (GO: BP)	0.00162309	0.047027	0.45506	-0.705602	-1.83294	14	Lcp1,Arpc2,Msn,Hck,Tnf,Mapk9,Src,Arhgef2
NEUTROPHIL MIGRATION (GO: BP)	1.82993e-05	0.00156703	0.57561	-0.442982	-1.83503	109	Csf3r,Il1b,Ppbp,S100a9,Trem3,Irak4,Cxcl2,Ripor2,Trem1,Nckap1l,Camk1d,Adam8,S100a8,Itgam,Lgals3,Fut7,Syk,Myo1f,Itgb2,Wdr1,Cxcr2,Fut4,Tirap,Fcer1g,Pf4,Vav1,Vav3,Rac2,Itgb2l,Ccl3,Mcu,Pde4b,Cklf
VESICLE DOCKING (GO: BP)	0.000711596	0.0259918	0.477271	-0.515478	-1.84563	53	Ncam1,Stxbp2,Plek,Exoc7,Septin5,Rab8a,Exoc2,Stx6,Ralb,Exoc6b,Sytl2,Vps18,Vps11,Cln3,Stx1a,Stx16,Stx4a,Uso1,Unc13b
MAST CELL ACTIVATION (GO: BP)	6.49786e-05	0.00425463	0.538434	-0.475001	-1.84745	78	Gata2,Ptpre,Lilrb4b,Fgr,Cd84,Ms4a2,Stxbp2,Fes,Milr1,Cd300lf,Fcer1a,Rasgrp1,Rab44,Cd48,Syk,Cd300lb,Lat2,Unc13d,Fcer1g,Rac2,Btk,Crlf2,Ndrg1,Tslp
POSITIVE REGULATION OF ERBB SIGNALING PATHWAY (GO: BP)	0.000827026	0.0287112	0.477271	-0.597075	-1.84794	26	Mmp9,Rbpj,Plaur,Rala,Hip1r,Ralb,Shkbp1,Ccdc88a,Dgkd,Pde6g,Esr1
REGULATION OF GONAD DEVELOPMENT (GO: BP)	0.00067559	0.0252756	0.477271	-0.704192	-1.84916	15	Cited2,Insr,Runx1
ADRENAL GLAND DEVELOPMENT (GO: BP)	0.000890673	0.0305085	0.477271	-0.675897	-1.86965	18	Cited2,Ly6e,Insr,Igf1r,Pbx1,Arid5b
FUCOSYLATION (GO: BP)	0.000909347	0.0308737	0.477271	-0.747891	-1.8723	12	Slc35c2,Fut7,Slc35c1,Fut10,Fut4
POSITIVE REGULATION OF GRANULOCYTE MACROPHAGE COLONY STIMULATING FACTOR PRODUCTION (GO: BP)	0.000511905	0.0201288	0.477271	-0.808342	-1.88408	10	Il1b,Rigi,Fcer1a,Rasgrp1,Syk
NEUTROPHIL APOPTOTIC PROCESS (GO: BP)	0.000752056	0.0272117	0.477271	-0.753451	-1.88622	12	Slc7a11,Cd44,Itgam,Cxcr2,Anxa1,Itpkb,Ifng,Pik3cd
KILLING BY HOST OF SYMBIONT CELLS (GO: BP)	0.000811521	0.0284294	0.477271	-0.655887	-1.8875	21	Ltf,Camp,Trem3,Ncf1,Trem1,Ctsg,Gapdh
NEUTROPHIL ACTIVATION (GO: BP)	0.000274315	0.0132965	0.498493	-0.562089	-1.90047	40	Prkcd,Il18rap,Camp,Itgam,Syk,Myo1f,Itgb2,Cxcr2,Anxa1,Fcer1g,Itgb2l,Il16,Bcr,Tyrobp,Ctsg,Spi1,Pram1,Tnf,Cd177,Kmt2e,Pikfyve,Ptafr,Myd88,Traf3ip2,Anxa3,Prg3,Dnase1,F2rl1,Stx11
GLYCOLYTIC PROCESS THROUGH GLUCOSE 6 PHOSPHATE (GO: BP)	0.000696453	0.0255598	0.477271	-0.673929	-1.91149	20	Foxk1,Pkm,Eno3,Aldoa,Pfkl,Galt,Pfkp,Gpi1,Eno1,Gale,Gapdh,Eno1b,Galk1,Tpi1,Pgk1
NEGATIVE REGULATION OF INFLAMMASOME MEDIATED SIGNALING PATHWAY (GO: BP)	0.000989175	0.0327192	0.45506	-0.713827	-1.91411	16	Trim11,Sirt2,Nlrc3,Trim30a,Zdhhc12,Fbxl2,Mefv,Abhd17a,Igtp,Irgm1
NEUTROPHIL ACTIVATION INVOLVED IN IMMUNE RESPONSE (GO: BP)	0.00047238	0.0193052	0.498493	-0.668569	-1.924	21	Itgam,Syk,Myo1f,Itgb2,Fcer1g,Itgb2l,Bcr,Tyrobp,Spi1,Pram1,Cd177,Pikfyve,Ptafr,Myd88,Anxa3,Dnase1,Stx11
VESICLE DOCKING INVOLVED IN EXOCYTOSIS (GO: BP)	0.000551819	0.0215786	0.477271	-0.59112	-1.92438	35	Ncam1,Stxbp2,Plek,Exoc7,Septin5,Rab8a,Exoc2,Ralb,Exoc6b,Sytl2,Vps18,Vps11,Stx4a,Unc13b
NEUTROPHIL DEGRANULATION (GO: BP)	0.000650911	0.0247122	0.477271	-0.723286	-1.93947	16	Itgam,Syk,Myo1f,Itgb2,Itgb2l,Bcr,Spi1,Pram1,Cd177,Pikfyve,Ptafr,Anxa3,Stx11
REGULATION OF NEUTROPHIL DEGRANULATION (GO: BP)	0.000310595	0.0145076	0.498493	-0.774843	-1.93977	12	Itgam,Syk,Itgb2,Itgb2l,Bcr,Spi1,Pram1,Cd177,Ptafr
LEUKOCYTE DEGRANULATION (GO: BP)	1.37783e-05	0.00126416	0.593325	-0.495815	-1.94994	82	Gata2,Fgr,Cd84,Ms4a2,Stxbp2,Fes,Milr1,Coro1a,Nckap1l,Fcer1a,Itgam,Rasgrp1,Rab44,Syk,Myo1f,Itgb2,Rab27a,Lat2,Unc13d,Fcer1g,Ccr2,Rac2,Itgb2l,Btk,Bcr,Spi1,Pram1,Ap1g1,Pi4k2a,Stx4a,Cd177
SEMICIRCULAR CANAL DEVELOPMENT (GO: BP)	0.00025745	0.0131402	0.498493	-0.811039	-1.95128	11	Gata2,Zeb1,Eya1
POSITIVE REGULATION OF CD8 POSITIVE ALPHA BETA T CELL ACTIVATION (GO: BP)	5.96056e-05	0.00406531	0.557332	-0.88273	-1.95646	8	Lilrb4b,Runx1,Nckap1l,Cd244a,Runx3
LEUKOCYTE AGGREGATION (GO: BP)	0.000300753	0.0141336	0.498493	-0.721471	-1.96802	17	Il1b,Sema4d,Cd44,S100a9,Stk10,Adam8,Msn,S100a8,Rac2,Thbs1
RESPONSE TO FUNGUS (GO: BP)	4.48857e-05	0.0032485	0.557332	-0.542276	-1.98116	57	Ltf,Il17ra,Camp,Cx3cr1,Clec4d,Ncf1,Clec4e,Plcg2,Syk,Bak1,Btk,Tslp,Ctsg,Spi1,Bcl10,Gapdh,Clec7a,Pik3cd,Zbp1,Gpr15lg,Myd88,Mpo,Tgfb1,Clec4a1
ENDODERMAL CELL DIFFERENTIATION (GO: BP)	0.000144402	0.00806456	0.518848	-0.654013	-1.9827	24	Ctr9,Macroh2a1,Inhba,Ctnnb1,Myh9,Setd2,Grb2,Eomes,Brd3,Paf1,Map2k1,Hsbp1,Leo1,Rtf1
GRANULOCYTE ACTIVATION (GO: BP)	0.000132324	0.00755421	0.518848	-0.566486	-1.99648	48	Prkcd,Il18rap,Camp,Fcer1a,Itgam,Syk,Myo1f,Itgb2,Cxcr2,Anxa1,Fcer1g,Ccr2,Itgb2l,Il16,Bcr,Tyrobp,Ctsg,Spi1,Pram1,Tnf,Pi4k2a,Stx4a,Cd177,Kmt2e,Pikfyve,Ptafr,Myd88,Traf3ip2,Anxa3,Prg3,Dnase1,Kars1,F2rl1,Stx11
ENDODERM FORMATION (GO: BP)	8.69008e-05	0.00544508	0.538434	-0.627295	-2.01809	33	Ctr9,Macroh2a1,Inhba,Dusp2,Tnrc6c,Ctnnb1,Myh9,Setd2,Dusp5,Grb2,Eomes,Brd3,Paf1,Map2k1,Hsbp1,Leo1,Rtf1
MYELOID LEUKOCYTE MEDIATED IMMUNITY (GO: BP)	2.04554e-07	5.25499e-05	0.690132	-0.501374	-2.07934	115	Gata2,Ace,Fgr,Cd84,Ms4a2,Lyst,Stxbp2,Trem3,Fes,Cx3cr1,Rigi,Ncf1,Milr1,Irak4,Trem1,Fcer1a,Itgam,Rasgrp1,Rab44,Syk,Myo1f,Itgb2,Wdr1,Cd300lb,Lat2,Stap1,Unc13d,Fcer1g,Ccr2,Rac2,Itgb2l,Btk,Bcr,Tyrobp,Ctsg,Spi1,Pram1,Dhx36,Pi4k2a,Stx4a,Cd177
GRANULOCYTE MACROPHAGE COLONY STIMULATING FACTOR PRODUCTION (GO: BP)	9.72629e-06	0.000999126	0.593325	-0.819374	-2.12848	14	Il1b,Cd84,Rigi,Fcer1a,Fosl2,Rasgrp1,Syk
NEUTROPHIL MEDIATED IMMUNITY (GO: BP)	1.45429e-06	0.000249072	0.643552	-0.653553	-2.21718	41	Ace,Lyst,Trem3,Ncf1,Irak4,Trem1,Itgam,Syk,Myo1f,Itgb2,Wdr1,Cd300lb,Itgb2l,Bcr,Ctsg,Spi1,Pram1,Cd177,Kmt2e,Pikfyve,Ptafr,Myd88,Anxa3,Dnase1,F2rl1,Stx11

## Sheet: Table S5
Table S5: Annotated Peaks for cKit+
geneId	seqnames	start	end	width	strand	peak_name	fold-change	"-log10pvalue"	"-log10qvalue"	annotation	geneChr	geneStart	geneEnd	geneLength	geneStrand	transcriptId	distanceToTSS	SYMBOL
100503924	chr8	3722121	3722486	366	*	samples_merged_q_0.05_peak_267	6.97698	12.0611	7.82198	Promoter (<=1kb)	8	3721188	3722362	1175	2	ENSMUST00000159364.3	0	Fcor
102636181	chr14	58464052	58464305	254	*	samples_merged_q_0.05_peak_162	4.79667	6.88523	2.80296	Distal Intergenic	14	58538430	58540826	2397	1	ENSMUST00000224843.2	-74125	Gm33321
102638082	chr8	61085641	61086050	410	*	samples_merged_q_0.05_peak_270	9.15729	17.8984	13.5806	Promoter (<=1kb)	8	61069450	61085765	16316	2	ENSMUST00000210674.2	0	Gm34730
105247182	chr4	133540869	133541436	568	*	samples_merged_q_0.05_peak_226	11.7737	25.5627	21.1577	Promoter (2-3kb)	4	133543731	133544925	1195	1	ENSMUST00000129875.2	-2295	Gm12974
105594	chr14	25946310	25946568	259	*	samples_merged_q_0.05_peak_159	4.79667	6.88523	2.80296	Intron (ENSMUST00000183436.2/105594, intron 1 of 2)	14	25942963	25956780	13818	1	ENSMUST00000184016.3	3347	Cphx1
107182	chr19	36903845	36904125	281	*	samples_merged_q_0.05_peak_202	5.23274	7.85664	3.73042	Promoter (<=1kb)	19	36903479	36990152	86674	1	ENSMUST00000099494.4	366	Btaf1
107448	chr13	55096885	55097374	490	*	samples_merged_q_0.05_peak_134	7.8491	14.3272	10.0543	Promoter (<=1kb)	13	55097224	55153831	56608	1	ENSMUST00000026994.14	0	Unc5a
107568	chr4	19708990	19709310	321	*	samples_merged_q_0.05_peak_219	13.0818	29.6163	25.1709	Promoter (<=1kb)	4	19608303	19708993	100691	2	ENSMUST00000108246.9	0	Wwp1
108167613	chr1	9876107	9876353	247	*	samples_merged_q_0.05_peak_52	5.6688	8.86224	4.70051	Intron (ENSMUST00000166384.8/170755, intron 1 of 16)	1	9872422	9872778	357	2	ENSMUST00000063059.5	-3329	Gm6195
115485758	chr10	25136902	25137150	249	*	samples_merged_q_0.05_peak_111	4.79667	6.88523	2.80296	Intron (ENSMUST00000041984.14/432442, intron 5 of 7)	10	25141943	25142073	131	2	ENSMUST00000158399.3	4923	Gm25016
115485778	chr1	35492580	35492852	273	*	samples_merged_q_0.05_peak_54	5.6688	8.86224	4.70051	Distal Intergenic	1	35218037	35218165	129	2	ENSMUST00000104043.3	-274415	Gm25096
115487594	chr1	3059547	3059981	435	*	samples_merged_q_0.05_peak_50	4.79667	6.88523	2.80296	Distal Intergenic	1	3172239	3172348	110	1	ENSMUST00000082908.3	-112258	Gm26206
115487594	chr1	3067757	3068069	313	*	samples_merged_q_0.05_peak_51	4.36061	5.95087	1.93495	Distal Intergenic	1	3172239	3172348	110	1	ENSMUST00000082908.3	-104170	Gm26206
11774	chr13	94495288	94495529	242	*	samples_merged_q_0.05_peak_138	5.6688	8.86224	4.70051	Promoter (<=1kb)	13	94495468	94702825	207358	1	ENSMUST00000022196.5	0	Ap3b1
11839	chr5	91305086	91305359	274	*	samples_merged_q_0.05_peak_246	4.79667	6.88523	2.80296	Distal Intergenic	5	91287458	91296291	8834	1	ENSMUST00000031325.6	17628	Areg
12055	chr7	127307245	127307550	306	*	samples_merged_q_0.05_peak_264	6.54092	10.9665	6.7504	Promoter (<=1kb)	7	127304966	127307247	2282	2	ENSMUST00000144103.3	0	Bcl7c
14629	chr9	77657956	77658287	332	*	samples_merged_q_0.05_peak_289	7.8491	14.3272	10.0543	Distal Intergenic	9	77661817	77701767	39951	1	ENSMUST00000034905.9	-3530	Gclc
15925	chr19	37339650	37340720	1071	*	samples_merged_q_0.05_peak_203	25.2916	72.4455	67.6863	Promoter (<=1kb)	19	37246142	37340010	93869	2	ENSMUST00000131070.3	0	Ide
16337	chr8	3329424	3329799	376	*	samples_merged_q_0.05_peak_266	9.59335	19.1303	14.7991	Promoter (<=1kb)	8	3200922	3329617	128696	2	ENSMUST00000091291.5	0	Insr
16413	chr12	21335899	21336314	416	*	samples_merged_q_0.05_peak_129	8.28517	15.4958	11.2075	Promoter (<=1kb)	12	21317421	21336220	18800	2	ENSMUST00000232072.2	0	Itgb1bp1
16520	chr15	79390111	79390365	255	*	samples_merged_q_0.05_peak_172	5.23274	7.85664	3.73042	Promoter (<=1kb)	15	79367915	79389442	21528	2	ENSMUST00000057801.8	-669	Kcnj4
16558	chr2	142743183	142743611	429	*	samples_merged_q_0.05_peak_211	13.954	32.3906	27.9235	Promoter (<=1kb)	2	142459394	142743439	284046	2	ENSMUST00000230763.2	0	Kif16b
170942	chrY	90816098	90816446	349	*	samples_merged_q_0.05_peak_296	6.54092	10.9665	6.7504	Intron (ENSMUST00000179483.9/170942, intron 3 of 3)	21	90801720	90827734	26015	1	ENSMUST00000238471.2	14378	Erdr1x
17425	chr5	142353159	142353422	264	*	samples_merged_q_0.05_peak_251	6.97698	12.0611	7.82198	Distal Intergenic	5	142387252	142405375	18124	1	ENSMUST00000198422.2	-33830	Foxk1
17428	chr11	74721498	74721899	402	*	samples_merged_q_0.05_peak_119	12.2097	26.8988	22.4803	Promoter (<=1kb)	11	74721746	74736551	14806	1	ENSMUST00000000291.9	0	Mnt
17684	chr10	17597987	17598474	488	*	samples_merged_q_0.05_peak_109	16.5703	41.0215	36.488	Promoter (<=1kb)	10	17598966	17601422	2457	1	ENSMUST00000038107.9	-492	Cited2
17684	chr10	17598716	17599108	393	*	samples_merged_q_0.05_peak_110	10.9015	22.9381	18.5579	Promoter (<=1kb)	10	17598966	17601422	2457	1	ENSMUST00000038107.9	0	Cited2
18131	chr17	32384909	32385257	349	*	samples_merged_q_0.05_peak_189	12.2097	26.8988	22.4803	Promoter (<=1kb)	17	32339794	32385826	46033	2	ENSMUST00000087723.5	569	Notch3
18798	chr2	135500421	135500761	341	*	samples_merged_q_0.05_peak_210	10.9015	22.9381	18.5579	Promoter (<=1kb)	2	135500931	135584671	83741	1	ENSMUST00000144931.2	-170	Plcb4
19231	chr1	86415019	86415462	444	*	samples_merged_q_0.05_peak_57	11.7737	25.5627	21.1577	Distal Intergenic	1	86454448	86458434	3987	1	ENSMUST00000045897.15	-38986	Ptma
19231	chr1	86452843	86453085	243	*	samples_merged_q_0.05_peak_58	6.10486	9.89956	5.70893	Promoter (1-2kb)	1	86454448	86458434	3987	1	ENSMUST00000045897.15	-1363	Ptma
19664	chr5	53746654	53747025	372	*	samples_merged_q_0.05_peak_243	10.0294	20.3814	16.0315	Promoter (<=1kb)	5	53747556	53814704	67149	1	ENSMUST00000037618.13	-531	Rbpj
19664	chr5	53747564	53748008	445	*	samples_merged_q_0.05_peak_244	20.0588	53.1526	48.5327	Promoter (<=1kb)	5	53747710	53814704	66995	1	ENSMUST00000201912.4	0	Rbpj
19732	chr17	34148356	34148595	240	*	samples_merged_q_0.05_peak_190	6.97698	12.0611	7.82198	Promoter (<=1kb)	17	34148517	34149469	953	1	ENSMUST00000172468.2	0	Rgl2
20464	chr10	50903472	50903756	285	*	samples_merged_q_0.05_peak_112	4.36061	5.95087	1.93495	Distal Intergenic	10	50771747	50865248	93502	1	ENSMUST00000020071.4	131725	Sim1
208449	chr19	32365581	32366045	465	*	samples_merged_q_0.05_peak_200	20.4949	54.7133	50.0833	Promoter (<=1kb)	19	32100127	32365912	265786	2	ENSMUST00000099514.10	0	Sgms1
211623	chr14	25876927	25877341	415	*	samples_merged_q_0.05_peak_151	6.10486	9.89956	5.70893	Exon (ENSMUST00000022416.15/11744, exon 8 of 15)	14	25888828	25902898	14071	2	ENSMUST00000183431.8	25557	Plac9
211623	chr14	25887468	25887918	451	*	samples_merged_q_0.05_peak_152	6.10486	9.89956	5.70893	Downstream (<=300bp)	14	25888828	25902898	14071	2	ENSMUST00000183431.8	14980	Plac9
211623	chr14	25889391	25889798	408	*	samples_merged_q_0.05_peak_153	6.10486	9.89956	5.70893	Exon (ENSMUST00000052286.16/211623, exon 3 of 4)	14	25888828	25902898	14071	2	ENSMUST00000183431.8	13100	Plac9
211623	chr14	25891218	25891497	280	*	samples_merged_q_0.05_peak_154	4.79667	6.88523	2.80296	5' UTR	14	25888828	25902898	14071	2	ENSMUST00000183431.8	11401	Plac9
211623	chr14	25898270	25898660	391	*	samples_merged_q_0.05_peak_155	4.79667	6.88523	2.80296	Intron (ENSMUST00000052286.16/211623, intron 1 of 3)	14	25888828	25902898	14071	2	ENSMUST00000183431.8	4238	Plac9
211623	chr14	25909216	25909610	395	*	samples_merged_q_0.05_peak_156	5.6688	8.86224	4.70051	Distal Intergenic	14	25887930	25903524	15595	2	ENSMUST00000052286.16	-5692	Plac9
214290	chr13	59970633	59971130	498	*	samples_merged_q_0.05_peak_135	19.6228	51.6013	46.9901	Promoter (<=1kb)	13	59919375	59970961	51587	2	ENSMUST00000071703.6	0	Tut7
219249	chr14	87653615	87654153	539	*	samples_merged_q_0.05_peak_165	14.8261	35.2182	30.73	Promoter (<=1kb)	14	87654075	87752202	98128	1	ENSMUST00000169504.8	0	Tdrd3
22190	chr5	125466809	125467307	499	*	samples_merged_q_0.05_peak_247	22.2391	61.0455	56.3768	Promoter (<=1kb)	5	125463029	125467078	4050	2	ENSMUST00000136312.2	0	Ubc
22190	chr5	125469993	125470435	443	*	samples_merged_q_0.05_peak_248	8.72123	16.6866	12.3839	Promoter (2-3kb)	5	125463041	125467266	4226	2	ENSMUST00000156249.2	-2727	Ubc
22324	chr17	57596314	57596614	301	*	samples_merged_q_0.05_peak_192	5.23274	7.85664	3.73042	Intron (ENSMUST00000169220.9/22324, intron 2 of 27)	17	57586127	57634955	48829	1	ENSMUST00000112870.5	10187	Vav1
22324	chr17	57598795	57599061	267	*	samples_merged_q_0.05_peak_193	5.6688	8.86224	4.70051	Intron (ENSMUST00000169220.9/22324, intron 2 of 27)	17	57610064	57612346	2283	1	ENSMUST00000174878.2	-11003	Vav1
224613	chr17	23990470	23990717	248	*	samples_merged_q_0.05_peak_188	7.41304	13.1818	8.92338	Promoter (<=1kb)	17	23974394	23990496	16103	2	ENSMUST00000086325.13	0	Flywch1
231051	chr5	25704519	25704929	411	*	samples_merged_q_0.05_peak_242	12.6458	28.2502	23.8205	Promoter (<=1kb)	5	25587630	25703781	116152	2	ENSMUST00000172626.2	-738	Kmt2c
231327	chr5	77099396	77099733	338	*	samples_merged_q_0.05_peak_245	10.9015	22.9381	18.5579	Promoter (<=1kb)	5	77061096	77099419	38324	2	ENSMUST00000155272.8	0	Ppat
231861	chr5	142807191	142807491	301	*	samples_merged_q_0.05_peak_253	6.54092	10.9665	6.7504	Exon (ENSMUST00000243202.1/ENSMUST00000243202.1, exon 1 of 1)	5	142740544	142803417	62874	2	ENSMUST00000151477.8	-3774	Tnrc18
238871	chr13	109958838	109959231	394	*	samples_merged_q_0.05_peak_139	7.41304	13.1818	8.92338	Intron (ENSMUST00000122041.8/238871, intron 7 of 16)	13	109893755	109898146	4392	1	ENSMUST00000152630.2	65083	Pde4d
239985	chr17	5044321	5044772	452	*	samples_merged_q_0.05_peak_184	10.0294	20.3814	16.0315	Promoter (<=1kb)	17	5044607	5148008	103402	1	ENSMUST00000124362.2	0	Arid1b
240028	chr17	17844806	17845634	829	*	samples_merged_q_0.05_peak_187	7.8491	14.3272	10.0543	Promoter (<=1kb)	17	17741672	17845309	103638	2	ENSMUST00000041047.4	0	Lnpep
24063	chr3	37693817	37694251	435	*	samples_merged_q_0.05_peak_213	10.0294	20.3814	16.0315	Promoter (<=1kb)	3	37694096	37698747	4652	1	ENSMUST00000108109.8	0	Spry1
241296	chr2	30127584	30128001	418	*	samples_merged_q_0.05_peak_205	6.54092	10.9665	6.7504	Promoter (<=1kb)	2	30127727	30153797	26071	1	ENSMUST00000113654.8	0	Lrrc8a
260409	chr17	79663000	79663370	371	*	samples_merged_q_0.05_peak_195	8.28517	15.4958	11.2075	Promoter (<=1kb)	17	79641156	79662520	21365	2	ENSMUST00000068958.9	-480	Cdc42ep3
268567	chr12	79053613	79053940	328	*	samples_merged_q_0.05_peak_131	4.36061	5.95087	1.93495	Promoter (<=1kb)	12	79008574	79054051	45478	2	ENSMUST00000056660.13	111	Tmem229b
27375	chr10	81121492	81122030	539	*	samples_merged_q_0.05_peak_114	30.9604	94.5539	89.6664	Promoter (<=1kb)	10	81117021	81121603	4583	2	ENSMUST00000218484.2	0	Tjp3
278672	chr14	26001049	26001313	265	*	samples_merged_q_0.05_peak_161	5.23274	7.85664	3.73042	Distal Intergenic	14	25983429	25990512	7084	1	ENSMUST00000049793.9	17620	Duxbl1
328365	chr14	25459337	25459869	533	*	samples_merged_q_0.05_peak_150	23.1113	64.2628	59.5662	Promoter (<=1kb)	14	25459609	25538916	79308	1	ENSMUST00000161766.8	0	Zmiz1
328489	chr15	4025257	4025566	310	*	samples_merged_q_0.05_peak_167	6.10486	9.89956	5.70893	Promoter (<=1kb)	15	4025521	4045340	19820	1	ENSMUST00000180518.2	0	Gm2093
330814	chr8	84626158	84627011	854	*	samples_merged_q_0.05_peak_274	17.4425	43.992	39.4334	Promoter (<=1kb)	8	84626734	84668583	41850	1	ENSMUST00000141158.8	0	Adgrl1
338467	chr16	93629076	93629439	364	*	samples_merged_q_0.05_peak_181	7.41304	13.1818	8.92338	Promoter (<=1kb)	16	93629123	93641629	12507	1	ENSMUST00000201497.2	0	Morc3
380912	chr14	65581316	65581735	420	*	samples_merged_q_0.05_peak_163	9.59335	19.1303	14.7991	Distal Intergenic	14	65595838	65623837	28000	1	ENSMUST00000224623.2	-14103	Zfp395
414118	chr14	25458113	25458430	318	*	samples_merged_q_0.05_peak_149	9.15729	17.8984	13.5806	Promoter (<=1kb)	14	25257947	25458222	200276	2	ENSMUST00000225188.2	0	Zmiz1os1
433586	chr3	52012262	52012785	524	*	samples_merged_q_0.05_peak_214	11.7737	25.5627	21.1577	Promoter (<=1kb)	3	51593328	52012497	419170	2	ENSMUST00000121440.4	0	Maml3
53973	chr5	145698089	145698339	251	*	samples_merged_q_0.05_peak_254	5.6688	8.86224	4.70051	Distal Intergenic	5	145630859	145656946	26088	2	ENSMUST00000094111.6	-41143	Cyp3a41a
54006	chr7	140889914	140890148	235	*	samples_merged_q_0.05_peak_265	5.23274	7.85664	3.73042	Promoter (<=1kb)	7	140877386	140890833	13448	2	ENSMUST00000211146.2	685	Deaf1
54343	chr6	136445571	136445863	293	*	samples_merged_q_0.05_peak_260	10.4655	21.6509	17.2859	Distal Intergenic	6	136483165	136543756	60592	1	ENSMUST00000203988.3	-37302	Atf7ip
56364	chrX	100463397	100463697	301	*	samples_merged_q_0.05_peak_295	8.28517	15.4958	11.2075	Promoter (<=1kb)	20	100447990	100463404	15415	2	ENSMUST00000117901.8	0	Zmym3
66039	chr14	25922782	25923020	239	*	samples_merged_q_0.05_peak_157	4.36061	5.95087	1.93495	Distal Intergenic	14	25925181	25926212	1032	2	ENSMUST00000184129.2	3192	Tmem254
66070	chr9	14430599	14430836	238	*	samples_merged_q_0.05_peak_284	4.36061	5.95087	1.93495	Distal Intergenic	9	14419103	14421858	2756	1	ENSMUST00000216619.2	11496	Cwc15
66970	chr13	91608622	91609005	384	*	samples_merged_q_0.05_peak_136	16.5703	41.0215	36.488	Promoter (<=1kb)	13	91609169	91851548	242380	1	ENSMUST00000004094.15	-164	Ssbp2
67188	chr19	32366498	32366816	319	*	samples_merged_q_0.05_peak_201	7.41304	13.1818	8.92338	Promoter (<=1kb)	19	32366606	32368590	1985	1	ENSMUST00000181612.4	0	Sgms1os1
67556	chr1	172203830	172204111	282	*	samples_merged_q_0.05_peak_108	9.15729	17.8984	13.5806	Promoter (<=1kb)	1	172204113	172211666	7554	1	ENSMUST00000052455.4	-2	Pigm
68703	chr4	150456190	150456525	336	*	samples_merged_q_0.05_peak_240	9.59335	19.1303	14.7991	Intron (ENSMUST00000105682.9/68703, intron 1 of 22)	4	150490851	150554838	63988	1	ENSMUST00000131600.2	-34326	Rere
70885	chr8	69246294	69246738	445	*	samples_merged_q_0.05_peak_271	10.9015	22.9381	18.5579	Promoter (<=1kb)	8	69246581	69282062	35482	1	ENSMUST00000034328.13	0	Ints10
70942	chr19	26822595	26822940	346	*	samples_merged_q_0.05_peak_199	6.10486	9.89956	5.70893	Distal Intergenic	19	26746201	26801307	55107	2	ENSMUST00000177048.2	-21288	4931403E22Rik
71743	chr11	100973170	100973489	320	*	samples_merged_q_0.05_peak_123	8.28517	15.4958	11.2075	Promoter (<=1kb)	11	100973391	100977445	4055	1	ENSMUST00000001806.10	0	Coasy
71787	chr4	132056663	132056930	268	*	samples_merged_q_0.05_peak_222	6.97698	12.0611	7.82198	Promoter (<=1kb)	4	132039074	132056800	17727	2	ENSMUST00000105962.10	0	Trnau1ap
71876	chr8	47004686	47005167	482	*	samples_merged_q_0.05_peak_269	18.3146	47.0053	42.4224	Promoter (<=1kb)	8	47005063	47033042	27980	1	ENSMUST00000034045.15	0	Cenpu
74012	chr3	61271726	61272076	351	*	samples_merged_q_0.05_peak_215	10.4655	21.6509	17.2859	Promoter (2-3kb)	3	61269059	61275851	6793	1	ENSMUST00000049064.4	2667	Rap2b
74117	chr1	125363436	125363769	334	*	samples_merged_q_0.05_peak_107	11.3376	24.2422	19.8488	Promoter (<=1kb)	1	125320642	125363464	42823	2	ENSMUST00000027579.17	0	Actr3
75137	chr3	95726770	95727088	319	*	samples_merged_q_0.05_peak_216	8.72123	16.6866	12.3839	Promoter (<=1kb)	3	95691280	95726175	34896	2	ENSMUST00000198741.2	-595	Rprd2
75725	chr6	12021115	12021460	346	*	samples_merged_q_0.05_peak_257	4.36061	5.95087	1.93495	Intron (ENSMUST00000115511.9/75725, intron 16 of 17)	6	12006819	12081099	74281	1	ENSMUST00000203045.2	14296	Phf14
76108	chr14	120714973	120715355	383	*	samples_merged_q_0.05_peak_166	6.10486	9.89956	5.70893	Promoter (<=1kb)	14	120715856	120744606	28751	1	ENSMUST00000062117.14	-501	Rap2a
76890	chr17	74602390	74602622	233	*	samples_merged_q_0.05_peak_194	6.54092	10.9665	6.7504	Promoter (<=1kb)	17	74508066	74602491	94426	2	ENSMUST00000232987.2	0	Memo1
76959	chr4	40948330	40948710	381	*	samples_merged_q_0.05_peak_220	9.59335	19.1303	14.7991	Promoter (<=1kb)	4	40948407	40965303	16897	1	ENSMUST00000030128.6	0	Chmp5
78891	chr19	5821110	5821486	377	*	samples_merged_q_0.05_peak_197	6.10486	9.89956	5.70893	Promoter (<=1kb)	19	5808379	5821447	13069	2	ENSMUST00000236978.2	0	Scyl1
80707	chr8	115166171	115166579	409	*	samples_merged_q_0.05_peak_275	23.5473	65.8837	61.1722	Promoter (<=1kb)	8	115166395	116079447	913053	1	ENSMUST00000004756.14	0	Wwox
80859	chr16	55659144	55659449	306	*	samples_merged_q_0.05_peak_179	6.54092	10.9665	6.7504	Promoter (<=1kb)	16	55631738	55659262	27525	2	ENSMUST00000036273.13	0	Nfkbiz
93760	chr4	133481332	133482156	825	*	samples_merged_q_0.05_peak_223	39.6816	130.523	125.55	Promoter (<=1kb)	4	133416798	133481293	64496	2	ENSMUST00000138473.3	-39	Arid1a
93760	chr4	133484107	133484360	254	*	samples_merged_q_0.05_peak_224	6.97698	12.0611	7.82198	Promoter (<=1kb)	4	133407252	133484080	76829	2	ENSMUST00000008024.7	-27	Arid1a
93760	chr4	133484644	133485177	534	*	samples_merged_q_0.05_peak_225	11.3376	24.2422	19.8488	Promoter (<=1kb)	4	133407252	133484080	76829	2	ENSMUST00000008024.7	-564	Arid1a
99633	chr3	148695083	148695655	573	*	samples_merged_q_0.05_peak_217	7.8491	14.3272	10.0543	Promoter (<=1kb)	3	148659596	148695118	35523	2	ENSMUST00000198563.2	0	Adgrl2

## Sheet: Table S6
Table S6: Annotated Peaks for cKit-
geneId	seqnames	start	end	width	strand	peak_name	fold-change	"-log10pvalue"	"-log10qvalue"	annotation	geneChr	geneStart	geneEnd	geneLength	geneStrand	transcriptId	distanceToTSS	SYMBOL
100012	chr4	143897782	143898049	268	*	samples_merged_q_0.05_peak_4985	4.81862	6.30189	2.854	Distal Intergenic	4	143884127	143889233	5107	2	ENSMUST00000050933.9	-8549	Oog3
100038545	chr3	12637996	12638332	337	*	samples_merged_q_0.05_peak_4061	4.16383	5.12732	2.0456	Distal Intergenic	3	11888289	11909419	21131	2	ENSMUST00000192022.2	-728577	Gm10745
100038545	chr3	12638650	12639548	899	*	samples_merged_q_0.05_peak_4062	4.65997	6.20019	2.8211	Distal Intergenic	3	11888289	11909419	21131	2	ENSMUST00000192022.2	-729231	Gm10745
100038577	chr13	42032749	42033075	327	*	samples_merged_q_0.05_peak_1765	5.06303	6.84582	3.32814	Intron (ENSMUST00000221285.3/100038577, intron 1 of 6)	13	42019413	42066670	47258	1	ENSMUST00000241881.1	13336	Gm10790
100038743	chr2	66277760	66278112	353	*	samples_merged_q_0.05_peak_3680	4.8104	6.28808	2.854	Intron (ENSMUST00000141149.9/100038743, intron 1 of 2)	2	66271240	66341593	70354	1	ENSMUST00000152740.2	6520	Gm13629
100039026	chr1	156336685	156337130	446	*	samples_merged_q_0.05_peak_585	3.44546	3.91103	1.33468	Distal Intergenic	1	156351582	156354214	2633	1	ENSMUST00000190422.3	-14452	Csnk2a1-ps3
100039055	chrX	54645074	54645358	285	*	samples_merged_q_0.05_peak_7016	4.12126	5.05733	2.02812	Distal Intergenic	20	54598507	54613718	15212	1	ENSMUST00000177739.2	46567	Gm16404
100039120	chrX	26714523	26716114	1592	*	samples_merged_q_0.05_peak_6897	4.81862	6.30189	2.854	Distal Intergenic	20	26628077	26657938	29862	2	ENSMUST00000119649.2	-56585	Gm14525
100039548	chr3	23399856	23400161	306	*	samples_merged_q_0.05_peak_4117	3.42225	4.2824	1.44679	Distal Intergenic	3	23515214	23575562	60349	1	ENSMUST00000194267.2	-115053	4930412E21Rik
100039636	chr6	37708596	37708886	291	*	samples_merged_q_0.05_peak_5482	3.61397	4.18345	1.42191	Distal Intergenic	6	37783021	37783485	465	1	ENSMUST00000122373.2	-74135	Atp6v0c-ps2
100039636	chr6	37811400	37811672	273	*	samples_merged_q_0.05_peak_5483	3.61397	4.18345	1.42191	Distal Intergenic	6	37783021	37783485	465	1	ENSMUST00000122373.2	28379	Atp6v0c-ps2
100039795	chr1	166081801	166082131	331	*	samples_merged_q_0.05_peak_603	3.53251	4.05064	1.38591	Promoter (<=1kb)	1	166081762	166138839	57078	1	ENSMUST00000195557.6	39	Ildr2
100041294	chr10	31247040	31247334	295	*	samples_merged_q_0.05_peak_746	4.14219	5.21023	2.0456	Intron (ENSMUST00000000305.7/21987, intron 2 of 6)	10	31289811	31290161	351	2	ENSMUST00000214434.2	42827	Supt4b
100042218	chr19	19652317	19652823	507	*	samples_merged_q_0.05_peak_3412	4.14219	5.21023	2.0456	Distal Intergenic	19	19983304	19987508	4205	2	ENSMUST00000243433.1	334685	Gm3728
100042332	chr11	120076186	120076554	369	*	samples_merged_q_0.05_peak_1307	3.69655	4.5237	1.63575	Exon (ENSMUST00000155681.3/100042332, exon 2 of 2)	11	120078788	120080644	1857	2	ENSMUST00000244814.1	4090	Reno1
100042784	chr2	92845083	92845474	392	*	samples_merged_q_0.05_peak_3771	3.61397	4.18345	1.42191	Promoter (<=1kb)	2	92840318	92844255	3938	2	ENSMUST00000130441.2	-828	Prdm11
100043057	chr16	26334401	26334670	270	*	samples_merged_q_0.05_peak_2657	4.21629	5.21428	2.0456	Intron (ENSMUST00000231658.2/100043057, intron 3 of 3)	16	26323306	26345512	22207	2	ENSMUST00000165687.3	10842	Tmem207
100047482	chr5	124341747	124342073	327	*	samples_merged_q_0.05_peak_5329	4.16383	5.12732	2.0456	Intron (ENSMUST00000086123.11/19679, intron 1 of 23)	5	124333023	124338409	5387	1	ENSMUST00000162577.2	8724	Pitpnm2os2
100088	chr4	132072549	132073061	513	*	samples_merged_q_0.05_peak_4959	5.69551	8.31056	4.5373	Promoter (<=1kb)	4	132059230	132073058	13829	2	ENSMUST00000084250.11	0	Rcc1
100129	chr4	152367430	152367709	280	*	samples_merged_q_0.05_peak_5003	4.14219	5.21023	2.0456	Promoter (<=1kb)	4	152366827	152369793	2967	1	ENSMUST00000144035.2	603	Gpr153
100201	chr4	15265984	15266283	300	*	samples_merged_q_0.05_peak_4591	5.16979	7.22235	3.62896	Promoter (<=1kb)	4	15265831	15286753	20923	1	ENSMUST00000062684.9	153	Tmem64
100316674	chr5	34883273	34883605	333	*	samples_merged_q_0.05_peak_5085	4.21629	5.21428	2.0456	Intron (ENSMUST00000001112.14/14772, intron 9 of 15)	5	34890197	34890316	120	2	ENSMUST00000239889.1	6711	Mir467g
100316803	chr5	82836464	82836778	315	*	samples_merged_q_0.05_peak_5245	5.29877	7.23435	3.62896	Distal Intergenic	5	82946791	82946912	122	2	ENSMUST00000116936.3	110134	Mir1187
100417973	chr14	5166552	5166841	290	*	samples_merged_q_0.05_peak_1973	3.69655	4.5237	1.63575	Distal Intergenic	14	5363820	5364135	316	2	ENSMUST00000225472.2	197294	Pou5f1-rs6
100499528	chrX	161660377	161660784	408	*	samples_merged_q_0.05_peak_7649	4.62597	5.98233	2.69437	Promoter (2-3kb)	20	161657914	161657991	78	2	ENSMUST00000175011.3	-2386	Mir3473a
100502643	chr15	51240181	51240734	554	*	samples_merged_q_0.05_peak_2459	4.03366	4.91475	1.94829	Intron (ENSMUST00000226948.2/100502643, intron 1 of 5)	15	51095036	51259006	163971	2	ENSMUST00000226948.2	18272	Gm19303
100502917	chr11	38409646	38410023	378	*	samples_merged_q_0.05_peak_1168	4.16383	5.12732	2.0456	Promoter (<=1kb)	11	38384157	38410840	26684	2	ENSMUST00000133599.2	817	Gm12130
100502945	chr18	53791630	53792083	454	*	samples_merged_q_0.05_peak_3271	3.42225	4.2824	1.44679	Intron (ENSMUST00000236653.2/100502945, intron 1 of 3)	18	53781223	53838492	57270	1	ENSMUST00000235670.2	10407	Gm19466
100502946	chr2	170353544	170353876	333	*	samples_merged_q_0.05_peak_3989	4.11951	5.05447	2.02812	Promoter (<=1kb)	2	170341277	170353847	12571	2	ENSMUST00000126086.2	0	Gm16796
100503307	chr5	148941337	148941840	504	*	samples_merged_q_0.05_peak_5365	3.49322	4.58815	1.69071	Promoter (1-2kb)	5	148943737	148949592	5856	1	ENSMUST00000244958.1	-1897	Gm15408
100503530	chr13	25949559	25949866	308	*	samples_merged_q_0.05_peak_1727	5.88752	8.39308	4.58091	Distal Intergenic	13	26105016	26150299	45284	2	ENSMUST00000139335.3	200433	Gm11351
100503849	chr2	72809765	72810096	332	*	samples_merged_q_0.05_peak_3699	5.59952	8.15678	4.41458	Promoter (<=1kb)	2	72809768	72818786	9019	1	ENSMUST00000135297.8	0	Sp3os
100504101	chr12	61476281	61476606	326	*	samples_merged_q_0.05_peak_1488	6.02471	8.84331	4.9553	Distal Intergenic	12	61535887	61568578	32692	2	ENSMUST00000244322.1	91972	Gm20063
100504101	chr12	61527365	61527635	271	*	samples_merged_q_0.05_peak_1491	3.59477	4.15195	1.42191	Distal Intergenic	12	61535887	61568578	32692	2	ENSMUST00000244322.1	40943	Gm20063
100504140	chr11	60015177	60015591	415	*	samples_merged_q_0.05_peak_1209	3.69655	4.5237	1.63575	Intron (ENSMUST00000064190.13/19377, intron 1 of 5)	11	60003043	60006083	3041	2	ENSMUST00000130746.3	-9094	4930412M03Rik
100504191	chr15	79626625	79627055	431	*	samples_merged_q_0.05_peak_2562	3.80249	5.07751	2.04132	Promoter (<=1kb)	15	79626899	79641595	14697	1	ENSMUST00000128342.2	0	Gm16576
100504400	chrX	38877536	38877799	264	*	samples_merged_q_0.05_peak_6928	4.06946	5.28036	2.10866	Distal Intergenic	20	38951930	38952460	531	2	ENSMUST00000179096.3	74661	Cypt14-ps
100504692	chr3	74416517	74416775	259	*	samples_merged_q_0.05_peak_4297	5.29877	7.23435	3.62896	Distal Intergenic	3	73916550	73924610	8061	2	ENSMUST00000193390.2	-491907	Gm20356
100504701	chr6	79122218	79122504	287	*	samples_merged_q_0.05_peak_5643	4.12126	5.05733	2.02812	Distal Intergenic	6	79009027	79012852	3826	1	ENSMUST00000204808.2	113191	Gm20362
100504701	chr6	79305061	79305447	387	*	samples_merged_q_0.05_peak_5644	4.14219	5.21023	2.0456	Distal Intergenic	6	79009027	79012852	3826	1	ENSMUST00000204808.2	296034	Gm20362
100504728	chr2	117447598	117447945	348	*	samples_merged_q_0.05_peak_3869	4.65997	6.20019	2.8211	Distal Intergenic	2	117637159	117643294	6136	2	ENSMUST00000154409.2	195349	Gm13985
100526543	chr7	61371732	61372053	322	*	samples_merged_q_0.05_peak_5978	4.62069	6.35706	2.88522	Intron (ENSMUST00000208953.2/319893, intron 5 of 5)	7	61375997	61376076	80	2	ENSMUST00000239568.1	4023	Mir344d-3
100579137	chr5	144336087	144336345	259	*	samples_merged_q_0.05_peak_5358	4.65997	6.20019	2.8211	Intron (ENSMUST00000155491.8/55950, intron 3 of 3)	5	144295335	144297815	2481	1	ENSMUST00000196478.5	40752	Dmrt1i
100628572	chr9	3116738	3116999	262	*	samples_merged_q_0.05_peak_6484	3.48161	3.96873	1.37569	Distal Intergenic	9	3038669	3038743	75	2	ENSMUST00000195989.2	-77995	Mir101c
100628616	chr10	97117325	97117597	273	*	samples_merged_q_0.05_peak_945	3.62442	4.27018	1.44233	Distal Intergenic	10	97259340	97259424	85	1	ENSMUST00000198473.3	-141743	Mir3966
100683	chr5	144705239	144705736	498	*	samples_merged_q_0.05_peak_5359	4.59394	5.92998	2.64904	Promoter (<=1kb)	5	144705354	144713938	8585	1	ENSMUST00000128550.8	0	Trrap
100862203	chr17	17527615	17528056	442	*	samples_merged_q_0.05_peak_2889	5.08276	7.33658	3.70729	Intron (ENSMUST00000186431.8/100862203, intron 1 of 3)	17	17536340	17539773	3434	1	ENSMUST00000105311.4	-8284	Gm6712
100972	chr5	41065662	41066036	375	*	samples_merged_q_0.05_peak_5101	5.5318	7.80499	4.08642	Distal Intergenic	5	41783076	41784845	1770	2	ENSMUST00000200702.2	718809	Rab28
101055769	chr4	59279494	59279763	270	*	samples_merged_q_0.05_peak_4740	5.29877	7.23435	3.62896	Distal Intergenic	4	59260051	59265577	5527	1	ENSMUST00000243061.1	19443	Gm12596
102141	chr8	46604913	46605323	411	*	samples_merged_q_0.05_peak_6272	5.54482	8.35324	4.56454	Promoter (<=1kb)	8	46486298	46605196	118899	2	ENSMUST00000110378.9	0	Snx25
102465174	chr1	30054387	30054669	283	*	samples_merged_q_0.05_peak_172	4.12126	5.05733	2.02812	Distal Intergenic	1	29460569	29460693	125	1	ENSMUST00000183870.3	593818	Mir6342
102465219	chr11	67986987	67987376	390	*	samples_merged_q_0.05_peak_1220	4.47016	5.7295	2.47801	Intron (ENSMUST00000021285.14/55943, intron 6 of 7)	11	68111718	68111837	120	1	ENSMUST00000183592.3	-124342	Mir6406
102465222	chr10	104094406	104094709	304	*	samples_merged_q_0.05_peak_965	4.14219	5.21023	2.0456	Distal Intergenic	10	104123130	104123237	108	1	ENSMUST00000183556.3	-28421	Mir6411
102465963	chrX	105377019	105377336	318	*	samples_merged_q_0.05_peak_7363	3.61397	4.18345	1.42191	Distal Intergenic	20	105353432	105353541	110	1	ENSMUST00000240300.1	23587	Mir6382
102466155	chr3	35027772	35028188	417	*	samples_merged_q_0.05_peak_4148	4.81862	6.30189	2.854	Distal Intergenic	3	34976694	34976800	107	2	ENSMUST00000183357.3	-50972	Mir6378
102631616	chr2	173221096	173221483	388	*	samples_merged_q_0.05_peak_3992	4.64215	6.00885	2.71762	Distal Intergenic	2	173236359	173237513	1155	1	ENSMUST00000147357.2	-14876	Gm14642
102631647	chr1	5042827	5043094	268	*	samples_merged_q_0.05_peak_52	4.25517	5.38741	2.20519	Promoter (1-2kb)	1	5041080	5047043	5964	1	ENSMUST00000144339.2	1747	Gm16041
102631833	chr2	129353888	129354229	342	*	samples_merged_q_0.05_peak_3906	3.42225	4.2824	1.44679	Intron (ENSMUST00000050309.6/228592, intron 1 of 6)	2	129335490	129357727	22238	2	ENSMUST00000139058.2	3498	Gm14040
102631866	chr4	17585535	17585894	360	*	samples_merged_q_0.05_peak_4604	4.65997	6.20019	2.8211	Intron (ENSMUST00000245354.1/102631866, intron 1 of 2)	4	17546447	17636191	89745	2	ENSMUST00000245354.1	50297	Gm30092
102631866	chr4	17629825	17630131	307	*	samples_merged_q_0.05_peak_4606	4.14219	5.21023	2.0456	Intron (ENSMUST00000245354.1/102631866, intron 1 of 2)	4	17546447	17636191	89745	2	ENSMUST00000245354.1	6060	Gm30092
102631935	chr2	108714041	108714355	315	*	samples_merged_q_0.05_peak_3839	3.75467	4.7953	1.8549	Distal Intergenic	2	108853032	108855789	2758	1	ENSMUST00000153283.2	-138677	Gm13923
102632039	chr14	53694641	53694952	312	*	samples_merged_q_0.05_peak_2071	4.81862	6.30189	2.854	Distal Intergenic	14	53269874	53276923	7050	2	ENSMUST00000199271.2	-417718	Gm30214
102632292	chr12	112841108	112841460	353	*	samples_merged_q_0.05_peak_1626	5.29652	7.23059	3.62896	Promoter (1-2kb)	12	112838841	112839321	481	2	ENSMUST00000223214.2	-1787	1700127F24Rik
102632299	chr13	106240773	106241118	346	*	samples_merged_q_0.05_peak_1919	4.57809	5.90416	2.63075	Distal Intergenic	13	106883578	106898087	14510	2	ENSMUST00000225713.2	656969	Gm30411
102632401	chr3	133644946	133645215	270	*	samples_merged_q_0.05_peak_4483	4.58904	6.55746	3.06387	Intron (ENSMUST00000200444.2/102632484, intron 1 of 2)	3	133521680	133524279	2600	2	ENSMUST00000200327.2	-120667	Gm30484
102632403	chrX	95589477	95589741	265	*	samples_merged_q_0.05_peak_7308	4.14219	5.21023	2.0456	Intron (ENSMUST00000033553.14/15203, intron 16 of 21)	20	95528465	95529085	621	1	ENSMUST00000118924.2	61012	Rpl17-ps8
102632436	chr4	20464381	20464682	302	*	samples_merged_q_0.05_peak_4619	4.69137	6.08989	2.78461	Intron (ENSMUST00000119374.8/269513, intron 3 of 5)	4	20343706	20347818	4113	1	ENSMUST00000141819.2	120675	Gm11872
102632928	chr8	7048945	7049439	495	*	samples_merged_q_0.05_peak_6190	3.62442	4.27018	1.44233	Distal Intergenic	8	7431015	7478569	47555	1	ENSMUST00000170074.2	-381576	Gm17215
102633001	chr9	30274150	30274432	283	*	samples_merged_q_0.05_peak_6586	5.42341	8.46807	4.64597	Distal Intergenic	9	30297276	30338272	40997	2	ENSMUST00000217174.2	63840	Gm30933
102633152	chr9	90916467	90916859	393	*	samples_merged_q_0.05_peak_6715	4.59394	5.92998	2.64904	Distal Intergenic	9	90707355	90710913	3559	2	ENSMUST00000185312.2	-205554	Gm28703
102633236	chr2	48356547	48356815	269	*	samples_merged_q_0.05_peak_3634	6.27324	9.25258	5.347	Distal Intergenic	2	48270058	48347278	77221	2	ENSMUST00000244853.1	-9269	Gm13481
102633258	chr13	50425899	50426168	270	*	samples_merged_q_0.05_peak_1777	4.71002	6.12072	2.78461	Intron (ENSMUST00000222366.2/102633258, intron 1 of 3)	13	50422012	50430706	8695	1	ENSMUST00000222366.2	3887	Gm31126
102633331	chr10	114722582	114722866	285	*	samples_merged_q_0.05_peak_1001	4.15862	5.41808	2.20975	Distal Intergenic	10	114710912	114721036	10125	1	ENSMUST00000219061.2	11670	Gm31182
102633392	chr14	68640884	68641263	380	*	samples_merged_q_0.05_peak_2105	4.94564	6.65564	3.15578	Distal Intergenic	14	68699080	68733866	34787	1	ENSMUST00000225482.2	-57817	Gm31227
102633438	chr2	114757962	114758281	320	*	samples_merged_q_0.05_peak_3863	4.12126	5.05733	2.02812	Intron (ENSMUST00000144368.2/102633438, intron 5 of 8)	2	114684574	114874453	189880	1	ENSMUST00000144368.2	73388	Gm13974
102633682	chr12	68447800	68448092	293	*	samples_merged_q_0.05_peak_1519	4.81862	6.30189	2.854	Intron (ENSMUST00000220867.2/ENSMUST00000220867.2, intron 1 of 2)	12	69176610	69191850	15241	1	ENSMUST00000222345.2	-728518	Gm31447
102633826	chr9	46524552	46524942	391	*	samples_merged_q_0.05_peak_6630	3.61397	4.18345	1.42191	Distal Intergenic	9	46518553	46524024	5472	1	ENSMUST00000217349.2	5999	Gm31557
102634169	chr4	29535734	29536052	319	*	samples_merged_q_0.05_peak_4669	4.62069	6.35706	2.88522	Distal Intergenic	4	29068079	29088811	20733	1	ENSMUST00000154813.2	467655	Gm11917
102634187	chr5	10237769	10238054	286	*	samples_merged_q_0.05_peak_5043	4.21629	5.21428	2.0456	Exon (ENSMUST00000190891.7/ENSMUST00000190891.7, exon 1 of 3)	5	10299059	10399375	100317	1	ENSMUST00000198581.2	-61005	Gm31831
102634258	chr13	19414538	19414797	260	*	samples_merged_q_0.05_peak_1715	3.33748	3.97873	1.37569	Distal Intergenic	13	19346206	19377728	31523	2	ENSMUST00000197661.2	-36810	Gm31887
102634341	chr13	78581898	78582172	275	*	samples_merged_q_0.05_peak_1841	3.69655	4.5237	1.63575	Intron (ENSMUST00000225497.2/102634341, intron 1 of 2)	13	78575367	78590643	15277	1	ENSMUST00000225497.2	6531	Gm31946
102634664	chr16	25015556	25015962	407	*	samples_merged_q_0.05_peak_2656	5.17774	7.23502	3.62896	Distal Intergenic	16	24963558	24996835	33278	2	ENSMUST00000241640.1	-18721	Gm32196
102634780	chr17	77531443	77531821	379	*	samples_merged_q_0.05_peak_3073	4.62597	5.98233	2.69437	Distal Intergenic	17	78506685	78507454	770	2	ENSMUST00000234450.2	975633	Gm32282
102634783	chr4	71065934	71066443	510	*	samples_merged_q_0.05_peak_4777	4.65997	6.20019	2.8211	Distal Intergenic	4	70993346	71049370	56025	2	ENSMUST00000143796.2	-16564	Gm11228
102634852	chr4	71832153	71832499	347	*	samples_merged_q_0.05_peak_4782	4.14219	5.21023	2.0456	Distal Intergenic	4	71673880	71676202	2323	2	ENSMUST00000084489.3	-155951	Gm11232
102634880	chr16	85899008	85899486	479	*	samples_merged_q_0.05_peak_2843	4.64215	6.00885	2.71762	Distal Intergenic	16	86033059	86066038	32980	1	ENSMUST00000231827.2	-133573	Gm32357
102634888	chr10	67435651	67435910	260	*	samples_merged_q_0.05_peak_871	4.57809	5.90416	2.63075	Distal Intergenic	10	67411713	67422217	10505	1	ENSMUST00000218174.2	23938	Gm32364
102634993	chr12	5662773	5663211	439	*	samples_merged_q_0.05_peak_1323	4.15862	5.41808	2.20975	Distal Intergenic	12	5858195	6034547	176353	1	ENSMUST00000219369.2	-194984	Gm32442
102635347	chr9	10793784	10794131	348	*	samples_merged_q_0.05_peak_6523	4.81862	6.30189	2.854	Intron (ENSMUST00000162484.8/244682, intron 1 of 20)	9	10904350	10907823	3474	1	ENSMUST00000210677.2	-110219	Gm32710
102635347	chr9	10846362	10846622	261	*	samples_merged_q_0.05_peak_6524	4.75866	6.20152	2.8211	Intron (ENSMUST00000162484.8/244682, intron 1 of 20)	9	10904350	10907823	3474	1	ENSMUST00000210677.2	-57728	Gm32710
102635461	chr1	77584935	77585269	335	*	samples_merged_q_0.05_peak_316	6.10857	9.25453	5.34881	Distal Intergenic	1	77498961	77533210	34250	1	ENSMUST00000246015.1	85974	Gm32793
102635592	chr7	128491083	128491418	336	*	samples_merged_q_0.05_peak_6145	3.53251	4.05064	1.38591	Intron (ENSMUST00000205528.2/102635592, intron 4 of 5)	7	128396918	128529737	132820	1	ENSMUST00000205528.2	94165	Gm32884
102636890	chr4	37349174	37349441	268	*	samples_merged_q_0.05_peak_4690	4.21629	5.21428	2.0456	Distal Intergenic	4	37249403	37332515	83113	1	ENSMUST00000147108.2	99771	Gm12374
102636890	chr4	37601291	37601702	412	*	samples_merged_q_0.05_peak_4693	4.65997	6.20019	2.8211	Distal Intergenic	4	37249403	37332515	83113	1	ENSMUST00000147108.2	351888	Gm12374
102637039	chr18	29123273	29123538	266	*	samples_merged_q_0.05_peak_3201	4.50047	5.77834	2.52161	Intron (ENSMUST00000234127.2/320624, intron 2 of 2)	18	29005278	29030040	24763	1	ENSMUST00000234160.2	117995	Gm33948
102637329	chr8	122590146	122590444	299	*	samples_merged_q_0.05_peak_6465	4.2091	5.20232	2.0456	Distal Intergenic	8	122578622	122587064	8443	1	ENSMUST00000181647.2	11524	Gm26812
102637603	chr8	60002723	60003099	377	*	samples_merged_q_0.05_peak_6311	3.53251	4.05064	1.38591	Distal Intergenic	8	59872340	59904547	32208	1	ENSMUST00000209385.2	130383	Gm34370
102637916	chr10	72047602	72048099	498	*	samples_merged_q_0.05_peak_873	4.21629	5.21428	2.0456	Distal Intergenic	10	71862812	71947608	84797	1	ENSMUST00000219284.2	184790	Gm34609
102638082	chr8	61085749	61086100	352	*	samples_merged_q_0.05_peak_6316	5.88752	8.39308	4.58091	Promoter (<=1kb)	8	61069450	61085765	16316	2	ENSMUST00000210674.2	0	Gm34730
102638120	chr14	103584042	103584402	361	*	samples_merged_q_0.05_peak_2209	3.33748	3.97873	1.37569	Promoter (<=1kb)	14	103584323	103597922	13600	1	ENSMUST00000240785.1	0	Gm34758
102638151	chr12	91611554	91611813	260	*	samples_merged_q_0.05_peak_1565	4.65844	6.03562	2.74042	Intron (ENSMUST00000052969.15/108800, intron 5 of 6)	12	91651439	91660364	8926	1	ENSMUST00000151945.2	-39626	Gm16876
102638611	chr12	52530289	52530640	352	*	samples_merged_q_0.05_peak_1463	4.62069	6.35706	2.88522	Promoter (2-3kb)	12	52522522	52527392	4871	2	ENSMUST00000219885.2	-2897	Gm35135
102638614	chr4	98518718	98518977	260	*	samples_merged_q_0.05_peak_4882	4.65997	6.20019	2.8211	Intron (ENSMUST00000041284.10/12695, intron 31 of 43)	4	98585130	98587392	2263	2	ENSMUST00000245903.1	68415	Gm35137
102638690	chr5	40861383	40861643	261	*	samples_merged_q_0.05_peak_5099	4.67485	6.06263	2.7635	Distal Intergenic	5	40133014	40142971	9958	2	ENSMUST00000200925.2	-718412	Gm35191
102638742	chr18	60164647	60164975	329	*	samples_merged_q_0.05_peak_3278	4.21629	5.21428	2.0456	Distal Intergenic	18	59958503	59988534	30032	2	ENSMUST00000237574.2	-176113	Gm35234
102638832	chr1	122235943	122236303	361	*	samples_merged_q_0.05_peak_480	3.44546	3.91103	1.33468	Distal Intergenic	1	122132874	122179909	47036	1	ENSMUST00000185679.2	103069	Gm28590
102638940	chr12	110460964	110461324	361	*	samples_merged_q_0.05_peak_1619	6.02328	8.62283	4.74735	Intron (ENSMUST00000220509.2/26931, intron 3 of 7)	12	110445634	110452649	7016	2	ENSMUST00000247235.1	-8315	Gm19605
102638951	chr6	60480096	60480362	267	*	samples_merged_q_0.05_peak_5558	5.15036	6.98864	3.45714	Distal Intergenic	6	60563762	60568173	4412	1	ENSMUST00000204603.2	-83400	Gm35386
102639043	chr1	63312170	63312775	606	*	samples_merged_q_0.05_peak_288	4.65844	6.03562	2.74042	Promoter (<=1kb)	1	63306007	63312274	6268	2	ENSMUST00000153049.8	0	Gm11608
102639135	chr8	16860263	16860557	295	*	samples_merged_q_0.05_peak_6199	4.21629	5.21428	2.0456	Intron (ENSMUST00000082104.7/94109, intron 3 of 69)	8	16483200	16487054	3855	1	ENSMUST00000131707.2	377063	Gm16347
102639181	chr10	47030983	47031355	373	*	samples_merged_q_0.05_peak_806	3.75467	4.7953	1.8549	Distal Intergenic	10	46892675	46978928	86254	2	ENSMUST00000214355.3	-52055	Gm35552
102639396	chr10	100586014	100586429	416	*	samples_merged_q_0.05_peak_955	5.42095	7.43979	3.75036	Distal Intergenic	10	100543397	100577497	34101	2	ENSMUST00000218270.2	-8517	Gm35722
102639811	chr17	15797765	15798048	284	*	samples_merged_q_0.05_peak_2875	4.21629	5.21428	2.0456	Distal Intergenic	17	15786426	15786683	258	2	ENSMUST00000178455.3	-11082	Gm6686
102639906	chr14	106477200	106477468	269	*	samples_merged_q_0.05_peak_2218	4.12126	5.05733	2.02812	Distal Intergenic	14	106502726	106508682	5957	1	ENSMUST00000227226.2	-25258	Gm36107
102640230	chr1	129628310	129628574	265	*	samples_merged_q_0.05_peak_501	4.03523	5.04385	2.02812	Intron (ENSMUST00000073527.13/210417, intron 7 of 27)	1	129536468	129543952	7485	2	ENSMUST00000247553.1	-84358	Gm36347
102640344	chr15	77945592	77945881	290	*	samples_merged_q_0.05_peak_2559	3.61397	4.18345	1.42191	Intron (ENSMUST00000019290.3/12300, intron 1 of 3)	15	78003906	78028342	24437	1	ENSMUST00000174277.2	-58025	A730060N03Rik
102640559	chr17	70050160	70050469	310	*	samples_merged_q_0.05_peak_3052	4.14219	5.21023	2.0456	Distal Intergenic	17	70200755	70230990	30236	2	ENSMUST00000232745.2	180521	Gm36594
102640559	chr17	70121799	70122069	271	*	samples_merged_q_0.05_peak_3054	4.71002	6.12072	2.78461	Distal Intergenic	17	70200755	70230990	30236	2	ENSMUST00000232745.2	108921	Gm36594
102640655	chr6	16772508	16772771	264	*	samples_merged_q_0.05_peak_5424	4.65997	6.20019	2.8211	Distal Intergenic	6	16777523	16788819	11297	1	ENSMUST00000201757.2	-4752	Gm36669
102640656	chr8	92707795	92708071	277	*	samples_merged_q_0.05_peak_6407	4.8104	6.28808	2.854	Intron (ENSMUST00000210400.2/102640656, intron 2 of 2)	8	92700723	92718497	17775	2	ENSMUST00000210400.2	10426	Gm36670
102640718	chr10	124716746	124717018	273	*	samples_merged_q_0.05_peak_1020	5.33607	7.48836	3.79617	Distal Intergenic	10	124831888	124855706	23819	1	ENSMUST00000219518.2	-114870	Gm36719
102640859	chr10	56905568	56905863	296	*	samples_merged_q_0.05_peak_853	4.21629	5.21428	2.0456	Distal Intergenic	10	56846425	56858328	11904	2	ENSMUST00000220080.2	-47240	Gm36827
102640900	chr9	88132594	88132863	270	*	samples_merged_q_0.05_peak_6701	4.15862	5.41808	2.20975	Distal Intergenic	9	88141948	88145088	3141	1	ENSMUST00000190118.2	-9085	Gm28231
102641516	chrX	162772193	162772481	289	*	samples_merged_q_0.05_peak_7657	5.29652	7.23059	3.62896	Intron (ENSMUST00000033739.5/56078, intron 5 of 7)	20	162741746	162756067	14322	1	ENSMUST00000245819.1	30447	Gm38561
102642386	chr7	41238560	41238858	299	*	samples_merged_q_0.05_peak_5905	3.54358	4.06856	1.40022	Distal Intergenic	7	41195098	41223086	27989	2	ENSMUST00000110214.9	-15474	Gm6871
102642832	chr13	49023780	49024065	286	*	samples_merged_q_0.05_peak_1773	5.17774	7.23502	3.62896	Promoter (<=1kb)	13	49024588	49028936	4349	1	ENSMUST00000123212.2	-523	Phf2os1
103551	chr11	97527522	97527902	381	*	samples_merged_q_0.05_peak_1266	4.21629	5.21428	2.0456	Distal Intergenic	11	97518215	97520528	2314	2	ENSMUST00000052281.6	-6994	Epop
103677	chr11	74975250	74975644	395	*	samples_merged_q_0.05_peak_1236	4.21629	5.21428	2.0456	Intron (ENSMUST00000045281.13/103677, intron 13 of 18)	11	75023261	75030195	6935	1	ENSMUST00000142038.2	-47617	Smg6
104099	chr9	118435607	118435934	328	*	samples_merged_q_0.05_peak_6770	4.65997	6.20019	2.8211	Promoter (<=1kb)	9	118435758	118730071	294314	1	ENSMUST00000044165.14	0	Itga9
104103	chr17	12948163	12948512	350	*	samples_merged_q_0.05_peak_2872	4.81862	6.30189	2.854	Intron (ENSMUST00000024599.14/16004, intron 7 of 47)	17	12960198	13079023	118826	1	ENSMUST00000160932.3	-11686	Airn
104215	chr17	87270419	87270888	470	*	samples_merged_q_0.05_peak_3088	4.15862	5.41808	2.20975	Promoter (<=1kb)	17	87270510	87307497	36988	1	ENSMUST00000024956.15	0	Rhoq
104318	chr11	120881494	120881889	396	*	samples_merged_q_0.05_peak_1311	4.71002	6.12072	2.78461	Promoter (<=1kb)	11	120863298	120881697	18400	2	ENSMUST00000154483.8	0	Csnk1d
104383	chr19	7245648	7245999	352	*	samples_merged_q_0.05_peak_3364	5.08026	6.8739	3.35393	Promoter (<=1kb)	19	7245644	7252590	6947	1	ENSMUST00000066646.12	4	Rcor2
104681	chr11	109356598	109356924	327	*	samples_merged_q_0.05_peak_1294	3.49322	4.58815	1.69071	Promoter (<=1kb)	11	109349324	109357185	7862	2	ENSMUST00000032206.9	261	Slc16a6
105242389	chr1	80403888	80404181	294	*	samples_merged_q_0.05_peak_325	5.42095	7.43979	3.75036	Promoter (1-2kb)	1	80405912	80457752	51841	1	ENSMUST00000247629.1	-1731	Gm38673
105242656	chr6	51732398	51732679	282	*	samples_merged_q_0.05_peak_5527	5.42095	7.43979	3.75036	Distal Intergenic	6	51671289	51688061	16773	2	ENSMUST00000203781.2	-44337	Gm38811
105242741	chr6	114374684	114375199	516	*	samples_merged_q_0.05_peak_5724	5.29877	7.23435	3.62896	Promoter (<=1kb)	6	114333216	114374752	41537	2	ENSMUST00000243748.1	0	Gm38875
105243058	chr7	127273228	127273577	350	*	samples_merged_q_0.05_peak_6143	4.21629	5.21428	2.0456	Intron (ENSMUST00000106282.8/12055, intron 4 of 4)	7	127291102	127300814	9713	1	ENSMUST00000246564.1	-17525	Gm39090
105243191	chr8	53668836	53669126	291	*	samples_merged_q_0.05_peak_6291	3.75467	4.7953	1.8549	Distal Intergenic	8	53889135	53933533	44399	1	ENSMUST00000210964.2	-220009	Gm39180
105243951	chr1	67632523	67632855	333	*	samples_merged_q_0.05_peak_297	5.42095	7.43979	3.75036	Distal Intergenic	1	67831640	67844483	12844	1	ENSMUST00000147834.2	-198785	Gm15669
105243951	chr1	67746041	67746357	317	*	samples_merged_q_0.05_peak_299	4.06188	4.96047	1.98601	Distal Intergenic	1	67831640	67844483	12844	1	ENSMUST00000147834.2	-85283	Gm15669
105244580	chr3	147280205	147280464	260	*	samples_merged_q_0.05_peak_4512	4.81862	6.30189	2.854	Distal Intergenic	3	147134525	147138925	4401	1	ENSMUST00000195873.2	145680	Gm37041
105244580	chr3	147356649	147356908	260	*	samples_merged_q_0.05_peak_4513	4.21629	5.21428	2.0456	Distal Intergenic	3	147134525	147138925	4401	1	ENSMUST00000195873.2	222124	Gm37041
105244624	chr4	95060528	95060870	343	*	samples_merged_q_0.05_peak_4871	4.5312	5.82802	2.565	Distal Intergenic	4	95081512	95096801	15290	1	ENSMUST00000241996.1	-20642	Gm12708
105244893	chr12	51009858	51010206	349	*	samples_merged_q_0.05_peak_1459	5.18613	7.04752	3.50847	Distal Intergenic	12	51032083	51051656	19574	2	ENSMUST00000218991.2	41450	Gm40421
105244994	chr9	36227712	36228019	308	*	samples_merged_q_0.05_peak_6602	5.01204	6.76298	3.25496	Distal Intergenic	9	36167227	36169619	2393	2	ENSMUST00000181639.3	-58093	Gm3867
105245024	chr12	90410457	90411184	728	*	samples_merged_q_0.05_peak_1558	4.15862	5.41808	2.20975	Distal Intergenic	12	90366441	90375598	9158	2	ENSMUST00000220610.2	-34859	Gm40538
105245041	chr12	96667926	96668223	298	*	samples_merged_q_0.05_peak_1585	4.62069	6.35706	2.88522	Distal Intergenic	12	97279623	97282627	3005	1	ENSMUST00000218233.2	-611400	Gm40552
105245225	chr10	78187934	78188334	401	*	samples_merged_q_0.05_peak_890	3.75467	4.7953	1.8549	Promoter (<=1kb)	10	78188308	78189134	827	1	ENSMUST00000219014.2	0	Gm40709
105245289	chr10	113515419	113515740	322	*	samples_merged_q_0.05_peak_997	4.10495	5.03064	2.02812	Distal Intergenic	10	113387536	113398668	11133	2	ENSMUST00000218612.2	-116751	Gm40765
105245829	chr14	81303306	81303626	321	*	samples_merged_q_0.05_peak_2129	4.21629	5.21428	2.0456	Distal Intergenic	14	81923250	81958568	35319	1	ENSMUST00000227374.2	-619624	Gm41219
105245890	chr15	11650055	11650360	306	*	samples_merged_q_0.05_peak_2317	4.65997	6.20019	2.8211	Distal Intergenic	15	11696896	11703789	6894	2	ENSMUST00000228108.2	53429	Gm41271
105246418	chr18	40196257	40196538	282	*	samples_merged_q_0.05_peak_3226	5.17774	7.23502	3.62896	Distal Intergenic	18	40039233	40062427	23195	2	ENSMUST00000237624.2	-133830	Gm41708
105246441	chr18	54636123	54636404	282	*	samples_merged_q_0.05_peak_3273	4.64215	6.00885	2.71762	Distal Intergenic	18	54627765	54629656	1892	2	ENSMUST00000237202.2	-6467	4933434P08Rik
105246541	chr19	19537406	19537724	319	*	samples_merged_q_0.05_peak_3411	5.68341	8.05341	4.31876	Distal Intergenic	19	19253835	19297015	43181	1	ENSMUST00000237424.2	283571	Gm41815
105247182	chr4	133540868	133541267	400	*	samples_merged_q_0.05_peak_4966	8.34371	16.059	11.6145	Promoter (2-3kb)	4	133543731	133544925	1195	1	ENSMUST00000129875.2	-2464	Gm12974
105247217	chr4	149887161	149887431	271	*	samples_merged_q_0.05_peak_4997	4.09049	5.00703	2.0233	Distal Intergenic	4	149864481	149865171	691	2	ENSMUST00000134059.2	-21990	Gm13073
105439	chr14	103887880	103888140	261	*	samples_merged_q_0.05_peak_2210	3.62442	4.27018	1.44233	Promoter (<=1kb)	14	103888082	103941746	53665	1	ENSMUST00000160805.8	0	Slain1
105500046	chr4	22542362	22543179	818	*	samples_merged_q_0.05_peak_4632	4.81862	6.30189	2.854	Distal Intergenic	4	22490548	22493126	2579	1	ENSMUST00000203909.2	51814	Gm30731
105522	chr14	31552435	31552980	546	*	samples_merged_q_0.05_peak_2020	7.31327	11.5275	7.38335	Promoter (<=1kb)	14	31420725	31552608	131884	2	ENSMUST00000014640.9	0	Ankrd28
105651	chr14	55114241	55114722	482	*	samples_merged_q_0.05_peak_2073	5.42341	8.46807	4.64597	Promoter (<=1kb)	14	55113054	55114995	1942	2	ENSMUST00000168622.2	273	Ppp1r3e
105689	chr14	103561503	103561821	319	*	samples_merged_q_0.05_peak_2208	4.58904	6.55746	3.06387	Intron (ENSMUST00000160758.8/105689, intron 1 of 82)	14	103350847	103583854	233008	2	ENSMUST00000160758.8	22033	Mycbp2
106042	chr15	93417183	93417457	275	*	samples_merged_q_0.05_peak_2583	3.61397	4.18345	1.42191	Promoter (<=1kb)	15	93396995	93417404	20410	2	ENSMUST00000109255.3	0	Prickle1
106042	chr15	93493573	93493903	331	*	samples_merged_q_0.05_peak_2584	6.25175	9.2169	5.31326	Promoter (<=1kb)	15	93396995	93493772	96778	2	ENSMUST00000048982.11	0	Prickle1
106585	chr17	66383560	66384179	620	*	samples_merged_q_0.05_peak_3047	3.55352	4.89506	1.93283	Promoter (<=1kb)	17	66272693	66384068	111376	2	ENSMUST00000038116.13	0	Ankrd12
106957	chr18	24736592	24736852	261	*	samples_merged_q_0.05_peak_3180	4.48526	5.75382	2.49959	Promoter (<=1kb)	18	24715365	24736572	21208	2	ENSMUST00000154205.2	-20	Slc39a6
107045	chr18	42372271	42372544	274	*	samples_merged_q_0.05_peak_3234	4.12126	5.05733	2.02812	Intron (ENSMUST00000097590.5/107045, intron 10 of 31)	18	42376687	42377957	1271	2	ENSMUST00000236826.2	5413	Lars1
107227	chr19	7034195	7034499	305	*	samples_merged_q_0.05_peak_3362	5.16818	7.01795	3.48395	Promoter (<=1kb)	19	7034178	7175422	141245	1	ENSMUST00000040261.7	17	Macrod1
107448	chr13	55097095	55097488	394	*	samples_merged_q_0.05_peak_1784	3.49322	4.58815	1.69071	Promoter (<=1kb)	13	55097224	55153831	56608	1	ENSMUST00000026994.14	0	Unc5a
107476	chr11	84070327	84070764	438	*	samples_merged_q_0.05_peak_1245	3.55352	4.89506	1.93283	Promoter (<=1kb)	11	84070657	84105021	34365	1	ENSMUST00000137500.9	0	Acaca
107476	chr11	84184961	84185253	293	*	samples_merged_q_0.05_peak_1246	4.21629	5.21428	2.0456	Intron (ENSMUST00000103201.8/107476, intron 32 of 55)	11	84171281	84202227	30947	1	ENSMUST00000183887.2	13680	Acaca
107508	chr1	185131792	185132129	338	*	samples_merged_q_0.05_peak_640	6.02328	8.62283	4.74735	Exon (ENSMUST00000192049.2/ENSMUST00000192049.2, exon 1 of 1)	1	185099794	185106647	6854	1	ENSMUST00000192324.2	31998	Eprs1
107513	chr13	38177881	38178308	428	*	samples_merged_q_0.05_peak_1757	5.69551	8.31056	4.5373	Promoter (<=1kb)	13	38150581	38178133	27553	2	ENSMUST00000225246.2	0	Ssr1
107568	chr4	19708987	19709293	307	*	samples_merged_q_0.05_peak_4614	6.10534	8.97532	5.08254	Promoter (<=1kb)	4	19608303	19708993	100691	2	ENSMUST00000108246.9	0	Wwp1
107767	chr13	94421808	94422159	352	*	samples_merged_q_0.05_peak_1896	5.96973	8.53181	4.70547	Promoter (<=1kb)	13	94337818	94422337	84520	2	ENSMUST00000022197.15	178	Scamp1
107885	chr9	89235088	89235392	305	*	samples_merged_q_0.05_peak_6706	4.81862	6.30189	2.854	Intron (ENSMUST00000186009.2/105245032, intron 2 of 3)	9	89100507	89122223	21717	1	ENSMUST00000147644.2	134581	Mthfs
107895	chr1	126989558	126989849	292	*	samples_merged_q_0.05_peak_498	5.01204	6.76298	3.25496	Distal Intergenic	1	127132752	127315949	183198	1	ENSMUST00000189427.7	-142903	Mgat5
107971	chr17	47999861	48000172	312	*	samples_merged_q_0.05_peak_2991	4.21629	5.21428	2.0456	Promoter (<=1kb)	17	47999955	48010476	10522	1	ENSMUST00000156118.8	0	Frs3
108013	chr18	25812085	25812678	594	*	samples_merged_q_0.05_peak_3182	5.42095	7.43979	3.75036	Exon (ENSMUST00000115816.3/108013, exon 2 of 13)	18	25637277	25885749	248473	2	ENSMUST00000225927.2	73071	Celf4
108075	chr7	27014169	27014445	277	*	samples_merged_q_0.05_peak_5878	3.49383	3.98832	1.3804	Intron (ENSMUST00000038618.13/108075, intron 24 of 32)	7	27006985	27010103	3119	2	ENSMUST00000148594.8	-4066	Ltbp4
108116	chr7	74126618	74126877	260	*	samples_merged_q_0.05_peak_6017	4.12126	5.05733	2.02812	Intron (ENSMUST00000098371.9/108116, intron 2 of 10)	7	74009402	74154083	144682	2	ENSMUST00000136389.2	27206	Slco3a1
108167548	chr8	106318566	106318843	278	*	samples_merged_q_0.05_peak_6447	4.88097	6.55169	3.06387	Intron (ENSMUST00000194091.6/11604, intron 1 of 5)	8	106311953	106312832	880	2	ENSMUST00000212546.2	-5734	Gm45855
108167704	chr1	115508995	115509414	420	*	samples_merged_q_0.05_peak_454	3.61397	4.18345	1.42191	Distal Intergenic	1	115596718	115612349	15632	2	ENSMUST00000186137.7	102935	Gm50605
108167998	chr12	42271607	42271976	370	*	samples_merged_q_0.05_peak_1416	4.67485	6.06263	2.7635	Distal Intergenic	12	41965491	42063539	98049	2	ENSMUST00000222917.2	-208068	Gm46348
108169156	chr6	92298483	92298745	263	*	samples_merged_q_0.05_peak_5668	5.42095	7.43979	3.75036	Distal Intergenic	6	92248398	92248553	156	2	ENSMUST00000204384.2	-49930	Gm44803
108169192	chr6	69048210	69048553	344	*	samples_merged_q_0.05_peak_5598	4.15862	5.41808	2.20975	Distal Intergenic	6	68857162	68857658	497	2	ENSMUST00000198756.2	-190552	Gm53190
108937	chr7	99629164	99629557	394	*	samples_merged_q_0.05_peak_6086	4.15862	5.41808	2.20975	Promoter (<=1kb)	7	99569461	99629655	60195	2	ENSMUST00000080817.6	98	Rnf169
109323	chr5	43770554	43770961	408	*	samples_merged_q_0.05_peak_5119	4.64215	6.00885	2.71762	Intron (ENSMUST00000076939.10/109323, intron 2 of 2)	5	43759255	43773928	14674	1	ENSMUST00000121872.3	11299	C1qtnf7
109648	chr6	49836836	49837129	294	*	samples_merged_q_0.05_peak_5523	4.17881	5.15208	2.0456	Distal Intergenic	6	49799690	49806487	6798	1	ENSMUST00000031843.7	37146	Npy
109676	chr3	127249265	127249604	340	*	samples_merged_q_0.05_peak_4469	4.15862	5.41808	2.20975	Intron (ENSMUST00000182711.8/109676, intron 1 of 31)	3	127130043	127292651	162609	2	ENSMUST00000182316.3	43047	Ank2
109689	chr7	99184533	99184929	397	*	samples_merged_q_0.05_peak_6085	6.6256	9.8468	5.83002	Promoter (<=1kb)	7	99184673	99255978	71306	1	ENSMUST00000098266.9	0	Arrb1
109785	chr9	86453863	86454175	313	*	samples_merged_q_0.05_peak_6695	4.81862	6.30189	2.854	Promoter (<=1kb)	9	86436430	86453880	17451	2	ENSMUST00000070064.11	0	Pgm3
109905	chr3	105708276	105708666	391	*	samples_merged_q_0.05_peak_4394	6.33861	9.36147	5.45028	Promoter (<=1kb)	3	105634583	105708652	74070	2	ENSMUST00000090678.11	0	Rap1a
110074	chr2	125089469	125089827	359	*	samples_merged_q_0.05_peak_3894	4.59394	5.92998	2.64904	Promoter (<=1kb)	2	125089402	125100528	11127	1	ENSMUST00000051605.9	67	Dut
110075	chr5	98905550	98905876	327	*	samples_merged_q_0.05_peak_5295	5.29877	7.23435	3.62896	Intron (ENSMUST00000080333.8/75784, intron 4 of 5)	5	99002274	99021619	19346	1	ENSMUST00000197143.2	-96398	Bmp3
110082	chr15	28901274	28901805	532	*	samples_merged_q_0.05_peak_2381	3.33748	3.97873	1.37569	Distal Intergenic	15	28203898	28472198	268301	1	ENSMUST00000067048.8	697376	Dnah5
110521	chr13	42205196	42205594	399	*	samples_merged_q_0.05_peak_1766	5.23504	7.32645	3.70729	Promoter (<=1kb)	13	42205497	42338502	133006	1	ENSMUST00000060148.6	0	Hivep1
110532	chr10	77253769	77254334	566	*	samples_merged_q_0.05_peak_888	3.42225	4.2824	1.44679	Promoter (<=1kb)	10	77126560	77254099	127540	2	ENSMUST00000020496.14	0	Adarb1
110651	chrX	157607215	157607628	414	*	samples_merged_q_0.05_peak_7635	4.18274	5.91275	2.63496	Distal Intergenic	20	157993303	158147498	154196	1	ENSMUST00000112493.8	-385675	Rps6ka3
111173	chr6	119648523	119648797	275	*	samples_merged_q_0.05_peak_5732	4.21629	5.21428	2.0456	Intron (ENSMUST00000183703.8/111173, intron 17 of 20)	6	119551974	119720405	168432	2	ENSMUST00000184320.8	71608	Erc1
113856	chr6	89941023	89941357	335	*	samples_merged_q_0.05_peak_5662	4.44024	5.68147	2.43629	Distal Intergenic	6	89953153	89954082	930	1	ENSMUST00000075797.2	-11796	Vmn1r46
11441	chr7	62610991	62611627	637	*	samples_merged_q_0.05_peak_5993	4.62069	6.35706	2.88522	Distal Intergenic	7	62748440	62862261	113822	2	ENSMUST00000032738.7	250634	Chrna7
114604	chr16	97652383	97653166	784	*	samples_merged_q_0.05_peak_2859	22.8884	51.8495	46.6949	Promoter (<=1kb)	16	97592667	97652427	59761	2	ENSMUST00000095849.10	0	Prdm15
114715	chr2	116951468	116951753	286	*	samples_merged_q_0.05_peak_3868	5.18613	7.04752	3.50847	Promoter (<=1kb)	2	116951855	117012760	60906	1	ENSMUST00000028829.13	-102	Spred1
11479	chr15	101071787	101072069	283	*	samples_merged_q_0.05_peak_2598	4.59394	5.92998	2.64904	Promoter (<=1kb)	15	101071948	101111565	39618	1	ENSMUST00000000544.12	0	Acvr1b
114872	chr7	16983811	16984115	305	*	samples_merged_q_0.05_peak_5857	4.12126	5.05733	2.02812	Distal Intergenic	7	16937402	16949685	12284	1	ENSMUST00000075934.7	46409	Psg29
11488	chr11	102652248	102652526	279	*	samples_merged_q_0.05_peak_1278	4.81862	6.30189	2.854	Promoter (<=1kb)	11	102652265	102671088	18824	1	ENSMUST00000068150.7	0	Adam11
114889	chr2	150558227	150558523	297	*	samples_merged_q_0.05_peak_3959	4.70802	6.11741	2.78461	Distal Intergenic	2	150522622	150531280	8659	2	ENSMUST00000046095.10	-26947	Vsx1
114893	chr3	35986707	35987086	380	*	samples_merged_q_0.05_peak_4152	3.69655	4.5237	1.63575	Promoter (<=1kb)	3	35949459	35986985	37527	2	ENSMUST00000197489.5	0	Dcun1d1
115485691	chr9	85656036	85656386	351	*	samples_merged_q_0.05_peak_6693	4.26886	5.40899	2.20975	Promoter (1-2kb)	9	85654404	85654533	130	2	ENSMUST00000083772.3	-1503	Gm22830
115485729	chr10	128182390	128182801	412	*	samples_merged_q_0.05_peak_1026	5.42329	7.62894	3.92237	Promoter (2-3kb)	10	128185110	128185244	135	1	ENSMUST00000158688.4	-2309	Gm23182
115485739	chr10	34716345	34716692	348	*	samples_merged_q_0.05_peak_770	3.75467	4.7953	1.8549	Distal Intergenic	10	34988194	34988327	134	1	ENSMUST00000104561.3	-271502	Gm26341
115485748	chr10	66214195	66214732	538	*	samples_merged_q_0.05_peak_869	5.29877	7.23435	3.62896	Distal Intergenic	10	66319332	66319461	130	1	ENSMUST00000104251.3	-104600	Gm22594
115485754	chr10	101141057	101141573	517	*	samples_merged_q_0.05_peak_956	3.50614	4.0081	1.38591	Distal Intergenic	10	101380038	101380169	132	1	ENSMUST00000157098.3	-238465	Gm26278
115485793	chr1	13791846	13792109	264	*	samples_merged_q_0.05_peak_88	4.65281	6.1889	2.8211	Distal Intergenic	1	13844558	13844688	131	2	ENSMUST00000104180.3	52579	Gm26273
115485826	chr11	55604774	55605061	288	*	samples_merged_q_0.05_peak_1201	5.11507	6.93078	3.40535	Distal Intergenic	11	55662914	55961674	298761	1	ENSMUST00000134285.2	-57853	Gm12239
115485853	chr11	12853902	12854166	265	*	samples_merged_q_0.05_peak_1078	4.21629	5.21428	2.0456	Distal Intergenic	11	12642813	12642942	130	1	ENSMUST00000157884.3	211089	Gm22789
115485865	chr12	43804141	43804570	430	*	samples_merged_q_0.05_peak_1424	4.12126	5.05733	2.02812	Distal Intergenic	12	43789820	43789948	129	1	ENSMUST00000083070.3	14321	Gm26326
115485879	chr12	59652474	59652750	277	*	samples_merged_q_0.05_peak_1480	4.71002	6.12072	2.78461	Distal Intergenic	12	59712440	59712570	131	2	ENSMUST00000104398.3	59820	Gm24377
115485906	chr13	76102091	76102371	281	*	samples_merged_q_0.05_peak_1822	4.21629	5.21428	2.0456	Exon (ENSMUST00000073790.7/ENSMUST00000073790.7, exon 1 of 1)	13	76111776	76111906	131	2	ENSMUST00000104467.3	9535	Gm23319
115485931	chr14	57930817	57931096	280	*	samples_merged_q_0.05_peak_2085	4.14219	5.21023	2.0456	3' UTR	14	57935266	57935394	129	1	ENSMUST00000082591.3	-4170	Gm26440
115485939	chr14	90664179	90664500	322	*	samples_merged_q_0.05_peak_2171	4.12298	5.18026	2.0456	Distal Intergenic	14	90593823	90593953	131	1	ENSMUST00000104431.3	70356	Gm25495
115485945	chr14	107792602	107792865	264	*	samples_merged_q_0.05_peak_2223	3.69655	4.5237	1.63575	Distal Intergenic	14	107003464	107003590	127	1	ENSMUST00000104036.3	789138	Gm23437
115485951	chr14	90068737	90069041	305	*	samples_merged_q_0.05_peak_2167	4.11951	5.05447	2.02812	Distal Intergenic	14	89944241	89944372	132	1	ENSMUST00000104220.3	124496	Gm25415
115485957	chr14	82785875	82786374	500	*	samples_merged_q_0.05_peak_2136	4.15862	5.41808	2.20975	Distal Intergenic	14	83643071	83643204	134	1	ENSMUST00000157384.3	-856697	Gm24774
115486019	chr16	53139394	53139664	271	*	samples_merged_q_0.05_peak_2721	5.17774	7.23502	3.62896	Distal Intergenic	16	52767167	52767292	126	2	ENSMUST00000104530.3	-372102	Gm25723
115486046	chr17	82698288	82698598	311	*	samples_merged_q_0.05_peak_3081	4.71002	6.12072	2.78461	Distal Intergenic	17	82539573	82539701	129	2	ENSMUST00000158192.3	-158587	Gm22386
115486063	chr18	28426823	28427186	364	*	samples_merged_q_0.05_peak_3194	4.71002	6.12072	2.78461	Distal Intergenic	18	28442813	28442944	132	1	ENSMUST00000157315.3	-15627	Gm24246
115486063	chr18	28474356	28474809	454	*	samples_merged_q_0.05_peak_3195	3.23047	4.16698	1.42191	Distal Intergenic	18	28442813	28442944	132	1	ENSMUST00000157315.3	31543	Gm24246
115486063	chr18	28515781	28516065	285	*	samples_merged_q_0.05_peak_3196	3.51853	4.02806	1.38591	Distal Intergenic	18	28442813	28442944	132	1	ENSMUST00000157315.3	72968	Gm24246
115486092	chrX	156108971	156109801	831	*	samples_merged_q_0.05_peak_7629	5.54482	8.35324	4.56454	Intron (ENSMUST00000079945.11/18675, intron 11 of 21)	20	156082486	156082617	132	2	ENSMUST00000104421.3	-26354	Gm25795
115486101	chrX	130924904	130925168	265	*	samples_merged_q_0.05_peak_7502	5.42095	7.43979	3.75036	Distal Intergenic	20	131454463	131454593	131	2	ENSMUST00000104440.3	529425	Gm23768
115486105	chrX	120739091	120739409	319	*	samples_merged_q_0.05_peak_7458	3.62442	4.27018	1.44233	Distal Intergenic	20	120621786	120621921	136	1	ENSMUST00000157914.3	117305	Gm23277
115486132	chr2	171002636	171002918	283	*	samples_merged_q_0.05_peak_3990	3.62442	4.27018	1.44233	Distal Intergenic	2	171148088	171148351	264	2	ENSMUST00000157880.3	145433	Gm26489
115486132	chr2	171268092	171268357	266	*	samples_merged_q_0.05_peak_3991	5.88752	8.39308	4.58091	Distal Intergenic	2	171148088	171148351	264	2	ENSMUST00000157880.3	-119741	Gm26489
115486188	chr3	77992361	77992670	310	*	samples_merged_q_0.05_peak_4315	6.47627	9.59271	5.62524	Distal Intergenic	3	78887229	78887358	130	1	ENSMUST00000240248.1	-894559	Gm23440
115486199	chr3	114351605	114352154	550	*	samples_merged_q_0.05_peak_4438	3.75467	4.7953	1.8549	Distal Intergenic	3	114617803	114617934	132	2	ENSMUST00000104222.3	265780	Gm23750
115486232	chr3	22599860	22600219	360	*	samples_merged_q_0.05_peak_4111	4.47166	5.90444	2.63075	Distal Intergenic	3	22464087	22464215	129	2	ENSMUST00000158221.3	-135645	Gm26354
115486236	chr3	77353147	77353437	291	*	samples_merged_q_0.05_peak_4313	5.42095	7.43979	3.75036	Distal Intergenic	3	77012516	77012592	77	2	ENSMUST00000157856.4	-340555	Gm23644
115486278	chr4	64450922	64451265	344	*	samples_merged_q_0.05_peak_4751	3.61397	4.18345	1.42191	Distal Intergenic	4	64362967	64363095	129	1	ENSMUST00000104026.3	87955	Gm23950
115486278	chr4	64697574	64697836	263	*	samples_merged_q_0.05_peak_4752	4.65997	6.20019	2.8211	Distal Intergenic	4	64362967	64363095	129	1	ENSMUST00000104026.3	334607	Gm23950
115486288	chr4	89133967	89134229	263	*	samples_merged_q_0.05_peak_4847	4.56236	5.87856	2.6088	Distal Intergenic	4	89101218	89101357	140	2	ENSMUST00000157879.4	-32610	Gm26490
115486311	chr5	83909800	83910059	260	*	samples_merged_q_0.05_peak_5248	3.97839	4.82574	1.8769	Distal Intergenic	5	83871309	83871436	128	2	ENSMUST00000104286.3	-38364	Gm24792
115486320	chr5	58543026	58543288	263	*	samples_merged_q_0.05_peak_5168	4.5589	6.26047	2.854	Distal Intergenic	5	58571571	58571704	134	1	ENSMUST00000158171.3	-28283	Gm22536
115486333	chr6	59632271	59632616	346	*	samples_merged_q_0.05_peak_5552	5.54482	8.35324	4.56454	Distal Intergenic	6	59682731	59682859	129	2	ENSMUST00000082870.4	50243	Gm22622
115486333	chr6	59648863	59649168	306	*	samples_merged_q_0.05_peak_5553	4.12126	5.05733	2.02812	Distal Intergenic	6	59682731	59682859	129	2	ENSMUST00000082870.4	33691	Gm22622
115486344	chr6	68252430	68252752	323	*	samples_merged_q_0.05_peak_5594	5.42095	7.43979	3.75036	Distal Intergenic	6	68509728	68509860	133	1	ENSMUST00000104137.3	-256976	Gm25833
115486354	chr6	59110809	59111177	369	*	samples_merged_q_0.05_peak_5545	3.90464	4.84225	1.89309	Distal Intergenic	6	59076238	59076369	132	1	ENSMUST00000178930.3	34571	Gm22367
115486425	chr4	107576583	107576854	272	*	samples_merged_q_0.05_peak_4902	3.56899	4.10985	1.42191	Intron (ENSMUST00000143064.8/102633724, intron 3 of 3)	4	107564254	107565841	1588	1	ENSMUST00000147654.2	12329	Gm57502
115486853	chr7	137602698	137603031	334	*	samples_merged_q_0.05_peak_6155	4.71002	6.12072	2.78461	Distal Intergenic	7	137703162	137703268	107	2	ENSMUST00000239719.1	100237	Gm25798
115486861	chr7	95006808	95007084	277	*	samples_merged_q_0.05_peak_6076	3.61397	4.18345	1.42191	Distal Intergenic	7	95091558	95091664	107	2	ENSMUST00000240171.1	84580	Gm25684
115487008	chr8	112969101	112969359	259	*	samples_merged_q_0.05_peak_6456	4.15862	5.41808	2.20975	Distal Intergenic	8	112789137	112789243	107	1	ENSMUST00000083766.3	179964	Gm22827
115487031	chr8	97549887	97550268	382	*	samples_merged_q_0.05_peak_6419	3.71138	4.40463	1.55847	Distal Intergenic	8	97949166	97949267	102	1	ENSMUST00000158914.3	-398898	Gm25160
115487051	chr8	5885519	5885792	274	*	samples_merged_q_0.05_peak_6182	4.71002	6.12072	2.78461	Distal Intergenic	8	6273819	6273962	144	2	ENSMUST00000157630.3	388170	Gm24288
115487057	chr8	99220001	99220504	504	*	samples_merged_q_0.05_peak_6427	3.75467	4.7953	1.8549	Distal Intergenic	8	99401709	99401834	126	2	ENSMUST00000116830.3	181330	Gm23494
115487234	chr9	108618551	108619045	495	*	samples_merged_q_0.05_peak_6752	5.13265	6.95958	3.43059	Promoter (2-3kb)	9	108615951	108616057	107	2	ENSMUST00000083740.3	-2494	Gm24259
115487257	chr9	9334547	9334858	312	*	samples_merged_q_0.05_peak_6518	3.62442	4.27018	1.44233	Distal Intergenic	9	9301396	9301457	62	1	ENSMUST00000157451.3	33151	Gm22815
115487332	chr9	47375183	47375663	481	*	samples_merged_q_0.05_peak_6631	4.21629	5.21428	2.0456	Distal Intergenic	9	47436914	47437020	107	2	ENSMUST00000240419.1	61357	Gm22286
115487509	chr10	54796277	54796645	369	*	samples_merged_q_0.05_peak_847	4.62069	6.35706	2.88522	Distal Intergenic	10	54589072	54589133	62	2	ENSMUST00000158362.3	-207144	Gm25602
115487548	chr10	48651709	48651974	266	*	samples_merged_q_0.05_peak_813	3.53251	4.05064	1.38591	Distal Intergenic	10	48495408	48495491	84	2	ENSMUST00000083696.4	-156218	Gm24256
115487587	chr1	70587690	70588182	493	*	samples_merged_q_0.05_peak_305	8.83128	14.738	10.3679	Intron (ENSMUST00000065425.12/66722, intron 16 of 16)	1	70635974	70636080	107	1	ENSMUST00000102000.3	-47792	Gm23422
115487587	chr1	70642018	70642350	333	*	samples_merged_q_0.05_peak_306	6.02328	8.62283	4.74735	Intron (ENSMUST00000065425.12/66722, intron 16 of 16)	1	70635974	70636080	107	1	ENSMUST00000102000.3	6044	Gm23422
115487594	chr1	3180646	3180925	280	*	samples_merged_q_0.05_peak_43	3.93941	4.89578	1.93324	Distal Intergenic	1	3172239	3172348	110	1	ENSMUST00000082908.3	8407	Gm26206
115487610	chr1	35719081	35719372	292	*	samples_merged_q_0.05_peak_193	4.21629	5.21428	2.0456	Distal Intergenic	1	35800683	35800787	105	1	ENSMUST00000082667.3	-81311	Gm25634
115487635	chr1	32852237	32852816	580	*	samples_merged_q_0.05_peak_185	4.5122	5.96787	2.68246	Distal Intergenic	1	32607440	32607502	63	2	ENSMUST00000158864.3	-244735	Gm24732
115487639	chr1	94311583	94311845	263	*	samples_merged_q_0.05_peak_347	4.14219	5.21023	2.0456	Distal Intergenic	1	94543361	94543429	69	2	ENSMUST00000104225.3	231584	Gm23389
115487657	chr1	77884638	77884995	358	*	samples_merged_q_0.05_peak_317	4.14219	5.21023	2.0456	Distal Intergenic	1	77874920	77875083	164	2	ENSMUST00000083281.3	-9555	Gm26263
115487666	chr1	116742329	116742587	259	*	samples_merged_q_0.05_peak_458	3.69655	4.5237	1.63575	Intron (ENSMUST00000179777.3/ENSMUST00000179777.3, intron 3 of 3)	1	117464031	117464194	164	1	ENSMUST00000083931.3	-721444	Gm24030
115487666	chr1	117436246	117436679	434	*	samples_merged_q_0.05_peak_461	4.8104	6.28808	2.854	Distal Intergenic	1	117464031	117464194	164	1	ENSMUST00000083931.3	-27352	Gm24030
115487705	chr1	96423658	96424913	1256	*	samples_merged_q_0.05_peak_363	4.94564	6.65564	3.15578	Distal Intergenic	1	96544824	96544930	107	1	ENSMUST00001239562.1	-119911	Gm26245
115487866	chr11	74621009	74621299	291	*	samples_merged_q_0.05_peak_1233	3.55624	4.08911	1.41693	Promoter (1-2kb)	11	74619229	74619335	107	1	ENSMUST00000158264.3	1780	Gm24211
115487934	chr11	38596142	38596433	292	*	samples_merged_q_0.05_peak_1170	3.51853	4.02806	1.38591	Distal Intergenic	11	38688998	38689104	107	2	ENSMUST00000240209.1	92671	Gm23520
115488046	chr12	46151848	46152166	319	*	samples_merged_q_0.05_peak_1436	4.14219	5.21023	2.0456	Distal Intergenic	12	46031126	46031332	207	1	ENSMUST00000082866.3	120722	Gm24948
115488113	chr12	86671791	86672063	273	*	samples_merged_q_0.05_peak_1553	3.69655	4.5237	1.63575	Distal Intergenic	12	86701899	86702005	107	1	ENSMUST00000101884.3	-29836	Gm22004
115488114	chr12	55990871	55991274	404	*	samples_merged_q_0.05_peak_1471	5.69551	8.31056	4.5373	Distal Intergenic	12	55957606	55957708	103	2	ENSMUST00000083310.4	-33163	Gm22296
115488443	chr14	96710484	96710743	260	*	samples_merged_q_0.05_peak_2193	4.14219	5.21023	2.0456	Intron (ENSMUST00000022666.9/93688, intron 1 of 10)	14	96682391	96682506	116	1	ENSMUST00000083108.3	28093	Gm24043
115488462	chr14	110424900	110425166	267	*	samples_merged_q_0.05_peak_2235	4.15862	5.41808	2.20975	Distal Intergenic	14	110665589	110665695	107	2	ENSMUST00000239747.2	240529	Gm23242
115488571	chr15	65343208	65343515	308	*	samples_merged_q_0.05_peak_2516	4.5312	5.82802	2.565	Distal Intergenic	15	65566398	65566586	189	1	ENSMUST00000104595.4	-222883	Gm23907
115488585	chr15	17882985	17883489	505	*	samples_merged_q_0.05_peak_2338	3.33748	3.97873	1.37569	Distal Intergenic	15	18009349	18009455	107	2	ENSMUST00000240000.1	125966	Gm24713
115488685	chr16	53620450	53620741	292	*	samples_merged_q_0.05_peak_2724	4.88097	6.55169	3.06387	Distal Intergenic	16	54174825	54174956	132	1	ENSMUST00000082793.3	-554084	Gm25853
115488741	chr16	62111690	62112014	325	*	samples_merged_q_0.05_peak_2752	3.97481	4.95038	1.97957	Distal Intergenic	16	62391399	62391502	104	1	ENSMUST00000093663.3	-279385	Gm24164
115488751	chr16	47284436	47284777	342	*	samples_merged_q_0.05_peak_2697	5.20421	7.07735	3.5355	Distal Intergenic	16	47326682	47326788	107	2	ENSMUST00000157107.4	42011	Gm24651
115488751	chr16	47622341	47622611	271	*	samples_merged_q_0.05_peak_2698	4.21629	5.21428	2.0456	Distal Intergenic	16	47326682	47326788	107	2	ENSMUST00000157107.4	-295553	Gm24651
115488878	chr17	94617353	94617629	277	*	samples_merged_q_0.05_peak_3117	3.99206	4.8477	1.89451	Distal Intergenic	17	94636183	94636291	109	2	ENSMUST00000104245.3	18662	Gm22593
115488879	chr17	76373527	76373811	285	*	samples_merged_q_0.05_peak_3069	3.61397	4.18345	1.42191	Distal Intergenic	17	76381541	76381646	106	1	ENSMUST00000104111.3	-7730	Gm24126
115488881	chr17	59723432	59723717	286	*	samples_merged_q_0.05_peak_3022	4.69137	6.08989	2.78461	Distal Intergenic	17	59876554	59876660	107	2	ENSMUST00000104374.3	152943	Gm23203
115488881	chr17	60086800	60087131	332	*	samples_merged_q_0.05_peak_3025	4.47166	5.90444	2.63075	Distal Intergenic	17	59876554	59876660	107	2	ENSMUST00000104374.3	-210140	Gm23203
115488905	chr18	41649274	41649692	419	*	samples_merged_q_0.05_peak_3233	6.6256	9.8468	5.83002	Distal Intergenic	18	41880299	42007899	127601	2	ENSMUST00000235677.2	358207	Gm50410
115488966	chr18	32952708	32952975	268	*	samples_merged_q_0.05_peak_3213	5.69551	8.31056	4.5373	Promoter (<=1kb)	18	32953746	32953852	107	1	ENSMUST00000240108.1	-771	Gm26378
115488973	chr18	13254544	13254847	304	*	samples_merged_q_0.05_peak_3149	4.71002	6.12072	2.78461	Distal Intergenic	18	13342759	13342865	107	2	ENSMUST00000083216.3	88018	Gm22251
115489156	chrX	6037194	6037526	333	*	samples_merged_q_0.05_peak_6780	4.79303	6.25895	2.854	Distal Intergenic	20	6018945	6019063	119	1	ENSMUST00000240411.1	18249	n-R5s2
115489157	chrX	56803021	56803328	308	*	samples_merged_q_0.05_peak_7028	3.42225	4.2824	1.44679	Distal Intergenic	20	57034833	57034939	107	1	ENSMUST00000239654.1	-231505	Gm25023
115489165	chrX	127272876	127273140	265	*	samples_merged_q_0.05_peak_7477	3.42225	4.2824	1.44679	Distal Intergenic	20	127601295	127601402	108	1	ENSMUST00000083964.3	-328155	Gm24522
115489168	chrX	63772859	63773137	279	*	samples_merged_q_0.05_peak_7083	4.14219	5.21023	2.0456	Distal Intergenic	20	63844117	63844222	106	1	ENSMUST00000083969.3	-70980	Gm26111
115489169	chrX	44823174	44823454	281	*	samples_merged_q_0.05_peak_6963	4.69137	6.08989	2.78461	Distal Intergenic	20	44884238	44884344	107	2	ENSMUST00000082530.3	60890	Gm25078
115489169	chrX	45110139	45110633	495	*	samples_merged_q_0.05_peak_6964	6.70523	10.227	6.19682	Distal Intergenic	20	44884238	44884344	107	2	ENSMUST00000082530.3	-225795	Gm25078
115489180	chrX	74061188	74061592	405	*	samples_merged_q_0.05_peak_7164	3.42225	4.2824	1.44679	Intron (ENSMUST00000114109.8/100503280, intron 1 of 7)	20	74041183	74041289	107	2	ENSMUST00001239532.1	-19899	Gm25629
115489182	chrX	126866028	126866492	465	*	samples_merged_q_0.05_peak_7473	5.88752	8.39308	4.58091	Distal Intergenic	20	126809255	126809361	107	2	ENSMUST00000240076.1	-56667	Gm25061
115489182	chrX	126912248	126912566	319	*	samples_merged_q_0.05_peak_7475	5.42095	7.43979	3.75036	Distal Intergenic	20	126809255	126809361	107	2	ENSMUST00000240076.1	-102887	Gm25061
115489191	chrX	137328429	137328756	328	*	samples_merged_q_0.05_peak_7540	4.21629	5.21428	2.0456	Intron (ENSMUST00000113063.8/60367, intron 5 of 10)	20	137323464	137323568	105	2	ENSMUST00000157207.4	-4861	Gm23958
115489245	chrX	112308294	112308820	527	*	samples_merged_q_0.05_peak_7407	3.23047	4.16698	1.42191	Intron (ENSMUST00000113380.8/93837, intron 2 of 15)	20	112241797	112241922	126	2	ENSMUST00000116778.3	-66372	Gm24831
115489257	chrX	14350905	14351473	569	*	samples_merged_q_0.05_peak_6811	4.14219	5.21023	2.0456	Distal Intergenic	20	14181640	14181830	191	2	ENSMUST00000082838.3	-169075	Gm25202
115489274	chrX	137199572	137199916	345	*	samples_merged_q_0.05_peak_7539	4.81862	6.30189	2.854	Intron (ENSMUST00000113063.8/60367, intron 5 of 10)	20	137204056	137204162	107	2	ENSMUST00000239631.1	4246	Gm22057
115489565	chr2	20204642	20204904	263	*	samples_merged_q_0.05_peak_3547	3.33748	3.97873	1.37569	Intron (ENSMUST00000114610.8/208618, intron 2 of 7)	2	20285330	20285436	107	1	ENSMUST00000083319.3	-80426	Gm23970
115489612	chr2	33087428	33087728	301	*	samples_merged_q_0.05_peak_3583	4.07614	4.98365	2.00495	Intron (ENSMUST00000131298.7/241308, intron 8 of 17)	2	33101817	33101953	137	2	ENSMUST00000158211.3	14225	Gm23546
115489639	chr2	47360883	47361187	305	*	samples_merged_q_0.05_peak_3627	6.21329	9.42339	5.48158	Distal Intergenic	2	48274231	48274350	120	2	ENSMUST00000116849.3	913163	Gm25338
115489822	chr3	86003411	86003756	346	*	samples_merged_q_0.05_peak_4342	4.56299	6.78483	3.27288	Intron (ENSMUST00000238443.2/27059, intron 8 of 20)	3	86007841	86007962	122	1	ENSMUST00000083913.3	-4085	Gm25188
115489827	chr3	17001609	17001952	344	*	samples_merged_q_0.05_peak_4084	4.65997	6.20019	2.8211	Distal Intergenic	3	17305465	17305608	144	2	ENSMUST00000157916.3	303656	Gm24963
115489832	chr3	48831372	48831766	395	*	samples_merged_q_0.05_peak_4205	5.08276	7.33658	3.70729	Distal Intergenic	3	48909171	48909334	164	1	ENSMUST00000239931.1	-77405	Gm23511
115490013	chr4	30172422	30172736	315	*	samples_merged_q_0.05_peak_4671	4.51579	5.80308	2.54315	Distal Intergenic	4	31174909	31175012	104	2	ENSMUST00000083119.2	1002276	Gm25705
115490024	chr4	92785786	92786121	336	*	samples_merged_q_0.05_peak_4863	5.39216	7.3911	3.75036	Distal Intergenic	4	92754712	92754819	108	2	ENSMUST00000158289.3	-30967	Gm22605
115490060	chr4	67598980	67599247	268	*	samples_merged_q_0.05_peak_4762	4.71002	6.12072	2.78461	Distal Intergenic	4	68100769	68100939	171	1	ENSMUST00000082828.3	-501522	Gm23738
115490065	chr4	25583404	25583753	350	*	samples_merged_q_0.05_peak_4656	3.50614	4.0081	1.38591	Distal Intergenic	4	25566660	25566822	163	2	ENSMUST00000083106.2	-16582	Gm24977
115490092	chr4	116774953	116775419	467	*	samples_merged_q_0.05_peak_4928	4.65997	6.20019	2.8211	Intron (ENSMUST00000044823.4/74464, intron 1 of 13)	4	116779581	116779687	107	2	ENSMUST00000240534.1	4268	Gm22092
115490093	chr4	28022459	28022736	278	*	samples_merged_q_0.05_peak_4664	4.81862	6.30189	2.854	Distal Intergenic	4	27700671	27700777	107	1	ENSMUST00000179794.2	321788	Gm25173
115490097	chr4	15386392	15386656	265	*	samples_merged_q_0.05_peak_4592	4.10495	5.03064	2.02812	Distal Intergenic	4	15383148	15383254	107	1	ENSMUST00000178536.2	3244	Gm24317
115490237	chr5	70823011	70823331	321	*	samples_merged_q_0.05_peak_5214	5.29877	7.23435	3.62896	Distal Intergenic	5	70708184	70708290	107	2	ENSMUST00000240250.2	-114721	Gm26072
115490280	chr5	85335144	85335464	321	*	samples_merged_q_0.05_peak_5255	6.21329	9.42339	5.48158	Distal Intergenic	5	85977486	85977646	161	1	ENSMUST00000082621.3	-642022	Gm24626
115490286	chr5	55609132	55609395	264	*	samples_merged_q_0.05_peak_5159	4.14895	5.10281	2.0456	Distal Intergenic	5	55460762	55460923	162	2	ENSMUST00000083861.3	-148209	Gm25513
115490300	chr5	6386400	6386750	351	*	samples_merged_q_0.05_peak_5023	6.013	8.60533	4.74735	Distal Intergenic	5	6064863	6065024	162	2	ENSMUST00000158067.3	-321376	Gm23838
115490323	chr5	87059815	87060144	330	*	samples_merged_q_0.05_peak_5268	4.71002	6.12072	2.78461	Distal Intergenic	5	87064075	87064181	107	2	ENSMUST00000240158.1	4037	Gm25211
115490330	chr5	59123606	59123874	269	*	samples_merged_q_0.05_peak_5174	3.62442	4.27018	1.44233	Distal Intergenic	5	59372289	59372395	107	2	ENSMUST00000239835.1	248521	Gm22308
115490330	chr5	59526500	59526851	352	*	samples_merged_q_0.05_peak_5175	3.53251	4.05064	1.38591	Distal Intergenic	5	59372289	59372395	107	2	ENSMUST00000239835.1	-154105	Gm22308
115490453	chr6	21143840	21144405	566	*	samples_merged_q_0.05_peak_5438	4.21629	5.21428	2.0456	Distal Intergenic	6	21128155	21128257	103	1	ENSMUST00000157833.3	15685	Gm26373
115490497	chr6	76048846	76049151	306	*	samples_merged_q_0.05_peak_5634	4.14219	5.21023	2.0456	Distal Intergenic	6	76177101	76177261	161	2	ENSMUST00000082556.3	128110	Gm22283
115490510	chr6	10619445	10619835	391	*	samples_merged_q_0.05_peak_5397	4.72478	6.14518	2.80611	Distal Intergenic	6	10840587	10840693	107	2	ENSMUST00000240049.1	220858	Gm26058
115490511	chr6	75174895	75175219	325	*	samples_merged_q_0.05_peak_5627	3.33748	3.97873	1.37569	Distal Intergenic	6	74428780	74428887	108	2	ENSMUST00000082474.3	-746008	Gm23924
115490526	chr6	96665824	96666168	345	*	samples_merged_q_0.05_peak_5679	3.62442	4.27018	1.44233	Distal Intergenic	6	96537722	96537825	104	2	ENSMUST00000104410.4	-127999	Gm26011
11603	chr4	156281733	156282203	471	*	samples_merged_q_0.05_peak_5006	5.54482	8.35324	4.56454	Promoter (<=1kb)	4	156250235	156281945	31711	2	ENSMUST00000180572.2	0	Agrn
11607	chr13	30617988	30618251	264	*	samples_merged_q_0.05_peak_1740	3.49322	4.58815	1.69071	Distal Intergenic	13	30529524	30565089	35566	1	ENSMUST00000221743.2	88464	Agtr1a
11658	chr16	52436726	52437004	279	*	samples_merged_q_0.05_peak_2717	4.22806	5.34475	2.16791	Distal Intergenic	16	52069359	52274437	205079	2	ENSMUST00000023312.14	-162289	Alcam
116837	chr1	22599733	22600014	282	*	samples_merged_q_0.05_peak_130	4.5122	5.96787	2.68246	Intron (ENSMUST00000081544.14/116837, intron 5 of 27)	1	22522235	22551610	29376	2	ENSMUST00000239255.2	-48123	Rims1
116837	chr1	22676043	22676321	279	*	samples_merged_q_0.05_peak_131	3.33748	3.97873	1.37569	Intron (ENSMUST00000081544.14/116837, intron 2 of 27)	1	22522235	22551610	29376	2	ENSMUST00000239255.2	-124433	Rims1
116837	chr1	22986183	22986476	294	*	samples_merged_q_0.05_peak_133	3.55352	4.89506	1.93283	Distal Intergenic	1	22356475	22845203	488729	2	ENSMUST00000115273.10	-140980	Rims1
11732	chr15	27466604	27467222	619	*	samples_merged_q_0.05_peak_2379	4.81862	6.30189	2.854	Promoter (<=1kb)	15	27466763	27594995	128233	1	ENSMUST00000022875.7	0	Ank
11764	chr11	4943040	4943326	287	*	samples_merged_q_0.05_peak_1044	4.21629	5.21428	2.0456	Intron (ENSMUST00000109897.8/11764, intron 1 of 20)	11	4936934	4966851	29918	1	ENSMUST00000133014.8	6106	Ap1b1
118445	chr10	80412378	80412971	594	*	samples_merged_q_0.05_peak_908	4.59394	5.92998	2.64904	Promoter (<=1kb)	10	80402958	80413155	10198	2	ENSMUST00000038558.9	184	Klf16
118567359	chr10	17215289	17215573	285	*	samples_merged_q_0.05_peak_701	5.00622	7.4957	3.79617	Distal Intergenic	10	17387862	17396356	8495	2	ENSMUST00000219355.2	180783	Gm53271
118567713	chr9	62554514	62554802	289	*	samples_merged_q_0.05_peak_6654	3.42225	4.2824	1.44679	Distal Intergenic	9	62568156	62573363	5208	2	ENSMUST00000241674.1	18561	Gm53533
118567729	chr9	31940134	31940400	267	*	samples_merged_q_0.05_peak_6591	4.62597	5.98233	2.69437	Distal Intergenic	9	31858314	31916756	58443	2	ENSMUST00000216368.2	-23378	Gm47465
118567807	chr10	66645771	66646037	267	*	samples_merged_q_0.05_peak_870	5.42095	7.43979	3.75036	Intron (ENSMUST00000220426.2/ENSMUST00000220426.2, intron 1 of 2)	10	66725450	66727391	1942	2	ENSMUST00000217953.2	81354	Gm47903
118567864	chr1	167112280	167112696	417	*	samples_merged_q_0.05_peak_611	4.35287	5.54199	2.32214	Promoter (<=1kb)	1	167112637	167113335	699	1	ENSMUST00000195508.2	0	LOC118567864
118567886	chr11	121871862	121872123	262	*	samples_merged_q_0.05_peak_1315	3.61397	4.18345	1.42191	Distal Intergenic	11	121826852	121847599	20748	2	ENSMUST00000243379.1	-24263	Gm53660
118568147	chr14	48271447	48271767	321	*	samples_merged_q_0.05_peak_2051	3.30493	4.48292	1.62865	Distal Intergenic	14	48284468	48295927	11460	1	ENSMUST00000228584.2	-12701	Gm49306
118568179	chr15	41652024	41652420	397	*	samples_merged_q_0.05_peak_2425	7.62348	12.0497	7.86309	Promoter (<=1kb)	15	41621456	41652307	30852	2	ENSMUST00000180418.2	0	Gm26854
118568222	chr15	100950458	100950732	275	*	samples_merged_q_0.05_peak_2597	4.59394	5.92998	2.64904	Exon (ENSMUST00000178140.2/ENSMUST00000178140.2, exon 1 of 1)	15	100944223	100945278	1056	2	ENSMUST00000222611.2	-5180	Tmdd1
11861	chr12	40057525	40057842	318	*	samples_merged_q_0.05_peak_1408	6.02328	8.62283	4.74735	3' UTR	12	40055446	40087366	31921	2	ENSMUST00000144910.2	29524	Arl4a
11982	chr7	58069324	58069629	306	*	samples_merged_q_0.05_peak_5963	4.62069	6.35706	2.88522	Distal Intergenic	7	58305914	58308626	2713	1	ENSMUST00000207668.2	-236285	Atp10a
11990	chr2	130809263	130809526	264	*	samples_merged_q_0.05_peak_3908	4.62069	6.35706	2.88522	Intron (ENSMUST00000028781.9/11990, intron 11 of 28)	2	130824705	130836495	11791	1	ENSMUST00000132557.2	-15179	Atrn
11994	chr10	73934576	73934867	292	*	samples_merged_q_0.05_peak_880	4.12126	5.05733	2.02812	Intron (ENSMUST00000123398.9/11994, intron 6 of 13)	10	73782888	74482000	699113	1	ENSMUST00000195531.6	151688	Pcdh15
12038	chr3	73591990	73592298	309	*	samples_merged_q_0.05_peak_4288	4.48526	5.75382	2.49959	Intron (ENSMUST00000029367.6/12038, intron 2 of 3)	3	73555749	73615575	59827	2	ENSMUST00000133690.2	23277	Bche
12125	chr2	127969250	127969508	259	*	samples_merged_q_0.05_peak_3903	5.17774	7.23502	3.62896	Promoter (<=1kb)	2	127969495	127972065	2571	1	ENSMUST00000129206.2	0	Bcl2l11
12227	chr1	134020705	134020970	266	*	samples_merged_q_0.05_peak_512	5.16818	7.01795	3.48395	Distal Intergenic	1	134002908	134006858	3951	2	ENSMUST00000020692.7	-13847	Btg2
12238	chr2	18574029	18574422	394	*	samples_merged_q_0.05_peak_3540	4.5312	5.82802	2.565	Distal Intergenic	2	18677234	18681042	3809	1	ENSMUST00000061158.5	-102812	Commd3
12274	chr15	4725538	4726076	539	*	samples_merged_q_0.05_peak_2296	4.51579	5.80308	2.54315	Distal Intergenic	15	4756657	4833527	76871	1	ENSMUST00000162585.8	-30581	C6
12294	chr14	29137727	29138175	449	*	samples_merged_q_0.05_peak_2017	3.99206	4.8477	1.89451	Intron (ENSMUST00000022567.9/12294, intron 4 of 37)	14	28786153	29082791	296639	2	ENSMUST00000225863.2	-54936	Cacna2d3
12325	chr14	20843774	20844141	368	*	samples_merged_q_0.05_peak_2011	3.53251	4.05064	1.38591	Promoter (<=1kb)	14	20784943	20844119	59177	2	ENSMUST00000100837.11	0	Camk2g
123477722	chr6	109749950	109750227	278	*	samples_merged_q_0.05_peak_5714	5.42095	7.43979	3.75036	Distal Intergenic	6	108895783	108915694	19912	2	ENSMUST00000245504.1	-834256	Cirbil
12476	chr7	141047213	141047533	321	*	samples_merged_q_0.05_peak_6160	5.08026	6.8739	3.35393	Promoter (<=1kb)	7	141047305	141048564	1260	1	ENSMUST00000211522.2	0	Cd151
12512	chr10	128745665	128746005	341	*	samples_merged_q_0.05_peak_1029	5.33436	7.29389	3.6832	Promoter (<=1kb)	10	128745568	128748684	3117	1	ENSMUST00000026407.9	97	Cd63
12552	chr8	102470179	102470437	259	*	samples_merged_q_0.05_peak_6435	3.61397	4.18345	1.42191	Distal Intergenic	8	103361236	103363951	2716	2	ENSMUST00000210578.2	893514	Cdh11
12552	chr8	103323985	103324248	264	*	samples_merged_q_0.05_peak_6439	3.62442	4.27018	1.44233	Distal Intergenic	8	103361236	103363951	2716	2	ENSMUST00000210578.2	39703	Cdh11
12552	chr8	103511466	103511771	306	*	samples_merged_q_0.05_peak_6441	5.29877	7.23435	3.62896	Promoter (<=1kb)	8	103358727	103512274	153548	2	ENSMUST00000075190.5	503	Cdh11
12561	chr2	179084188	179084516	329	*	samples_merged_q_0.05_peak_3999	5.42095	7.43979	3.75036	Promoter (<=1kb)	2	179084224	179541166	456943	1	ENSMUST00000000314.13	0	Cdh4
12593	chr13	35924670	35926095	1426	*	samples_merged_q_0.05_peak_1753	9.24137	17.5466	13.0224	Promoter (<=1kb)	13	35925296	36058041	132746	1	ENSMUST00000163595.3	0	Cdyl
12606	chr7	34819258	34819553	296	*	samples_merged_q_0.05_peak_5894	3.61397	4.18345	1.42191	Promoter (<=1kb)	7	34818728	34821353	2626	1	ENSMUST00000042985.11	530	Cebpa
12632	chr12	54914498	54914766	269	*	samples_merged_q_0.05_peak_1467	3.99206	4.8477	1.89451	Distal Intergenic	12	54905602	54909662	4061	2	ENSMUST00000078124.8	-4836	Cfl2
12648	chr17	15925316	15925604	289	*	samples_merged_q_0.05_peak_2877	3.84254	5.36638	2.18595	Promoter (<=1kb)	17	15925280	15952170	26891	1	ENSMUST00000173159.2	36	Chd1
12661	chr6	103671015	103671323	309	*	samples_merged_q_0.05_peak_5694	4.81862	6.30189	2.854	Intron (ENSMUST00000203912.3/12661, intron 13 of 26)	6	103674711	103706787	32077	1	ENSMUST00000205098.2	-3388	Chl1
12753	chr5	76451920	76452218	299	*	samples_merged_q_0.05_peak_5222	4.21629	5.21428	2.0456	Promoter (<=1kb)	5	76360024	76452395	92372	2	ENSMUST00000075159.5	177	Clock
12789	chrX	71141312	71141623	312	*	samples_merged_q_0.05_peak_7152	4.8104	6.28808	2.854	Distal Intergenic	20	71035461	71045089	9629	1	ENSMUST00000145642.2	105851	Cnga2
12823	chr1	24492475	24492757	283	*	samples_merged_q_0.05_peak_144	4.14219	5.21023	2.0456	Promoter (<=1kb)	1	24300971	24491826	190856	2	ENSMUST00000144297.2	-649	Col19a1
12842	chr11	94779420	94779698	279	*	samples_merged_q_0.05_peak_1259	3.61397	4.18345	1.42191	Distal Intergenic	11	94827050	94843868	16819	1	ENSMUST00000001547.8	-47352	Col1a1
12867	chr13	86243113	86243434	322	*	samples_merged_q_0.05_peak_1863	4.62597	5.98233	2.69437	Distal Intergenic	13	86192935	86195023	2089	2	ENSMUST00000131011.2	-48090	Cox7c
12867	chr13	87132522	87132849	328	*	samples_merged_q_0.05_peak_1873	3.62442	4.27018	1.44233	Distal Intergenic	13	86192935	86195023	2089	2	ENSMUST00000131011.2	-937499	Cox7c
12931	chr8	70945517	70945811	295	*	samples_merged_q_0.05_peak_6355	3.50614	4.0081	1.38591	Promoter (<=1kb)	8	70945808	70956731	10924	1	ENSMUST00000008032.14	0	Crlf1
12964	chr1	65138524	65138805	282	*	samples_merged_q_0.05_peak_290	3.75467	4.7953	1.8549	Distal Intergenic	1	65139548	65142519	2972	2	ENSMUST00000154012.2	3714	Cryga
12969	chr1	66050555	66050828	274	*	samples_merged_q_0.05_peak_292	5.17774	7.23502	3.62896	Distal Intergenic	1	65965697	65967465	1769	1	ENSMUST00000114027.3	84858	Crygf
12988	chr9	57552602	57552900	299	*	samples_merged_q_0.05_peak_6648	4.65997	6.20019	2.8211	Promoter (<=1kb)	9	57537639	57552900	15262	2	ENSMUST00000216979.2	0	Csk
13018	chr8	106362985	106363335	351	*	samples_merged_q_0.05_peak_6449	3.72328	4.42312	1.57515	Promoter (<=1kb)	8	106363200	106408279	45080	1	ENSMUST00000132679.8	0	Ctcf
13047	chr5	136596029	136596477	449	*	samples_merged_q_0.05_peak_5348	10.076	17.6025	13.0765	Promoter (<=1kb)	5	136276989	136596102	319114	2	ENSMUST00000176216.9	0	Cux1
13118	chr4	115264972	115265317	346	*	samples_merged_q_0.05_peak_4924	3.33748	3.97873	1.37569	Distal Intergenic	4	115268821	115296231	27411	1	ENSMUST00000094887.4	-3504	Cyp4a12b
13138	chr9	108140585	108140923	339	*	samples_merged_q_0.05_peak_6750	4.78707	6.40169	2.92722	Promoter (<=1kb)	9	108095415	108140908	45494	2	ENSMUST00000194698.2	0	Dag1
13176	chr18	72633740	72634030	291	*	samples_merged_q_0.05_peak_3300	4.71002	6.12072	2.78461	Distal Intergenic	18	71386705	72484140	1097436	2	ENSMUST00000114943.11	-149600	Dcc
13177	chr17	24652450	24652740	291	*	samples_merged_q_0.05_peak_2923	4.14219	5.21023	2.0456	Exon (ENSMUST00000234731.2/13177, exon 2 of 2)	17	24656358	24658194	1837	1	ENSMUST00000235124.2	-3618	Eci1
13215	chr8	22328732	22329008	277	*	samples_merged_q_0.05_peak_6212	3.61397	4.18345	1.42191	Promoter (<=1kb)	8	22329942	22333498	3557	1	ENSMUST00000006745.4	-934	Defb2
13405	chrX	82033981	82034303	323	*	samples_merged_q_0.05_peak_7227	3.61397	4.18345	1.42191	Intron (ENSMUST00000127295.8/13405, intron 1 of 6)	20	81992509	84249747	2257239	1	ENSMUST00000114000.8	41472	Dmd
13435	chr12	3898896	3899161	266	*	samples_merged_q_0.05_peak_1316	4.12126	5.05733	2.02812	Promoter (<=1kb)	12	3899635	3957887	58253	1	ENSMUST00000174483.8	-474	Dnmt3a
13518	chr1	34348685	34348952	268	*	samples_merged_q_0.05_peak_189	6.013	8.60533	4.74735	Distal Intergenic	1	34333527	34345732	12206	1	ENSMUST00000182507.4	15158	Dst
13537	chr2	127177957	127178326	370	*	samples_merged_q_0.05_peak_3900	4.80247	6.42621	2.95056	Promoter (<=1kb)	2	127178079	127180296	2218	1	ENSMUST00000028846.7	0	Dusp2
13560	chr17	24689197	24689681	485	*	samples_merged_q_0.05_peak_2924	5.17774	7.23502	3.62896	Promoter (<=1kb)	17	24662753	24689287	26535	2	ENSMUST00000226654.2	0	E4f1
13640	chr17	63359970	63360326	357	*	samples_merged_q_0.05_peak_3036	4.06188	4.96047	1.98601	Distal Intergenic	17	62911179	63188312	277134	2	ENSMUST00000076840.12	-171658	Efna5
13684	chr3	138233332	138233742	411	*	samples_merged_q_0.05_peak_4501	3.42225	4.2824	1.44679	Promoter (<=1kb)	3	138233057	138261435	28379	1	ENSMUST00000200100.2	275	Eif4e
13688	chr10	61291366	61291866	501	*	samples_merged_q_0.05_peak_858	3.33748	3.97873	1.37569	Promoter (2-3kb)	10	61264270	61288440	24171	2	ENSMUST00000020288.15	-2926	Eif4ebp2
13710	chr1	135143405	135143669	265	*	samples_merged_q_0.05_peak_514	5.16818	7.01795	3.48395	Distal Intergenic	1	135184395	135185387	993	2	ENSMUST00000188895.2	41718	Elf3
13710	chr1	135159733	135160009	277	*	samples_merged_q_0.05_peak_515	4.72478	6.14518	2.80611	Exon (ENSMUST00000110798.5/ENSMUST00000110798.5, exon 1 of 1)	1	135184395	135185387	993	2	ENSMUST00000188895.2	25378	Elf3
13733	chr17	57653647	57653969	323	*	samples_merged_q_0.05_peak_3011	5.17774	7.23502	3.62896	Distal Intergenic	17	57665691	57790527	124837	1	ENSMUST00000086763.13	-11722	Adgre1
13839	chr5	84534961	84535248	288	*	samples_merged_q_0.05_peak_5249	4.06188	4.96047	1.98601	Intron (ENSMUST00000053733.15/13839, intron 1 of 15)	5	84205650	84564665	359016	2	ENSMUST00000113403.8	29417	Epha5
13858	chr4	109137245	109137802	558	*	samples_merged_q_0.05_peak_4905	9.88649	21.7706	17.068	Promoter (<=1kb)	4	109137465	109245014	107550	1	ENSMUST00000102729.10	0	Eps15
14007	chr2	7963048	7963331	284	*	samples_merged_q_0.05_peak_3501	3.80249	5.07751	2.04132	Distal Intergenic	2	7398887	7514374	115488	2	ENSMUST00000182037.2	-448674	Celf2
14029	chr2	74486091	74486396	306	*	samples_merged_q_0.05_peak_3705	4.21629	5.21428	2.0456	Exon (ENSMUST00000001867.13/14029, exon 3 of 3)	2	74485960	74489763	3804	2	ENSMUST00000173623.2	3367	Evx2
14042	chr15	53294605	53294903	299	*	samples_merged_q_0.05_peak_2466	3.33748	3.97873	1.37569	Distal Intergenic	15	52927434	53209555	282122	2	ENSMUST00000077273.9	-85050	Ext1
14049	chr2	165417859	165418151	293	*	samples_merged_q_0.05_peak_3983	4.14219	5.21023	2.0456	Distal Intergenic	2	165436952	165613639	176688	1	ENSMUST00000088132.13	-18801	Eya2
140492	chr18	45784925	45785451	527	*	samples_merged_q_0.05_peak_3245	4.71002	6.12072	2.78461	Promoter (2-3kb)	18	45788320	45818462	30143	1	ENSMUST00000236405.2	-2869	Kcnn2
14062	chr13	95754604	95755118	515	*	samples_merged_q_0.05_peak_1898	5.96973	8.53181	4.70547	Promoter (<=1kb)	13	95738311	95754995	16685	2	ENSMUST00000059193.7	0	F2r
14073	chr4	115874561	115875051	491	*	samples_merged_q_0.05_peak_4926	4.81862	6.30189	2.854	Promoter (<=1kb)	4	115824342	115874872	50531	2	ENSMUST00000125761.8	0	Faah
140780	chr5	97145268	97145692	425	*	samples_merged_q_0.05_peak_5290	6.82009	10.4178	6.38003	Promoter (<=1kb)	5	97145548	97217508	71961	1	ENSMUST00000112974.6	0	Bmp2k
14105	chr4	135583525	135583948	424	*	samples_merged_q_0.05_peak_4972	8.3534	13.9289	9.59207	Promoter (<=1kb)	4	135583443	135586542	3100	1	ENSMUST00000129718.2	82	Srsf10
14107	chr8	45390971	45391232	262	*	samples_merged_q_0.05_peak_6270	4.21629	5.21428	2.0456	Promoter (2-3kb)	8	45388484	45505294	116811	1	ENSMUST00000191428.7	2487	Fat1
14151	chr18	64590675	64590943	269	*	samples_merged_q_0.05_peak_3290	4.09049	5.00703	2.0233	3' UTR	18	64590965	64597397	6433	2	ENSMUST00000238082.2	6454	Fech
14158	chr17	64043555	64043821	267	*	samples_merged_q_0.05_peak_3042	4.70802	6.11741	2.78461	Distal Intergenic	17	64170057	64230392	60336	1	ENSMUST00000233225.2	-126236	Fer
14163	chrX	149825927	149826214	288	*	samples_merged_q_0.05_peak_7602	3.69655	4.5237	1.63575	Promoter (2-3kb)	20	149829146	149872517	43372	1	ENSMUST00000112685.8	-2932	Fgd1
14169	chr14	124921477	124921765	289	*	samples_merged_q_0.05_peak_2282	4.21629	5.21428	2.0456	Distal Intergenic	14	124215319	124914539	699221	2	ENSMUST00000095529.10	-6938	Fgf14
14194	chr1	175452729	175453011	283	*	samples_merged_q_0.05_peak_629	5.664	8.02145	4.28925	Promoter (<=1kb)	1	175442342	175453139	10798	2	ENSMUST00000154956.3	128	Fh1
142688	chr13	3740352	3740642	291	*	samples_merged_q_0.05_peak_1655	4.38161	5.58774	2.36382	Distal Intergenic	13	3684099	3692825	8727	1	ENSMUST00000141967.2	56253	Asb13
14359	chr3	34073854	34074574	721	*	samples_merged_q_0.05_peak_4147	4.81862	6.30189	2.854	Promoter (<=1kb)	3	34074092	34123491	49400	1	ENSMUST00000001620.13	0	Fxr1
14380	chr5	61920864	61921174	311	*	samples_merged_q_0.05_peak_5192	3.53251	4.05064	1.38591	Distal Intergenic	5	61966159	61968506	2348	1	ENSMUST00000053876.5	-44985	G6pd2
14391	chr2	126517425	126517745	321	*	samples_merged_q_0.05_peak_3899	5.43282	7.89099	4.16907	Promoter (<=1kb)	2	126469362	126517488	48127	2	ENSMUST00000110425.9	0	Gabpb1
14395	chr5	71199027	71199318	292	*	samples_merged_q_0.05_peak_5216	4.81862	6.30189	2.854	Intron (ENSMUST00000197284.5/14395, intron 3 of 9)	5	71118298	71171027	52730	2	ENSMUST00000197124.5	-28000	Gabra2
14395	chr5	71237242	71237623	382	*	samples_merged_q_0.05_peak_5217	3.33748	3.97873	1.37569	Intron (ENSMUST00000197284.5/14395, intron 3 of 9)	5	71118404	71251983	133580	2	ENSMUST00000000572.7	14360	Gabra2
14395	chr5	71377328	71377617	290	*	samples_merged_q_0.05_peak_5218	5.42095	7.43979	3.75036	Distal Intergenic	5	71114940	71253192	138253	2	ENSMUST00000197284.5	-124136	Gabra2
14404	chrX	71334085	71334500	416	*	samples_merged_q_0.05_peak_7154	3.75467	4.7953	1.8549	Distal Intergenic	20	71312574	71318409	5836	2	ENSMUST00000153740.2	-15676	Gabre
14408	chr4	33112015	33112330	316	*	samples_merged_q_0.05_peak_4677	4.00583	4.86985	1.91261	Distal Intergenic	4	33132521	33163588	31068	1	ENSMUST00000029947.6	-20191	Gabrr1
14538	chr13	41064224	41064604	381	*	samples_merged_q_0.05_peak_1763	5.17774	7.23502	3.62896	Intron (ENSMUST00000110191.10/14538, intron 1 of 2)	13	41071077	41114368	43292	1	ENSMUST00000067778.8	-6473	Gcnt2
14559	chr8	70768268	70768543	276	*	samples_merged_q_0.05_peak_6353	3.49383	3.98832	1.3804	Promoter (<=1kb)	8	70768425	70784242	15818	1	ENSMUST00000165819.9	0	Gdf1
14579	chr4	11685626	11685886	261	*	samples_merged_q_0.05_peak_4583	4.11951	5.05447	2.02812	Distal Intergenic	4	11704457	11714752	10296	1	ENSMUST00000108304.9	-18571	Gem
14629	chr9	77661643	77662064	422	*	samples_merged_q_0.05_peak_6679	10.3555	19.3887	14.7598	Promoter (<=1kb)	9	77661817	77701767	39951	1	ENSMUST00000034905.9	0	Gclc
14634	chr13	15638353	15638631	279	*	samples_merged_q_0.05_peak_1706	3.53251	4.05064	1.38591	Promoter (<=1kb)	13	15638565	15904611	266047	1	ENSMUST00000110510.4	0	Gli3
14678	chr9	107512452	107512713	262	*	samples_merged_q_0.05_peak_6748	4.65997	6.20019	2.8211	Promoter (<=1kb)	9	107491324	107512511	21188	2	ENSMUST00000192615.6	0	Gnai2
14707	chr3	146205431	146205729	299	*	samples_merged_q_0.05_peak_4511	6.06475	8.90879	5.01868	Promoter (<=1kb)	3	146205562	146211327	5766	1	ENSMUST00000090031.12	0	Gng5
14708	chr10	80830644	80831071	428	*	samples_merged_q_0.05_peak_910	4.41073	5.63422	2.4059	Promoter (2-3kb)	10	80787021	80834024	47004	2	ENSMUST00000118465.8	2953	Gng7
14802	chr9	4707765	4708051	287	*	samples_merged_q_0.05_peak_6495	4.08491	5.12098	2.0456	Intron (ENSMUST00000063508.15/14802, intron 3 of 16)	9	4417899	4795519	377621	2	ENSMUST00000212533.2	87468	Gria4
14806	chr10	49763887	49764150	264	*	samples_merged_q_0.05_peak_817	4.1939	5.17707	2.0456	Distal Intergenic	10	48970929	49664862	693934	2	ENSMUST00000218823.2	-99025	Grik2
14814	chr7	45515611	45515949	339	*	samples_merged_q_0.05_peak_5910	3.53251	4.05064	1.38591	Promoter (<=1kb)	7	45481307	45516553	35247	2	ENSMUST00000002848.10	604	Grin2d
15166	chr10	79552522	79552867	346	*	samples_merged_q_0.05_peak_902	3.69655	4.5237	1.63575	Promoter (<=1kb)	10	79552468	79571942	19475	1	ENSMUST00000099513.8	54	Hcn2
15192	chr13	26819686	26820406	721	*	samples_merged_q_0.05_peak_1729	5.15036	6.98864	3.45714	Distal Intergenic	13	26952156	26954148	1993	2	ENSMUST00000055915.6	133742	Hdgfl1
15229	chr13	98492171	98492436	266	*	samples_merged_q_0.05_peak_1900	5.94832	8.49557	4.67177	Promoter (1-2kb)	13	98490750	98495813	5064	1	ENSMUST00000105098.6	1421	Foxd1
15251	chr12	73954418	73954732	315	*	samples_merged_q_0.05_peak_1526	5.42095	7.43979	3.75036	Promoter (<=1kb)	12	73954678	73979850	25173	1	ENSMUST00000110464.8	0	Hif1a
15331	chr4	133694621	133695179	559	*	samples_merged_q_0.05_peak_4967	4.14219	5.21023	2.0456	Promoter (<=1kb)	4	133692301	133694752	2452	2	ENSMUST00000105893.8	0	Hmgn2
15361	chr17	27775385	27775711	327	*	samples_merged_q_0.05_peak_2927	3.33748	3.97873	1.37569	Promoter (<=1kb)	17	27775471	27781820	6350	1	ENSMUST00000118599.9	0	Hmga1
15370	chr15	101151902	101152271	370	*	samples_merged_q_0.05_peak_2599	5.42095	7.43979	3.75036	Promoter (<=1kb)	15	101152150	101172676	20527	1	ENSMUST00000228985.2	0	Nr4a1
15410	chr11	96223569	96224015	447	*	samples_merged_q_0.05_peak_1262	4.21629	5.21428	2.0456	Intron (ENSMUST00000093944.10/15410, intron 1 of 3)	11	96218888	96235129	16242	1	ENSMUST00000123091.8	4681	Hoxb3
15510	chr1	55126962	55127405	444	*	samples_merged_q_0.05_peak_269	4.15862	5.41808	2.20975	Promoter (<=1kb)	1	55116994	55127183	10190	2	ENSMUST00000027123.15	0	Hspd1
15925	chr19	37339773	37340351	579	*	samples_merged_q_0.05_peak_3452	10.6227	24.7689	19.9978	Promoter (<=1kb)	19	37246142	37340010	93869	2	ENSMUST00000131070.3	0	Ide
16001	chr7	67601169	67601719	551	*	samples_merged_q_0.05_peak_6003	12.3638	23.2701	18.5296	Promoter (<=1kb)	7	67602575	67883416	280842	1	ENSMUST00000005671.10	-856	Igf1r
16009	chr11	7210357	7210654	298	*	samples_merged_q_0.05_peak_1049	5.08276	7.33658	3.70729	Distal Intergenic	11	7157686	7163923	6238	2	ENSMUST00000135887.3	-46434	Igfbp3
16009	chr11	7319809	7320071	263	*	samples_merged_q_0.05_peak_1050	5.88752	8.39308	4.58091	Distal Intergenic	11	7157686	7163923	6238	2	ENSMUST00000135887.3	-155886	Igfbp3
16188	chr14	8110843	8111123	281	*	samples_merged_q_0.05_peak_1986	3.69655	4.5237	1.63575	Distal Intergenic	14	8119006	8120142	1137	2	ENSMUST00000224415.2	9019	Il3ra
16201	chr9	21293383	21293667	285	*	samples_merged_q_0.05_peak_6560	4.17185	5.65621	2.41636	Intron (ENSMUST00000067646.12/16201, intron 1 of 19)	9	21288422	21316386	27965	1	ENSMUST00000214758.2	4961	Ilf3
16211	chr11	97077913	97078203	291	*	samples_merged_q_0.05_peak_1263	6.08498	8.94192	5.05073	Promoter (<=1kb)	11	97050540	97078707	28168	2	ENSMUST00000001479.5	504	Kpnb1
16341	chr15	43199950	43200464	515	*	samples_merged_q_0.05_peak_2434	3.33748	3.97873	1.37569	Distal Intergenic	15	43113454	43146115	32662	2	ENSMUST00000022960.4	-53835	Eif3e
16392	chr13	116370850	116371199	350	*	samples_merged_q_0.05_peak_1943	4.07614	4.98365	2.00495	Distal Intergenic	13	116435931	116439887	3957	2	ENSMUST00000176444.2	68688	Isl1
16452	chr19	29228878	29229265	388	*	samples_merged_q_0.05_peak_3429	3.80249	5.07751	2.04132	Promoter (<=1kb)	19	29229228	29290480	61253	1	ENSMUST00000025705.7	0	Jak2
16468	chr13	44883567	44884203	637	*	samples_merged_q_0.05_peak_1768	3.75467	4.7953	1.8549	Promoter (<=1kb)	13	44884250	45073584	189335	1	ENSMUST00000173704.8	-47	Jarid2
16497	chr3	64879413	64879844	432	*	samples_merged_q_0.05_peak_4255	6.5667	9.74615	5.77129	Intron (ENSMUST00000238901.2/16497, intron 1 of 13)	3	64884839	65284301	399463	1	ENSMUST00000239069.2	-4995	Kcnab1
16508	chr6	21512279	21512802	524	*	samples_merged_q_0.05_peak_5441	5.37276	7.35839	3.72694	Intron (ENSMUST00000081542.6/16508, intron 1 of 5)	6	21215502	21729804	514303	1	ENSMUST00000081542.6	296777	Kcnd2
16512	chr15	99122471	99122732	262	*	samples_merged_q_0.05_peak_2594	3.62442	4.27018	1.44233	Promoter (<=1kb)	15	99122742	99140698	17957	1	ENSMUST00000041415.5	-10	Kcnh3
16519	chr2	54977160	54977494	335	*	samples_merged_q_0.05_peak_3656	3.61397	4.18345	1.42191	Intron (ENSMUST00000112636.8/271786, intron 10 of 11)	2	55301802	55311362	9561	1	ENSMUST00000155997.2	-324308	Kcnj3
16554	chr14	64901038	64901324	287	*	samples_merged_q_0.05_peak_2096	4.75866	6.20152	2.8211	Intron (ENSMUST00000224126.2/16554, intron 1 of 7)	14	64890051	65047066	157016	1	ENSMUST00000224503.2	10987	Kif13b
16582	chr8	95868907	95869290	384	*	samples_merged_q_0.05_peak_6412	6.47627	9.59271	5.62524	Promoter (<=1kb)	8	95826456	95869175	42720	2	ENSMUST00000034240.15	0	Kifc3
16648	chr14	61624040	61624339	300	*	samples_merged_q_0.05_peak_2091	4.65997	6.20019	2.8211	Intron (ENSMUST00000022496.9/16648, intron 7 of 16)	14	61607764	61610540	2777	2	ENSMUST00000225207.2	-13500	Kpna3
16656	chr4	119861557	119861825	269	*	samples_merged_q_0.05_peak_4933	4.70802	6.11741	2.78461	Intron (ENSMUST00000106307.9/16656, intron 2 of 8)	4	119889963	119922260	32298	1	ENSMUST00000227491.2	-28138	Hivep3
16795	chr8	73891817	73892081	265	*	samples_merged_q_0.05_peak_6365	5.69551	8.31056	4.5373	Intron (ENSMUST00000004497.11/16795, intron 2 of 14)	8	73771692	73825541	53850	2	ENSMUST00000146249.2	-66276	Large1
16871	chr2	26078846	26079182	337	*	samples_merged_q_0.05_peak_3566	4.81862	6.30189	2.854	Intron (ENSMUST00000133025.2/ENSMUST00000133025.2, intron 1 of 1)	2	26090228	26092878	2651	2	ENSMUST00000127035.2	13696	Lhx3
16897	chr11	60590499	60590781	283	*	samples_merged_q_0.05_peak_1210	4.15862	5.41808	2.20975	Promoter (<=1kb)	11	60590549	60605012	14464	1	ENSMUST00000052346.10	0	Llgl1
16911	chr3	143911056	143911460	405	*	samples_merged_q_0.05_peak_4506	4.00583	4.86985	1.91261	Promoter (<=1kb)	3	143894444	143910981	16538	2	ENSMUST00000196264.5	-75	Lmo4
16974	chr6	134543461	134544182	722	*	samples_merged_q_0.05_peak_5783	5.18613	7.04752	3.50847	Promoter (<=1kb)	6	134423439	134543876	120438	2	ENSMUST00000032322.15	0	Lrp6
16977	chr6	124761246	124761512	267	*	samples_merged_q_0.05_peak_5749	4.21629	5.21428	2.0456	Distal Intergenic	6	124746832	124756690	9859	2	ENSMUST00000112475.9	-4556	Lrrc23
17087	chr1	16856716	16857022	307	*	samples_merged_q_0.05_peak_107	4.71154	6.28175	2.854	Distal Intergenic	1	16758732	16779761	21030	1	ENSMUST00000190366.2	97984	Ly96
170930	chr11	115427060	115427330	271	*	samples_merged_q_0.05_peak_1300	4.65997	6.20019	2.8211	Promoter (<=1kb)	11	115413928	115427102	13175	2	ENSMUST00000153892.2	0	Sumo2
17122	chr5	34344855	34345120	266	*	samples_merged_q_0.05_peak_5084	4.81862	6.30189	2.854	Promoter (<=1kb)	5	34331231	34345054	13824	2	ENSMUST00000042701.13	0	Mxd4
17145	chrX	91253096	91253380	285	*	samples_merged_q_0.05_peak_7277	6.02328	8.62283	4.74735	Intron (ENSMUST00000113955.2/215641, intron 3 of 4)	20	91058797	91059939	1143	2	ENSMUST00000072269.2	-193157	Mageb1
17155	chr10	54002130	54002474	345	*	samples_merged_q_0.05_peak_843	3.61397	4.18345	1.42191	Distal Intergenic	10	53783540	53952705	169166	2	ENSMUST00000220088.2	-49425	Man1a
17158	chr17	64907668	64908099	432	*	samples_merged_q_0.05_peak_3044	4.00583	4.86985	1.91261	Promoter (<=1kb)	17	64907731	65062105	154375	1	ENSMUST00000086723.10	0	Man2a1
17169	chr12	111598392	111598705	314	*	samples_merged_q_0.05_peak_1624	5.04592	6.81798	3.30186	Intron (ENSMUST00000075281.8/17169, intron 12 of 15)	12	111590943	111594860	3918	1	ENSMUST00000221923.2	7449	Mark3
17192	chr10	80234745	80235062	318	*	samples_merged_q_0.05_peak_906	3.69655	4.5237	1.63575	Promoter (<=1kb)	10	80228673	80235256	6584	2	ENSMUST00000105348.8	194	Mbd3
17196	chr18	82459862	82460192	331	*	samples_merged_q_0.05_peak_3325	4.69137	6.08989	2.78461	Distal Intergenic	18	82493271	82576828	83558	1	ENSMUST00000091789.11	-33079	Mbp
17260	chr13	83404862	83405141	280	*	samples_merged_q_0.05_peak_1857	4.12126	5.05733	2.02812	Distal Intergenic	13	83652153	83811462	159310	1	ENSMUST00000198199.5	-247012	Mef2c
17330	chr19	32453256	32453686	431	*	samples_merged_q_0.05_peak_3436	4.62597	5.98233	2.69437	Distal Intergenic	19	32463169	32492764	29596	1	ENSMUST00000025827.10	-9483	Minpp1
17344	chr18	77153134	77153424	291	*	samples_merged_q_0.05_peak_3311	4.64215	6.00885	2.71762	Promoter (<=1kb)	18	77153386	77234633	81248	1	ENSMUST00000114776.4	0	Pias2
17381	chr9	7311675	7311941	267	*	samples_merged_q_0.05_peak_6507	3.80249	5.07751	2.04132	Distal Intergenic	9	7344381	7349787	5407	1	ENSMUST00000150167.2	-32440	Mmp12
17425	chr5	142387028	142387522	495	*	samples_merged_q_0.05_peak_5354	10.4296	22.1434	17.4322	Promoter (<=1kb)	5	142387252	142405375	18124	1	ENSMUST00000198422.2	0	Foxk1
17428	chr11	74721519	74721845	327	*	samples_merged_q_0.05_peak_1234	5.23983	8.82003	4.93308	Promoter (<=1kb)	11	74721746	74736551	14806	1	ENSMUST00000000291.9	0	Mnt
17475	chr4	81175617	81175956	340	*	samples_merged_q_0.05_peak_4816	3.53251	4.05064	1.38591	Distal Intergenic	4	81201227	81202936	1710	2	ENSMUST00000156441.8	26980	Mpdz
17685	chr17	88053301	88053693	393	*	samples_merged_q_0.05_peak_3089	5.29877	7.23435	3.62896	3' UTR	17	88003969	88025106	21138	1	ENSMUST00000174703.2	49332	Msh2
17691	chr17	32074510	32074956	447	*	samples_merged_q_0.05_peak_2936	6.6256	9.8468	5.83002	Promoter (<=1kb)	17	32063224	32074778	11555	2	ENSMUST00000024839.6	0	Sik1
17761	chr10	20024635	20024944	310	*	samples_merged_q_0.05_peak_713	4.0197	4.8922	1.93086	Promoter (<=1kb)	10	20024730	20157336	132607	1	ENSMUST00000116259.5	0	Map7
17830	chr5	88493204	88493492	289	*	samples_merged_q_0.05_peak_5273	5.42095	7.43979	3.75036	Distal Intergenic	5	88465171	88476673	11503	1	ENSMUST00000170832.3	28033	Prol1
17870	chrX	5389386	5389656	271	*	samples_merged_q_0.05_peak_6777	4.21629	5.21428	2.0456	Distal Intergenic	20	5378952	5381319	2368	2	ENSMUST00000058404.5	-8067	Mycs
17925	chr8	71725257	71725554	298	*	samples_merged_q_0.05_peak_6359	4.59394	5.92998	2.64904	Promoter (<=1kb)	8	71725358	71813356	87999	1	ENSMUST00000170242.8	0	Myo9b
17957	chr2	148570527	148570811	285	*	samples_merged_q_0.05_peak_3948	4.51579	5.80308	2.54315	Intron (ENSMUST00000136513.2/17957, intron 1 of 9)	2	148548338	148574311	25974	2	ENSMUST00000140647.2	3500	Napb
17968	chr16	80571890	80572205	316	*	samples_merged_q_0.05_peak_2826	5.29652	7.23059	3.62896	Distal Intergenic	16	80997585	81394693	397109	1	ENSMUST00000037785.14	-425380	Ncam2
17979	chr2	165834701	165834980	280	*	samples_merged_q_0.05_peak_3984	4.17185	5.65621	2.41636	Promoter (<=1kb)	2	165834557	165915162	80606	1	ENSMUST00000088095.6	144	Ncoa3
17984	chr7	61946858	61947133	276	*	samples_merged_q_0.05_peak_5985	5.08276	7.33658	3.70729	Distal Intergenic	7	61996317	62000010	3694	1	ENSMUST00000038775.6	-49184	Ndn
17986	chrX	16731425	16731697	273	*	samples_merged_q_0.05_peak_6835	4.65997	6.20019	2.8211	Distal Intergenic	20	16751760	16778013	26254	2	ENSMUST00000040134.8	46316	Ndp
17993	chr13	114406826	114407120	295	*	samples_merged_q_0.05_peak_1939	6.6256	9.8468	5.83002	Distal Intergenic	13	114425184	114524585	99402	2	ENSMUST00000225707.2	117465	Ndufs4
17999	chr9	72569417	72569810	394	*	samples_merged_q_0.05_peak_6670	5.72262	8.11817	4.37891	Promoter (<=1kb)	9	72569628	72657134	87507	1	ENSMUST00000034740.15	0	Nedd4
18004	chr8	61471307	61471607	301	*	samples_merged_q_0.05_peak_6317	3.44546	3.91103	1.33468	Intron (ENSMUST00000120689.8/18004, intron 5 of 33)	8	61446299	61583942	137644	1	ENSMUST00000211672.2	25008	Nek1
18013	chr11	98218781	98219066	286	*	samples_merged_q_0.05_peak_1267	4.21629	5.21428	2.0456	Promoter (1-2kb)	11	98216241	98220474	4234	2	ENSMUST00000041685.7	1408	Neurod2
18103	chr11	93850870	93851138	269	*	samples_merged_q_0.05_peak_1258	3.61397	4.18345	1.42191	Intron (ENSMUST00000170303.2/18103, intron 4 of 7)	11	93840640	93847085	6446	2	ENSMUST00000021217.11	-3785	Nme2
18139	chr6	83830067	83830331	265	*	samples_merged_q_0.05_peak_5654	5.22241	7.10744	3.56276	Distal Intergenic	6	83844091	83906104	62014	1	ENSMUST00000204415.2	-13760	Zfp638
18181	chr6	30025432	30025790	359	*	samples_merged_q_0.05_peak_5471	4.21629	5.21428	2.0456	Distal Intergenic	6	30047987	30153457	105471	1	ENSMUST00000115212.8	-22197	Nrf1
18213	chr7	77298143	77298451	309	*	samples_merged_q_0.05_peak_6030	4.21629	5.21428	2.0456	Distal Intergenic	7	77830631	77842491	11861	2	ENSMUST00000205354.2	544040	Ntrk3
18232	chr2	23263296	23263574	279	*	samples_merged_q_0.05_peak_3562	3.42177	3.87342	1.30639	Intron (ENSMUST00000102945.2/18232, intron 1 of 1)	2	23211258	23291985	80728	1	ENSMUST00000102945.2	52038	Nxph2
18387	chr1	5639339	5639612	274	*	samples_merged_q_0.05_peak_55	4.71002	6.12072	2.78461	Distal Intergenic	1	5658716	5676354	17639	1	ENSMUST00000160777.8	-19104	Oprk1
18390	chr10	6307138	6307398	261	*	samples_merged_q_0.05_peak_676	5.17774	7.23502	3.62896	Distal Intergenic	10	6708506	6929704	221199	1	ENSMUST00000147171.8	-401108	Oprm1
18438	chr5	122861777	122862098	322	*	samples_merged_q_0.05_peak_5322	3.50614	4.0081	1.38591	Promoter (<=1kb)	5	122862718	122863328	611	1	ENSMUST00000132062.2	-620	P2rx4
18441	chr3	61058069	61058585	517	*	samples_merged_q_0.05_peak_4237	3.84803	4.7553	1.83338	Distal Intergenic	3	60910216	60916403	6188	1	ENSMUST00000193201.2	147853	P2ry1
18475	chr9	45923981	45924252	272	*	samples_merged_q_0.05_peak_6629	4.63836	6.16609	2.8211	Promoter (<=1kb)	9	45886402	45923988	37587	2	ENSMUST00000217514.2	0	Pafah1b2
18584	chr7	80862765	80863374	610	*	samples_merged_q_0.05_peak_6034	9.17808	18.4359	13.8609	Promoter (<=1kb)	7	80863344	80984281	120938	1	ENSMUST00000026672.8	0	Pde8a
18607	chr17	24360183	24360712	530	*	samples_merged_q_0.05_peak_2922	4.20129	5.30271	2.1287	Promoter (<=1kb)	17	24292654	24360569	67916	2	ENSMUST00000102927.10	0	Pdpk1
18610	chr2	129581909	129582167	259	*	samples_merged_q_0.05_peak_3907	4.21629	5.21428	2.0456	Distal Intergenic	2	129539906	129541764	1859	2	ENSMUST00000152113.2	-40145	Pdyn
18619	chr4	4217811	4218148	338	*	samples_merged_q_0.05_peak_4546	4.14219	5.21023	2.0456	Distal Intergenic	4	4134112	4138819	4708	2	ENSMUST00000133567.2	-78992	Penk
18647	chr5	5430217	5430612	396	*	samples_merged_q_0.05_peak_5016	3.62442	4.27018	1.44233	Promoter (<=1kb)	5	5058851	5430224	371374	2	ENSMUST00000134867.8	0	Cdk14
18667	chr9	8935920	8936300	381	*	samples_merged_q_0.05_peak_6517	4.81862	6.30189	2.854	Intron (ENSMUST00000189181.7/18667, intron 3 of 7)	9	8900469	8965426	64958	1	ENSMUST00000098986.4	35451	Pgr
18754	chr17	86712842	86713152	311	*	samples_merged_q_0.05_peak_3087	4.71002	6.12072	2.78461	Intron (ENSMUST00000097275.9/18754, intron 2 of 14)	17	86797990	86803540	5551	1	ENSMUST00000150486.2	-84838	Prkce
18789	chr12	105750606	105751441	836	*	samples_merged_q_0.05_peak_1609	4.64215	6.00885	2.71762	Promoter (<=1kb)	12	105750953	105805066	54114	1	ENSMUST00000109901.9	0	Papola
18938	chr19	6952329	6952587	259	*	samples_merged_q_0.05_peak_3361	4.10495	5.03064	2.02812	Promoter (<=1kb)	19	6952336	6954692	2357	1	ENSMUST00000070850.8	0	Ppp1r14b
18988	chr9	43118452	43118759	308	*	samples_merged_q_0.05_peak_6625	4.81862	6.30189	2.854	Promoter (1-2kb)	9	43035234	43117052	81819	2	ENSMUST00000176636.5	-1400	Pou2f3
18993	chr1	42736917	42737210	294	*	samples_merged_q_0.05_peak_211	4.13418	5.07852	2.04132	Promoter (1-2kb)	1	42734928	42742336	7409	1	ENSMUST00000054883.4	1989	Pou3f3
18994	chrX	109933622	109933897	276	*	samples_merged_q_0.05_peak_7390	4.17185	5.65621	2.41636	Distal Intergenic	20	109857886	109860813	2928	1	ENSMUST00000078229.5	75736	Pou3f4
19056	chr14	20596236	20596525	290	*	samples_merged_q_0.05_peak_2009	4.89697	6.57737	3.08236	Promoter (<=1kb)	14	20557739	20596508	38770	2	ENSMUST00000161989.2	0	Ppp3cb
19072	chr10	44943133	44943647	515	*	samples_merged_q_0.05_peak_798	5.2778	7.19938	3.62896	Promoter (<=1kb)	10	44943299	45043294	99996	1	ENSMUST00000099858.4	0	Prep
19088	chr12	32110982	32111281	300	*	samples_merged_q_0.05_peak_1383	3.33748	3.97873	1.37569	Promoter (<=1kb)	12	32008475	32111234	102760	2	ENSMUST00000003079.12	0	Prkar2b
19110	chr13	28241516	28241810	295	*	samples_merged_q_0.05_peak_1735	5.55031	7.83516	4.1148	Distal Intergenic	13	28200195	28207542	7348	1	ENSMUST00000021779.8	41321	Prl4a1
19118	chr16	10634791	10635078	288	*	samples_merged_q_0.05_peak_2621	4.65997	6.20019	2.8211	Distal Intergenic	16	10614190	10623703	9514	2	ENSMUST00000230568.2	-11088	Prm1
19123	chr18	32275199	32275493	295	*	samples_merged_q_0.05_peak_3211	4.71002	6.12072	2.78461	Promoter (2-3kb)	18	32266200	32272623	6424	2	ENSMUST00000234375.2	-2576	Proc
19155	chr11	97171438	97171732	295	*	samples_merged_q_0.05_peak_1264	4.78707	6.40169	2.92722	Promoter (<=1kb)	11	97096670	97171464	74795	2	ENSMUST00000001480.14	0	Npepps
19208	chr17	47070391	47070687	297	*	samples_merged_q_0.05_peak_2988	4.17185	5.65621	2.41636	Intron (ENSMUST00000041012.9/19208, intron 1 of 3)	17	47066589	47074638	8050	2	ENSMUST00000041012.9	3951	Ptcra
19212	chr2	12790702	12791090	389	*	samples_merged_q_0.05_peak_3514	5.39216	7.3911	3.75036	Distal Intergenic	2	12928852	13005791	76940	1	ENSMUST00000154269.7	-137762	Pter
192157	chr11	97253007	97253452	446	*	samples_merged_q_0.05_peak_1265	5.22241	7.10744	3.56276	Promoter (<=1kb)	11	97253261	97289368	36108	1	ENSMUST00000238729.2	0	Socs7
192198	chr6	28832288	28832979	692	*	samples_merged_q_0.05_peak_5466	6.45064	9.54944	5.59777	Promoter (<=1kb)	6	28828132	28831746	3615	2	ENSMUST00000062304.7	-542	Lrrc4
192216	chrX	79584650	79584974	325	*	samples_merged_q_0.05_peak_7211	4.62069	6.35706	2.88522	Distal Intergenic	20	80114304	80138382	24079	1	ENSMUST00000150052.2	-529330	Tmem47
192216	chrX	79912195	79912551	357	*	samples_merged_q_0.05_peak_7213	4.14219	5.21023	2.0456	Distal Intergenic	20	80114304	80138382	24079	1	ENSMUST00000150052.2	-201753	Tmem47
192216	chrX	80000969	80001307	339	*	samples_merged_q_0.05_peak_7215	4.12126	5.05733	2.02812	Distal Intergenic	20	80114304	80138382	24079	1	ENSMUST00000150052.2	-112997	Tmem47
192285	chr2	92141961	92142303	343	*	samples_merged_q_0.05_peak_3769	3.33748	3.97873	1.37569	Intron (ENSMUST00000111294.8/192285, intron 5 of 17)	2	92150774	92161043	10270	1	ENSMUST00000159727.2	-8471	Phf21a
19248	chr5	21260703	21261215	513	*	samples_merged_q_0.05_peak_5059	5.13777	7.17139	3.62107	Promoter (<=1kb)	5	21191643	21260909	69267	2	ENSMUST00000030556.8	0	Ptpn12
19249	chr5	103573082	103573354	273	*	samples_merged_q_0.05_peak_5300	4.65997	6.20019	2.8211	Promoter (<=1kb)	5	103573106	103677606	104501	1	ENSMUST00000196014.5	0	Ptpn13
192662	chr11	120472170	120472470	301	*	samples_merged_q_0.05_peak_1308	4.62069	6.35706	2.88522	Promoter (<=1kb)	11	120468930	120472450	3521	2	ENSMUST00000106197.10	0	Arhgdia
19271	chr2	90410760	90411065	306	*	samples_merged_q_0.05_peak_3763	4.62399	6.14345	2.80611	Promoter (<=1kb)	2	90263233	90410939	147707	2	ENSMUST00000168621.4	0	Ptprj
19271	chr2	90440180	90440614	435	*	samples_merged_q_0.05_peak_3765	5.94619	8.71537	4.83368	Distal Intergenic	2	90263233	90410939	147707	2	ENSMUST00000168621.4	-29241	Ptprj
19288	chr3	66128276	66128554	279	*	samples_merged_q_0.05_peak_4257	4.81862	6.30189	2.854	Promoter (<=1kb)	3	66127331	66133226	5896	1	ENSMUST00000029421.6	945	Ptx3
19290	chr18	36419801	36420105	305	*	samples_merged_q_0.05_peak_3222	4.65844	6.03562	2.74042	5' UTR	18	36414150	36425588	11439	1	ENSMUST00000051301.6	5651	Pura
19291	chr11	6438739	6439077	339	*	samples_merged_q_0.05_peak_1048	3.99206	4.8477	1.89451	Intron (ENSMUST00000127488.2/ENSMUST00000127488.2, intron 2 of 2)	11	6417599	6425917	8319	2	ENSMUST00000179343.3	-12822	Purb
192976	chr11	62539247	62539584	338	*	samples_merged_q_0.05_peak_1213	5.42095	7.43979	3.75036	Promoter (<=1kb)	11	62495710	62539349	43640	2	ENSMUST00000057194.9	0	Lrrc75a
19317	chr17	10538631	10538890	260	*	samples_merged_q_0.05_peak_2869	4.15862	5.41808	2.20975	Promoter (<=1kb)	17	10425480	10538783	113304	2	ENSMUST00000097414.11	0	Qki
19357	chr15	51854517	51854807	291	*	samples_merged_q_0.05_peak_2462	4.22806	5.34475	2.16791	Promoter (<=1kb)	15	51837233	51854906	17674	2	ENSMUST00000226529.2	99	Rad21
194309	chr5	135106925	135107233	309	*	samples_merged_q_0.05_peak_5345	7.24884	11.7496	7.57398	Promoter (<=1kb)	5	135101754	135107120	5367	2	ENSMUST00000067935.11	0	Vps37d
194401	chr6	121086862	121087197	336	*	samples_merged_q_0.05_peak_5737	3.33748	3.97873	1.37569	Promoter (<=1kb)	6	120993608	121087054	93447	2	ENSMUST00000204994.2	0	Mical3
195040	chr11	78402931	78403219	289	*	samples_merged_q_0.05_peak_1239	4.14219	5.21023	2.0456	Promoter (<=1kb)	11	78397881	78402998	5118	2	ENSMUST00000052566.8	0	Tmem199
195564	chr4	112023815	112024169	355	*	samples_merged_q_0.05_peak_4916	4.14219	5.21023	2.0456	3' UTR	4	112089442	112157665	68224	1	ENSMUST00000038455.12	-65273	Skint3
195733	chr12	24621776	24622461	686	*	samples_merged_q_0.05_peak_1366	4.1939	5.17707	2.0456	Promoter (<=1kb)	12	24622282	24667387	45106	1	ENSMUST00000085553.13	0	Grhl1
19664	chr5	53747628	53747996	369	*	samples_merged_q_0.05_peak_5153	5.51341	7.77507	4.0581	Promoter (<=1kb)	5	53747710	53814704	66995	1	ENSMUST00000201912.4	0	Rbpj
19679	chr5	124294827	124295086	260	*	samples_merged_q_0.05_peak_5328	3.69655	4.5237	1.63575	Intron (ENSMUST00000086123.11/19679, intron 1 of 23)	5	124271041	124278324	7284	2	ENSMUST00000161530.2	-16503	Pitpnm2
19695	chr6	78506614	78506997	384	*	samples_merged_q_0.05_peak_5641	4.21629	5.21428	2.0456	Distal Intergenic	6	78443252	78445855	2604	2	ENSMUST00000032089.3	-60759	Reg3g
19704	chr8	70805546	70806106	561	*	samples_merged_q_0.05_peak_6354	5.42095	7.43979	3.75036	Promoter (<=1kb)	8	70784175	70805861	21687	2	ENSMUST00000215817.2	0	Upf1
19707	chr10	17931812	17932143	332	*	samples_merged_q_0.05_peak_707	5.69551	8.31056	4.5373	Promoter (<=1kb)	10	17931752	18000892	69141	1	ENSMUST00000150029.8	60	Reps1
19762	chr18	31259117	31259388	272	*	samples_merged_q_0.05_peak_3209	4.65997	6.20019	2.8211	Intron (ENSMUST00000082070.13/19762, intron 3 of 3)	18	31286324	31345785	59462	2	ENSMUST00000153196.2	86397	Rit2
19783	chr6	69473268	69473572	305	*	samples_merged_q_0.05_peak_5603	4.71002	6.12072	2.78461	Distal Intergenic	6	69303921	69304158	238	2	ENSMUST00000198476.2	-169110	Rprl1
19783	chr6	69535724	69536084	361	*	samples_merged_q_0.05_peak_5605	4.07614	4.98365	2.00495	Distal Intergenic	6	69303921	69304158	238	2	ENSMUST00000198476.2	-231566	Rprl1
20102	chrX	101234513	101234834	322	*	samples_merged_q_0.05_peak_7339	5.24075	7.13781	3.59091	Promoter (1-2kb)	20	101228547	101233000	4454	2	ENSMUST00000033683.8	-1513	Rps4x
20135	chr12	24758161	24758519	359	*	samples_merged_q_0.05_peak_1367	5.02892	6.79036	3.27613	Promoter (<=1kb)	12	24758240	24764145	5906	1	ENSMUST00000020980.12	0	Rrm2
20182	chr17	34251053	34251326	274	*	samples_merged_q_0.05_peak_2942	4.50047	5.77834	2.52161	Promoter (<=1kb)	17	34251170	34257369	6200	1	ENSMUST00000173354.9	0	Rxrb
20186	chr10	89392718	89393131	414	*	samples_merged_q_0.05_peak_935	3.53251	4.05064	1.38591	Distal Intergenic	10	89290235	89369447	79213	2	ENSMUST00000105297.2	-23271	Nr1h4
20218	chr4	129629288	129629567	280	*	samples_merged_q_0.05_peak_4956	3.9246	4.73979	1.81811	Intron (ENSMUST00000129342.8/20218, intron 1 of 11)	4	129607612	129636089	28478	2	ENSMUST00000066257.6	6522	Khdrbs1
20229	chrX	153964830	153965148	319	*	samples_merged_q_0.05_peak_7617	5.17774	7.23502	3.62896	Distal Intergenic	20	153996302	153997055	754	2	ENSMUST00000134855.8	31907	Sat1
20230	chr17	52120016	52120572	557	*	samples_merged_q_0.05_peak_2997	6.02328	8.62283	4.74735	Promoter (<=1kb)	17	52046504	52119708	73205	2	ENSMUST00000140979.8	-308	Satb1
20288	chr8	40066699	40067017	319	*	samples_merged_q_0.05_peak_6253	4.21629	5.21428	2.0456	Intron (ENSMUST00000026021.14/20288, intron 6 of 9)	8	40034726	40095661	60936	2	ENSMUST00000026021.14	28644	Msr1
20357	chr16	35364871	35365136	266	*	samples_merged_q_0.05_peak_2673	6.02328	8.62283	4.74735	Promoter (2-3kb)	16	35361941	35484631	122691	1	ENSMUST00000050625.15	2930	Sema5b
20419	chr8	4776962	4777274	313	*	samples_merged_q_0.05_peak_6172	4.62597	5.98233	2.69437	Distal Intergenic	8	4788845	4796424	7580	2	ENSMUST00000207665.2	19150	Shcbp1
20429	chr3	66888497	66888780	284	*	samples_merged_q_0.05_peak_4259	6.6256	9.8468	5.83002	Promoter (<=1kb)	3	66879060	66888651	9592	2	ENSMUST00000162098.9	0	Shox2
20442	chr15	67037264	67037678	415	*	samples_merged_q_0.05_peak_2521	5.29652	7.23059	3.62896	Intron (ENSMUST00000229028.2/20442, intron 1 of 8)	15	66978134	67048561	70428	2	ENSMUST00000229742.2	10883	St3gal1
20450	chr7	73815910	73816191	282	*	samples_merged_q_0.05_peak_6015	5.88862	8.62195	4.74735	Distal Intergenic	7	73610599	73663438	52840	2	ENSMUST00000191970.2	-152472	St8sia2
20494	chr8	5484917	5485196	280	*	samples_merged_q_0.05_peak_6179	4.2091	5.20232	2.0456	Distal Intergenic	8	5133219	5155351	22133	2	ENSMUST00000023835.3	-329566	Slc10a2
20494	chr8	5567354	5567614	261	*	samples_merged_q_0.05_peak_6181	3.43357	3.89214	1.3205	Distal Intergenic	8	5133219	5155351	22133	2	ENSMUST00000023835.3	-412003	Slc10a2
20524	chr15	81234392	81234722	331	*	samples_merged_q_0.05_peak_2563	5.37276	7.35839	3.72694	Intron (ENSMUST00000023040.9/20524, intron 1 of 8)	15	81224175	81228358	4184	2	ENSMUST00000230983.2	-6034	Slc25a17
20588	chr9	109994926	109995205	280	*	samples_merged_q_0.05_peak_6759	4.15862	5.41808	2.20975	Intron (ENSMUST00000088716.12/20588, intron 8 of 27)	9	110014800	110035221	20422	1	ENSMUST00000198667.2	-19595	Smarcc1
20602	chr5	125255985	125256287	303	*	samples_merged_q_0.05_peak_5332	4.62069	6.35706	2.88522	Promoter (<=1kb)	5	125094217	125256278	162062	2	ENSMUST00000111402.9	0	Ncor2
20610	chr10	77441847	77442440	594	*	samples_merged_q_0.05_peak_889	4.71002	6.12072	2.78461	Promoter (<=1kb)	10	77441931	77454165	12235	1	ENSMUST00000020501.15	0	Sumo3
20661	chr3	108191559	108191830	272	*	samples_merged_q_0.05_peak_4411	5.17774	7.23502	3.62896	Promoter (<=1kb)	3	108191407	108268827	77421	1	ENSMUST00000102632.7	152	Sort1
20666	chr12	27422986	27423278	293	*	samples_merged_q_0.05_peak_1373	5.08276	7.33658	3.70729	Distal Intergenic	12	27384263	27392573	8311	2	ENSMUST00000079063.7	-30413	Sox11
20675	chrX	59922368	59922666	299	*	samples_merged_q_0.05_peak_7050	4.71002	6.12072	2.78461	Distal Intergenic	20	59934972	59937036	2065	2	ENSMUST00000135107.4	14370	Sox3
20675	chrX	59936665	59937046	382	*	samples_merged_q_0.05_peak_7051	4.81862	6.30189	2.854	Promoter (<=1kb)	20	59934972	59937036	2065	2	ENSMUST00000135107.4	0	Sox3
20690	chr6	24808733	24809033	301	*	samples_merged_q_0.05_peak_5454	5.08276	7.33658	3.70729	Distal Intergenic	6	24795823	24801047	5225	1	ENSMUST00000031693.3	12910	Spam1
207157	chr6	101731504	101731863	360	*	samples_merged_q_0.05_peak_5687	4.81862	6.30189	2.854	Distal Intergenic	6	101751210	101778943	27734	1	ENSMUST00000204837.3	-19347	Gm9871
207259	chr18	75953065	75953381	317	*	samples_merged_q_0.05_peak_3310	4.12126	5.05733	2.02812	Promoter (<=1kb)	18	75953249	76281635	328387	1	ENSMUST00000058997.15	0	Zbtb7c
20729	chr13	51255073	51255379	307	*	samples_merged_q_0.05_peak_1782	6.06475	8.90879	5.01868	Promoter (<=1kb)	13	51254916	51306582	51667	1	ENSMUST00000095797.6	157	Spin1
207565	chr5	122917350	122917647	298	*	samples_merged_q_0.05_peak_5323	4.62597	5.98233	2.69437	Promoter (<=1kb)	5	122869233	122917445	48213	2	ENSMUST00000111668.8	0	Camkk2
207667	chr9	63056099	63056454	356	*	samples_merged_q_0.05_peak_6655	4.12126	5.05733	2.02812	Promoter (<=1kb)	9	63045452	63056243	10792	2	ENSMUST00000116613.9	0	Skor1
20779	chr2	157266145	157266533	389	*	samples_merged_q_0.05_peak_3972	4.71002	6.12072	2.78461	Promoter (<=1kb)	2	157266200	157313782	47583	1	ENSMUST00000029175.14	0	Src
207806	chr16	43993530	43993945	416	*	samples_merged_q_0.05_peak_2683	4.58904	6.55746	3.06387	Promoter (<=1kb)	16	43993609	44047828	54220	1	ENSMUST00000119746.8	0	Usf3
20807	chr17	46866479	46867265	787	*	samples_merged_q_0.05_peak_2986	5.08276	7.33658	3.70729	Promoter (<=1kb)	17	46859255	46867101	7847	2	ENSMUST00000015749.7	0	Srf
20815	chr17	28841258	28841569	312	*	samples_merged_q_0.05_peak_2929	4.14219	5.21023	2.0456	Promoter (<=1kb)	17	28806622	28841461	34840	2	ENSMUST00000233440.2	0	Srpk1
20815	chr17	28848795	28849173	379	*	samples_merged_q_0.05_peak_2930	4.65997	6.20019	2.8211	Distal Intergenic	17	28806622	28841683	35062	2	ENSMUST00000130643.9	-7112	Srpk1
208166	chr16	45288537	45288855	319	*	samples_merged_q_0.05_peak_2689	5.88752	8.39308	4.58091	Intron (ENSMUST00000232138.2/208166, intron 1 of 3)	16	45232131	45275341	43211	2	ENSMUST00000144346.2	-13196	Cd200l1
20840	chr9	111594649	111594963	315	*	samples_merged_q_0.05_peak_6762	3.33748	3.97873	1.37569	Distal Intergenic	9	111390505	111519416	128912	2	ENSMUST00000035083.8	-75233	Stac
208643	chr16	20491634	20491987	354	*	samples_merged_q_0.05_peak_2644	5.70294	8.08565	4.34854	Promoter (<=1kb)	16	20492045	20511634	19590	1	ENSMUST00000156226.8	-58	Eif4g1
20868	chr11	32564621	32564896	276	*	samples_merged_q_0.05_peak_1153	3.53251	4.05064	1.38591	Exon (ENSMUST00000102821.4/20868, exon 16 of 19)	11	32538595	32548528	9934	1	ENSMUST00000143397.2	26026	Stk10
208777	chr1	93178223	93178664	442	*	samples_merged_q_0.05_peak_344	4.14219	5.21023	2.0456	Intron (ENSMUST00000062202.14/208777, intron 1 of 30)	1	93163573	93212229	48657	1	ENSMUST00000172289.8	14650	Sned1
208869	chr9	107108787	107109177	391	*	samples_merged_q_0.05_peak_6747	4.11951	5.05447	2.02812	Promoter (<=1kb)	9	106770024	107109108	339085	2	ENSMUST00000044532.11	0	Dock3
20893	chr6	108636684	108636944	261	*	samples_merged_q_0.05_peak_5709	4.07614	4.98365	2.00495	Promoter (<=1kb)	6	108637590	108643886	6297	1	ENSMUST00000032194.11	-646	Bhlhe40
209039	chr15	102008625	102008987	363	*	samples_merged_q_0.05_peak_2600	4.12126	5.05733	2.02812	Promoter (<=1kb)	15	102008848	102024431	15584	1	ENSMUST00000228958.2	0	Tns2
209131	chr4	59862597	59862898	302	*	samples_merged_q_0.05_peak_4741	4.6099	5.95604	2.67127	Intron (ENSMUST00000030080.7/209131, intron 2 of 8)	4	59884694	59900533	15840	1	ENSMUST00000145199.8	-21796	Snx30
20917	chr6	95609888	95610151	264	*	samples_merged_q_0.05_peak_5672	6.02328	8.62283	4.74735	Intron (ENSMUST00000204224.3/20917, intron 2 of 10)	6	95543466	95620990	77525	2	ENSMUST00000203071.2	10839	Suclg2
209225	chr7	79659475	79659780	306	*	samples_merged_q_0.05_peak_6033	4.17881	5.15208	2.0456	Distal Intergenic	7	79674562	79743921	69360	1	ENSMUST00000164056.9	-14782	Zfp710
209361	chr2	9991527	9992530	1004	*	samples_merged_q_0.05_peak_3506	5.29877	7.23435	3.62896	Intron (ENSMUST00000026888.11/209361, intron 2 of 6)	2	9919365	9958468	39104	2	ENSMUST00000114909.2	-33059	Taf3
209478	chr19	38816512	38817119	608	*	samples_merged_q_0.05_peak_3457	4.14219	5.21023	2.0456	Distal Intergenic	19	38825023	38908367	83345	1	ENSMUST00000037302.6	-7904	Tbc1d12
20965	chr6	115232661	115232938	278	*	samples_merged_q_0.05_peak_5726	4.81862	6.30189	2.854	Promoter (2-3kb)	6	115229956	115255670	25715	1	ENSMUST00000204726.2	2705	Syn2
20970	chr4	130519720	130520195	476	*	samples_merged_q_0.05_peak_4957	5.24075	7.13781	3.59091	Promoter (<=1kb)	4	130519848	130553630	33783	1	ENSMUST00000070478.4	0	Sdc3
210027	chr8	127023728	127024017	290	*	samples_merged_q_0.05_peak_6469	3.61397	4.18345	1.42191	Promoter (1-2kb)	8	127025297	127122221	96925	1	ENSMUST00000108759.3	-1280	Slc35f3
210106	chr13	69682754	69683209	456	*	samples_merged_q_0.05_peak_1809	3.62442	4.27018	1.44233	Promoter (<=1kb)	13	69646078	69682736	36659	2	ENSMUST00000198607.5	-18	Tent4a
210933	chr1	25970356	25970710	355	*	samples_merged_q_0.05_peak_148	5.29877	7.23435	3.62896	Distal Intergenic	1	25106631	25868788	762158	2	ENSMUST00000151309.8	-101568	Adgrb3
210940	chr1	26692741	26693084	344	*	samples_merged_q_0.05_peak_150	4.15862	5.41808	2.20975	Distal Intergenic	1	26720895	26726541	5647	2	ENSMUST00000097801.4	33457	4931408C20Rik
210940	chr1	26876678	26876960	283	*	samples_merged_q_0.05_peak_151	5.88752	8.39308	4.58091	Distal Intergenic	1	26720895	26726541	5647	2	ENSMUST00000097801.4	-150137	4931408C20Rik
210962	chr1	28389982	28390283	302	*	samples_merged_q_0.05_peak_158	4.58904	6.55746	3.06387	Distal Intergenic	1	28815198	28819333	4136	2	ENSMUST00000059937.5	429050	Gm597
210962	chr1	28707346	28707655	310	*	samples_merged_q_0.05_peak_160	4.81862	6.30189	2.854	Distal Intergenic	1	28815198	28819333	4136	2	ENSMUST00000059937.5	111678	Gm597
211147	chr15	26309193	26309677	485	*	samples_merged_q_0.05_peak_2376	3.61397	4.18345	1.42191	Promoter (<=1kb)	15	26309150	26409662	100513	1	ENSMUST00000152841.2	43	Marchf11
211652	chr11	35870904	35871241	338	*	samples_merged_q_0.05_peak_1160	4.56299	6.78483	3.27288	Promoter (<=1kb)	11	35729227	35871354	142128	2	ENSMUST00000018993.7	113	Wwc1
211673	chr1	10303001	10303386	386	*	samples_merged_q_0.05_peak_75	4.14876	5.22048	2.05081	Promoter (<=1kb)	1	10243300	10302895	59596	2	ENSMUST00000131556.2	-106	Arfgef1
211739	chr11	15829751	15830178	428	*	samples_merged_q_0.05_peak_1095	6.013	8.60533	4.74735	Distal Intergenic	11	16207724	16234186	26463	1	ENSMUST00000109645.9	-377546	Vstm2a
211770	chr15	59520005	59520350	346	*	samples_merged_q_0.05_peak_2490	3.75467	4.7953	1.8549	Promoter (<=1kb)	15	59520199	59528948	8750	1	ENSMUST00000067543.8	0	Trib1
212085	chr14	106315340	106315606	267	*	samples_merged_q_0.05_peak_2217	4.14219	5.21023	2.0456	Distal Intergenic	14	106343632	106346706	3075	1	ENSMUST00000022708.7	-28026	Trim52
212539	chr12	111452075	111452454	380	*	samples_merged_q_0.05_peak_1623	5.42095	7.43979	3.75036	Promoter (<=1kb)	12	111451043	111452257	1215	2	ENSMUST00000010673.7	0	Gm266
212952	chrX	89580991	89581260	270	*	samples_merged_q_0.05_peak_7263	4.1939	5.17707	2.0456	Distal Intergenic	20	89935748	89936740	993	1	ENSMUST00000172155.2	-354488	Mageb11
21336	chr6	82408760	82409061	302	*	samples_merged_q_0.05_peak_5653	4.17185	5.65621	2.41636	Intron (ENSMUST00000032122.11/21336, intron 2 of 5)	6	82379768	82537085	157318	1	ENSMUST00000203775.2	28992	Tacr1
21338	chr3	134533872	134534209	338	*	samples_merged_q_0.05_peak_4488	4.21629	5.21428	2.0456	Promoter (<=1kb)	3	134534768	134640340	105573	1	ENSMUST00000029822.6	-559	Tacr3
213827	chr9	44662018	44662415	398	*	samples_merged_q_0.05_peak_6626	4.11951	5.05447	2.02812	Intron (ENSMUST00000034607.10/213827, intron 7 of 9)	9	44667324	44671389	4066	2	ENSMUST00000125164.2	8974	Arcn1
213948	chr5	24592866	24593140	275	*	samples_merged_q_0.05_peak_5068	5.29877	7.23435	3.62896	Promoter (<=1kb)	5	24592103	24592964	862	2	ENSMUST00000128831.2	0	Atg9b
213990	chr5	24656702	24657170	469	*	samples_merged_q_0.05_peak_5069	5.25921	7.16846	3.61858	Promoter (<=1kb)	5	24657175	24707045	49871	1	ENSMUST00000024123.9	-5	Agap3
214158	chr13	23965264	23965530	267	*	samples_merged_q_0.05_peak_1724	4.71154	6.28175	2.854	Promoter (<=1kb)	13	23966524	23975511	8988	1	ENSMUST00000074067.4	-994	Trim38
21423	chr10	80269016	80269581	566	*	samples_merged_q_0.05_peak_907	4.62069	6.35706	2.88522	Promoter (<=1kb)	10	80245348	80269471	24124	2	ENSMUST00000105344.8	0	Tcf3
214290	chr13	59970709	59971125	417	*	samples_merged_q_0.05_peak_1788	9.83771	18.0558	13.4941	Promoter (<=1kb)	13	59919375	59970961	51587	2	ENSMUST00000071703.6	0	Tut7
214498	chr1	142520096	142520415	320	*	samples_merged_q_0.05_peak_530	4.21629	5.21428	2.0456	Distal Intergenic	1	143481899	143516319	34421	2	ENSMUST00000162638.2	995904	Cdc73
214597	chr9	45866075	45866392	318	*	samples_merged_q_0.05_peak_6628	3.75467	4.7953	1.8549	Promoter (<=1kb)	9	45849173	45866275	17103	2	ENSMUST00000114573.9	0	Sidt2
214804	chr3	145693671	145694024	354	*	samples_merged_q_0.05_peak_4509	4.41073	5.63422	2.4059	Promoter (<=1kb)	3	145693892	145726054	32163	1	ENSMUST00000212479.2	0	Syde2
214812	chr9	65734779	65735156	378	*	samples_merged_q_0.05_peak_6658	8.83128	14.738	10.3679	Promoter (<=1kb)	9	65599673	65734846	135174	2	ENSMUST00000159109.2	0	Zfp609
215449	chr10	117681533	117682066	534	*	samples_merged_q_0.05_peak_1005	4.18274	5.91275	2.63496	Promoter (<=1kb)	10	117649776	117681940	32165	2	ENSMUST00000064667.9	0	Rap1b
215641	chrX	91610890	91611160	271	*	samples_merged_q_0.05_peak_7284	4.21629	5.21428	2.0456	Intron (ENSMUST00000113955.2/215641, intron 1 of 4)	20	91162485	91643178	480694	2	ENSMUST00000113955.2	32018	Mageb18
215789	chr10	13349989	13350325	337	*	samples_merged_q_0.05_peak_687	3.61397	4.18345	1.42191	Promoter (<=1kb)	10	13083461	13350156	266696	2	ENSMUST00000105545.12	0	Phactr2
215890	chr10	33387071	33387413	343	*	samples_merged_q_0.05_peak_760	4.81862	6.30189	2.854	Distal Intergenic	10	33388884	33500192	111309	2	ENSMUST00000159533.9	112779	Clvs2
215890	chr10	33456460	33456720	261	*	samples_merged_q_0.05_peak_761	3.53251	4.05064	1.38591	Exon (ENSMUST00000219677.2/ENSMUST00000219677.2, exon 1 of 1)	10	33388884	33500192	111309	2	ENSMUST00000159533.9	43472	Clvs2
215890	chr10	33508574	33508934	361	*	samples_merged_q_0.05_peak_762	3.33748	3.97873	1.37569	Intron (ENSMUST00000160756.2/102632938, intron 1 of 4)	10	33388282	33500765	112484	2	ENSMUST00000019920.13	-7809	Clvs2
215919	chr10	38659244	38659572	329	*	samples_merged_q_0.05_peak_793	4.14219	5.21023	2.0456	Distal Intergenic	10	38696537	38697775	1239	2	ENSMUST00000179279.2	38203	Rfpl4b
216151	chr10	79575348	79575665	318	*	samples_merged_q_0.05_peak_903	3.46947	3.94932	1.364	Promoter (<=1kb)	10	79573922	79575209	1288	2	ENSMUST00000162679.2	-139	Polrmt
216238	chr10	95843838	95844216	379	*	samples_merged_q_0.05_peak_944	4.44503	5.86285	2.59645	Intron (ENSMUST00000218291.2/216238, intron 9 of 17)	10	95776619	95838815	62197	1	ENSMUST00000218517.2	67219	Eea1
216613	chr11	28213206	28213503	298	*	samples_merged_q_0.05_peak_1132	4.70802	6.11741	2.78461	Distal Intergenic	11	28338817	28384110	45294	2	ENSMUST00000160016.8	170607	Ccdc85a
216760	chr11	57452013	57452375	363	*	samples_merged_q_0.05_peak_1208	4.15862	5.41808	2.20975	Distal Intergenic	11	57413790	57420352	6563	1	ENSMUST00000108848.2	38223	Mfap3
216820	chr11	60744571	60744881	311	*	samples_merged_q_0.05_peak_1211	5.24075	7.13781	3.59091	Intron (ENSMUST00000042281.14/216820, intron 5 of 6)	11	60721505	60751021	29517	1	ENSMUST00000108718.2	23066	Dhrs7b
217194	chr11	100365266	100365539	274	*	samples_merged_q_0.05_peak_1274	3.97839	4.82574	1.8769	Promoter (1-2kb)	11	100353440	100363567	10128	2	ENSMUST00000056665.4	-1699	Klhl11
217207	chr11	101605637	101606016	380	*	samples_merged_q_0.05_peak_1275	5.42095	7.43979	3.75036	Distal Intergenic	11	101623745	101626522	2778	1	ENSMUST00000125409.2	-17729	Dhx8
217340	chr11	116303602	116303879	278	*	samples_merged_q_0.05_peak_1304	5.22241	7.10744	3.56276	Promoter (<=1kb)	11	116227179	116303830	76652	2	ENSMUST00000100202.10	0	Rnf157
217558	chr12	51273072	51273345	274	*	samples_merged_q_0.05_peak_1461	3.42225	4.2824	1.44679	Distal Intergenic	12	51394844	51423769	28926	1	ENSMUST00000054308.13	-121499	G2e3
21763	chr11	106503613	106503966	354	*	samples_merged_q_0.05_peak_1286	6.2304	9.18153	5.27989	Promoter (<=1kb)	11	106392973	106503756	110784	2	ENSMUST00000042780.14	0	Tex2
217684	chr12	80837491	80837781	291	*	samples_merged_q_0.05_peak_1541	4.42544	5.65775	2.41636	Promoter (<=1kb)	12	80837333	80927609	90277	1	ENSMUST00000068519.7	158	Susd6
21769	chr17	30224081	30224443	363	*	samples_merged_q_0.05_peak_2933	5.08026	6.8739	3.35393	Promoter (<=1kb)	17	30224128	30354615	130488	1	ENSMUST00000234238.2	0	Zfand3
217692	chr12	82543824	82544437	614	*	samples_merged_q_0.05_peak_1545	3.75467	4.7953	1.8549	Distal Intergenic	12	82467389	82471912	4524	1	ENSMUST00000221169.2	76435	Sipa1l1
217893	chr12	112993064	112993335	272	*	samples_merged_q_0.05_peak_1628	3.61397	4.18345	1.42191	Intron (ENSMUST00000223502.2/217893, intron 1 of 23)	12	112978154	113013475	35322	1	ENSMUST00000222406.2	14910	Pacs2
218203	chr13	45587188	45587448	261	*	samples_merged_q_0.05_peak_1770	3.33748	3.97873	1.37569	Distal Intergenic	13	45544403	45564521	20119	1	ENSMUST00000222178.2	42785	Mylip
218210	chr13	46881119	46881435	317	*	samples_merged_q_0.05_peak_1771	5.69551	8.31056	4.5373	Promoter (<=1kb)	13	46833381	46881416	48036	2	ENSMUST00000021803.10	0	Nup153
21833	chr11	98632486	98633111	626	*	samples_merged_q_0.05_peak_1268	4.5312	5.82802	2.565	Promoter (<=1kb)	11	98632637	98648521	15885	1	ENSMUST00000152195.7	0	Thra
21834	chr14	4914523	4914818	296	*	samples_merged_q_0.05_peak_1969	4.62069	6.35706	2.88522	Distal Intergenic	14	4506571	4809435	302865	2	ENSMUST00000224470.2	-105088	Thrb
21834	chr14	4916946	4917221	276	*	samples_merged_q_0.05_peak_1970	3.89319	4.82463	1.8769	Distal Intergenic	14	4506571	4809435	302865	2	ENSMUST00000224470.2	-107511	Thrb
218772	chr14	5516478	5517062	585	*	samples_merged_q_0.05_peak_1975	4.69137	6.08989	2.78461	Distal Intergenic	14	5650540	5960698	310159	1	ENSMUST00000223976.2	-133478	Rarb
21929	chr10	18914608	18914874	267	*	samples_merged_q_0.05_peak_709	3.51853	4.02806	1.38591	Distal Intergenic	10	18884014	18891405	7392	2	ENSMUST00000122863.2	-23203	Tnfaip3
22032	chr11	78056103	78056464	362	*	samples_merged_q_0.05_peak_1238	4.21629	5.21428	2.0456	Promoter (<=1kb)	11	78049325	78056415	7091	2	ENSMUST00000149437.8	0	Traf4
22074	chr6	41191922	41192193	272	*	samples_merged_q_0.05_peak_5489	3.53251	4.05064	1.38591	Distal Intergenic	6	41279203	41282466	3264	1	ENSMUST00000031913.5	-87010	Try4
22095	chr12	91355097	91355507	411	*	samples_merged_q_0.05_peak_1562	4.71002	6.12072	2.78461	Intron (ENSMUST00000221216.2/22095, intron 2 of 10)	12	91351340	91516582	165243	1	ENSMUST00000221216.2	3757	Tshr
22099	chr1	117981954	117982252	299	*	samples_merged_q_0.05_peak_473	4.15862	5.41808	2.20975	Distal Intergenic	1	118228619	118237716	9098	2	ENSMUST00000188512.7	255464	Tsn
22157	chr17	28601697	28602248	552	*	samples_merged_q_0.05_peak_2928	3.58184	4.1308	1.42191	Distal Intergenic	17	28570489	28584196	13708	2	ENSMUST00000041819.14	-17501	Tulp1
22177	chr7	30096541	30096927	387	*	samples_merged_q_0.05_peak_5881	4.65844	6.03562	2.74042	Distal Intergenic	7	30113185	30117007	3823	1	ENSMUST00000207982.2	-16258	Tyrobp
22178	chr4	79645974	79646302	329	*	samples_merged_q_0.05_peak_4809	3.50614	4.0081	1.38591	Distal Intergenic	4	80752360	80755921	3562	1	ENSMUST00000133655.8	-1106058	Tyrp1
22178	chr4	80313433	80313722	290	*	samples_merged_q_0.05_peak_4813	3.51853	4.02806	1.38591	Distal Intergenic	4	80752360	80755921	3562	1	ENSMUST00000133655.8	-438638	Tyrp1
22190	chr5	125454485	125454922	438	*	samples_merged_q_0.05_peak_5333	3.58184	4.1308	1.42191	Distal Intergenic	5	125464723	125466250	1528	2	ENSMUST00000108707.3	11328	Ubc
22222	chr2	120796466	120796747	282	*	samples_merged_q_0.05_peak_3879	4.57809	5.90416	2.63075	Intron (ENSMUST00000028728.6/22222, intron 1 of 46)	2	120775939	120801094	25156	2	ENSMUST00000133408.2	4347	Ubr1
22325	chr2	27316888	27317147	260	*	samples_merged_q_0.05_peak_3570	4.12126	5.05733	2.02812	Promoter (<=1kb)	2	27152116	27316924	164809	2	ENSMUST00000185188.8	0	Vav2
223255	chr14	121616315	121616600	286	*	samples_merged_q_0.05_peak_2267	3.42225	4.2824	1.44679	Promoter (<=1kb)	14	121523755	121616746	92992	2	ENSMUST00000079817.8	146	Stk24
22333	chr11	52251560	52251868	309	*	samples_merged_q_0.05_peak_1200	4.12126	5.05733	2.02812	Promoter (<=1kb)	11	52251687	52280224	28538	1	ENSMUST00000102758.8	0	Vdac1
223658	chr15	76283671	76283953	283	*	samples_merged_q_0.05_peak_2556	3.43357	3.89214	1.3205	Intron (ENSMUST00000161305.8/223658, intron 4 of 31)	15	76274231	76323944	49714	1	ENSMUST00000092595.11	9440	Mroh1
223666	chr15	76713314	76713763	450	*	samples_merged_q_0.05_peak_2557	3.69655	4.5237	1.63575	Distal Intergenic	15	76608185	76702370	94186	2	ENSMUST00000239134.2	-10944	Arhgap39
22384	chr5	134667975	134668501	527	*	samples_merged_q_0.05_peak_5343	5.62559	7.95832	4.23008	Promoter (<=1kb)	5	134648575	134668344	19770	2	ENSMUST00000202622.4	0	Eif4h
224105	chr16	31861528	31861925	398	*	samples_merged_q_0.05_peak_2668	4.15862	5.41808	2.20975	Promoter (<=1kb)	16	31851903	31862818	10916	2	ENSMUST00000125019.2	893	Pak2
22411	chr7	98441892	98442331	440	*	samples_merged_q_0.05_peak_6084	3.61397	4.18345	1.42191	Distal Intergenic	7	98484319	98495794	11476	1	ENSMUST00000165122.8	-41988	Wnt11
224132	chr16	35589410	35589691	282	*	samples_merged_q_0.05_peak_2674	4.65844	6.03562	2.74042	Promoter (<=1kb)	16	35517918	35589700	71783	2	ENSMUST00000149892.2	9	Slc49a4
22417	chr4	137004307	137004614	308	*	samples_merged_q_0.05_peak_4975	3.61397	4.18345	1.42191	Promoter (<=1kb)	4	137004800	137027037	22238	1	ENSMUST00000045747.5	-186	Wnt4
22427	chr8	33839210	33839747	538	*	samples_merged_q_0.05_peak_6235	5.29877	7.23435	3.62896	Intron (ENSMUST00000033991.13/22427, intron 3 of 33)	8	33725712	33820578	94867	2	ENSMUST00000211498.2	-18632	Wrn
22431	chr2	104979870	104980147	278	*	samples_merged_q_0.05_peak_3828	4.71002	6.12072	2.78461	Intron (ENSMUST00000143043.8/22431, intron 5 of 9)	2	104993153	105000356	7204	1	ENSMUST00000153944.2	-13006	Wt1
224318	chr16	69757497	69757859	363	*	samples_merged_q_0.05_peak_2785	5.29877	7.23435	3.62896	Distal Intergenic	16	69653762	69660632	6871	2	ENSMUST00000076500.14	-96865	Speer2
224640	chr17	27423029	27423374	346	*	samples_merged_q_0.05_peak_2925	5.22241	7.10744	3.56276	Promoter (<=1kb)	17	27408574	27423443	14870	2	ENSMUST00000055117.9	69	Lemd2
224753	chr17	36749055	36749330	276	*	samples_merged_q_0.05_peak_2946	3.97839	4.82574	1.8769	Distal Intergenic	17	36771056	36773221	2166	2	ENSMUST00000169950.2	23891	H2-M10.4
224813	chr17	46565030	46565321	292	*	samples_merged_q_0.05_peak_2985	4.15862	5.41808	2.20975	Promoter (<=1kb)	17	46565092	46568136	3045	1	ENSMUST00000233543.2	0	Lrrc73
224824	chr17	47022449	47022771	323	*	samples_merged_q_0.05_peak_2987	5.37276	7.35839	3.72694	Promoter (<=1kb)	17	47022402	47028382	5981	1	ENSMUST00000127897.2	47	Pex6
224997	chr17	70780166	70780442	277	*	samples_merged_q_0.05_peak_3056	4.21629	5.21428	2.0456	Intron (ENSMUST00000133983.8/224997, intron 4 of 13)	17	70823017	71125229	302213	1	ENSMUST00000135938.8	-42575	Dlgap1
225028	chr17	81035360	81035637	278	*	samples_merged_q_0.05_peak_3078	4.1939	5.17707	2.0456	Promoter (<=1kb)	17	80887941	81035522	147582	2	ENSMUST00000112389.9	0	Map4k3
225055	chr17	88373089	88373542	454	*	samples_merged_q_0.05_peak_3090	3.62442	4.27018	1.44233	Promoter (<=1kb)	17	88298287	88372719	74433	2	ENSMUST00000005504.15	-370	Fbxo11
225131	chr18	8239790	8240231	442	*	samples_merged_q_0.05_peak_3134	3.62442	4.27018	1.44233	Distal Intergenic	18	7910619	7918503	7885	1	ENSMUST00000167542.2	329171	Wac
225182	chr18	11566363	11566623	261	*	samples_merged_q_0.05_peak_3148	3.33748	3.97873	1.37569	Distal Intergenic	18	11766333	11876264	109932	1	ENSMUST00000115861.9	-199710	Rbbp8
225326	chr18	30226300	30226665	366	*	samples_merged_q_0.05_peak_3204	4.12126	5.05733	2.02812	Distal Intergenic	18	30400302	30405186	4885	1	ENSMUST00000234467.2	-173637	Pik3c3
225631	chr18	64473466	64473835	370	*	samples_merged_q_0.05_peak_3289	4.59394	5.92998	2.64904	Promoter (<=1kb)	18	64473091	64534058	60968	1	ENSMUST00000175965.10	375	Onecut2
225651	chr18	67364129	67364470	342	*	samples_merged_q_0.05_peak_3295	5.88752	8.39308	4.58091	Intron (ENSMUST00000073054.5/225651, intron 4 of 10)	18	67358762	67378348	19587	2	ENSMUST00000236244.2	13878	Mppe1
22589	chrX	104886436	104886714	279	*	samples_merged_q_0.05_peak_7357	4.14219	5.21023	2.0456	Intron (ENSMUST00000113573.8/22589, intron 19 of 34)	20	104881630	104890379	8750	2	ENSMUST00000155445.6	3665	Atrx
226101	chr19	37886728	37887126	399	*	samples_merged_q_0.05_peak_3456	4.16383	5.12732	2.0456	Promoter (2-3kb)	19	37887916	37889951	2036	2	ENSMUST00000225435.2	2825	Myof
22631	chr15	36792963	36793440	478	*	samples_merged_q_0.05_peak_2418	4.18803	5.28193	2.10909	Promoter (<=1kb)	15	36791088	36793454	2367	2	ENSMUST00000151635.2	14	Ywhaz
22632	chr12	108758603	108759117	515	*	samples_merged_q_0.05_peak_1614	5.1219	7.14618	3.59864	Promoter (<=1kb)	12	108758899	108786074	27176	1	ENSMUST00000021692.9	0	Yy1
226409	chr1	128007643	128008039	397	*	samples_merged_q_0.05_peak_499	4.12126	5.05733	2.02812	Intron (ENSMUST00000086614.12/226409, intron 2 of 20)	1	127985593	128030191	44599	2	ENSMUST00000124876.2	22152	Zranb3
226442	chr1	136552834	136553097	264	*	samples_merged_q_0.05_peak_516	3.9246	4.73979	1.81811	Promoter (<=1kb)	1	136552639	136557791	5153	1	ENSMUST00000112046.2	195	Zfp281
226517	chr1	152777553	152778146	594	*	samples_merged_q_0.05_peak_577	4.00583	4.86985	1.91261	Promoter (<=1kb)	1	152712746	152778373	65628	2	ENSMUST00000073441.13	227	Smg7
226601	chr1	166372632	166372894	263	*	samples_merged_q_0.05_peak_604	4.21629	5.21428	2.0456	Distal Intergenic	1	166311182	166325157	13976	2	ENSMUST00000143922.2	-47475	Gm4846
226604	chr1	166440643	166440956	314	*	samples_merged_q_0.05_peak_610	5.42095	7.43979	3.75036	Distal Intergenic	1	166456540	166475262	18723	2	ENSMUST00000046662.8	34306	Gm4847
22666	chr17	69690135	69690464	330	*	samples_merged_q_0.05_peak_3050	5.17774	7.23502	3.62896	Promoter (<=1kb)	17	69690314	69697745	7432	1	ENSMUST00000062369.14	0	Zbtb14
226791	chr1	185620470	185620747	278	*	samples_merged_q_0.05_peak_641	3.69655	4.5237	1.63575	Distal Intergenic	1	185820730	185849485	28756	2	ENSMUST00000195481.2	228738	Lyplal1
22682	chr19	21250017	21250344	328	*	samples_merged_q_0.05_peak_3415	5.08276	7.33658	3.70729	Promoter (<=1kb)	19	21250051	21257797	7747	1	ENSMUST00000149144.8	0	Zfand5
226849	chr1	191128439	191129133	695	*	samples_merged_q_0.05_peak_647	5.84356	8.31937	4.54449	Promoter (<=1kb)	1	191117163	191128516	11354	2	ENSMUST00000194953.2	0	Ppp2r5a
226976	chr1	36407986	36408461	476	*	samples_merged_q_0.05_peak_194	14.6605	29.2763	24.4078	Promoter (<=1kb)	1	36374811	36408238	33428	2	ENSMUST00000185912.7	0	Kansl3
22702	chr8	43814275	43814556	282	*	samples_merged_q_0.05_peak_6264	3.62442	4.27018	1.44233	Distal Intergenic	8	43748104	43760017	11914	2	ENSMUST00000082120.5	-54258	Zfp42
227059	chr1	46891960	46892470	511	*	samples_merged_q_0.05_peak_230	3.69655	4.5237	1.63575	Promoter (<=1kb)	1	46846704	46893206	46503	2	ENSMUST00000027131.6	736	Slc39a10
227485	chr1	111235944	111236214	271	*	samples_merged_q_0.05_peak_440	4.71002	6.12072	2.78461	Distal Intergenic	1	110878083	110905314	27232	2	ENSMUST00000187555.2	-330630	Cdh19
22773	chrX	57169675	57170101	427	*	samples_merged_q_0.05_peak_7031	5.88752	8.39308	4.58091	Distal Intergenic	20	57076370	57087096	10727	1	ENSMUST00000088629.4	93305	Zic3
227737	chr2	32766209	32766470	262	*	samples_merged_q_0.05_peak_3581	4.13418	5.07852	2.04132	Promoter (<=1kb)	2	32766126	32815266	49141	1	ENSMUST00000028135.15	83	Niban2
227738	chr2	32820318	32820603	286	*	samples_merged_q_0.05_peak_3582	3.53251	4.05064	1.38591	Intron (ENSMUST00000028132.14/227738, intron 21 of 24)	2	32825857	32828811	2955	2	ENSMUST00000195776.2	8208	Lrsam1
227867	chr2	49455792	49456094	303	*	samples_merged_q_0.05_peak_3635	3.69655	4.5237	1.63575	Distal Intergenic	2	49418887	49427093	8207	1	ENSMUST00000152485.2	36905	Epc2
228536	chr2	118731870	118732231	362	*	samples_merged_q_0.05_peak_3873	5.20421	7.07735	3.5355	Promoter (<=1kb)	2	118731934	118755009	23076	1	ENSMUST00000036578.7	0	Bahd1
228564	chr2	121427817	121428153	337	*	samples_merged_q_0.05_peak_3882	4.07614	4.98365	2.00495	Intron (ENSMUST00000110593.9/228564, intron 1 of 14)	2	121376010	121416914	40905	2	ENSMUST00000133898.8	-10903	Frmd5
228994	chr2	180562448	180562856	409	*	samples_merged_q_0.05_peak_4000	6.47627	9.59271	5.62524	Promoter (<=1kb)	2	180546170	180562742	16573	2	ENSMUST00000037299.15	0	Ythdf1
229096	chr3	16766683	16767024	342	*	samples_merged_q_0.05_peak_4082	4.2091	5.20232	2.0456	Distal Intergenic	3	16237400	16271019	33620	1	ENSMUST00000108346.5	529283	Ythdf3
229473	chr3	83946803	83947685	883	*	samples_merged_q_0.05_peak_4337	5.15373	7.19678	3.62896	Promoter (<=1kb)	3	83804962	83947482	142521	2	ENSMUST00000191758.6	0	Tmem131l
230073	chr4	40242694	40243156	463	*	samples_merged_q_0.05_peak_4707	4.17185	5.65621	2.41636	Promoter (2-3kb)	4	40204849	40239828	34980	2	ENSMUST00000037907.13	-2866	Rigi
230073	chr4	40250605	40250863	259	*	samples_merged_q_0.05_peak_4708	4.81862	6.30189	2.854	Distal Intergenic	4	40204849	40239828	34980	2	ENSMUST00000037907.13	-10777	Rigi
230249	chr4	58911677	58912029	353	*	samples_merged_q_0.05_peak_4739	3.69655	4.5237	1.63575	Promoter (<=1kb)	4	58811431	58911930	100500	2	ENSMUST00000149301.8	0	Ecpas
230587	chr4	107291659	107291951	293	*	samples_merged_q_0.05_peak_4900	4.75866	6.20152	2.8211	Promoter (<=1kb)	4	107291788	107293233	1446	1	ENSMUST00000130573.2	0	Glis1
230735	chr4	124769596	124769876	281	*	samples_merged_q_0.05_peak_4948	5.86422	8.35397	4.56454	Distal Intergenic	4	124774692	124780723	6032	1	ENSMUST00000059343.7	-4816	Epha10
230770	chr4	129588651	129588961	311	*	samples_merged_q_0.05_peak_4955	4.14219	5.21023	2.0456	Promoter (1-2kb)	4	129585761	129590413	4653	2	ENSMUST00000137640.3	1452	Tmem39b
230789	chr4	132649666	132650067	402	*	samples_merged_q_0.05_peak_4960	3.75467	4.7953	1.8549	Promoter (<=1kb)	4	132626524	132649869	23346	2	ENSMUST00000030696.11	0	Fam76a
230806	chr4	133770550	133770836	287	*	samples_merged_q_0.05_peak_4968	4.2091	5.20232	2.0456	Distal Intergenic	4	133788126	133799967	11842	1	ENSMUST00000219402.3	-17290	Crybg2
230809	chr4	134014509	134015040	532	*	samples_merged_q_0.05_peak_4969	3.42225	4.2824	1.44679	Promoter (<=1kb)	4	134002313	134014550	12238	2	ENSMUST00000105877.9	0	Pdik1l
231051	chr5	25704549	25704971	423	*	samples_merged_q_0.05_peak_5070	4.58904	6.55746	3.06387	Promoter (<=1kb)	5	25587630	25703781	116152	2	ENSMUST00000172626.2	-768	Kmt2c
231329	chr5	77457751	77458037	287	*	samples_merged_q_0.05_peak_5223	4.14219	5.21023	2.0456	Promoter (<=1kb)	5	77457994	77497171	39178	1	ENSMUST00000031167.6	0	Polr2b
231549	chr5	105847704	105848348	645	*	samples_merged_q_0.05_peak_5306	4.94564	6.65564	3.15578	Promoter (<=1kb)	5	105847835	105963081	115247	1	ENSMUST00000060531.16	0	Lrrc8d
231989	chr6	53151153	53151481	329	*	samples_merged_q_0.05_peak_5530	3.33748	3.97873	1.37569	Distal Intergenic	6	53198149	53201960	3812	1	ENSMUST00000205210.2	-46668	Gm4872
232237	chr6	92024424	92024876	453	*	samples_merged_q_0.05_peak_5667	3.61397	4.18345	1.42191	Intron (ENSMUST00000089334.9/232237, intron 5 of 20)	6	92044410	92052985	8576	1	ENSMUST00000146743.2	-19534	Fgd5
232341	chr6	120014989	120015409	421	*	samples_merged_q_0.05_peak_5734	4.0197	4.8922	1.93086	Promoter (<=1kb)	6	119930611	120015568	84958	2	ENSMUST00000159397.8	159	Wnk1
232853	chr7	7096311	7096614	304	*	samples_merged_q_0.05_peak_5828	3.69655	4.5237	1.63575	Distal Intergenic	7	7122019	7124444	2426	2	ENSMUST00000210142.2	27830	Zfp954
232925	chr7	17858673	17859017	345	*	samples_merged_q_0.05_peak_5859	4.00583	4.86985	1.91261	Intron (ENSMUST00000205637.2/ENSMUST00000205637.2, intron 1 of 4)	7	17910419	17915787	5369	1	ENSMUST00000152973.2	-51402	Igfl3
233489	chr7	89779240	89779959	720	*	samples_merged_q_0.05_peak_6060	5.58769	7.89623	4.17279	Promoter (<=1kb)	7	89779421	89858140	78720	1	ENSMUST00000207225.2	0	Picalm
233532	chr7	97236224	97236513	290	*	samples_merged_q_0.05_peak_6080	4.48526	5.75382	2.49959	Intron (ENSMUST00000156060.8/233532, intron 1 of 14)	7	97229114	97288670	59557	1	ENSMUST00000127891.3	7110	Rsf1
233537	chr7	97564887	97565204	318	*	samples_merged_q_0.05_peak_6082	4.17881	5.15208	2.0456	Distal Intergenic	7	97569162	97698870	129709	1	ENSMUST00000041860.13	-3958	Gdpd4
233781	chr7	116980336	116980899	564	*	samples_merged_q_0.05_peak_6131	4.14219	5.21023	2.0456	Promoter (<=1kb)	7	116980214	117272803	292590	1	ENSMUST00000032892.7	122	Xylt1
233890	chr7	126944545	126944840	296	*	samples_merged_q_0.05_peak_6142	3.62442	4.27018	1.44233	Promoter (<=1kb)	7	126941967	126944595	2629	2	ENSMUST00000060783.7	0	Zfp768
234353	chr8	68550588	68550854	267	*	samples_merged_q_0.05_peak_6347	3.53251	4.05064	1.38591	Intron (ENSMUST00000212960.2/234353, intron 2 of 16)	8	68552106	68573965	21860	2	ENSMUST00000185416.3	23111	Psd3
234582	chr8	95644237	95644726	490	*	samples_merged_q_0.05_peak_6411	5.22241	7.10744	3.56276	Promoter (<=1kb)	8	95629497	95644726	15230	2	ENSMUST00000077955.6	0	Ccdc102a
234624	chr8	100524507	100524794	288	*	samples_merged_q_0.05_peak_6431	4.65997	6.20019	2.8211	Distal Intergenic	8	100143306	100460070	316765	1	ENSMUST00000153366.2	381201	A330008L17Rik
234736	chr8	112026822	112027129	308	*	samples_merged_q_0.05_peak_6453	3.91139	4.71876	1.80055	Promoter (<=1kb)	8	111997576	112026854	29279	2	ENSMUST00000038739.5	0	Rfwd3
234915	chr9	8127923	8128182	260	*	samples_merged_q_0.05_peak_6510	4.71002	6.12072	2.78461	Intron (ENSMUST00000037397.8/234915, intron 2 of 10)	9	8076462	8134295	57834	2	ENSMUST00000037397.8	6113	Cep126
235106	chr9	29106439	29106721	283	*	samples_merged_q_0.05_peak_6584	4.12126	5.05733	2.02812	Intron (ENSMUST00000075069.11/235106, intron 2 of 7)	9	28920524	29096961	176438	2	ENSMUST00000126044.8	-9478	Ntm
235132	chr9	30941925	30942275	351	*	samples_merged_q_0.05_peak_6587	4.21629	5.21428	2.0456	Promoter (<=1kb)	9	30941940	30981529	39590	1	ENSMUST00000216649.2	0	Zbtb44
235344	chr9	50920089	50920628	540	*	samples_merged_q_0.05_peak_6635	7.65377	12.1013	7.90219	Promoter (<=1kb)	9	50804101	50920236	116136	2	ENSMUST00000176663.8	0	Sik2
235441	chr9	66499866	66500474	609	*	samples_merged_q_0.05_peak_6661	10.8733	20.7428	16.0713	Promoter (<=1kb)	9	66421919	66500424	78506	2	ENSMUST00000127569.8	0	Usp3
235567	chr9	104139924	104140233	310	*	samples_merged_q_0.05_peak_6741	5.29877	7.23435	3.62896	Promoter (<=1kb)	9	104028481	104140129	111649	2	ENSMUST00000035170.13	0	Dnajc13
235584	chr9	106245670	106245976	307	*	samples_merged_q_0.05_peak_6745	5.84059	9.47213	5.52406	Promoter (<=1kb)	9	106245831	106252923	7093	1	ENSMUST00000172306.3	0	Dusp7
236285	chrX	9066803	9067160	358	*	samples_merged_q_0.05_peak_6801	4.21629	5.21428	2.0456	Promoter (<=1kb)	20	9066141	9134324	68184	1	ENSMUST00000069763.3	662	Lancl3
236727	chrX	20151764	20152315	552	*	samples_merged_q_0.05_peak_6865	4.71002	6.12072	2.78461	Intron (ENSMUST00000072451.11/236727, intron 1 of 16)	20	20018691	20158009	139319	2	ENSMUST00000115393.3	5694	Slc9a7
237339	chr10	26251030	26251368	339	*	samples_merged_q_0.05_peak_729	5.17774	7.23502	3.62896	Promoter (<=1kb)	10	26151350	26251181	99832	2	ENSMUST00000174766.2	0	L3mbtl3
237759	chr11	51180824	51181126	303	*	samples_merged_q_0.05_peak_1198	3.80249	5.07751	2.04132	Promoter (<=1kb)	11	51180747	51474745	293999	1	ENSMUST00000102765.9	77	Col23a1
237928	chr11	95603917	95604238	322	*	samples_merged_q_0.05_peak_1260	3.49322	4.58815	1.69071	Promoter (<=1kb)	11	95603837	95725941	122105	1	ENSMUST00000133070.8	80	Phospho1
237943	chr11	102384717	102385062	346	*	samples_merged_q_0.05_peak_1277	7.16367	10.9979	6.89579	Intron (ENSMUST00000143842.2/237943, intron 6 of 7)	11	102368033	102399273	31241	2	ENSMUST00000069673.4	14211	Gpatch8
23802	chr8	94738675	94739024	350	*	samples_merged_q_0.05_peak_6410	5.29877	7.23435	3.62896	Promoter (<=1kb)	8	94725843	94738755	12913	2	ENSMUST00000143265.2	0	Amfr
238023	chr11	121108082	121108671	590	*	samples_merged_q_0.05_peak_1312	4.21629	5.21428	2.0456	Intron (ENSMUST00000038831.15/238023, intron 6 of 12)	11	121102876	121111851	8976	1	ENSMUST00000124761.2	5206	Hexd
238161	chr12	52736722	52737016	295	*	samples_merged_q_0.05_peak_1464	3.42225	4.2824	1.44679	Distal Intergenic	12	52746166	53202382	456217	1	ENSMUST00000095737.5	-9150	Akap6
23836	chr1	104068665	104068927	263	*	samples_merged_q_0.05_peak_409	4.17185	5.65621	2.41636	Distal Intergenic	1	104696254	104923206	226953	1	ENSMUST00000062528.9	-627327	Cdh20
238505	chr13	12259849	12260198	350	*	samples_merged_q_0.05_peak_1692	5.35349	7.32599	3.70729	Intron (ENSMUST00000099856.6/238505, intron 6 of 32)	13	12197598	12272981	75384	2	ENSMUST00000099856.6	12783	Mtr
23859	chr7	90359653	90360036	384	*	samples_merged_q_0.05_peak_6062	4.21629	5.21428	2.0456	Intron (ENSMUST00000231777.3/23859, intron 3 of 27)	7	90536280	90589260	52981	1	ENSMUST00000208630.2	-176244	Dlg2
238829	chrX	75349085	75349604	520	*	samples_merged_q_0.05_peak_7173	4.62069	6.35706	2.88522	Distal Intergenic	20	75307910	75311344	3435	1	ENSMUST00000096389.5	41175	Cldn34b3
239133	chr14	62530163	62530447	285	*	samples_merged_q_0.05_peak_2094	4.21629	5.21428	2.0456	Promoter (<=1kb)	14	62513680	62530412	16733	2	ENSMUST00000063169.10	0	Dleu7
239273	chr14	118943234	118943686	453	*	samples_merged_q_0.05_peak_2261	6.02328	8.62283	4.74735	Promoter (<=1kb)	14	118720104	118943617	223514	2	ENSMUST00000036554.14	0	Abcc4
23948	chr5	129661153	129661582	430	*	samples_merged_q_0.05_peak_5335	7.65377	12.1013	7.90219	Promoter (<=1kb)	5	129661233	129688163	26931	1	ENSMUST00000031390.10	0	Mmp17
23959	chr9	88196333	88196676	344	*	samples_merged_q_0.05_peak_6702	4.14219	5.21023	2.0456	Distal Intergenic	9	88209250	88254145	44896	1	ENSMUST00000034992.8	-12574	Nt5e
23965	chr8	48681648	48682078	431	*	samples_merged_q_0.05_peak_6274	4.21629	5.21428	2.0456	Exon (ENSMUST00000033965.14/23965, exon 29 of 29)	8	48728950	48753134	24185	2	ENSMUST00000145344.2	71056	Tenm3
23965	chr8	50958683	50959048	366	*	samples_merged_q_0.05_peak_6278	3.69655	4.5237	1.63575	Intron (ENSMUST00000210850.2/23965, intron 2 of 4)	8	50845745	50970677	124933	2	ENSMUST00000211156.2	11629	Tenm3
239667	chr15	99993981	99994253	273	*	samples_merged_q_0.05_peak_2596	4.71002	6.12072	2.78461	Intron (ENSMUST00000100203.10/239667, intron 1 of 37)	15	99936545	100117354	180810	1	ENSMUST00000100203.10	57436	Dip2b
239719	chr16	13074312	13074629	318	*	samples_merged_q_0.05_peak_2626	4.75866	6.20152	2.8211	Promoter (<=1kb)	16	13074345	13232927	158583	1	ENSMUST00000009713.14	0	Mrtfb
239845	chr16	37745821	37746246	426	*	samples_merged_q_0.05_peak_2676	4.69137	6.08989	2.78461	Intron (ENSMUST00000061274.9/239845, intron 1 of 9)	16	37736858	37827892	91035	1	ENSMUST00000061274.9	8963	Gpr156
239852	chr16	55077908	55078185	278	*	samples_merged_q_0.05_peak_2731	4.15862	5.41808	2.20975	Intron (ENSMUST00000036412.4/239852, intron 3 of 11)	16	55045538	55103600	58063	2	ENSMUST00000036412.4	25415	Zpld1
239985	chr17	5044357	5044857	501	*	samples_merged_q_0.05_peak_2863	6.44475	9.79908	5.82084	Promoter (<=1kb)	17	5044607	5148008	103402	1	ENSMUST00000124362.2	0	Arid1b
24012	chr1	174968559	174968846	288	*	samples_merged_q_0.05_peak_626	3.46947	3.94932	1.364	Intron (ENSMUST00000194555.6/24012, intron 6 of 17)	1	174887302	174913746	26445	2	ENSMUST00000195477.6	-54813	Rgs7
240255	chr18	45023729	45024042	314	*	samples_merged_q_0.05_peak_3241	4.16383	5.12732	2.0456	Distal Intergenic	18	44988302	44988820	519	1	ENSMUST00000202176.2	35427	Ythdc2
240832	chr1	155911264	155911527	264	*	samples_merged_q_0.05_peak_584	4.95367	6.87986	3.35952	Promoter (<=1kb)	1	155911472	155929275	17804	1	ENSMUST00000111754.9	0	Tor1aip2
241134	chr1	81389899	81390191	293	*	samples_merged_q_0.05_peak_327	4.21629	5.21428	2.0456	Distal Intergenic	1	81055300	81319479	264180	1	ENSMUST00000123285.2	334599	Nyap2
241289	chr2	28307056	28307381	326	*	samples_merged_q_0.05_peak_3571	4.79303	6.25895	2.854	Distal Intergenic	2	28336812	28340518	3707	1	ENSMUST00000128199.8	-29431	Ppp1r26
241296	chr2	30127728	30128149	422	*	samples_merged_q_0.05_peak_3573	5.17774	7.23502	3.62896	Promoter (<=1kb)	2	30127734	30153802	26069	1	ENSMUST00000095078.3	0	Lrrc8a
24136	chr2	45007149	45007442	294	*	samples_merged_q_0.05_peak_3620	3.69655	4.5237	1.63575	Promoter (<=1kb)	2	44873644	45007407	133764	2	ENSMUST00000176438.9	0	Zeb2
241516	chr2	82534041	82534312	272	*	samples_merged_q_0.05_peak_3729	4.21629	5.21428	2.0456	Distal Intergenic	2	82773978	82839281	65304	1	ENSMUST00000143764.9	-239666	Fsip2
241516	chr2	83111613	83111883	271	*	samples_merged_q_0.05_peak_3733	4.71002	6.12072	2.78461	Distal Intergenic	2	82811140	82839281	28142	1	ENSMUST00000132967.2	300473	Fsip2
241568	chr2	95965973	95966288	316	*	samples_merged_q_0.05_peak_3781	4.14219	5.21023	2.0456	Distal Intergenic	2	96148514	97462011	1313498	1	ENSMUST00000135431.8	-182226	Lrrc4c
241568	chr2	99109675	99109964	290	*	samples_merged_q_0.05_peak_3802	4.62069	6.35706	2.88522	Distal Intergenic	2	97298434	97459408	160975	1	ENSMUST00000170144.2	1811241	Lrrc4c
[truncated: 599 more rows]

## Sheet: Table S7
Table S7: PRDM15 bound and regulated
[truncated: 28 more rows]

[truncated: 1 more sheets: Table S8]
